# Supplementary material for: PI3Kδ is selectively inhibited by roginolisib through stabilizing of the C-terminal helix kα12
Source: Research Square preprint supplement (doi:10.21203/rs.3.rs-8048396/v1), 2026-01-07
Supplement: Supplementary file 2 [file 728b6900b743cd8a8f480e69.xlsx]

## Sheet: Table S3 HDX setup
		HDX experimental details
		Dataset :	State 1	State 3	State 4	State 6	State 7	State 9
		Description :	PI3Kd_WT_apo	PI3Kd_Y685A apo	PI3Kd_WT roginolisib	PI3Kd_Y685A roginolisib	PI3Kd_WT idelalisib	PI3Kd_Y685A idelalisib
		Control sample :	Non-deuterated (ND) PI3Kd_WT_apo	Non-deuterated (ND) PI3Kd_WT_apo	Non-deuterated (ND) PI3Kd_WT_apo	Non-deuterated (ND) PI3Kd_WT_apo	Non-deuterated (ND) PI3Kd_WT_apo	Non-deuterated (ND) PI3Kd_WT_apo
		D2O incubation times (sec) :	3s 30s 300s	3s 30s 300s	3s 30s 300s	3s 30s 300s	3s 30s 300s	3s 30s 300s
		Replicates :	2 2 3	3 3 3	2 3 3	3 3 3	3 2 3	3 3 3
		Sequence coverage :	0.862069	0.862069	0.862069	0.862069	0.862069	0.862069
		Number of peptides anayzed :	283	283	283	283	283	283
		Reaction volume :	50 ul	50 ul	50 ul	50 ul	50 ul	50 ul
		% D2O in the reaction :	0.863136	0.863136	0.863136	0.863136	0.863136	0.863136
		Temperature :	22 °C	22 °C	22 °C	22 °C	22 °C	22 °C
		Protein amount (pmol) :	109	109	109	109	109	109
		Protein concentration in reaction (μM) :	3	3	3	3	3	3
		Protein concentrated mix volume (μl) :	5	5	5	5	5	5
		Quench volume (μl) :	20	20	20	20	20	20
		Deuterated buffer :	10 mM Tris pH 7.5, 100 mM NaCl 100 uM Inhibitor (or DMSO)
		Quench buffer :	7 M UREA, 1 M NaCl, 100 mM NaH2PO4 (pH 2.4), 1 % Formic Acid (FA)
		Criteria for HDX rate difference :	Sum of difference for all timepoints between two states (sum-%D * sum-#D) is >5

## Sheet: Table S4 HDX Raw_values
			Replicates
	State		3s	30s	300s	0	0
State 1	PI3Kd_WT_apo		2	2	3
State 3	PI3Kd_Y685A_apo		3	3	3
State 4	PI3Kd_WT_roginolisib		2	3	3
State 6	PI3Kd_Y685A_roginolisib		3	3	3	0
State 7	PI3Kd_WT_idelalisib		3	2	3
State 9	PI3Kd_Y685A_idelalisib		3	3	3
	PI3Kd_Y685A_roginolisib
							3s	3s	3s	3s	3s	3s	30s	30s	30s	30s	30s	30s	300s	300s	300s	300s	300s	300s
State	Sequence	Start	End	Charge	Max D	Search RT	#D	#D	#D	%D	%D	%D	#D	#D	#D	%D	%D	%D	#D	#D	#D	%D	%D	%D
PI3Kd_WT_apo	FWTKEENQS	11	19	2	7	7.92	4.286	4.546	0	61.225	64.942	0	4.607	4.552	0	65.809	65.023	0	4.999	4.503	4.128	71.419	64.324	58.965
PI3Kd_WT_apo	WTKEENQS	12	19	2	6	1.85	3.914	4.068	0	65.24	67.806	0	4.289	4.386	0	71.49	73.096	0	4.581	4.125	4.277	76.345	68.752	71.279
PI3Kd_WT_apo	WTKEENQSV	12	20	1	7	5.85	4.102	4.21	0	58.599	60.144	0	4.37	4.338	0	62.429	61.974	0	4.939	4.725	4.684	70.56	67.495	66.915
PI3Kd_WT_apo	WTKEENQSVV	12	21	2	8	8.05	3.774	3.778	0	47.179	47.23	0	4.494	4.095	0	56.172	51.189	0	5.365	4.974	5.168	67.06	62.179	64.594
PI3Kd_WT_apo	WTKEENQSVVVD	12	23	2	10	8.33	3.874	3.966	0	38.739	39.657	0	4.613	4.575	0	46.127	45.751	0	5.542	5.327	5.236	55.422	53.275	52.355
PI3Kd_WT_apo	VVDFLLPTGVY	21	31	1	8	21.11	0	-0.057	0	0	-0.718	0	0.504	0.572	0	6.296	7.151	0	0.82	0.834	0	10.253	10.424	0
PI3Kd_WT_apo	FLLPTGV	24	30	1	4	18.18	0.13	0.052	0	3.261	1.309	0	0.458	0.488	0	11.446	12.191	0	1.088	1.188	1.053	27.203	29.71	26.335
PI3Kd_WT_apo	FLLPTGVY	24	31	1	5	19.59	0.08	0.054	0	1.593	1.075	0	0.403	0.435	0	8.062	8.696	0	1.135	1.044	1.023	22.699	20.886	20.461
PI3Kd_WT_apo	YLNFPVSRNANL	31	42	2	9	15.63	1.768	1.922	0	19.642	21.359	0	3.071	3.073	0	34.126	34.147	0	3.246	3.178	3.195	36.066	35.313	35.497
PI3Kd_WT_apo	LNFPVSRNANL	32	42	2	8	13.59	1.206	1.399	0	15.075	17.485	0	2.491	2.47	0	31.134	30.877	0	2.704	2.662	2.592	33.802	33.276	32.403
PI3Kd_WT_apo	LNFPVSRNANLST	32	44	2	10	12.39	1.106	1.214	0	11.058	12.137	0	2.532	2.424	0	25.319	24.24	0	3.766	3.555	3.63	37.66	35.555	36.302
PI3Kd_WT_apo	PVSRNANL	35	42	2	6	4.51	1.381	1.602	0	23.016	26.703	0	2.906	2.87	0	48.426	47.841	0	3.222	3.102	3.066	53.701	51.704	51.096
PI3Kd_WT_apo	STIKQLL	43	49	2	5	13.27	0.044	0.014	0	0.875	0.283	0	0.019	0.017	0	0.374	0.332	0	0.058	0	0.015	1.151	0	0.304
PI3Kd_WT_apo	STIKQLLWHRAQYEPLF	43	59	3	14	18.36	0.568	0.553	0	4.058	3.951	0	1.496	1.439	0	10.684	10.281	0	2.721	2.643	2.593	19.434	18.876	18.519
PI3Kd_WT_apo	STIKQLLWHRAQYEPLFHMLSGPEA	43	67	3	21	19.44	2.478	2.769	0	11.8	13.186	0	5.19	5.171	0	24.712	24.625	0	6.901	6.776	6.965	32.861	32.265	33.165
PI3Kd_WT_apo	LLWHRAQYEPLF	48	59	2	9	18.7	0.585	0.53	0	6.504	5.893	0	1.537	1.547	0	17.076	17.19	0	2.326	2.41	2.414	25.848	26.777	26.82
PI3Kd_WT_apo	HMLSGPEA	60	67	2	5	6.4	1.322	1.47	0	26.44	29.397	0	2.301	2.32	0	46.012	46.394	0	2.979	2.83	2.786	59.586	56.597	55.727
PI3Kd_WT_apo	TCINQTAEQQEL	71	82	2	10	10.21	0.975	1.164	0	9.747	11.644	0	2.655	2.738	0	26.548	27.376	0	3.441	3.498	3.308	34.414	34.985	33.083
PI3Kd_WT_apo	TCINQTAEQQELEDEQRRLCDVQPFL	71	96	3	23	20.05	3.601	3.875	0	15.658	16.846	0	7.721	8.053	0	33.567	35.014	0	10.347	10.172	10.33	44.986	44.227	44.915
PI3Kd_WT_apo	EDEQRRLCDVQPFL	83	96	2	11	17.2	0.542	0.608	0	4.932	5.53	0	2.114	2.198	0	19.22	19.982	0	3.598	3.298	3.395	32.705	29.979	30.859
PI3Kd_WT_apo	EQRRLCDVQPFL	85	96	2	9	16.52	0.338	0.447	0	3.751	4.971	0	1.342	1.543	0	14.915	17.145	0	2.431	2.536	2.53	27.013	28.172	28.108
PI3Kd_WT_apo	QRRLCDVQPFLPVLRLV	86	102	3	13	9.83	0.28	0.264	0	2.157	2.034	0	1.108	1.037	0	8.524	7.975	0	2.19	1.974	1.684	16.844	15.186	12.956
PI3Kd_WT_apo	RRLCDVQPFLPVLRL	87	101	3	11	20.63	0	0.294	0	0	2.675	0	1.219	1.056	0	11.082	9.596	0	1.973	2.145	1.603	17.937	19.498	14.571
PI3Kd_WT_apo	VQPFLPVLRL	92	101	2	6	20.96	0.074	0.097	0	1.228	1.617	0	0.211	0.126	0	3.519	2.098	0	0.748	0.718	0.618	12.473	11.972	10.294
PI3Kd_WT_apo	RLVAREGDRVKKLINSQISLL	100	120	3	19	15.26	6.899	7.662	0	36.313	40.328	0	8.597	8.608	0	45.247	45.307	0	8.525	8.927	8.673	44.868	46.983	45.65
PI3Kd_WT_apo	VAREGDRVKKLINS	102	115	2	12	6.04	7.122	6.562	0	59.348	54.684	0	7.342	7.338	0	61.184	61.153	0	7.39	7.265	7.277	61.585	60.542	60.645
PI3Kd_WT_apo	VAREGDRVKKLINSQ	102	116	2	13	6.59	6.988	6.968	0	53.752	53.597	0	8.106	8.142	0	62.351	62.633	0	8.012	7.826	7.677	61.628	60.198	59.054
PI3Kd_WT_apo	VAREGDRVKKLINSQISL	102	119	3	16	12.72	5.943	6.284	0	37.146	39.276	0	7.508	7.398	0	46.926	46.237	0	7.283	8.024	7.447	45.52	50.15	46.547
PI3Kd_WT_apo	VAREGDRVKKLINSQISLL	102	120	2	17	15.69	6.351	6.605	0	37.358	38.851	0	7.341	7.248	0	43.184	42.636	0	7.303	7.347	7.842	42.96	43.218	46.128
PI3Kd_WT_apo	LIGKGLHE	120	127	2	6	5.27	0.552	0.578	0	9.195	9.639	0	1.11	1.066	0	18.494	17.761	0	2.489	2.362	2.28	41.476	39.365	37.994
PI3Kd_WT_apo	LIGKGLHEFDSL	120	131	2	10	15.17	0.726	0.808	0	7.258	8.078	0	2.462	2.508	0	24.619	25.076	0	3.132	3.129	2.748	31.317	31.289	27.481
PI3Kd_WT_apo	LIGKGLHEFDSLCDPEVND	120	138	3	16	17	1.93	1.904	0	12.063	11.901	0	3.534	3.984	0	22.084	24.898	0	5.348	5.11	4.791	33.426	31.937	29.943
PI3Kd_WT_apo	LIGKGLHEFDSLCDPEVNDF	120	139	3	17	19.29	1.771	1.874	0	10.415	11.022	0	4.064	3.596	0	23.907	21.155	0	4.769	4.747	4.348	28.051	27.926	25.577
PI3Kd_WT_apo	IGKGLHE	121	127	1	5	2.42	0.562	0.541	0	11.247	10.817	0	1.122	1.038	0	22.434	20.752	0	2.618	2.372	2.211	52.354	47.444	44.214
PI3Kd_WT_apo	IGKGLHEF	121	128	2	6	9.35	0.139	0.193	0	2.314	3.218	0	0.683	0.697	0	11.38	11.616	0	1.376	1.249	1.175	22.929	20.81	19.588
PI3Kd_WT_apo	IGKGLHEFDSL	121	131	2	9	13.9	0.786	0.71	0	8.73	7.89	0	2.193	2.304	0	24.362	25.601	0	2.77	2.676	2.993	30.779	29.734	33.251
PI3Kd_WT_apo	IGKGLHEFDSLCDPEVND	121	138	3	15	16.05	1.749	2.074	0	11.658	13.824	0	3.43	3.595	0	22.868	23.967	0	4.733	4.445	4.198	31.552	29.633	27.989
PI3Kd_WT_apo	GKGLHE	122	127	1	4	2.43	0.395	0.261	0	9.873	6.523	0	0.838	0.88	0	20.961	21.988	0	2.047	1.88	1.787	51.174	47.012	44.664
PI3Kd_WT_apo	FDSLCDPEVNDF	128	139	1	9	18.84	0.795	0.855	0	8.838	9.505	0	1.411	1.491	0	15.673	16.562	0	2.299	2.211	2.276	25.549	24.563	25.29
PI3Kd_WT_apo	CDPEVND	132	138	1	4	3.32	0.113	0.078	0	2.813	1.943	0	0.252	0.278	0	6.307	6.94	0	1.258	1.164	1.165	31.453	29.107	29.129
PI3Kd_WT_apo	CDPEVNDF	132	139	1	5	12.52	0.147	0.099	0	2.936	1.981	0	0.225	0.273	0	4.506	5.457	0	1.074	0.969	0.988	21.483	19.387	19.751
PI3Kd_WT_apo	PEVNDF	134	139	1	4	11.67	0.077	0.098	0	1.932	2.461	0	0.054	0.129	0	1.345	3.22	0	0.409	0.478	0.403	10.237	11.944	10.069
PI3Kd_WT_apo	FRAKMCQF	139	146	2	6	12.21	0.061	0.081	0	1.017	1.354	0	0.58	0.594	0	9.672	9.897	0	1.644	1.509	1.507	27.399	25.154	25.121
PI3Kd_WT_apo	FCEEAAARRQQLGWEAW	146	162	3	15	18.19	1.343	1.518	0	8.954	10.119	0	3.442	3.558	0	22.945	23.723	0	6.86	6.673	6.557	45.732	44.488	43.712
PI3Kd_WT_apo	CEEAAARRQQLGWEAW	147	162	3	14	17.4	1.285	1.456	0	9.179	10.4	0	3.317	3.394	0	23.694	24.242	0	6.494	6.26	6.121	46.387	44.711	43.722
PI3Kd_WT_apo	AAARRQQLGWEA	150	161	2	10	10.2	1.329	1.482	0	13.292	14.821	0	3.212	3.331	0	32.119	33.314	0	6.098	6.008	5.653	60.98	60.083	56.531
PI3Kd_WT_apo	AAARRQQLGWEAW	150	162	2	11	17.58	1.218	1.37	0	11.075	12.452	0	2.95	2.999	0	26.822	27.262	0	5.282	5.047	4.922	48.02	45.884	44.745
PI3Kd_WT_apo	AARRQQLGWEAW	151	162	2	10	17.67	1.151	1.239	0	11.514	12.389	0	2.781	2.843	0	27.81	28.433	0	4.829	4.505	4.301	48.287	45.046	43.007
PI3Kd_WT_apo	ARRQQLGWEAW	152	162	2	9	17.68	1.029	1.309	0	11.433	14.545	0	2.724	2.71	0	30.262	30.111	0	4.259	4.285	4.092	47.321	47.609	45.469
PI3Kd_WT_apo	WLQYSFPLQLEPSAQTWGPGTLRLPNRALL	162	191	3	24	20.95	9.442	9.701	0	39.34	40.42	0	11.295	11.546	0	47.061	48.108	0	14.067	13.637	13.754	58.612	56.821	57.308
PI3Kd_WT_apo	LQYSFPLQLEPSAQTWGPGTLRLPNRALL	163	191	3	23	20.63	10.13	10.301	0	44.045	44.789	0	11.936	12.018	0	51.894	52.251	0	14.452	14.236	14.424	62.834	61.896	62.711
PI3Kd_WT_apo	QYSFPLQLEPSAQTWGPGTLRLPNRALL	164	191	3	22	20.56	10.258	10.424	0	46.627	47.384	0	11.954	12.08	0	54.338	54.908	0	14.537	14.295	14.301	66.078	64.976	65.005
PI3Kd_WT_apo	PLQLEPSAQTWGPGTLRLPNRALL	168	191	3	19	19.42	10.505	10.744	0	55.29	56.55	0	12.224	12.084	0	64.335	63.597	0	13.822	13.583	13.384	72.748	71.487	70.442
PI3Kd_WT_apo	QTWGPGTLRLPNRALL	176	191	3	12	17.82	7.377	7.526	0	61.475	62.718	0	8.219	8.229	0	68.492	68.576	0	9.282	9.262	9.098	77.346	77.186	75.818
PI3Kd_WT_apo	WGPGTLRLPNRALL	178	191	3	10	17.91	5.201	5.455	0	52.009	54.553	0	6.277	6.156	0	62.768	61.561	0	0	7.12	7.106	0	71.201	71.057
PI3Kd_WT_apo	LRLPNRALL	183	191	2	6	13.54	2.876	2.968	0	47.929	49.471	0	3.795	3.888	0	63.244	64.795	0	4.629	0	4.486	77.156	0	74.763
PI3Kd_WT_apo	VNVKFEGSE	192	200	2	7	7.94	1.797	1.903	0	25.669	27.179	0	2.433	2.398	0	34.761	34.264	0	3.04	2.921	2.851	43.43	41.734	40.731
PI3Kd_WT_apo	VNVKFEGSEE	192	201	2	8	8.28	2.097	2.243	0	26.21	28.041	0	2.905	3.004	0	36.318	37.548	0	3.465	3.399	3.351	43.314	42.493	41.889
PI3Kd_WT_apo	VNVKFEGSEES	192	202	2	9	7.77	2.72	2.973	0	30.219	33.035	0	3.828	3.774	0	42.537	41.931	0	4.59	4.297	4.168	50.997	47.747	46.309
PI3Kd_WT_apo	VNVKFEGSEESF	192	203	2	10	13.52	0	3.053	0	0	30.532	0	3.873	3.942	0	38.732	39.417	0	0	4.51	4.275	0	45.1	42.747
PI3Kd_WT_apo	VNVKFEGSEESFT	192	204	2	11	12.71	3.35	3.659	0	30.456	33.259	0	4.525	4.484	0	41.133	40.764	0	5.004	4.98	4.872	45.49	45.269	44.294
PI3Kd_WT_apo	ESFTFQVSTKDVPLAL	201	216	2	13	19.84	2.028	2.161	0	15.596	16.621	0	3.739	3.8	0	28.765	29.233	0	4.563	4.44	4.338	35.099	34.151	33.37
PI3Kd_WT_apo	FTFQVSTKDVPLAL	203	216	2	11	19.61	1.222	1.359	0	11.108	12.35	0	2.912	2.964	0	26.475	26.948	0	3.732	3.653	3.548	33.924	33.209	32.253
PI3Kd_WT_apo	TFQVSTKDVPLAL	204	216	2	10	17.14	1.104	1.218	0	11.037	12.183	0	2.827	2.835	0	28.265	28.354	0	3.645	3.55	3.509	36.451	35.503	35.088
PI3Kd_WT_apo	FQVSTKDVPLAL	205	216	2	9	16.83	0.474	0.548	0	5.266	6.088	0	1.876	2.051	0	20.842	22.787	0	2.878	2.685	2.754	31.972	29.835	30.597
PI3Kd_WT_apo	FQVSTKDVPLALM	205	217	2	10	18.58	0.341	0.47	0	3.412	4.704	0	2.046	2.149	0	20.46	21.494	0	2.674	2.692	2.745	26.74	26.924	27.448
PI3Kd_WT_apo	QVSTKDVPLAL	206	216	2	8	14.06	0.523	0.69	0	6.537	8.622	0	2.236	2.106	0	27.953	26.327	0	2.907	2.849	2.659	36.338	35.611	33.236
PI3Kd_WT_apo	VSTKDVPLAL	207	216	2	7	13.9	0.386	0.368	0	5.514	5.258	0	1.502	1.507	0	21.463	21.526	0	2.222	2.06	1.996	31.742	29.435	28.516
PI3Kd_WT_apo	ACALRKKATV	218	227	2	8	1.75	0.677	1.603	0	8.469	20.042	0	3.376	3.118	0	42.195	38.979	0	4.158	4.075	4.134	51.971	50.943	51.676
PI3Kd_WT_apo	CALRKKATV	219	227	2	7	0.88	1.269	1.607	0	18.122	22.964	0	2.8	3.225	0	39.998	46.068	0	4.31	4.051	3.801	61.576	57.875	54.301
PI3Kd_WT_apo	CALRKKATVFRQPLVEQPED	219	238	3	16	8.43	6.031	6.367	0	37.694	39.794	0	8.303	8.089	0	51.891	50.554	0	9.179	8.887	8.872	57.367	55.545	55.45
PI3Kd_WT_apo	ALRKKATVFRQPLVEQPED	220	238	3	15	8.09	6.026	6.344	0	40.17	42.292	0	8.11	8.029	0	54.069	53.528	0	9.297	8.803	8.581	61.98	58.69	57.207
PI3Kd_WT_apo	LRKKATVFRQPLVEQPED	221	238	3	14	8.26	5.737	6.207	0	40.981	44.338	0	7.753	7.788	0	55.382	55.625	0	8.684	8.267	8.284	62.028	59.052	59.174
PI3Kd_WT_apo	RKKATVFRQPLVEQPED	222	238	3	13	7.68	5.745	6.151	0	44.194	47.316	0	7.72	7.649	0	59.387	58.835	0	8.265	8.231	7.956	63.575	63.313	61.198
PI3Kd_WT_apo	FRQPLVEQPED	228	238	2	7	9.34	3.714	3.707	0	53.055	52.958	0	4.647	4.762	0	66.381	68.024	0	5.371	5.239	5.117	76.726	74.839	73.104
PI3Kd_WT_apo	YTLQVNGRHEYL	239	250	2	10	12.58	0.298	0.309	0	2.983	3.091	0	0.366	0.32	0	3.657	3.199	0	0.462	0.395	0.376	4.617	3.951	3.755
PI3Kd_WT_apo	YTLQVNGRHEYLYGSY	239	254	3	14	14.1	0.936	1.005	0	6.688	7.176	0	1.105	1.119	0	7.891	7.996	0	1.563	1.519	1.583	11.162	10.851	11.31
PI3Kd_WT_apo	YTLQVNGRHEYLYGSYPLCQ	239	258	3	17	16.2	1.044	0.99	0	6.14	5.822	0	1.127	1.102	0	6.627	6.48	0	1.571	1.575	1.595	9.238	9.265	9.384
PI3Kd_WT_apo	YTLQVNGRHEYLYGSYPLCQF	239	259	2	18	19.94	0.942	0.958	0	5.234	5.322	0	1.028	0.964	0	5.712	5.358	0	1.385	1.44	0	7.697	7.999	0
PI3Kd_WT_apo	LQVNGRHEYL	241	250	2	8	12.69	0.285	0.418	0	3.563	5.221	0	0.48	0.467	0	6.003	5.838	0	0.495	0.491	0.206	6.187	6.141	2.575
PI3Kd_WT_apo	QVNGRHEYL	242	250	2	7	7.34	0.249	0.407	0	3.551	5.815	0	0.789	0.313	0	11.272	4.465	0	0	0.555	0.278	0	7.923	3.975
PI3Kd_WT_apo	QVNGRHEYLYGSYPLCQF	242	259	3	15	19.07	0.727	0.728	0	4.844	4.856	0	0.888	0.855	0	5.919	5.701	0	1.381	1.377	1.234	9.208	9.18	8.226
PI3Kd_WT_apo	YGSYPLCQ	251	258	1	5	13.44	0.471	0.473	0	9.419	9.466	0	0.548	0.526	0	10.958	10.52	0	0.52	0.489	0.455	10.399	9.782	9.107
PI3Kd_WT_apo	YGSYPLCQF	251	259	2	6	20.27	0.328	0.291	0	5.46	4.855	0	0.29	0.287	0	4.827	4.777	0	0.321	0.443	0.008	5.347	7.382	0.129
PI3Kd_WT_apo	FQYICS	259	264	1	4	13.32	0.648	0.691	0	16.21	17.285	0	0.906	0.936	0	22.651	23.402	0	0.999	0.97	1.035	24.971	24.241	25.878
PI3Kd_WT_apo	FQYICSCL	259	266	1	6	20.69	0.218	0.151	0	3.633	2.525	0	0.286	0.199	0	4.774	3.315	0	0	0.314	0	0	5.225	0
PI3Kd_WT_apo	QYICSCL	260	266	1	5	17.41	0.031	0.032	0	0.621	0.648	0	0.032	0.028	0	0.647	0.557	0	0.092	0.086	0.075	1.832	1.73	1.49
PI3Kd_WT_apo	CLHSGLTPHL	265	274	2	7	10.56	0.947	0.884	0	13.534	12.623	0	1.089	1.117	0	15.554	15.958	0	1.542	1.46	1.444	22.034	20.855	20.63
PI3Kd_WT_apo	CLHSGLTPHLTM	265	276	2	9	12.73	0.827	1.029	0	9.186	11.43	0	2.511	2.45	0	27.898	27.222	0	3.822	3.142	3.76	42.463	34.907	41.774
PI3Kd_WT_apo	CLHSGLTPHLTMVHSSSIL	265	283	3	16	14.19	0.597	0.697	0	3.733	4.357	0	0.658	0.743	0	4.113	4.641	0	0.787	0.732	0.752	4.92	4.578	4.703
PI3Kd_WT_apo	HSGLTPHL	267	274	2	5	8.4	0.835	0.846	0	16.692	16.92	0	1.039	1.041	0	20.789	20.813	0	0	1.373	1.355	0	27.455	27.091
PI3Kd_WT_apo	HSGLTPHLTMVHSSSIL	267	283	3	14	13.26	0.54	0.6	0	3.858	4.283	0	0.681	0.991	0	4.863	7.079	0	0.845	0.785	0.751	6.035	5.61	5.365
PI3Kd_WT_apo	HSGLTPHLTMVHSSSILA	267	284	3	15	12.55	0.618	0.645	0	4.117	4.3	0	0.677	0.606	0	4.511	4.039	0	1.065	0.911	0.951	7.099	6.071	6.341
PI3Kd_WT_apo	TMVHSSSIL	275	283	2	7	11.22	0.027	0.025	0	0.388	0.353	0	0.103	0.092	0	1.477	1.317	0	0.35	0.317	0.265	4.998	4.522	3.784
PI3Kd_WT_apo	VHSSSIL	277	283	1	5	8.93	0.181	0.2	0	3.617	4.006	0	0.276	0.266	0	5.52	5.318	0	0.417	0.422	0.33	8.346	8.432	6.604
PI3Kd_WT_apo	RDEQSNPAPQVQKPRAKPPPIPAKKPSSVSL	286	316	5	21	6.6	13.627	13.98	0	64.892	66.572	0	14.274	14.079	0	67.974	67.044	0	14.396	13.887	14.208	68.551	66.13	67.656
PI3Kd_WT_apo	PQVQKPRAKPPPIPAKKPSSVSL	294	316	4	15	6.83	11.364	11.962	0	75.761	79.748	0	11.769	11.617	0	78.457	77.448	0	11.461	11.493	11.214	76.404	76.622	74.758
PI3Kd_WT_apo	WSLEQPFRIEL	317	327	2	8	21.01	0.669	0.779	0	8.358	9.734	0	1.212	1.203	0	15.151	15.038	0	1.829	1.843	2.789	22.858	23.039	34.867
PI3Kd_WT_apo	IQGSKVNADE	328	337	2	8	2.02	0.691	0.781	0	8.636	9.761	0	2.288	2.408	0	28.601	30.105	0	3.881	3.538	3.621	48.517	44.227	45.267
PI3Kd_WT_apo	FDYKDQLKTGERCL	426	439	3	12	12.94	1.692	1.936	0	14.101	16.132	0	3.13	3.23	0	26.084	26.914	0	3.925	3.889	3.802	32.707	32.409	31.686
PI3Kd_WT_apo	YKDQLKTGERC	428	438	3	9	3.77	3.037	3.192	0	33.749	35.465	0	4.183	4.106	0	46.479	45.627	0	4.899	4.651	4.598	54.435	51.683	51.091
PI3Kd_WT_apo	LNPTGTVRSNPNTDSAAAL	453	471	2	15	9.32	3.576	3.783	0	23.839	25.219	0	6.313	5.942	0	42.089	39.61	0	8.488	8.246	7.951	56.59	54.975	53.006
PI3Kd_WT_apo	ICLPEVAPHPVYY	473	485	2	8	17.07	3.502	3.388	0	43.78	42.347	0	4.604	4.377	0	57.546	54.708	0	5.373	5.473	5.286	67.166	68.413	66.069
PI3Kd_WT_apo	ICLPEVAPHPVYYPAL	473	488	2	10	18.9	2.529	2.66	0	25.288	26.596	0	3.756	3.921	0	37.562	39.206	0	4.514	5.048	5.04	45.139	50.48	50.404
PI3Kd_WT_apo	PEVAPHPVYYPAL	476	488	2	8	15.6	0.797	1.107	0	9.957	13.836	0	2.212	1.939	0	27.646	24.235	0	2.144	2.057	2.619	26.804	25.713	32.734
PI3Kd_WT_apo	EKILEL	489	494	1	4	14.67	0.058	0.009	0	1.456	0.229	0	0.079	0.133	0	1.972	3.318	0	0.704	0.616	0.631	17.6	15.402	15.764
PI3Kd_WT_apo	EKILELGRHSE	489	499	3	9	7.81	0.267	0.261	0	2.967	2.895	0	0.718	0.673	0	7.979	7.482	0	1.671	1.566	1.493	18.571	17.399	16.591
PI3Kd_WT_apo	EKILELGRHSEC	489	500	2	10	8.68	0.732	0.759	0	7.322	7.589	0	1.197	1.135	0	11.966	11.351	0	2.073	1.985	1.85	20.729	19.854	18.504
PI3Kd_WT_apo	EKILELGRHSECVHVTE	489	505	2	15	9.61	2.574	2.611	0	17.161	17.404	0	3.13	2.995	0	20.869	19.966	0	4.361	4.166	4.126	29.071	27.775	27.504
PI3Kd_WT_apo	EKILELGRHSECVHVTEE	489	506	2	16	9.66	2.58	2.784	0	16.126	17.403	0	3.331	3.19	0	20.816	19.938	0	4.58	4.318	4.328	28.623	26.991	27.048
PI3Kd_WT_apo	EKILELGRHSECVHVTEEEQ	489	508	3	18	9.56	2.846	3.054	0	15.813	16.965	0	3.775	3.523	0	20.971	19.575	0	5.26	5.066	5	29.223	28.145	27.778
PI3Kd_WT_apo	KILELGRHSEC	490	500	2	9	7.53	0.525	0.555	0	5.836	6.163	0	0.798	0.71	0	8.862	7.886	0	1.753	1.593	1.5	19.473	17.695	16.662
PI3Kd_WT_apo	LGRHSECVHVTE	494	505	3	10	4.19	2.661	2.765	0	26.611	27.646	0	3.102	2.955	0	31.019	29.549	0	3.681	3.45	3.422	36.812	34.504	34.219
PI3Kd_WT_apo	LGRHSECVHVTEE	494	506	3	11	4.35	2.876	3.032	0	26.147	27.566	0	3.421	3.271	0	31.096	29.737	0	3.955	3.754	3.735	35.954	34.128	33.955
PI3Kd_WT_apo	LGRHSECVHVTEEEQ	494	508	3	13	4.52	2.911	3.007	0	22.389	23.128	0	3.483	3.332	0	26.794	25.634	0	4.602	4.43	4.263	35.401	34.078	32.792
PI3Kd_WT_apo	GRHSECVHVTEE	495	506	3	10	3.31	3.073	3.287	0	30.733	32.869	0	3.542	3.402	0	35.415	34.022	0	3.975	3.792	4.2	39.749	37.924	42.005
PI3Kd_WT_apo	CVHVTEEEQ	500	508	2	7	3.78	2.01	2.199	0	28.716	31.415	0	2.632	2.615	0	37.604	37.353	0	3.975	3.693	3.673	56.79	52.754	52.468
PI3Kd_WT_apo	VHVTEE	501	506	1	4	2.22	1.847	1.866	0	46.165	46.64	0	2.257	2.143	0	56.423	53.584	0	2.823	2.703	2.595	70.575	67.585	64.867
PI3Kd_WT_apo	VHVTEEEQ	501	508	1	6	2.54	1.669	1.851	0	27.815	30.851	0	2.307	2.236	0	38.447	37.275	0	3.625	3.398	3.372	60.414	56.633	56.194
PI3Kd_WT_apo	VHVTEEEQLQL	501	511	2	9	13.45	1.096	1.233	0	12.176	13.697	0	1.722	1.654	0	19.136	18.373	0	4.274	4.103	4.111	47.491	45.593	45.675
PI3Kd_WT_apo	REILERRGSGEL	512	523	2	10	7.32	2.583	2.737	0	25.834	27.373	0	3.231	2.987	0	32.307	29.87	0	3.294	3.112	2.957	32.935	31.117	29.572
PI3Kd_WT_apo	YEHEKDLVWKLRHEVQEHFPEALARL	524	549	4	23	18.97	0.813	0.72	0	3.534	3.129	0	1.643	2.211	0	7.142	9.615	0	2.476	2.275	2.098	10.767	9.89	9.12
PI3Kd_WT_apo	HEKDLVWKLRHEVQEHFPEAL	526	546	4	18	17.61	0.602	0.422	0	3.345	2.344	0	1.311	1.39	0	7.281	7.723	0	2.049	1.975	2.064	11.384	10.973	11.467
PI3Kd_WT_apo	LLVTKWNKHEDVAQM	550	564	2	13	11.35	0.096	0.092	0	0.742	0.706	0	0.528	0.522	0	4.062	4.018	0	0.775	0.718	0	5.958	5.523	0
PI3Kd_WT_apo	LLVTKWNKHEDVAQML	550	565	3	14	15.35	-0.017	-0.015	0	-0.124	-0.108	0	0.205	0.16	0	1.466	1.14	0	0.369	0.255	0.301	2.638	1.825	2.151
PI3Kd_WT_apo	CSWPEL	569	574	1	3	19.09	0.02	-0.043	0	0.661	-1.447	0	0.485	0.638	0	16.155	21.263	0	1.232	1.16	1.106	41.069	38.683	36.882
PI3Kd_WT_apo	LDFSFPDCHVGSF	583	595	2	10	20.72	0.579	0.585	0	5.788	5.853	0	1.637	1.719	0	16.372	17.19	0	3.32	3.107	3.408	33.202	31.074	34.084
PI3Kd_WT_apo	FSFPDCHVGSF	585	595	2	8	19.41	0.335	0.3	0	4.185	3.751	0	0.871	1.049	0	10.89	13.117	0	2.12	1.938	1.923	26.506	24.229	24.043
PI3Kd_WT_apo	AIKSLRKLTDDEL	596	608	2	11	11.26	1.009	0.932	0	9.176	8.474	0	1.214	1.239	0	11.035	11.264	0	1.764	1.675	1.612	16.034	15.226	14.659
PI3Kd_WT_apo	FQYLLQ	609	614	1	4	16.86	0.023	0.013	0	0.571	0.314	0	0.058	0.027	0	1.45	0.674	0	0.042	0.025	0.078	1.055	0.629	1.959
PI3Kd_WT_apo	LVQVLKYESYL	615	625	2	9	18.4	1.032	1.112	0	11.472	12.355	0	1.916	1.946	0	21.29	21.62	0	2.625	2.489	2.565	29.17	27.658	28.501
PI3Kd_WT_apo	VQVLKYESY	616	624	2	7	11.98	0.911	1.066	0	13.01	15.226	0	1.785	1.652	0	25.497	23.593	0	1.741	1.785	1.719	24.865	25.497	24.558
PI3Kd_WT_apo	VQVLKYESYL	616	625	2	8	16.62	0.98	1.08	0	12.253	13.499	0	1.834	1.876	0	22.926	23.451	0	2.507	2.336	2.417	31.339	29.196	30.215
PI3Kd_WT_apo	VQVLKYESYLDC	616	627	2	10	16.74	0.833	0.894	0	8.335	8.935	0	1.728	1.821	0	17.282	18.213	0	2.98	3.276	2.896	29.804	32.761	28.955
PI3Kd_WT_apo	ELTKFLL	628	634	2	5	18.5	-0.052	-0.028	0	-1.03	-0.568	0	-0.022	-0.007	0	-0.443	-0.14	0	-0.007	0.009	0.028	-0.143	0.173	0.554
PI3Kd_WT_apo	ELTKFLLDRALANRKIGHFL	628	647	3	18	16.98	0.017	0.005	0	0.094	0.03	0	0.156	0.21	0	0.867	1.168	0	0.298	0.287	0.203	1.658	1.592	1.129
PI3Kd_WT_apo	LTKFLLDRALANRKIGHF	629	646	3	16	13.71	0.128	0.153	0	0.801	0.954	0	0.429	0.269	0	2.683	1.68	0	0.211	0.251	0.143	1.316	1.571	0.893
PI3Kd_WT_apo	TKFLLD	630	635	1	4	13.76	-0.022	0.019	0	-0.551	0.483	0	0	-0.058	0	0	-1.458	0	-0.021	0.034	-0.051	-0.524	0.853	-1.266
PI3Kd_WT_apo	TKFLLDRALANRKIGHF	630	646	3	15	13.14	0.174	0.111	0	1.163	0.74	0	0.257	0.122	0	1.711	0.815	0	0.471	0.312	0.396	3.139	2.078	2.641
PI3Kd_WT_apo	TKFLLDRALANRKIGHFL	630	647	3	16	15.42	0	0.144	0	0	0.9	0	0.333	0.25	0	2.081	1.563	0	0.202	0.243	0.141	1.262	1.517	0.879
PI3Kd_WT_apo	LLDRALANRKIGHF	633	646	3	12	10.44	0	0.058	0	0	0.483	0	0.317	0.213	0	2.638	1.774	0	0.499	0.454	0.482	4.156	3.783	4.019
PI3Kd_WT_apo	LLDRALANRKIGHFL	633	647	2	13	13.01	0.083	0.081	0	0.641	0.622	0	0.188	0.092	0	1.445	0.711	0	0.224	0.138	0.165	1.724	1.064	1.269
PI3Kd_WT_apo	LLDRALANRKIGHFLFWHL	633	651	4	17	18.75	0.138	0	0	0.812	0	0	0	0.021	0	0	0.125	0	0.128	0.117	0.127	0.755	0.686	0.748
PI3Kd_WT_apo	DRALANRKIGHF	635	646	3	10	7.15	0.146	0.066	0	1.458	0.657	0	0.24	0.226	0	2.402	2.264	0	0.536	0.568	0.404	5.356	5.685	4.04
PI3Kd_WT_apo	RALANRKIGHF	636	646	2	9	5.67	0.108	0.007	0	1.204	0.083	0	0.256	0.16	0	2.849	1.776	0	0.52	0.37	0.275	5.781	4.109	3.058
PI3Kd_WT_apo	LFWHLRSEM	647	655	2	7	17.01	0.069	0.047	0	0.982	0.67	0	0.167	0.323	0	2.384	4.608	0	0.032	0.044	-0.006	0.452	0.623	-0.092
PI3Kd_WT_apo	FWHLRSEM	648	655	2	6	14.83	-0.11	-0.173	0	-1.832	-2.892	0	-0.167	-0.118	0	-2.784	-1.973	0	-0.154	-0.169	-0.177	-2.567	-2.819	-2.95
PI3Kd_WT_apo	RSEMHVPSVA	652	661	2	7	8.26	0.966	1.054	0	13.806	15.056	0	1.049	1.109	0	14.985	15.84	0	1.276	1.337	1.208	18.23	19.101	17.262
PI3Kd_WT_apo	HVPSVA	656	661	1	3	3.15	0.781	0.826	0	26.04	27.534	0	0.851	0.86	0	28.373	28.659	0	1.185	1.119	1.092	39.489	37.291	36.413
PI3Kd_WT_apo	LRFGLIL	662	668	2	5	20.81	0.084	0.01	0	1.68	0.193	0	0.033	0.02	0	0.664	0.395	0	0.057	0.018	0.008	1.137	0.361	0.168
PI3Kd_WT_apo	LRFGLILE	662	669	2	6	19.96	0.036	0.024	0	0.594	0.408	0	0.032	0.034	0	0.531	0.564	0	0.046	0.026	-0.033	0.768	0.432	-0.555
PI3Kd_WT_apo	LRFGLILEA	662	670	2	7	20.34	0.098	0.045	0	1.395	0.648	0	0.06	0.023	0	0.852	0.324	0	0.044	0.032	0.033	0.623	0.461	0.471
PI3Kd_WT_apo	RFGLIL	663	668	1	4	19.79	0.025	-0.002	0	0.624	-0.061	0	-0.015	0.009	0	-0.386	0.233	0	-0.021	-0.039	0.028	-0.523	-0.966	0.702
PI3Kd_WT_apo	EAYCRGSTHHMKVL	669	682	3	12	6.03	0.119	0	0	0.995	0	0	0.588	0	0	4.899	0	0	0.882	0.961	0.902	7.35	8.005	7.516
PI3Kd_WT_apo	YCRGSTHHMKVLM	671	683	3	11	6.5	-0.005	0.392	0	-0.046	3.565	0	0.432	0.152	0	3.927	1.384	0	0.997	1.023	0.935	9.059	9.298	8.499
PI3Kd_WT_apo	MKQGEALSKL	683	692	2	8	9.19	0.3	0.292	0	3.754	3.654	0	0.141	0.406	0	1.764	5.079	0	0.512	0.44	0.383	6.397	5.495	4.783
PI3Kd_WT_apo	KQGEALSKL	684	692	2	7	7.58	0.074	0.026	0	1.059	0.377	0	0.055	0.08	0	0.783	1.141	0	0.393	0.281	0.329	5.617	4.016	4.693
PI3Kd_WT_apo	KQGEALSKLKALND	684	697	3	12	8.77	0.194	0.132	0	1.616	1.101	0	0.192	0.216	0	1.603	1.797	0	0.495	0.346	0.38	4.123	2.884	3.166
PI3Kd_WT_apo	LSKLKALND	689	697	2	7	6.54	0.161	0.111	0	2.307	1.585	0	0.162	0.138	0	2.314	1.978	0	0.176	0.097	0.134	2.519	1.387	1.908
PI3Kd_WT_apo	SKLKALND	690	697	2	6	3.65	0.074	0.073	0	1.232	1.225	0	0.087	0.091	0	1.449	1.522	0	0.125	0.093	0.099	2.082	1.556	1.653
PI3Kd_WT_apo	SKLKALNDF	690	698	2	7	11.81	0.143	0.071	0	2.039	1.02	0	0.068	0.077	0	0.973	1.095	0	0.069	0.016	0.063	0.981	0.234	0.896
PI3Kd_WT_apo	FVKLSSQKTPKPQTKE	698	713	2	12	4.11	2.602	2.827	0	21.686	23.561	0	4.766	4.593	0	39.719	38.276	0	5.791	5.554	5.681	48.255	46.283	47.342
PI3Kd_WT_apo	FVKLSSQKTPKPQTKE	698	713	3	12	4.11	2.504	2.728	0	20.863	22.732	0	4.786	4.53	0	39.886	37.754	0	0	5.57	5.625	0	46.421	46.877
PI3Kd_WT_apo	FVKLSSQKTPKPQTKELMHL	698	717	4	16	9.92	1.615	1.653	0	10.095	10.333	0	2.812	2.591	0	17.573	16.192	0	3.516	3.331	3.294	21.977	20.819	20.587
PI3Kd_WT_apo	FVKLSSQKTPKPQTKELMHLCM	698	719	3	18	12.79	1.48	1.574	0	8.22	8.744	0	2.415	2.408	0	13.415	13.379	0	3.129	2.853	2.764	17.385	15.85	15.355
PI3Kd_WT_apo	VKLSSQKTPKPQTKE	699	713	3	11	1.8	2.663	2.93	0	24.205	26.634	0	5.06	4.96	0	45.998	45.095	0	6.392	6.071	6.115	58.106	55.191	55.588
PI3Kd_WT_apo	VKLSSQKTPKPQTKE	699	713	4	11	1.8	2.623	2.89	0	23.846	26.27	0	5.203	4.982	0	47.303	45.292	0	6.395	6.163	6.117	58.136	56.03	55.611
PI3Kd_WT_apo	RQEAYL	720	725	1	4	9.21	1.332	1.389	0	33.301	34.715	0	1.573	1.565	0	39.324	39.133	0	2.526	2.428	2.396	63.155	60.698	59.889
PI3Kd_WT_apo	RQEAYLEA	720	727	2	6	8.96	1.399	1.533	0	23.324	25.554	0	2.726	2.702	0	45.427	45.039	0	3.946	3.819	3.803	65.76	63.643	63.382
PI3Kd_WT_apo	EALSHLQSPLDPSTL	726	740	2	11	15.63	0.281	0.261	0	2.551	2.37	0	1.034	1.136	0	9.397	10.332	0	2.564	2.515	2.481	23.313	22.866	22.559
PI3Kd_WT_apo	EALSHLQSPLDPSTLL	726	741	2	12	18.61	0.364	0.206	0	3.03	1.719	0	1.001	1.133	0	8.341	9.441	0	2.564	2.511	2.485	21.371	20.929	20.711
PI3Kd_WT_apo	LSHLQSPLDPSTL	728	740	2	9	14.61	0.26	0.258	0	2.889	2.864	0	1.043	1.141	0	11.589	12.676	0	2.6	2.523	2.506	28.89	28.036	27.841
PI3Kd_WT_apo	LSHLQSPLDPSTLL	728	741	2	10	18.16	0.241	0.232	0	2.413	2.317	0	1.014	1.121	0	10.145	11.21	0	2.596	2.537	2.519	25.959	25.375	25.19
PI3Kd_WT_apo	LAEVCVE	741	747	1	5	9.97	0.999	1.125	0	19.973	22.492	0	1.747	1.763	0	34.94	35.265	0	2.012	1.893	1.845	40.239	37.854	36.898
PI3Kd_WT_apo	VCVEQCTF	744	751	1	6	15.13	1.032	1.252	0	17.192	20.862	0	2.173	2.232	0	36.21	37.201	0	2.998	3.007	2.811	49.959	50.12	46.855
PI3Kd_WT_apo	MDSKMKPLW	752	760	2	6	15.04	0.932	0.965	0	15.534	16.089	0	1.056	1.072	0	17.606	17.861	0	1.233	1.151	1.108	20.543	19.183	18.46
PI3Kd_WT_apo	MDSKMKPLWIM	752	762	2	8	19.31	0.801	0.831	0	10.013	10.383	0	0.796	0.816	0	9.944	10.199	0	1.022	0.961	0.863	12.781	12.012	10.787
PI3Kd_WT_apo	DSKMKPLW	753	760	2	5	14.85	0.79	0.863	0	15.793	17.257	0	0.864	0.846	0	17.29	16.918	0	1.054	0.996	0.998	21.074	19.915	19.953
PI3Kd_WT_apo	DSKMKPLWIM	753	762	3	7	19.37	0.685	0.708	0	9.789	10.111	0	0.74	0.62	0	10.578	8.851	0	0.916	0.952	0.8	13.091	13.593	11.434
PI3Kd_WT_apo	IMYSNE	761	766	1	4	6.46	1.238	1.395	0	30.94	34.88	0	1.595	1.543	0	39.872	38.587	0	2.15	2.1	2.066	53.753	52.494	51.639
PI3Kd_WT_apo	YSNEEAGSGGSVGIIFKNGDDLRQDM	763	788	3	24	16.81	3.957	4.078	0	16.489	16.992	0	6.136	5.866	0	25.567	24.443	0	7.672	6.947	7.487	31.966	28.946	31.197
PI3Kd_WT_apo	EAGSGGSVGIIFKNGDDL	767	784	2	16	16.49	1.905	1.979	0	11.906	12.37	0	2.796	2.612	0	17.474	16.324	0	3.388	3.191	3.183	21.177	19.946	19.892
PI3Kd_WT_apo	EAGSGGSVGIIFKNGDDLRQDM	767	788	2	20	16.38	1.896	2.277	0	9.481	11.387	0	4.437	4.256	0	22.186	21.278	0	6.042	5.767	5.793	30.209	28.834	28.966
PI3Kd_WT_apo	EAGSGGSVGIIFKNGDDLRQDMLT	767	790	3	22	17.66	2.13	2.43	0	9.681	11.046	0	3.894	3.932	0	17.7	17.871	0	5.677	5.513	5.786	25.804	25.059	26.298
PI3Kd_WT_apo	MDVLWKQEGLD	797	807	2	9	16.19	0.077	0.111	0	0.852	1.239	0	0.338	0.352	0	3.753	3.913	0	0	0.884	0.904	0	9.819	10.041
PI3Kd_WT_apo	MDVLWKQEGLDL	797	808	2	10	19.55	0.065	0.062	0	0.648	0.616	0	0.235	0.253	0	2.35	2.534	0	0.749	0.719	0.737	7.49	7.191	7.373
PI3Kd_WT_apo	DVLWKQEGLDL	798	808	2	9	18.63	-0.004	-0.007	0	-0.049	-0.074	0	0.228	0.232	0	2.532	2.578	0	0.841	0.804	0.753	9.349	8.931	8.368
PI3Kd_WT_apo	VLWKQEGLDL	799	808	2	8	17.63	0.098	0.092	0	1.224	1.152	0	0.282	0.312	0	3.525	3.902	0	0.873	0.823	0.785	10.918	10.286	9.817
PI3Kd_WT_apo	WKQEGLD	801	807	2	5	8.15	0.081	0.061	0	1.624	1.23	0	0.362	0.361	0	7.233	7.223	0	1.222	1.151	1.146	24.442	23.021	22.92
PI3Kd_WT_apo	WKQEGLDL	801	808	2	6	14.9	0.061	0.033	0	1.009	0.545	0	0.273	0.262	0	4.553	4.368	0	0.881	0.838	0.799	14.689	13.959	13.313
PI3Kd_WT_apo	LRMTPYGCLPTGDRTGL	808	824	3	13	15.28	0.43	0.546	0	3.306	4.198	0	0.631	0.54	0	4.853	4.156	0	0.993	0.884	0.936	7.635	6.799	7.199
PI3Kd_WT_apo	LRMTPYGCLPTGDRTGLIE	808	826	3	15	16	0.474	0.436	0	3.16	2.908	0	0.537	0.606	0	3.577	4.039	0	0.962	0.957	0.882	6.413	6.381	5.883
PI3Kd_WT_apo	RMTPYGCLPTGDRTGL	809	824	3	12	13.91	0.498	0.431	0	4.148	3.592	0	0.597	0	0	4.977	0	0	0.976	0.89	0.896	8.131	7.414	7.466
PI3Kd_WT_apo	RMTPYGCLPTGDRTGLIE	809	826	3	14	14.7	0.493	0.486	0	3.52	3.473	0	0.639	0.596	0	4.566	4.257	0	1.062	0.942	0.937	7.583	6.726	6.696
PI3Kd_WT_apo	TPYGCLPTGDRTGLIE	811	826	2	13	14.73	0.719	0.659	0	5.534	5.071	0	1.04	0.886	0	8.001	6.815	0	1.193	1.147	1.055	9.173	8.822	8.119
PI3Kd_WT_apo	VVLRSDTIA	827	835	1	7	8.22	1.104	1.11	0	15.767	15.859	0	1.955	1.964	0	27.928	28.053	0	2.45	2.358	2.344	35.002	33.687	33.484
PI3Kd_WT_apo	VVLRSDTIA	827	835	2	7	8.22	1.101	1.175	0	15.736	16.792	0	1.91	1.941	0	27.291	27.729	0	2.375	2.291	2.258	33.923	32.734	32.263
PI3Kd_WT_apo	VVLRSDTIAN	827	836	1	8	6.94	1.214	1.242	0	15.173	15.522	0	2.04	2.083	0	25.501	26.04	0	2.662	2.592	2.548	33.275	32.401	31.855
PI3Kd_WT_apo	VVLRSDTIAN	827	836	2	8	6.94	1.171	1.196	0	14.641	14.946	0	2.012	2.078	0	25.15	25.97	0	2.68	2.557	2.559	33.501	31.965	31.989
PI3Kd_WT_apo	VVLRSDTIANIQL	827	839	2	11	16.8	1.079	1.193	0	9.806	10.841	0	2.175	2.196	0	19.772	19.962	0	3.539	3.382	3.465	32.169	30.745	31.497
PI3Kd_WT_apo	VLRSDTIANIQL	828	839	2	10	16.35	0.058	0.177	0	0.578	1.768	0	0.645	0.645	0	6.446	6.453	0	2.07	2.026	2.328	20.705	20.262	23.28
PI3Kd_WT_apo	RSDTIANIQL	830	839	2	8	15.21	0.13	0.122	0	1.623	1.531	0	0.548	0.592	0	6.848	7.398	0	1.697	1.626	1.621	21.214	20.322	20.258
PI3Kd_WT_apo	IANIQL	834	839	1	4	14.45	0.092	0.072	0	2.307	1.803	0	0.453	0.479	0	11.327	11.974	0	1.531	1.426	1.501	38.263	35.657	37.526
PI3Kd_WT_apo	AATAAFNKDAL	845	855	2	9	10.88	5.716	5.955	0	63.508	66.172	0	7.163	7.236	0	79.586	80.405	0	7.381	7.197	7.013	82.009	79.965	77.926
PI3Kd_WT_apo	AATAAFNKDALL	845	856	2	10	14.33	5.266	5.572	0	52.657	55.724	0	6.745	6.801	0	67.452	68.007	0	6.908	6.756	6.363	69.085	67.56	63.627
PI3Kd_WT_apo	AATAAFNKDALLNWLKSKNPGEAL	845	868	4	21	19.18	6.193	6.555	0	29.491	31.214	0	9.713	9.647	0	46.253	45.94	0	11.099	10.92	10.828	52.854	52	51.563
PI3Kd_WT_apo	FNKDALL	850	856	2	5	12.91	1.377	1.545	0	27.538	30.899	0	2.723	2.701	0	54.47	54.02	0	2.797	2.702	2.537	55.945	54.037	50.75
PI3Kd_WT_apo	FNKDALLNWLKSKNPGEAL	850	868	3	16	18.94	3.521	3.837	0	22.006	23.981	0	6.712	6.796	0	41.948	42.477	0	8.111	8.09	7.885	50.696	50.56	49.282
PI3Kd_WT_apo	FNKDALLNWLKSKNPGEALDRAIEE	850	874	4	22	19.72	3.559	4.087	0	16.179	18.576	0	7.789	8.161	0	35.406	37.096	0	9.287	9.399	9.11	42.214	42.723	41.41
PI3Kd_WT_apo	NKDALL	851	856	1	4	9.27	0.658	0.811	0	16.459	20.267	0	1.854	1.815	0	46.358	45.375	0	2.022	1.962	1.913	50.56	49.039	47.814
PI3Kd_WT_apo	NKDALLNWLKSKNPGEAL	851	868	3	15	17.73	2.854	3.04	0	19.027	20.268	0	5.579	5.668	0	37.191	37.784	0	7.022	6.87	6.789	46.816	45.798	45.26
PI3Kd_WT_apo	NKDALLNWLKSKNPGEALDRAIEE	851	874	4	21	18.6	2.966	3.46	0	14.124	16.477	0	6.963	7.094	0	33.156	33.782	0	8.423	8.436	8.616	40.11	40.172	41.027
PI3Kd_WT_apo	LNWLKSKNPGEAL	856	868	3	10	14.14	2.173	2.266	0	21.734	22.656	0	3.712	3.752	0	37.121	37.523	0	4.19	4.089	3.955	41.905	40.894	39.555
PI3Kd_WT_apo	LNWLKSKNPGEALDRAIEE	856	874	3	16	15.5	2.415	2.596	0	15.097	16.225	0	4.973	4.92	0	31.082	30.749	0	5.331	5.322	5.172	33.318	33.263	32.325
PI3Kd_WT_apo	NWLKSKNPGEAL	857	868	2	9	12.34	2.212	2.361	0	24.575	26.233	0	3.751	3.702	0	41.683	41.137	0	4.083	4.026	3.897	45.368	44.732	43.306
PI3Kd_WT_apo	NWLKSKNPGEALDRA	857	871	3	12	10.8	2.45	2.676	0	20.421	22.299	0	4.945	4.959	0	41.206	41.324	0	5.483	5.371	5.368	45.695	44.756	44.734
PI3Kd_WT_apo	NWLKSKNPGEALDRAIEE	857	874	3	15	14.28	2.249	2.617	0	14.995	17.446	0	5.121	5.458	0	34.139	36.386	0	5.666	5.061	5.426	37.772	33.741	36.175
PI3Kd_WT_apo	DRAIEE	869	874	1	4	2.61	0.017	-0.004	0	0.43	-0.092	0	0.004	0.003	0	0.098	0.067	0	0.075	0.016	0.007	1.885	0.392	0.173
PI3Kd_WT_apo	DRAIEEF	869	875	2	5	11.84	0.011	-0.027	0	0.224	-0.537	0	-0.002	0.001	0	-0.042	0.028	0	0.033	0.028	0.011	0.664	0.569	0.215
PI3Kd_WT_apo	FTLSCAG	875	881	1	5	13.22	0.03	0.012	0	0.593	0.241	0	0.007	0.018	0	0.144	0.367	0	0.023	0.011	0.02	0.451	0.224	0.391
PI3Kd_WT_apo	FTLSCAGY	875	882	1	6	17.1	-0.017	-0.03	0	-0.283	-0.508	0	-0.025	-0.022	0	-0.409	-0.373	0	-0.02	-0.036	-0.049	-0.334	-0.601	-0.82
PI3Kd_WT_apo	TLSCAG	876	881	1	4	4.44	0.101	0.126	0	2.531	3.142	0	0.092	0.186	0	2.309	4.662	0	0.03	0.186	0.056	0.75	4.65	1.409
PI3Kd_WT_apo	TYVLGIGDRHSDN	886	898	2	11	10.73	0.408	0.391	0	3.71	3.552	0	0.853	0.914	0	7.756	8.305	0	1.389	1.395	1.245	12.632	12.681	11.323
PI3Kd_WT_apo	YVLGIGDRHSDN	887	898	3	10	9.91	0.284	0.315	0	2.84	3.147	0	0.898	0.796	0	8.977	7.958	0	1.273	1.261	1.099	12.726	12.606	10.988
PI3Kd_WT_apo	YVLGIGDRHSDNIM	887	900	3	12	14.35	0.142	0.173	0	1.185	1.442	0	0.533	0.511	0	4.443	4.258	0	0.864	0.801	0.79	7.201	6.675	6.579
PI3Kd_WT_apo	IRESGQL	901	907	2	5	5.43	0.089	0.086	0	1.789	1.714	0	0.378	0.389	0	7.554	7.77	0	1.005	0.928	0.925	20.095	18.566	18.502
PI3Kd_WT_apo	IRESGQLFHIDF	901	912	3	10	19.1	0.112	0.077	0	1.123	0.765	0	0.159	0.157	0	1.587	1.57	0	0.402	0.332	0.315	4.019	3.315	3.155
PI3Kd_WT_apo	IRESGQLFHIDFGHF	901	915	3	13	19.25	0.348	0.395	0	2.677	3.038	0	1.084	1.045	0	8.342	8.039	0	1.372	1.275	1.212	10.556	9.804	9.324
PI3Kd_WT_apo	IRESGQLFHIDFGHFLGNF	901	919	4	17	20.78	1.455	1.566	0	8.556	9.214	0	3.369	3.473	0	19.821	20.432	0	4.214	4.18	4.183	24.789	24.587	24.607
PI3Kd_WT_apo	FHIDFGHF	908	915	1	6	18.5	0.315	0.335	0	5.249	5.582	0	1.064	1.014	0	17.741	16.894	0	1.33	1.287	1.095	22.159	21.444	18.248
PI3Kd_WT_apo	FHIDFGHFLGNF	908	919	3	10	20.9	1.291	1.406	0	12.914	14.059	0	3.224	3.26	0	32.241	32.604	0	4.077	3.99	3.838	40.774	39.897	38.383
PI3Kd_WT_apo	HIDFGHF	909	915	2	5	14.46	0.268	0.296	0	5.351	5.929	0	1.165	1.182	0	23.298	23.639	0	1.415	1.408	1.338	28.301	28.16	26.751
PI3Kd_WT_apo	HIDFGHFLGNF	909	919	2	9	20.35	1.271	1.453	0	14.125	16.144	0	3.386	3.378	0	37.619	37.53	0	3.961	4.085	4.097	44.01	45.385	45.518
PI3Kd_WT_apo	LGNFKTKFGINRERVPFIL	916	934	4	16	16.87	3.002	3.081	0	18.765	19.258	0	4.154	3.926	0	25.962	24.537	0	5.008	4.646	4.494	31.298	29.039	28.085
PI3Kd_WT_apo	RERVPFIL	927	934	2	5	16.95	0.426	0.455	0	8.512	9.094	0	1.12	1.187	0	22.394	23.738	0	1.868	1.815	1.743	37.367	36.296	34.863
PI3Kd_WT_apo	YDFVHVIQQGKTNNSEKF	936	953	3	16	13.94	3.714	4.145	0	23.215	25.905	0	5.129	5.035	0	32.056	31.472	0	5.235	5.466	4.813	32.722	34.159	30.079
PI3Kd_WT_apo	YDFVHVIQQGKTNNSEKFERFRG	936	958	3	21	12.98	2.743	2.791	0	13.06	13.288	0	4.005	3.914	0	19.072	18.64	0	5.433	5.174	5.012	25.869	24.636	23.867
PI3Kd_WT_apo	FVHVIQQGKTNNSEKFERF	938	956	4	17	10.35	1.884	1.851	0	11.083	10.888	0	2.89	2.817	0	17.002	16.571	0	4.136	3.818	3.789	24.331	22.456	22.289
PI3Kd_WT_apo	FVHVIQQGKTNNSEKFERFRG	938	958	4	19	8.53	1.629	1.68	0	8.575	8.844	0	2.763	2.593	0	14.541	13.647	0	3.803	3.516	3.528	20.013	18.507	18.568
PI3Kd_WT_apo	VHVIQQGKTNNSEKFERFRG	939	958	3	18	6.86	1.782	1.977	0	9.902	10.981	0	3.123	2.792	0	17.353	15.514	0	4.282	3.702	3.851	23.787	20.566	21.393
PI3Kd_WT_apo	HVIQQGKTNNSEKFERFRG	940	958	4	17	6.09	3.43	2.839	0	20.177	16.702	0	3.019	2.759	0	17.758	16.231	0	4.482	4.035	4.038	26.365	23.733	23.756
PI3Kd_WT_apo	RGYCERA	957	963	2	5	2.45	0.12	0.127	0	2.406	2.538	0	0.065	0.138	0	1.304	2.758	0	0.117	0.076	0.007	2.344	1.51	0.133
PI3Kd_WT_apo	RAYTIL	962	967	1	4	13.16	0.053	0.012	0	1.328	0.294	0	0.007	0.027	0	0.165	0.678	0	0.004	0.033	-0.009	0.098	0.818	-0.214
PI3Kd_WT_apo	YTILRRHGLLF	964	974	2	9	15.8	0.339	0.403	0	3.763	4.482	0	0.722	0.677	0	8.021	7.523	0	1.14	1.041	1.022	12.666	11.567	11.359
PI3Kd_WT_apo	ILRRHGLL	966	973	2	6	7.22	0.278	0.378	0	4.632	6.294	0	0.67	0.674	0	11.165	11.235	0	1.112	1.046	0.982	18.541	17.435	16.364
PI3Kd_WT_apo	ILRRHGLLF	966	974	2	7	13.57	0.3	0.431	0	4.283	6.158	0	0.645	0.666	0	9.207	9.508	0	0.973	0.843	0.847	13.907	12.043	12.094
PI3Kd_WT_apo	FALMRAAGL	978	986	2	7	17.04	0.607	0.698	0	8.671	9.967	0	2.303	2.33	0	32.898	33.282	0	4.089	4.229	4.058	58.414	60.409	57.969
PI3Kd_WT_apo	FALMRAAGLPEL	978	989	2	9	19.8	0.678	0.792	0	7.529	8.803	0	2.935	3.042	0	32.608	33.795	0	5.374	5.272	5.148	59.707	58.581	57.205
PI3Kd_WT_apo	RAAGLPEL	982	989	2	5	13.32	0.472	0.389	0	9.434	7.777	0	2.012	2.054	0	40.233	41.074	0	0	3.806	3.709	0	76.128	74.175
PI3Kd_WT_apo	RAAGLPELSC	982	991	2	7	13.04	1.542	1.686	0	22.022	24.079	0	3.821	3.789	0	54.579	54.124	0	5.542	5.445	5.325	79.178	77.788	76.071
PI3Kd_WT_apo	PELSCSKDIQY	987	997	2	9	12.18	2.139	2.314	0	23.769	25.712	0	4.731	4.58	0	52.57	50.887	0	5.575	5.492	4.909	61.946	61.02	54.547
PI3Kd_WT_apo	PELSCSKDIQYLKD	987	1000	3	12	12.53	1.76	1.924	0	14.669	16.032	0	4.229	4.223	0	35.245	35.195	0	5.35	5.451	5.219	44.583	45.422	43.494
PI3Kd_WT_apo	SCSKDIQY	990	997	2	6	7.04	1.632	1.696	0	27.206	28.27	0	3.911	3.719	0	65.19	61.99	0	4.015	4.064	3.967	66.922	67.727	66.124
PI3Kd_WT_apo	SCSKDIQYLKD	990	1000	3	9	8.41	1.219	1.366	0	13.539	15.178	0	3.809	3.6	0	42.32	40.004	0	4.382	4.871	4.712	48.686	54.122	52.353
PI3Kd_WT_apo	SCSKDIQYLKDSL	990	1002	3	11	15.43	1.314	1.191	0	11.945	10.827	0	3.648	3.177	0	33.161	28.882	0	4.085	4.074	4.42	37.141	37.04	40.18
PI3Kd_WT_apo	SKDIQYLKDSL	992	1002	2	9	12.78	0.861	0.933	0	9.571	10.371	0	2.579	2.625	0	28.656	29.163	0	3.639	3.483	3.733	40.435	38.698	41.478
PI3Kd_WT_apo	IQYLKDSL	995	1002	2	6	13.15	0.406	0.412	0	6.77	6.859	0	0.899	0.833	0	14.976	13.875	0	1.546	1.487	1.221	25.759	24.776	20.353
PI3Kd_WT_apo	LKDSLALGKTEEEALKHFRVKF	998	1019	5	20	16.51	2.725	3.232	0	13.624	16.158	0	3.41	3.075	0	17.048	15.375	0	5.498	5.204	5.3	27.489	26.021	26.502
PI3Kd_WT_apo	SLALGKTEE	1001	1009	2	7	7.18	2.62	2.688	0	37.429	38.404	0	3.442	3.465	0	49.17	49.501	0	4.347	4.214	4.165	62.097	60.204	59.5
PI3Kd_WT_apo	SLALGKTEEE	1001	1010	2	8	7.45	2.473	2.604	0	30.914	32.547	0	3.504	3.535	0	43.8	44.19	0	4.83	4.621	4.557	60.376	57.765	56.968
PI3Kd_WT_apo	SLALGKTEEEALKHFRVKF	1001	1019	4	17	16.61	1.997	2.078	0	11.748	12.223	0	3.077	2.969	0	18.101	17.466	0	4.554	4.388	4.396	26.788	25.814	25.861
PI3Kd_WT_apo	SLALGKTEEEALKHFRVKFNE	1001	1021	4	19	16.01	2.028	2.229	0	10.674	11.734	0	2.918	3.087	0	15.359	16.249	0	4.717	4.224	4.471	24.825	22.23	23.531
PI3Kd_WT_apo	SLALGKTEEEALKHFRVKFNEA	1001	1022	3	20	16.1	2.255	2.439	0	11.273	12.193	0	3.169	3.132	0	15.846	15.659	0	4.66	4.295	4.303	23.3	21.476	21.515
PI3Kd_WT_apo	SLALGKTEEEALKHFRVKFNEAL	1001	1023	4	21	17.9	2.25	2.186	0	10.715	10.41	0	3.119	3.104	0	14.854	14.78	0	4.623	4.561	4.512	22.012	21.721	21.484
PI3Kd_WT_apo	ALGKTEEEALKHFRVKF	1003	1019	4	15	14.69	1.625	1.67	0	10.83	11.133	0	2.461	2.46	0	16.408	16.403	0	3.796	3.454	3.034	25.306	23.028	20.224
PI3Kd_WT_apo	ALGKTEEEALKHFRVKFNE	1003	1021	4	17	14.42	1.709	1.89	0	10.053	11.12	0	2.622	2.493	0	15.424	14.666	0	3.326	3.644	3.248	19.566	21.435	19.103
PI3Kd_WT_apo	ALGKTEEEALKHFRVKFNEA	1003	1022	4	18	14.16	1.628	2.027	0	9.045	11.263	0	2.389	2.448	0	13.271	13.599	0	3.702	3.644	3.594	20.565	20.244	19.965
PI3Kd_WT_apo	ALGKTEEEALKHFRVKFNEAL	1003	1023	3	19	16.31	1.607	1.694	0	8.457	8.913	0	2.396	2.41	0	12.611	12.683	0	3.634	3.464	3.357	19.125	18.23	17.669
PI3Kd_WT_apo	EALKHFRVKF	1010	1019	3	8	10.54	0.018	-0.009	0	0.228	-0.115	0	0.001	0.021	0	0.009	0.26	0	0.22	0.149	0.179	2.756	1.865	2.232
PI3Kd_WT_apo	EALKHFRVKFNE	1010	1021	3	10	9.46	0.028	0.013	0	0.285	0.131	0	0.037	0.029	0	0.372	0.287	0	0.274	0.184	0.237	2.743	1.844	2.367
PI3Kd_WT_apo	EALKHFRVKFNEA	1010	1022	2	11	9.53	1.063	0.938	0	9.664	8.524	0	2.699	0	0	24.535	0	0	3.177	2.716	2.968	28.885	24.693	26.983
PI3Kd_WT_apo	EALKHFRVKFNEAL	1010	1023	3	12	12.38	0.076	0.04	0	0.637	0.331	0	0.058	0.061	0	0.487	0.51	0	0.267	0.211	0.195	2.226	1.756	1.623
PI3Kd_WT_apo	ALKHFRVKFNE	1011	1021	3	9	8.82	-0.068	-0.016	0	-0.757	-0.177	0	0.173	-0.028	0	1.918	-0.31	0	0.066	0.127	0.044	0.735	1.413	0.494
PI3Kd_WT_apo	ALKHFRVKFNEAL	1011	1023	3	11	11.52	0.009	-0.003	0	0.086	-0.032	0	-0.011	-0.019	0	-0.097	-0.174	0	0.1	0.056	0.054	0.908	0.507	0.49
PI3Kd_WT_apo	ALRESWKTKVNWLAHNVSKDNRQ	1022	1044	5	21	12	7.835	8.466	0	37.31	40.314	0	12.578	11.975	0	59.893	57.024	0	11.993	12.173	11.856	57.108	57.965	56.458
PI3Kd_WT_apo	LRESWKTKVNW	1023	1033	3	9	12.25	2.033	2.338	0	22.585	25.975	0	4.486	4.424	0	49.841	49.155	0	4.648	4.474	4.25	51.645	49.714	47.22
PI3Kd_WT_apo	LRESWKTKVNWLAHNVSKDNRQ	1023	1044	5	20	11.48	7.028	7.602	0	35.14	38.009	0	10.873	11.079	0	54.366	55.397	0	10.901	10.966	10.495	54.506	54.832	52.477
PI3Kd_WT_apo	RESWKTKVNW	1024	1033	3	8	11.85	1.928	2.194	0	24.105	27.42	0	4.359	4.41	0	54.483	55.129	0	4.602	4.393	4.396	57.525	54.918	54.95
PI3Kd_WT_apo	RESWKTKVNWLAHNVSKDNRQ	1024	1044	4	19	10.98	7.443	7.875	0	39.172	41.448	0	11.23	11.282	0	59.103	59.376	0	11.457	11.188	11.024	60.299	58.882	58.019
PI3Kd_WT_apo	RESWKTKVNWLAHNVSKDNRQ	1024	1044	5	19	10.98	7.673	7.828	0	40.382	41.199	0	11.267	11.401	0	59.298	60.006	0	11.624	11.442	11.329	61.181	60.222	59.629
PI3Kd_WT_apo	SWKTKVNWLAHNVSKDNRQ	1026	1044	4	17	11.8	7.382	7.944	0	43.424	46.731	0	11.096	11.1	0	65.271	65.293	0	11.344	11.376	11.086	66.731	66.919	65.212
PI3Kd_WT_apo	SWKTKVNWLAHNVSKDNRQ	1026	1044	5	17	11.8	7.725	7.747	0	45.441	45.571	0	11.641	11.677	0	68.474	68.686	0	11.242	11.595	10.924	66.127	68.203	64.258
PI3Kd_WT_apo	KTKVNWLAHNVSKDNRQ	1028	1044	4	15	6	4.788	5.168	0	31.922	34.453	0	7.361	7.132	0	49.075	47.548	0	7.478	7.231	7.14	49.854	48.207	47.6
PI3Kd_Y685A_apo	FWTKEENQS	11	19	2	7	7.92	4.037	4.582	4.885	57.672	65.459	69.791	4.923	4.741	4.649	70.328	67.733	66.409	5.14	4.535	4.531	73.426	64.787	64.726
PI3Kd_Y685A_apo	WTKEENQS	12	19	2	6	1.85	3.982	4.029	4.462	66.367	67.155	74.367	4.92	4.256	4.375	81.996	70.94	72.912	4.7	4.066	4.125	78.329	67.765	68.754
PI3Kd_Y685A_apo	WTKEENQSV	12	20	1	7	5.85	3.66	4.164	4.439	52.286	59.49	63.412	4.428	4.331	4.243	63.257	61.878	60.609	5.141	4.81	4.693	73.443	68.715	67.036
PI3Kd_Y685A_apo	WTKEENQSVV	12	21	2	8	8.05	3.275	3.81	3.916	40.933	47.627	48.948	4.683	4.558	4.4	58.533	56.981	55	5.586	5.133	5.126	69.827	64.166	64.07
PI3Kd_Y685A_apo	WTKEENQSVVVD	12	23	2	10	8.33	3.468	3.945	4.136	34.679	39.451	41.364	4.768	4.68	4.464	47.684	46.803	44.639	5.773	5.323	5.239	57.729	53.227	52.385
PI3Kd_Y685A_apo	VVDFLLPTGVY	21	31	1	8	21.11	0	0.002	0	0	0.022	0	0.189	0.322	0.614	2.365	4.027	7.677	0.894	1.108	0	11.181	13.855	0
PI3Kd_Y685A_apo	FLLPTGV	24	30	1	4	18.18	0.085	0.085	0.097	2.118	2.128	2.43	0.472	0.449	0.671	11.798	11.23	16.779	1.113	1.06	1.089	27.833	26.501	27.223
PI3Kd_Y685A_apo	FLLPTGVY	24	31	1	5	19.59	0	0.076	0.065	0	1.515	1.292	0.486	0.434	0.45	9.723	8.688	9.008	1.083	1.051	1.068	21.665	21.028	21.36
PI3Kd_Y685A_apo	YLNFPVSRNANL	31	42	2	9	15.63	1.858	2.048	1.987	20.641	22.752	22.075	3.07	3.064	2.944	34.108	34.043	32.717	3.355	3.142	3.092	37.278	34.908	34.356
PI3Kd_Y685A_apo	LNFPVSRNANL	32	42	2	8	13.59	1.285	1.468	1.457	16.065	18.354	18.212	2.407	2.524	2.376	30.089	31.547	29.706	2.775	2.493	2.371	34.682	31.167	29.643
PI3Kd_Y685A_apo	LNFPVSRNANLST	32	44	2	10	12.39	1.169	1.335	1.339	11.686	13.349	13.388	2.547	2.655	2.503	25.468	26.553	25.028	3.882	3.703	3.648	38.815	37.034	36.48
PI3Kd_Y685A_apo	PVSRNANL	35	42	2	6	4.51	1.469	1.694	1.623	24.491	28.227	27.044	3.098	2.929	2.819	51.641	48.821	46.985	3.362	3.087	3.096	56.032	51.457	51.595
PI3Kd_Y685A_apo	STIKQLL	43	49	2	5	13.27	0	0.019	0.003	0	0.379	0.05	0	-0.059	0.013	0	-1.171	0.264	0.049	0.003	0.011	0.981	0.061	0.22
PI3Kd_Y685A_apo	STIKQLLWHRAQYEPLF	43	59	3	14	18.36	0	0.651	0.557	0	4.648	3.976	1.342	1.431	1.445	9.588	10.222	10.322	2.732	2.666	2.687	19.511	19.046	19.192
PI3Kd_Y685A_apo	STIKQLLWHRAQYEPLFHMLSGPEA	43	67	3	21	19.44	2.646	2.894	2.821	12.598	13.783	13.432	4.927	5.125	5.107	23.464	24.406	24.317	7.153	6.774	6.896	34.061	32.258	32.838
PI3Kd_Y685A_apo	LLWHRAQYEPLF	48	59	2	9	18.7	0.662	0.571	0.432	7.36	6.343	4.795	1.339	1.52	1.4	14.879	16.887	15.561	2.491	2.222	2.156	27.678	24.69	23.951
PI3Kd_Y685A_apo	HMLSGPEA	60	67	2	5	6.4	1.31	1.492	1.529	26.191	29.834	30.582	2.45	2.393	2.285	49	47.856	45.706	3.127	2.894	2.892	62.533	57.881	57.84
PI3Kd_Y685A_apo	TCINQTAEQQEL	71	82	2	10	10.21	1.073	1.201	1.14	10.734	12.008	11.399	2.712	2.682	2.802	27.121	26.821	28.022	3.504	3.573	3.288	35.041	35.73	32.878
PI3Kd_Y685A_apo	TCINQTAEQQELEDEQRRLCDVQPFL	71	96	3	23	20.05	4.022	4.073	3.868	17.489	17.708	16.818	7.979	7.976	8.06	34.691	34.68	35.042	10.548	10.315	10.617	45.86	44.847	46.162
PI3Kd_Y685A_apo	EDEQRRLCDVQPFL	83	96	2	11	17.2	1.337	0.734	0.619	12.155	6.675	5.628	2.203	2.074	2.12	20.026	18.855	19.276	3.812	3.543	3.532	34.654	32.212	32.106
PI3Kd_Y685A_apo	EQRRLCDVQPFL	85	96	2	9	16.52	0.44	0.405	0.401	4.884	4.502	4.457	1.39	1.538	1.564	15.445	17.089	17.382	2.622	2.57	2.568	29.134	28.55	28.534
PI3Kd_Y685A_apo	QRRLCDVQPFLPVLRLV	86	102	3	13	9.83	0.247	0.26	0.245	1.9	1.997	1.881	0.896	1.055	0.93	6.889	8.112	7.153	2.048	1.939	1.794	15.755	14.916	13.802
PI3Kd_Y685A_apo	RRLCDVQPFLPVLRL	87	101	3	11	20.63	0.315	0.283	0.059	2.86	2.573	0.538	1.095	1.228	1.834	9.951	11.165	16.675	0	1.806	1.931	0	16.414	17.554
PI3Kd_Y685A_apo	VQPFLPVLRL	92	101	2	6	20.96	0.051	0.14	0.025	0.842	2.339	0.421	0.187	0.283	0.134	3.109	4.721	2.241	0.861	0.705	0.68	14.342	11.747	11.326
PI3Kd_Y685A_apo	RLVAREGDRVKKLINSQISLL	100	120	3	19	15.26	6.973	7.298	7.17	36.702	38.412	37.738	8.664	8.893	8.661	45.6	46.804	45.583	8.591	8.503	8.644	45.216	44.754	45.496
PI3Kd_Y685A_apo	VAREGDRVKKLINS	102	115	2	12	6.04	6.436	6.926	7.162	53.632	57.721	59.68	0	7.574	6.837	0	63.119	56.977	7.109	7.384	7.31	59.24	61.535	60.915
PI3Kd_Y685A_apo	VAREGDRVKKLINSQ	102	116	2	13	6.59	7.32	7.247	6.916	56.306	55.748	53.198	7.736	8.184	7.966	59.511	62.957	61.275	8.546	7.679	8.2	65.736	59.066	63.074
PI3Kd_Y685A_apo	VAREGDRVKKLINSQISL	102	119	3	16	12.72	0	0	6.339	0	0	39.617	7.148	7.059	7.293	44.678	44.12	45.58	8.508	7.429	7.574	53.176	46.43	47.339
PI3Kd_Y685A_apo	VAREGDRVKKLINSQISLL	102	120	2	17	15.69	6.628	6.089	6.709	38.989	35.816	39.462	6.974	6.77	0	41.023	39.821	0	7.428	7.848	7.107	43.696	46.167	41.806
PI3Kd_Y685A_apo	LIGKGLHE	120	127	2	6	5.27	0.45	0.708	0.68	7.505	11.8	11.33	1.268	1.157	1.037	21.139	19.287	17.276	2.591	2.493	2.359	43.179	41.556	39.309
PI3Kd_Y685A_apo	LIGKGLHEFDSL	120	131	2	10	15.17	0.733	0.906	0.84	7.334	9.057	8.4	2.389	2.538	2.414	23.895	25.379	24.137	3.21	3.129	2.82	32.104	31.289	28.2
PI3Kd_Y685A_apo	LIGKGLHEFDSLCDPEVND	120	138	3	16	17	1.45	1.904	1.738	9.06	11.898	10.861	4.099	3.773	3.747	25.62	23.578	23.421	5.028	5.068	5.026	31.426	31.674	31.411
PI3Kd_Y685A_apo	LIGKGLHEFDSLCDPEVNDF	120	139	3	17	19.29	1.697	2.001	1.992	9.983	11.771	11.719	3.407	3.611	3.472	20.04	21.243	20.422	5.081	4.69	4.348	29.891	27.59	25.574
PI3Kd_Y685A_apo	IGKGLHE	121	127	1	5	2.42	0.442	0.669	0.693	8.833	13.389	13.851	1.291	1.183	1.017	25.815	23.669	20.346	2.722	2.336	2.238	54.437	46.723	44.761
PI3Kd_Y685A_apo	IGKGLHEF	121	128	2	6	9.35	0.147	0.232	0.212	2.452	3.865	3.531	0.806	0.758	0.648	13.433	12.628	10.794	1.617	1.301	1.142	26.956	21.687	19.025
PI3Kd_Y685A_apo	IGKGLHEFDSL	121	131	2	9	13.9	1.052	0	1.263	11.693	0	14.028	2.279	2.498	2.217	25.323	27.754	24.636	2.878	2.665	2.537	31.975	29.613	28.188
PI3Kd_Y685A_apo	IGKGLHEFDSLCDPEVND	121	138	3	15	16.05	1.792	1.973	2.065	11.948	13.153	13.768	3.558	3.638	3.574	23.72	24.252	23.824	4.896	4.453	4.767	32.64	29.684	31.78
PI3Kd_Y685A_apo	GKGLHE	122	127	1	4	2.43	0.326	0.475	0.469	8.153	11.883	11.736	1.031	0.889	0.848	25.781	22.22	21.2	2.291	1.884	1.861	57.267	47.099	46.513
PI3Kd_Y685A_apo	FDSLCDPEVNDF	128	139	1	9	18.84	0.801	0.879	0.766	8.905	9.765	8.51	1.675	1.679	1.582	18.609	18.653	17.58	2.451	2.277	2.335	27.237	25.302	25.943
PI3Kd_Y685A_apo	CDPEVND	132	138	1	4	3.32	0.067	0.159	0.126	1.67	3.969	3.142	0.312	0.288	0.313	7.802	7.2	7.821	1.39	1.237	1.317	34.759	30.918	32.925
PI3Kd_Y685A_apo	CDPEVNDF	132	139	1	5	12.52	0.138	0.176	0.083	2.753	3.524	1.652	0.305	0.252	0.288	6.102	5.031	5.765	1.171	1.055	1.044	23.41	21.095	20.878
PI3Kd_Y685A_apo	PEVNDF	134	139	1	4	11.67	-0.016	0.071	0.055	-0.396	1.783	1.372	0.137	0.119	0.097	3.419	2.965	2.433	0.495	0.425	0.439	12.376	10.628	10.963
PI3Kd_Y685A_apo	FRAKMCQF	139	146	2	6	12.21	0	0.101	0.064	0	1.682	1.07	0.658	0.635	0.607	10.969	10.584	10.109	1.76	1.565	1.552	29.338	26.089	25.859
PI3Kd_Y685A_apo	FCEEAAARRQQLGWEAW	146	162	3	15	18.19	0	1.634	1.519	0	10.89	10.125	3.625	3.632	3.58	24.165	24.212	23.869	7.228	6.893	6.761	48.186	45.954	45.07
PI3Kd_Y685A_apo	CEEAAARRQQLGWEAW	147	162	3	14	17.4	0	1.581	1.466	0	11.289	10.468	3.375	3.463	3.365	24.106	24.739	24.035	6.796	6.409	6.287	48.54	45.781	44.906
PI3Kd_Y685A_apo	AAARRQQLGWEA	150	161	2	10	10.2	0	1.609	1.47	0	16.094	14.701	3.41	3.442	3.32	34.104	34.422	33.204	6.369	5.849	5.75	63.687	58.494	57.504
PI3Kd_Y685A_apo	AAARRQQLGWEAW	150	162	2	11	17.58	1.309	1.413	1.388	11.9	12.844	12.62	3.032	3.08	2.928	27.565	28.005	26.619	5.518	5.112	4.979	50.16	46.472	45.265
PI3Kd_Y685A_apo	AARRQQLGWEAW	151	162	2	10	17.67	1.393	1.346	1.31	13.928	13.459	13.102	2.786	2.899	2.789	27.864	28.993	27.894	4.921	4.52	4.373	49.208	45.2	43.727
PI3Kd_Y685A_apo	ARRQQLGWEAW	152	162	2	9	17.68	0	0	1.193	0	0	13.25	0	2.667	2.672	0	29.632	29.693	0	4.676	4.348	0	51.959	48.312
PI3Kd_Y685A_apo	WLQYSFPLQLEPSAQTWGPGTLRLPNRALL	162	191	3	24	20.95	9.781	9.57	9.777	40.753	39.876	40.738	11.957	11.409	11.045	49.821	47.538	46.022	14.114	13.316	13.856	58.808	55.484	57.735
PI3Kd_Y685A_apo	LQYSFPLQLEPSAQTWGPGTLRLPNRALL	163	191	3	23	20.63	10.27	10.23	10.46	44.651	44.477	45.478	12.396	12.091	11.777	53.895	52.571	51.205	14.705	14.074	14.36	63.933	61.19	62.437
PI3Kd_Y685A_apo	QYSFPLQLEPSAQTWGPGTLRLPNRALL	164	191	3	22	20.56	10.171	10.327	10.459	46.232	46.939	47.542	12.452	12.008	11.743	56.601	54.581	53.377	14.798	14.117	14.214	67.263	64.168	64.607
PI3Kd_Y685A_apo	PLQLEPSAQTWGPGTLRLPNRALL	168	191	3	19	19.42	10.217	10.559	10.885	53.775	55.572	57.289	12.158	12.236	11.647	63.987	64.399	61.3	13.942	13.492	13.428	73.377	71.008	70.674
PI3Kd_Y685A_apo	QTWGPGTLRLPNRALL	176	191	3	12	17.82	7.225	7.419	7.687	60.205	61.822	64.061	8.291	8.399	8.094	69.095	69.996	67.446	9.221	9.187	8.647	76.839	76.562	72.059
PI3Kd_Y685A_apo	WGPGTLRLPNRALL	178	191	3	10	17.91	0	5.439	5.61	0	54.391	56.103	6.256	0	6.15	62.555	0	61.502	0	7.179	6.968	0	71.789	69.683
PI3Kd_Y685A_apo	LRLPNRALL	183	191	2	6	13.54	2.544	2.865	3.085	42.403	47.747	51.413	3.626	4.222	3.563	60.439	70.372	59.382	4.912	4.723	4.584	81.862	78.719	76.399
PI3Kd_Y685A_apo	VNVKFEGSE	192	200	2	7	7.94	1.655	1.892	1.992	23.649	27.023	28.458	2.481	2.441	2.329	35.44	34.867	33.276	3.181	2.918	2.88	45.449	41.685	41.141
PI3Kd_Y685A_apo	VNVKFEGSEE	192	201	2	8	8.28	1.841	2.257	2.41	23.015	28.212	30.124	2.977	2.891	2.849	37.208	36.141	35.615	4.182	3.271	3.333	52.274	40.89	41.669
PI3Kd_Y685A_apo	VNVKFEGSEES	192	202	2	9	7.77	2.558	2.977	3.107	28.425	33.078	34.518	3.812	3.845	3.643	42.355	42.72	40.481	4.656	4.3	4.176	51.736	47.783	46.403
PI3Kd_Y685A_apo	VNVKFEGSEESF	192	203	2	10	13.52	2.618	3.25	3.118	26.179	32.498	31.184	0	0	3.828	0	0	38.278	4.608	0	4.366	46.078	0	43.662
PI3Kd_Y685A_apo	VNVKFEGSEESFT	192	204	2	11	12.71	3.282	3.549	3.777	29.84	32.263	34.335	4.376	4.534	4.271	39.786	41.217	38.825	5.356	4.968	4.833	48.692	45.162	43.935
PI3Kd_Y685A_apo	ESFTFQVSTKDVPLAL	201	216	2	13	19.84	2.721	2.217	2.111	20.932	17.056	16.238	3.852	3.882	3.742	29.627	29.864	28.788	4.604	4.497	4.729	35.416	34.594	36.38
PI3Kd_Y685A_apo	FTFQVSTKDVPLAL	203	216	2	11	19.61	1.476	1.426	1.372	13.415	12.963	12.471	3.023	3.03	2.893	27.486	27.546	26.296	3.81	3.626	3.575	34.638	32.96	32.497
PI3Kd_Y685A_apo	TFQVSTKDVPLAL	204	216	2	10	17.14	0.221	1.305	1.278	2.208	13.049	12.784	2.907	2.963	2.821	29.067	29.625	28.211	3.729	3.54	3.497	37.294	35.4	34.975
PI3Kd_Y685A_apo	FQVSTKDVPLAL	205	216	2	9	16.83	0.519	0.625	0.549	5.763	6.947	6.104	2.178	2.2	2.067	24.196	24.444	22.961	2.947	2.805	2.745	32.748	31.165	30.5
PI3Kd_Y685A_apo	FQVSTKDVPLALM	205	217	2	10	18.58	0.826	0.503	0.457	8.264	5.031	4.569	2.164	2.04	2.329	21.64	20.397	23.294	2.798	2.701	2.665	27.976	27.011	26.651
PI3Kd_Y685A_apo	QVSTKDVPLAL	206	216	2	8	14.06	0.51	0.635	0.71	6.37	7.933	8.869	2.172	2.28	2.06	27.146	28.505	25.746	0	2.793	2.774	0	34.916	34.679
PI3Kd_Y685A_apo	VSTKDVPLAL	207	216	2	7	13.9	0	0.399	0.428	0	5.694	6.12	1.376	1.371	1.478	19.663	19.589	21.115	2.212	2.025	0	31.594	28.927	0
PI3Kd_Y685A_apo	ACALRKKATV	218	227	2	8	1.75	0	1.8	1.754	0	22.505	21.924	3.173	2.945	3.072	39.668	36.817	38.401	4.511	4.075	3.809	56.391	50.943	47.612
PI3Kd_Y685A_apo	CALRKKATV	219	227	2	7	0.88	1.832	1.685	1.647	26.177	24.071	23.522	3.273	3.222	3.135	46.763	46.034	44.789	4.233	4.422	3.895	60.475	63.166	55.647
PI3Kd_Y685A_apo	CALRKKATVFRQPLVEQPED	219	238	3	16	8.43	6.052	6.525	6.448	37.827	40.78	40.297	8.352	8.327	8.1	52.202	52.045	50.626	9.315	8.971	8.897	58.221	56.067	55.605
PI3Kd_Y685A_apo	ALRKKATVFRQPLVEQPED	220	238	3	15	8.09	5.998	0	6.465	39.984	0	43.1	8.193	8.197	7.895	54.62	54.648	52.631	9.475	8.836	8.655	63.168	58.905	57.699
PI3Kd_Y685A_apo	LRKKATVFRQPLVEQPED	221	238	3	14	8.26	5.894	6.047	6.26	42.097	43.193	44.717	7.87	7.803	7.471	56.212	55.733	53.362	8.11	8.381	7.814	57.926	59.865	55.814
PI3Kd_Y685A_apo	RKKATVFRQPLVEQPED	222	238	3	13	7.68	0	6.248	6.209	0	48.062	47.758	7.756	7.783	7.551	59.659	59.873	58.084	8.686	8.213	8.159	66.818	63.18	62.763
PI3Kd_Y685A_apo	FRQPLVEQPED	228	238	2	7	9.34	3.555	3.726	3.803	50.786	53.225	54.327	4.681	4.596	4.597	66.875	65.655	65.672	5.409	5.309	5.221	77.278	75.847	74.587
PI3Kd_Y685A_apo	YTLQVNGRHEYL	239	250	2	10	12.58	0	0.347	0.364	0	3.471	3.645	0.375	0.355	0.298	3.754	3.545	2.977	0.517	0.413	0.382	5.165	4.134	3.82
PI3Kd_Y685A_apo	YTLQVNGRHEYLYGSY	239	254	3	14	14.1	0.774	1.028	0.986	5.531	7.339	7.046	1.137	1.081	1.07	8.119	7.722	7.646	1.739	1.587	1.514	12.418	11.334	10.813
PI3Kd_Y685A_apo	YTLQVNGRHEYLYGSYPLCQ	239	258	3	17	16.2	0.927	1.074	1.018	5.451	6.32	5.986	1.113	1.155	1.018	6.549	6.796	5.985	1.699	1.642	1.693	9.995	9.659	9.96
PI3Kd_Y685A_apo	YTLQVNGRHEYLYGSYPLCQF	239	259	2	18	19.94	0.869	1.068	0.95	4.826	5.933	5.279	1.019	1.101	0.977	5.663	6.115	5.43	1.613	1.481	1.593	8.962	8.227	8.852
PI3Kd_Y685A_apo	LQVNGRHEYL	241	250	2	8	12.69	0.297	0.22	0.543	3.717	2.747	6.782	0.387	0.595	0.665	4.832	7.441	8.316	0.504	0.346	0.354	6.3	4.321	4.424
PI3Kd_Y685A_apo	QVNGRHEYL	242	250	2	7	7.34	0.106	0.413	0.822	1.512	5.893	11.748	0	0.372	0.247	0	5.31	3.528	0	0.349	0.257	0	4.99	3.665
PI3Kd_Y685A_apo	QVNGRHEYLYGSYPLCQF	242	259	3	15	19.07	0.666	0.806	0.794	4.441	5.371	5.292	1.286	0.935	0.881	8.571	6.23	5.871	1.428	1.35	1.368	9.522	8.999	9.118
PI3Kd_Y685A_apo	YGSYPLCQ	251	258	1	5	13.44	-0.008	0.49	0.577	-0.158	9.809	11.531	0.495	0.522	0.577	9.906	10.435	11.549	0.537	0.611	0.446	10.741	12.22	8.924
PI3Kd_Y685A_apo	YGSYPLCQF	251	259	2	6	20.27	0.235	0.329	0.623	3.922	5.482	10.388	0.254	0.312	0.226	4.226	5.194	3.769	0.312	0.227	0.307	5.194	3.778	5.12
PI3Kd_Y685A_apo	FQYICS	259	264	1	4	13.32	0	0.722	0.709	0	18.041	17.73	0.904	0.899	0.936	22.606	22.479	23.406	1.006	1	0.984	25.138	24.991	24.609
PI3Kd_Y685A_apo	FQYICSCL	259	266	1	6	20.69	0	0.229	0.319	0	3.82	5.313	0.871	0.24	0.215	14.509	3.992	3.585	0	0.226	0	0	3.76	0
PI3Kd_Y685A_apo	QYICSCL	260	266	1	5	17.41	0.018	0.022	0.027	0.364	0.43	0.53	0.019	0.025	0.024	0.385	0.495	0.479	0.104	0.067	0.071	2.085	1.348	1.419
PI3Kd_Y685A_apo	CLHSGLTPHL	265	274	2	7	10.56	0	0.936	0.902	0	13.365	12.891	1.121	1.287	1.141	16.02	18.389	16.298	1.591	1.53	1.482	22.733	21.864	21.167
PI3Kd_Y685A_apo	CLHSGLTPHLTM	265	276	2	9	12.73	1.122	1.074	1.044	12.465	11.939	11.6	2.214	2.453	2.444	24.6	27.25	27.158	3.652	3.353	3.146	40.578	37.253	34.96
PI3Kd_Y685A_apo	CLHSGLTPHLTMVHSSSIL	265	283	3	16	14.19	0.525	0.628	0.796	3.284	3.924	4.974	0.667	0.694	0.695	4.169	4.335	4.344	0.871	0.787	0.722	5.443	4.918	4.514
PI3Kd_Y685A_apo	HSGLTPHL	267	274	2	5	8.4	0.842	0.856	0.88	16.849	17.121	17.59	1.073	1.02	1.043	21.464	20.397	20.857	1.506	1.375	1.352	30.129	27.503	27.047
PI3Kd_Y685A_apo	HSGLTPHLTMVHSSSIL	267	283	3	14	13.26	0.523	0.615	0.638	3.734	4.393	4.558	0.699	0.637	0.622	4.993	4.552	4.444	0.933	0.795	0.767	6.662	5.68	5.476
PI3Kd_Y685A_apo	HSGLTPHLTMVHSSSILA	267	284	3	15	12.55	0.741	0.721	0.706	4.938	4.808	4.706	0.768	0.715	0.684	5.122	4.767	4.563	1.224	1.013	0.983	8.162	6.755	6.555
PI3Kd_Y685A_apo	TMVHSSSIL	275	283	2	7	11.22	0.005	0.036	0.09	0.069	0.509	1.291	0.128	0.092	0.075	1.829	1.32	1.067	0.407	0.308	0.225	5.814	4.397	3.211
PI3Kd_Y685A_apo	VHSSSIL	277	283	1	5	8.93	0.148	0.196	0.267	2.958	3.927	5.348	0.221	0.232	0.34	4.43	4.636	6.803	0.58	0.697	0.436	11.606	13.943	8.711
PI3Kd_Y685A_apo	RDEQSNPAPQVQKPRAKPPPIPAKKPSSVSL	286	316	5	21	6.6	13.268	13.873	14.267	63.18	66.064	67.939	14.376	14.342	13.722	68.458	68.294	65.343	14.537	13.861	14.079	69.222	66.003	67.041
PI3Kd_Y685A_apo	PQVQKPRAKPPPIPAKKPSSVSL	294	316	4	15	6.83	11.023	11.367	11.723	73.484	75.783	78.155	11.886	11.582	11.175	79.243	77.214	74.497	12	11.346	11.325	80	75.638	75.503
PI3Kd_Y685A_apo	WSLEQPFRIEL	317	327	2	8	21.01	1.103	0.78	0.76	13.79	9.752	9.505	1.308	1.221	1.345	16.346	15.265	16.817	1.887	1.783	2.04	23.587	22.283	25.496
PI3Kd_Y685A_apo	IQGSKVNADE	328	337	2	8	2.02	0	0.981	0.835	0	12.257	10.433	2.586	2.554	2.137	32.319	31.93	26.718	4.127	3.563	3.683	51.583	44.532	46.037
PI3Kd_Y685A_apo	FDYKDQLKTGERCL	426	439	3	12	12.94	1.778	1.966	1.906	14.813	16.383	15.885	3.283	3.314	3.074	27.362	27.614	25.619	4.016	3.705	3.573	33.467	30.873	29.778
PI3Kd_Y685A_apo	YKDQLKTGERC	428	438	3	9	3.77	2.841	3.271	3.429	31.562	36.349	38.102	4.431	4.347	4.209	49.236	48.301	46.766	5.387	4.808	4.785	59.853	53.423	53.172
PI3Kd_Y685A_apo	LNPTGTVRSNPNTDSAAAL	453	471	2	15	9.32	3.455	3.934	3.759	23.032	26.226	25.062	6.208	6.392	6.321	41.389	42.613	42.142	8.313	8.151	7.976	55.423	54.34	53.174
PI3Kd_Y685A_apo	ICLPEVAPHPVYY	473	485	2	8	17.07	3.264	3.431	3.175	40.802	42.886	39.692	4.399	4.393	4.35	54.992	54.918	54.369	5.58	5.397	5.258	69.754	67.459	65.723
PI3Kd_Y685A_apo	ICLPEVAPHPVYYPAL	473	488	2	10	18.9	2.667	2.878	2.638	26.667	28.778	26.384	4.057	3.776	3.731	40.566	37.756	37.306	4.537	5.155	5.213	45.367	51.552	52.127
PI3Kd_Y685A_apo	PEVAPHPVYYPAL	476	488	2	8	15.6	0	1.211	0.803	0	15.137	10.038	1.864	1.938	1.949	23.297	24.227	24.369	2.388	1.822	2.334	29.85	22.776	29.176
PI3Kd_Y685A_apo	EKILEL	489	494	1	4	14.67	0.041	0.08	0.021	1.022	1.997	0.528	0.102	0.079	0.092	2.554	1.967	2.311	0.74	0.7	0.581	18.495	17.504	14.516
PI3Kd_Y685A_apo	EKILELGRHSE	489	499	3	9	7.81	0.201	0.355	0.298	2.238	3.941	3.317	0.725	0.731	0.646	8.059	8.12	7.177	1.846	1.554	1.56	20.511	17.267	17.336
PI3Kd_Y685A_apo	EKILELGRHSEC	489	500	2	10	8.68	0.598	0.786	0.833	5.979	7.865	8.33	1.181	1.203	1.057	11.807	12.031	10.566	2.236	1.968	1.87	22.365	19.683	18.701
PI3Kd_Y685A_apo	EKILELGRHSECVHVTE	489	505	2	15	9.61	2.308	2.68	2.686	15.386	17.864	17.908	3.115	3.103	2.863	20.767	20.688	19.086	4.565	4.199	4.087	30.436	27.996	27.246
PI3Kd_Y685A_apo	EKILELGRHSECVHVTEE	489	506	2	16	9.66	0	2.906	2.858	0	18.163	17.86	3.303	3.364	3.031	20.643	21.024	18.942	4.83	4.351	4.236	30.186	27.197	26.477
PI3Kd_Y685A_apo	EKILELGRHSECVHVTEEEQ	489	508	3	18	9.56	2.576	3.034	3.053	14.311	16.857	16.959	3.59	3.623	3.296	19.945	20.128	18.314	5.657	5.067	4.584	31.43	28.151	25.466
PI3Kd_Y685A_apo	KILELGRHSEC	490	500	2	9	7.53	0.715	0.447	0.653	7.944	4.968	7.253	0.804	0.921	0.697	8.929	10.235	7.74	1.791	1.6	1.741	19.899	17.773	19.341
PI3Kd_Y685A_apo	LGRHSECVHVTE	494	505	3	10	4.19	2.451	2.834	3.039	24.511	28.336	30.389	0	3.141	2.849	0	31.413	28.494	3.901	3.451	3.407	39.012	34.511	34.07
PI3Kd_Y685A_apo	LGRHSECVHVTEE	494	506	3	11	4.35	2.604	3.095	3.196	23.672	28.135	29.054	3.668	3.459	3.181	33.349	31.448	28.917	4.199	3.72	3.72	38.172	33.818	33.822
PI3Kd_Y685A_apo	LGRHSECVHVTEEEQ	494	508	3	13	4.52	2.587	3.061	3.195	19.896	23.549	24.58	3.541	3.492	3.32	27.24	26.862	25.536	4.904	4.384	4.258	37.725	33.726	32.756
PI3Kd_Y685A_apo	GRHSECVHVTEE	495	506	3	10	3.31	2.911	3.11	3.337	29.11	31.097	33.368	3.51	3.713	3.492	35.1	37.131	34.921	4.206	3.882	4.015	42.059	38.819	40.146
PI3Kd_Y685A_apo	CVHVTEEEQ	500	508	2	7	3.78	1.918	2.296	2.301	27.397	32.802	32.872	2.86	2.51	2.379	40.855	35.86	33.983	4.173	3.731	3.74	59.613	53.297	53.432
PI3Kd_Y685A_apo	VHVTEE	501	506	1	4	2.22	1.628	1.948	1.946	40.699	48.701	48.657	2.361	2.253	2.202	59.031	56.331	55.058	2.953	2.743	0	73.836	68.576	0
PI3Kd_Y685A_apo	VHVTEEEQ	501	508	1	6	2.54	1.717	0	1.977	28.609	0	32.957	2.519	2.352	2.187	41.99	39.204	36.452	3.8	3.433	3.432	63.334	57.219	57.195
PI3Kd_Y685A_apo	VHVTEEEQLQL	501	511	2	9	13.45	0.985	1.231	1.299	10.948	13.675	14.429	1.814	1.719	1.537	20.158	19.097	17.073	4.6	4.148	4.382	51.111	46.085	48.689
PI3Kd_Y685A_apo	REILERRGSGEL	512	523	2	10	7.32	2.209	2.69	2.977	22.087	26.895	29.767	3.195	3.157	2.869	31.949	31.566	28.694	3.54	3.066	2.909	35.405	30.659	29.094
PI3Kd_Y685A_apo	YEHEKDLVWKLRHEVQEHFPEALARL	524	549	4	23	18.97	0.492	0.696	0.471	2.141	3.028	2.046	1.415	1.52	1.516	6.152	6.608	6.59	2.372	2.254	2.069	10.312	9.801	8.997
PI3Kd_Y685A_apo	HEKDLVWKLRHEVQEHFPEAL	526	546	4	18	17.61	0.361	0.561	0.527	2.008	3.119	2.93	1.361	1.383	1.374	7.563	7.683	7.632	2.12	1.977	2.028	11.776	10.984	11.268
PI3Kd_Y685A_apo	LLVTKWNKHEDVAQM	550	564	2	13	11.35	0	0.228	0.203	0	1.754	1.561	0	0.609	0	0	4.684	0	0.749	0.69	0	5.765	5.305	0
PI3Kd_Y685A_apo	LLVTKWNKHEDVAQML	550	565	3	14	15.35	-0.026	0.057	-0.044	-0.184	0.407	-0.312	0.252	0.197	0.074	1.803	1.405	0.526	0.483	0.322	0.269	3.451	2.303	1.922
PI3Kd_Y685A_apo	CSWPEL	569	574	1	3	19.09	0	-0.068	0.071	0	-2.277	2.359	0.442	0.582	0.559	14.719	19.386	18.619	1.241	1.303	1.204	41.381	43.429	40.141
PI3Kd_Y685A_apo	LDFSFPDCHVGSF	583	595	2	10	20.72	0	0.676	0.647	0	6.761	6.474	1.743	1.726	1.655	17.434	17.264	16.55	3.429	3.098	3.064	34.289	30.978	30.645
PI3Kd_Y685A_apo	FSFPDCHVGSF	585	595	2	8	19.41	0.217	0.409	0.332	2.708	5.109	4.154	0.857	0.838	0.794	10.709	10.479	9.927	2.178	1.952	1.867	27.23	24.399	23.337
PI3Kd_Y685A_apo	AIKSLRKLTDDEL	596	608	2	11	11.26	0.702	0.739	0.73	6.386	6.72	6.638	1.195	1.336	1.306	10.863	12.149	11.87	1.86	1.777	1.912	16.907	16.152	17.384
PI3Kd_Y685A_apo	FQYLLQ	609	614	1	4	16.86	0	0.017	0.106	0	0.436	2.647	0.048	0.047	0.113	1.192	1.187	2.816	0.061	0.135	0.055	1.523	3.376	1.386
PI3Kd_Y685A_apo	LVQVLKYESYL	615	625	2	9	18.4	0.953	1.152	1.12	10.59	12.798	12.442	1.92	1.902	1.879	21.331	21.132	20.874	2.65	2.575	2.553	29.444	28.613	28.366
PI3Kd_Y685A_apo	VQVLKYESY	616	624	2	7	11.98	1.109	1.013	1.006	15.84	14.471	14.375	1.676	1.727	1.689	23.944	24.671	24.135	1.767	1.771	1.678	25.244	25.302	23.97
PI3Kd_Y685A_apo	VQVLKYESYL	616	625	2	8	16.62	0	1.102	1.065	0	13.778	13.307	1.823	1.873	1.86	22.785	23.415	23.252	2.589	2.47	2.485	32.366	30.873	31.063
PI3Kd_Y685A_apo	VQVLKYESYLDC	616	627	2	10	16.74	0.827	0.941	1.093	8.267	9.41	10.932	1.872	1.844	1.802	18.716	18.438	18.016	3.157	2.941	2.936	31.574	29.406	29.361
PI3Kd_Y685A_apo	ELTKFLL	628	634	2	5	18.5	-0.014	-0.015	-0.05	-0.282	-0.31	-1.007	0.003	0.012	0.025	0.062	0.23	0.499	0.041	-0.012	-0.004	0.82	-0.248	-0.07
PI3Kd_Y685A_apo	ELTKFLLDRALANRKIGHFL	628	647	3	18	16.98	0	0.178	0.06	0	0.988	0.331	0.195	0.261	0.24	1.081	1.449	1.334	0.348	0.233	0.205	1.931	1.294	1.139
PI3Kd_Y685A_apo	LTKFLLDRALANRKIGHF	629	646	3	16	13.71	0.01	0.243	0.104	0.062	1.516	0.648	0.18	0.315	0.771	1.125	1.97	4.821	0.227	0.301	0.122	1.418	1.882	0.762
PI3Kd_Y685A_apo	TKFLLD	630	635	1	4	13.76	-0.063	0.044	-0.006	-1.58	1.098	-0.153	-0.004	-0.009	-0.009	-0.111	-0.229	-0.231	0.016	-0.065	-0.021	0.402	-1.613	-0.528
PI3Kd_Y685A_apo	TKFLLDRALANRKIGHF	630	646	3	15	13.14	0.102	0.17	0.087	0.68	1.135	0.58	0.29	0.246	0.336	1.931	1.64	2.24	0.46	0.445	0.352	3.068	2.969	2.345
PI3Kd_Y685A_apo	TKFLLDRALANRKIGHFL	630	647	3	16	15.42	0.039	0.234	0.145	0.246	1.463	0.906	0.565	0.301	0.253	3.533	1.88	1.579	0.218	0.293	0.113	1.365	1.829	0.707
PI3Kd_Y685A_apo	LLDRALANRKIGHF	633	646	3	12	10.44	0.061	0.118	0.056	0.506	0.98	0.468	0.359	0.29	0.206	2.995	2.417	1.719	0.59	0	0.447	4.917	0	3.727
PI3Kd_Y685A_apo	LLDRALANRKIGHFL	633	647	2	13	13.01	0.063	0.098	0.058	0.483	0.754	0.449	0.179	0.15	0.195	1.38	1.153	1.502	0.282	0.156	0.16	2.171	1.197	1.234
PI3Kd_Y685A_apo	LLDRALANRKIGHFLFWHL	633	651	4	17	18.75	0	0.134	0.046	0	0.786	0.272	0.138	0.106	0.185	0.813	0.623	1.087	0.162	0.139	0.092	0.955	0.818	0.54
PI3Kd_Y685A_apo	DRALANRKIGHF	635	646	3	10	7.15	0.06	0.068	-0.073	0.598	0.678	-0.73	0.333	-0.101	-0.006	3.332	-1.015	-0.06	0.6	0.141	0.512	6.005	1.408	5.118
PI3Kd_Y685A_apo	RALANRKIGHF	636	646	2	9	5.67	0.147	0.084	0.134	1.634	0.936	1.492	0.374	0.273	0.217	4.159	3.03	2.412	0.448	0	0.359	4.979	0	3.99
PI3Kd_Y685A_apo	LFWHLRSEM	647	655	2	7	17.01	0.079	0.011	-0.002	1.122	0.162	-0.032	0.093	0.287	0.152	1.331	4.098	2.174	-0.027	0.017	0.024	-0.382	0.242	0.346
PI3Kd_Y685A_apo	FWHLRSEM	648	655	2	6	14.83	-0.211	-0.187	-0.118	-3.524	-3.109	-1.961	-0.129	-0.12	-0.122	-2.143	-2.006	-2.038	-0.165	-0.167	-0.177	-2.756	-2.784	-2.946
PI3Kd_Y685A_apo	RSEMHVPSVA	652	661	2	7	8.26	0.729	1.082	1.158	10.41	15.452	16.546	1.041	1.052	0.941	14.867	15.024	13.447	1.447	1.319	1.217	20.668	18.843	17.393
PI3Kd_Y685A_apo	HVPSVA	656	661	1	3	3.15	0.712	0.793	0.83	23.719	26.432	27.658	0.895	0.842	0.826	29.835	28.078	27.547	1.225	1.144	1.284	40.821	38.137	42.794
PI3Kd_Y685A_apo	LRFGLIL	662	668	2	5	20.81	0.013	0.012	0.003	0.265	0.234	0.061	0.031	-0.015	-0.013	0.625	-0.303	-0.269	0.026	-0.019	-0.007	0.528	-0.389	-0.138
PI3Kd_Y685A_apo	LRFGLILE	662	669	2	6	19.96	-0.042	0.063	0.005	-0.7	1.056	0.08	0.049	0.015	0.023	0.823	0.253	0.379	0.049	0.019	-0.021	0.81	0.309	-0.342
PI3Kd_Y685A_apo	LRFGLILEA	662	670	2	7	20.34	0.033	0.047	0.02	0.471	0.672	0.293	0.02	0.03	0.029	0.283	0.432	0.41	0.076	0.016	0.048	1.086	0.231	0.683
PI3Kd_Y685A_apo	RFGLIL	663	668	1	4	19.79	0.051	-0.007	-0.021	1.264	-0.174	-0.533	-0.012	-0.01	-0.014	-0.31	-0.258	-0.35	-0.006	-0.009	-0.01	-0.154	-0.228	-0.252
PI3Kd_Y685A_apo	EAYCRGSTHHMKVL	669	682	3	12	6.03	0.062	0.26	0.273	0.516	2.164	2.274	0.478	0.398	0.45	3.986	3.313	3.75	0	1.099	0.923	0	9.156	7.688
PI3Kd_Y685A_apo	YCRGSTHHMKVLM	671	683	3	11	6.5	0.042	0	0.34	0.384	0	3.095	-0.162	0.422	0.487	-1.469	3.833	4.431	0	1.049	0.963	0	9.536	8.758
PI3Kd_Y685A_apo	MKQGEALSKL	683	692	2	8	9.19	0.342	0.182	0.252	4.272	2.278	3.15	0.157	0.25	0	1.961	3.124	0	0.676	0.681	0	8.454	8.519	0
PI3Kd_Y685A_apo	KQGEALSKL	684	692	2	7	7.58	0.026	0.047	0.014	0.364	0.675	0.193	0.133	0.052	0.096	1.906	0.746	1.365	0.367	0.333	0.396	5.244	4.75	5.663
PI3Kd_Y685A_apo	KQGEALSKLKALND	684	697	3	12	8.77	0.108	0.235	0.118	0.903	1.958	0.984	0.232	0.168	0.242	1.932	1.398	2.02	0.581	0.452	0.454	4.844	3.769	3.784
PI3Kd_Y685A_apo	LSKLKALND	689	697	2	7	6.54	0.103	0.169	0.236	1.475	2.421	3.37	0.244	0.11	0.169	3.483	1.575	2.417	0.2	0.393	0.159	2.864	5.61	2.266
PI3Kd_Y685A_apo	SKLKALND	690	697	2	6	3.65	0.083	0.14	0.093	1.388	2.328	1.558	0.165	0.089	0.107	2.75	1.491	1.78	0.153	0.089	0.12	2.548	1.488	2.003
PI3Kd_Y685A_apo	SKLKALNDF	690	698	2	7	11.81	0.023	0.101	0.048	0.329	1.447	0.684	0.13	0.089	0.091	1.86	1.275	1.302	0.128	0.054	0.104	1.835	0.768	1.491
PI3Kd_Y685A_apo	FVKLSSQKTPKPQTKE	698	713	2	12	4.11	2.628	2.826	2.812	21.901	23.546	23.432	4.915	4.77	4.654	40.962	39.749	38.783	6.077	5.454	5.686	50.644	45.451	47.382
PI3Kd_Y685A_apo	FVKLSSQKTPKPQTKE	698	713	3	12	4.11	2.457	2.873	2.807	20.476	23.94	23.395	4.843	4.773	4.41	40.357	39.772	36.748	6.127	5.566	5.589	51.061	46.38	46.572
PI3Kd_Y685A_apo	FVKLSSQKTPKPQTKELMHL	698	717	4	16	9.92	1.62	1.837	1.844	10.123	11.479	11.522	2.873	2.826	2.49	17.956	17.664	15.564	3.672	3.268	3.266	22.953	20.422	20.411
PI3Kd_Y685A_apo	FVKLSSQKTPKPQTKELMHLCM	698	719	3	18	12.79	1.296	1.638	1.584	7.199	9.1	8.798	2.672	2.464	2.297	14.843	13.687	12.761	3.295	2.849	2.693	18.308	15.825	14.961
PI3Kd_Y685A_apo	VKLSSQKTPKPQTKE	699	713	3	11	1.8	2.705	3.11	3.036	24.593	28.269	27.596	5.449	5.042	4.985	49.533	45.841	45.322	6.636	5.776	6.121	60.329	52.509	55.646
PI3Kd_Y685A_apo	VKLSSQKTPKPQTKE	699	713	4	11	1.8	2.822	3.36	3.164	25.656	30.546	28.763	5.319	5.281	5.039	48.351	48.013	45.805	6.558	6.086	6.247	59.621	55.327	56.791
PI3Kd_Y685A_apo	RQEAYL	720	725	1	4	9.21	1.217	1.38	1.459	30.429	34.495	36.482	1.633	1.605	1.542	40.813	40.134	38.558	2.727	2.567	2.543	68.167	64.182	63.566
PI3Kd_Y685A_apo	RQEAYLEA	720	727	2	6	8.96	1.381	1.572	1.634	23.022	26.201	27.239	2.818	2.821	2.709	46.964	47.021	45.153	4.246	3.921	3.893	70.77	65.358	64.882
PI3Kd_Y685A_apo	EALSHLQSPLDPSTL	726	740	2	11	15.63	0.243	0.342	0.267	2.214	3.109	2.429	1.173	1.146	1.186	10.666	10.414	10.786	2.634	2.53	2.541	23.944	22.998	23.103
PI3Kd_Y685A_apo	EALSHLQSPLDPSTLL	726	741	2	12	18.61	0.255	0.269	0.199	2.129	2.245	1.661	1.158	1.105	1.16	9.652	9.208	9.67	2.658	2.528	2.586	22.146	21.064	21.548
PI3Kd_Y685A_apo	LSHLQSPLDPSTL	728	740	2	9	14.61	0.248	0.351	0.255	2.751	3.895	2.835	1.272	1.17	1.205	14.128	13.002	13.389	2.733	2.57	2.578	30.366	28.561	28.647
PI3Kd_Y685A_apo	LSHLQSPLDPSTLL	728	741	2	10	18.16	0.234	0.3	0.229	2.341	3	2.293	1.15	1.133	1.174	11.504	11.33	11.736	2.647	2.554	2.916	26.468	25.543	29.156
PI3Kd_Y685A_apo	LAEVCVE	741	747	1	5	9.97	1.147	1.1	1.096	22.946	21.992	21.929	1.797	1.71	1.71	35.931	34.201	34.2	2.05	1.92	1.942	41.005	38.402	38.834
PI3Kd_Y685A_apo	VCVEQCTF	744	751	1	6	15.13	1.096	1.264	1.23	18.261	21.07	20.499	2.136	2.238	2.236	35.596	37.305	37.268	3.154	3.228	2.893	52.562	53.799	48.216
PI3Kd_Y685A_apo	MDSKMKPLW	752	760	2	6	15.04	0	1.05	1.14	0	17.501	19.007	1.05	1.058	1.021	17.495	17.64	17.022	1.293	1.234	1.054	21.552	20.573	17.567
PI3Kd_Y685A_apo	MDSKMKPLWIM	752	762	2	8	19.31	0	0.816	0.848	0	10.194	10.602	0.879	0.821	0.767	10.989	10.263	9.583	1.065	0.928	0.881	13.31	11.597	11.008
PI3Kd_Y685A_apo	DSKMKPLW	753	760	2	5	14.85	0.549	0.839	0.921	10.982	16.779	18.413	0.91	0.883	0.842	18.199	17.655	16.838	1.151	1.073	0.927	23.029	21.454	18.53
PI3Kd_Y685A_apo	DSKMKPLWIM	753	762	3	7	19.37	0.57	0.76	0.712	8.136	10.855	10.175	0.756	0.662	0.89	10.807	9.462	12.721	0.98	0.8	0.898	14.004	11.431	12.827
PI3Kd_Y685A_apo	IMYSNE	761	766	1	4	6.46	1.219	1.403	1.38	30.478	35.086	34.495	1.638	1.607	1.524	40.961	40.185	38.097	2.294	2.088	2.104	57.36	52.189	52.598
PI3Kd_Y685A_apo	YSNEEAGSGGSVGIIFKNGDDLRQDM	763	788	3	24	16.81	0	4.316	4.374	0	17.983	18.224	6.183	5.911	5.942	25.764	24.629	24.756	8.262	7.406	7.277	34.425	30.857	30.319
PI3Kd_Y685A_apo	EAGSGGSVGIIFKNGDDL	767	784	2	16	16.49	1.779	2.1	2.222	11.118	13.123	13.885	2.64	2.63	2.411	16.5	16.439	15.069	3.59	3.171	3.003	22.438	19.821	18.768
PI3Kd_Y685A_apo	EAGSGGSVGIIFKNGDDLRQDM	767	788	2	20	16.38	2.188	2.585	2.102	10.938	12.927	10.509	4.29	4.297	4.025	21.45	21.484	20.123	6.185	0	5.684	30.924	0	28.418
PI3Kd_Y685A_apo	EAGSGGSVGIIFKNGDDLRQDMLT	767	790	3	22	17.66	2.03	2.186	1.864	9.227	9.936	8.474	4.013	4.141	3.884	18.241	18.823	17.654	5.044	5.42	5.397	22.926	24.635	24.531
PI3Kd_Y685A_apo	MDVLWKQEGLD	797	807	2	9	16.19	0	0.146	0.099	0	1.625	1.099	0	0.351	0.359	0	3.896	3.986	0	0.872	0.875	0	9.688	9.723
PI3Kd_Y685A_apo	MDVLWKQEGLDL	797	808	2	10	19.55	0	0.087	0.06	0	0.867	0.598	0.287	0.27	0.281	2.873	2.703	2.813	0.799	0.729	0.756	7.995	7.291	7.561
PI3Kd_Y685A_apo	DVLWKQEGLDL	798	808	2	9	18.63	0	0.063	0.009	0	0.699	0.1	0.379	0.314	0.271	4.207	3.488	3.007	0.956	0.777	0.823	10.617	8.63	9.14
PI3Kd_Y685A_apo	VLWKQEGLDL	799	808	2	8	17.63	0	0.108	0.067	0	1.354	0.839	0.357	0.29	0.309	4.463	3.63	3.862	0.925	0.834	0.761	11.563	10.429	9.507
PI3Kd_Y685A_apo	WKQEGLD	801	807	2	5	8.15	0.075	0.107	0.062	1.492	2.133	1.243	0.412	0.388	0.358	8.242	7.751	7.165	1.311	1.16	1.158	26.224	23.192	23.152
PI3Kd_Y685A_apo	WKQEGLDL	801	808	2	6	14.9	0.468	0.066	0.012	7.806	1.096	0.2	0.324	0.277	0.252	5.401	4.624	4.2	0.965	0.822	0.818	16.076	13.692	13.635
PI3Kd_Y685A_apo	LRMTPYGCLPTGDRTGL	808	824	3	13	15.28	0.416	0.583	0.484	3.201	4.488	3.723	0.621	0	0.53	4.776	0	4.078	1.133	0.936	0.933	8.718	7.204	7.175
PI3Kd_Y685A_apo	LRMTPYGCLPTGDRTGLIE	808	826	3	15	16	0.328	0.549	0.518	2.189	3.658	3.454	0.589	0.476	0.517	3.923	3.172	3.445	1.082	0.882	0.892	7.213	5.878	5.943
PI3Kd_Y685A_apo	RMTPYGCLPTGDRTGL	809	824	3	12	13.91	0.402	0.637	0.619	3.351	5.307	5.154	0.663	0.637	0.51	5.526	5.307	4.253	1.136	0.851	0.894	9.47	7.094	7.448
PI3Kd_Y685A_apo	RMTPYGCLPTGDRTGLIE	809	826	3	14	14.7	0.443	0.64	0.492	3.162	4.57	3.514	0.671	0.621	0.591	4.792	4.433	4.223	1.148	0.951	0.949	8.199	6.79	6.778
PI3Kd_Y685A_apo	TPYGCLPTGDRTGLIE	811	826	2	13	14.73	0	0.756	0.643	0	5.815	4.947	1.104	0.918	0.609	8.495	7.064	4.685	1.546	1.043	0.875	11.892	8.022	6.73
PI3Kd_Y685A_apo	VVLRSDTIA	827	835	1	7	8.22	1.109	1.199	1.145	15.844	17.125	16.351	2.002	1.98	1.979	28.599	28.282	28.27	2.534	2.366	2.366	36.2	33.8	33.793
PI3Kd_Y685A_apo	VVLRSDTIA	827	835	2	7	8.22	1.229	1.22	1.18	17.561	17.43	16.858	2.035	1.93	1.92	29.071	27.571	27.434	2.507	2.382	2.316	35.815	34.032	33.089
PI3Kd_Y685A_apo	VVLRSDTIAN	827	836	1	8	6.94	1.167	1.303	1.263	14.593	16.292	15.788	2.13	2.024	2.106	26.626	25.297	26.323	2.812	2.636	2.584	35.153	32.949	32.297
PI3Kd_Y685A_apo	VVLRSDTIAN	827	836	2	8	6.94	1.101	1.274	1.238	13.76	15.931	15.478	2.123	2.039	2.082	26.543	25.482	26.021	2.729	2.58	2.569	34.112	32.249	32.107
PI3Kd_Y685A_apo	VVLRSDTIANIQL	827	839	2	11	16.8	1.103	1.221	1.168	10.026	11.103	10.619	2.384	2.337	2.263	21.674	21.247	20.571	3.785	3.504	3.543	34.405	31.853	32.207
PI3Kd_Y685A_apo	VLRSDTIANIQL	828	839	2	10	16.35	0.523	0.173	0.128	5.232	1.728	1.279	1.059	0.839	0.715	10.59	8.394	7.145	2.582	1.887	2.295	25.817	18.874	22.947
PI3Kd_Y685A_apo	RSDTIANIQL	830	839	2	8	15.21	0.145	0.186	0.133	1.81	2.326	1.66	0.678	0.677	0.67	8.477	8.462	8.37	1.787	1.684	1.709	22.335	21.049	21.364
PI3Kd_Y685A_apo	IANIQL	834	839	1	4	14.45	0.032	0.027	0.086	0.788	0.668	2.158	0.59	0.57	0.529	14.75	14.245	13.222	1.636	1.629	1.556	40.91	40.714	38.893
PI3Kd_Y685A_apo	AATAAFNKDAL	845	855	2	9	10.88	5.44	6.621	6.339	60.444	73.57	70.429	7.142	7.183	7.125	79.352	79.808	79.169	7.373	6.979	6.621	81.919	77.542	73.568
PI3Kd_Y685A_apo	AATAAFNKDALL	845	856	2	10	14.33	5.035	5.764	6.202	50.354	57.64	62.017	6.772	6.694	6.551	67.719	66.944	65.512	7.098	6.838	6.374	70.983	68.385	63.743
PI3Kd_Y685A_apo	AATAAFNKDALLNWLKSKNPGEAL	845	868	4	21	19.18	0	7.006	7.172	0	33.361	34.151	9.773	9.713	9.514	46.539	46.251	45.304	11.665	11.235	11.056	55.546	53.498	52.646
PI3Kd_Y685A_apo	FNKDALL	850	856	2	5	12.91	1.655	1.862	1.934	33.097	37.24	38.681	2.736	2.711	2.575	54.711	54.211	51.499	3.01	2.717	2.653	60.209	54.344	53.052
PI3Kd_Y685A_apo	FNKDALLNWLKSKNPGEAL	850	868	3	16	18.94	4.15	4.207	4.255	25.939	26.296	26.595	6.716	6.881	6.821	41.977	43.005	42.631	8.594	8.338	8.366	53.711	52.113	52.289
PI3Kd_Y685A_apo	FNKDALLNWLKSKNPGEALDRAIEE	850	874	4	22	19.72	4.377	0	4.627	19.896	0	21.033	7.911	7.953	7.963	35.959	36.15	36.198	9.733	9.628	9.604	44.242	43.763	43.657
PI3Kd_Y685A_apo	NKDALL	851	856	1	4	9.27	0.908	1.112	1.159	22.708	27.804	28.981	1.921	1.823	1.722	48.036	45.57	43.047	2.162	1.961	2.015	54.041	49.013	50.368
PI3Kd_Y685A_apo	NKDALLNWLKSKNPGEAL	851	868	3	15	17.73	3.142	3.38	3.338	20.949	22.53	22.254	5.643	5.744	5.781	37.623	38.296	38.542	7.55	7.196	7.227	50.33	47.975	48.18
PI3Kd_Y685A_apo	NKDALLNWLKSKNPGEALDRAIEE	851	874	4	21	18.6	3.338	3.646	3.335	15.896	17.364	15.879	6.581	6.944	6.717	31.339	33.068	31.984	8.76	8.703	8.987	41.714	41.441	42.796
PI3Kd_Y685A_apo	LNWLKSKNPGEAL	856	868	3	10	14.14	2.284	2.406	2.443	22.843	24.061	24.43	3.66	3.69	3.676	36.605	36.899	36.755	4.299	4.06	3.806	42.987	40.605	38.058
PI3Kd_Y685A_apo	LNWLKSKNPGEALDRAIEE	856	874	3	16	15.5	2.877	2.789	2.715	17.978	17.432	16.971	4.784	5.003	4.796	29.899	31.272	29.972	4.861	5.368	5.282	30.379	33.548	33.013
PI3Kd_Y685A_apo	NWLKSKNPGEAL	857	868	2	9	12.34	0	2.484	2.386	0	27.604	26.511	3.7	3.741	3.71	41.106	41.571	41.226	4.234	4.009	3.927	47.042	44.543	43.635
PI3Kd_Y685A_apo	NWLKSKNPGEALDRA	857	871	3	12	10.8	2.572	2.877	2.783	21.436	23.975	23.19	4.87	4.843	4.857	40.583	40.357	40.475	5.617	5.093	5.373	46.812	42.446	44.772
PI3Kd_Y685A_apo	NWLKSKNPGEALDRAIEE	857	874	3	15	14.28	2.573	2.541	3.75	17.151	16.939	25.002	5.571	4.421	4.086	37.139	29.475	27.242	6.397	5.415	4.674	42.649	36.102	31.162
PI3Kd_Y685A_apo	DRAIEE	869	874	1	4	2.61	-0.016	-0.003	-0.004	-0.398	-0.073	-0.091	0.101	0.007	-0.002	2.537	0.18	-0.057	0.12	0.013	-0.003	2.998	0.335	-0.083
PI3Kd_Y685A_apo	DRAIEEF	869	875	2	5	11.84	0	0.013	0	0	0.257	0	0.009	0	0	0.171	0	0	0.002	0.01	0	0.036	0.193	0
PI3Kd_Y685A_apo	FTLSCAG	875	881	1	5	13.22	0.007	0.022	0.013	0.14	0.448	0.25	0.031	-0.009	0.02	0.628	-0.185	0.392	0.02	0.009	0.02	0.402	0.182	0.409
PI3Kd_Y685A_apo	FTLSCAGY	875	882	1	6	17.1	0.061	-0.045	-0.032	1.021	-0.749	-0.54	-0.027	-0.06	-0.019	-0.449	-0.996	-0.313	0.095	-0.024	-0.032	1.586	-0.401	-0.527
PI3Kd_Y685A_apo	TLSCAG	876	881	1	4	4.44	-0.003	0.155	0.145	-0.079	3.881	3.63	0.018	0.155	0.289	0.448	3.882	7.226	0.161	0.212	0.03	4.024	5.306	0.76
PI3Kd_Y685A_apo	TYVLGIGDRHSDN	886	898	2	11	10.73	0.372	0.478	0.506	3.378	4.347	4.596	1.163	1.11	0.995	10.575	10.086	9.048	1.49	1.274	1.2	13.546	11.584	10.909
PI3Kd_Y685A_apo	YVLGIGDRHSDN	887	898	3	10	9.91	0.243	0.414	0.403	2.426	4.143	4.032	1.015	0.991	0.913	10.146	9.914	9.132	1.421	1.241	1.176	14.206	12.415	11.764
PI3Kd_Y685A_apo	YVLGIGDRHSDNIM	887	900	3	12	14.35	0.161	0.245	0.215	1.341	2.039	1.788	0.655	0.62	0.581	5.461	5.171	4.843	0.965	0.817	0.779	8.042	6.808	6.494
PI3Kd_Y685A_apo	IRESGQL	901	907	2	5	5.43	0.099	0.17	0.121	1.971	3.397	2.428	0.462	0.409	0.396	9.247	8.185	7.926	1.156	0.989	0.984	23.117	19.777	19.675
PI3Kd_Y685A_apo	IRESGQLFHIDF	901	912	3	10	19.1	0	0.121	0.062	0	1.207	0.622	0.193	0.161	0.165	1.927	1.608	1.646	0.504	0.363	0.357	5.039	3.634	3.57
PI3Kd_Y685A_apo	IRESGQLFHIDFGHF	901	915	3	13	19.25	0	0.472	0.417	0	3.627	3.208	1.161	1.109	1.028	8.929	8.533	7.91	1.522	1.298	0	11.71	9.982	0
PI3Kd_Y685A_apo	IRESGQLFHIDFGHFLGNF	901	919	4	17	20.78	1.577	1.777	1.61	9.274	10.455	9.47	3.606	3.574	3.444	21.213	21.025	20.261	4.416	4.148	4.083	25.976	24.399	24.017
PI3Kd_Y685A_apo	FHIDFGHF	908	915	1	6	18.5	0.197	0.383	0.388	3.286	6.38	6.473	1.146	1.079	1.046	19.107	17.976	17.43	1.483	1.374	1.316	24.724	22.906	21.933
PI3Kd_Y685A_apo	FHIDFGHFLGNF	908	919	3	10	20.9	0	1.576	1.462	0	15.756	14.619	3.434	3.385	3.298	34.343	33.854	32.975	4.194	3.964	3.885	41.939	39.635	38.848
PI3Kd_Y685A_apo	HIDFGHF	909	915	2	5	14.46	0.272	0.455	0.327	5.448	9.106	6.546	1.273	1.189	1.088	25.468	23.778	21.762	1.641	1.303	1.372	32.822	26.056	27.444
PI3Kd_Y685A_apo	HIDFGHFLGNF	909	919	2	9	20.35	1.443	2.035	1.598	16.03	22.608	17.751	3.473	3.521	3.392	38.586	39.122	37.693	4.278	3.852	4.114	47.537	42.8	45.713
PI3Kd_Y685A_apo	LGNFKTKFGINRERVPFIL	916	934	4	16	16.87	3.64	3.132	3.328	22.752	19.575	20.803	4.332	3.968	3.862	27.073	24.798	24.139	5.766	5.057	4.766	36.036	31.607	29.787
PI3Kd_Y685A_apo	RERVPFIL	927	934	2	5	16.95	0.404	0.483	0.521	8.076	9.655	10.413	1.332	1.354	1.172	26.649	27.08	23.44	2.448	2.318	2.228	48.963	46.362	44.557
PI3Kd_Y685A_apo	YDFVHVIQQGKTNNSEKF	936	953	3	16	13.94	0	4.118	4.501	0	25.734	28.132	4.615	5.084	0	28.846	31.773	0	5.381	5.493	4.792	33.633	34.332	29.949
PI3Kd_Y685A_apo	YDFVHVIQQGKTNNSEKFERFRG	936	958	3	21	12.98	2.535	3.233	3.453	12.071	15.395	16.441	4.516	4.642	4.124	21.506	22.106	19.64	6.106	5.545	5.496	29.076	26.403	26.171
PI3Kd_Y685A_apo	FVHVIQQGKTNNSEKFERF	938	956	4	17	10.35	1.822	2.286	2.342	10.717	13.45	13.779	3.705	3.49	3.239	21.797	20.528	19.05	4.719	4.242	3.918	27.757	24.952	23.044
PI3Kd_Y685A_apo	FVHVIQQGKTNNSEKFERFRG	938	958	4	19	8.53	1.647	2.142	2.132	8.668	11.271	11.224	3.416	3.342	2.857	17.978	17.589	15.036	4.354	3.836	3.764	22.914	20.187	19.81
PI3Kd_Y685A_apo	VHVIQQGKTNNSEKFERFRG	939	958	3	18	6.86	1.868	2.351	2.515	10.379	13.059	13.972	3.857	3.622	3.25	21.426	20.122	18.056	5.137	4.354	4.177	28.541	24.187	23.206
PI3Kd_Y685A_apo	HVIQQGKTNNSEKFERFRG	940	958	4	17	6.09	2.252	2.648	2.377	13.246	15.574	13.984	4.227	3.686	3.37	24.863	21.682	19.826	5.067	4.627	4.236	29.808	27.216	24.92
PI3Kd_Y685A_apo	RGYCERA	957	963	2	5	2.45	0.061	0.063	0.08	1.213	1.252	1.605	0.131	0.068	0.097	2.613	1.35	1.931	0.135	0.054	0.165	2.693	1.082	3.302
PI3Kd_Y685A_apo	RAYTIL	962	967	1	4	13.16	-0.042	0.077	0.025	-1.039	1.922	0.626	0.01	-0.034	0.029	0.259	-0.861	0.718	0.005	-0.065	-0.015	0.125	-1.617	-0.386
PI3Kd_Y685A_apo	YTILRRHGLLF	964	974	2	9	15.8	0.349	0.41	0.405	3.877	4.559	4.502	0.766	0.723	0.677	8.51	8.036	7.522	1.207	1.063	1.005	13.406	11.813	11.166
PI3Kd_Y685A_apo	ILRRHGLL	966	973	2	6	7.22	0.338	0.401	0.369	5.625	6.675	6.147	0.985	0.708	0.639	16.417	11.802	10.655	1.153	1.02	0.968	19.218	17.007	16.14
PI3Kd_Y685A_apo	ILRRHGLLF	966	974	2	7	13.57	0.282	0.249	0.404	4.026	3.562	5.776	0.652	0.615	0.623	9.317	8.789	8.904	1.044	0.817	0.842	14.914	11.678	12.027
PI3Kd_Y685A_apo	FALMRAAGL	978	986	2	7	17.04	1.162	0.702	0.573	16.604	10.032	8.185	2.479	2.407	2.369	35.418	34.39	33.844	4.268	4.097	4.162	60.976	58.534	59.463
PI3Kd_Y685A_apo	FALMRAAGLPEL	978	989	2	9	19.8	0.742	0.956	0.658	8.246	10.621	7.317	3.141	3.15	2.979	34.896	35.003	33.104	5.486	5.284	5.231	60.956	58.711	58.119
PI3Kd_Y685A_apo	RAAGLPEL	982	989	2	5	13.32	0	0.634	0.456	0	12.689	9.125	2.236	2.217	2.14	44.728	44.345	42.806	3.958	3.826	3.825	79.157	76.512	76.503
PI3Kd_Y685A_apo	RAAGLPELSC	982	991	2	7	13.04	1.889	1.955	1.953	26.983	27.93	27.897	3.984	3.894	3.839	56.91	55.625	54.839	5.67	5.443	5.446	80.995	77.759	77.802
PI3Kd_Y685A_apo	PELSCSKDIQY	987	997	2	9	12.18	2.327	2.598	2.691	25.859	28.864	29.9	4.888	4.9	4.708	54.312	54.441	52.312	5.693	5.052	4.833	63.259	56.137	53.695
PI3Kd_Y685A_apo	PELSCSKDIQYLKD	987	1000	3	12	12.53	1.571	2.054	1.909	13.095	17.117	15.907	4.213	4.338	4.175	35.112	36.146	34.789	5.643	5.237	5.257	47.029	43.641	43.807
PI3Kd_Y685A_apo	SCSKDIQY	990	997	2	6	7.04	1.617	1.87	1.85	26.952	31.166	30.828	3.724	3.859	3.433	62.062	64.323	57.218	4.092	3.865	3.79	68.199	64.423	63.163
PI3Kd_Y685A_apo	SCSKDIQYLKD	990	1000	3	9	8.41	1.32	1.563	1.446	14.668	17.372	16.064	3.59	3.419	3.535	39.89	37.992	39.282	4.916	4.254	4.421	54.617	47.27	49.124
PI3Kd_Y685A_apo	SCSKDIQYLKDSL	990	1002	3	11	15.43	1.955	1.683	1.366	17.77	15.299	12.417	3.529	3.483	3.672	32.08	31.659	33.386	4.58	4.216	3.899	41.636	38.331	35.446
PI3Kd_Y685A_apo	SKDIQYLKDSL	992	1002	2	9	12.78	1.113	0.972	0.98	12.368	10.798	10.886	2.535	2.518	2.38	28.165	27.981	26.441	3.846	3.44	3.478	42.734	38.227	38.645
PI3Kd_Y685A_apo	IQYLKDSL	995	1002	2	6	13.15	0.454	0.529	0.649	7.563	8.823	10.823	0.942	0.913	0.869	15.692	15.221	14.475	1.806	1.533	1.482	30.102	25.548	24.696
PI3Kd_Y685A_apo	LKDSLALGKTEEEALKHFRVKF	998	1019	5	20	16.51	2.46	2.572	2.651	12.301	12.858	13.255	3.5	4.223	3.608	17.499	21.113	18.041	5.775	5.397	5.31	28.875	26.985	26.551
PI3Kd_Y685A_apo	SLALGKTEE	1001	1009	2	7	7.18	2.592	2.804	2.795	37.023	40.063	39.929	0	3.496	3.449	0	49.944	49.278	4.522	4.267	4.256	64.603	60.954	60.799
PI3Kd_Y685A_apo	SLALGKTEEE	1001	1010	2	8	7.45	2.317	2.722	2.744	28.959	34.028	34.3	3.839	3.622	3.474	47.984	45.271	43.425	4.772	4.668	4.58	59.646	58.351	57.253
PI3Kd_Y685A_apo	SLALGKTEEEALKHFRVKF	1001	1019	4	17	16.61	2.071	2.343	2.289	12.18	13.781	13.464	3.027	3.187	3.054	17.807	18.745	17.962	4.544	4.276	4.553	26.727	25.153	26.783
PI3Kd_Y685A_apo	SLALGKTEEEALKHFRVKFNE	1001	1021	4	19	16.01	2.169	2.347	2.338	11.415	12.353	12.307	3.212	3.331	3.158	16.908	17.533	16.621	5.179	4.914	4.898	27.257	25.864	25.781
PI3Kd_Y685A_apo	SLALGKTEEEALKHFRVKFNEA	1001	1022	3	20	16.1	0	2.396	2.297	0	11.978	11.483	3.334	3.215	3.912	16.668	16.076	19.56	6.61	4.698	5.042	33.048	23.489	25.208
PI3Kd_Y685A_apo	SLALGKTEEEALKHFRVKFNEAL	1001	1023	4	21	17.9	1.789	2.36	2.254	8.519	11.237	10.736	3.219	3.342	3.261	15.327	15.912	15.531	6.06	5.64	5.587	28.859	26.859	26.604
PI3Kd_Y685A_apo	ALGKTEEEALKHFRVKF	1003	1019	4	15	14.69	2.441	1.806	1.756	16.272	12.038	11.709	2.931	2.509	2.064	19.541	16.728	13.759	3.375	3.787	3.287	22.502	25.244	21.911
PI3Kd_Y685A_apo	ALGKTEEEALKHFRVKFNE	1003	1021	4	17	14.42	1.642	2	1.917	9.66	11.765	11.278	2.652	2.803	2.433	15.6	16.489	14.313	4.303	3.807	3.873	25.314	22.394	22.781
PI3Kd_Y685A_apo	ALGKTEEEALKHFRVKFNEA	1003	1022	4	18	14.16	1.619	1.899	1.898	8.992	10.551	10.543	2.601	2.72	2.507	14.451	15.112	13.93	4.189	3.805	4.021	23.273	21.139	22.338
PI3Kd_Y685A_apo	ALGKTEEEALKHFRVKFNEAL	1003	1023	3	19	16.31	1.322	1.716	1.999	6.955	9.034	10.523	2.683	2.761	2.542	14.123	14.531	13.381	4.885	4.586	4.205	25.711	24.135	22.129
PI3Kd_Y685A_apo	EALKHFRVKF	1010	1019	3	8	10.54	-0.017	0.003	-0.003	-0.212	0.043	-0.043	0.067	0.005	0.011	0.84	0.065	0.141	0.276	0.214	0.249	3.451	2.672	3.106
PI3Kd_Y685A_apo	EALKHFRVKFNE	1010	1021	3	10	9.46	-0.001	0.062	0.009	-0.008	0.617	0.092	0.151	0.091	0.096	1.505	0.908	0.963	0.627	0.45	0.48	6.273	4.502	4.801
PI3Kd_Y685A_apo	EALKHFRVKFNEA	1010	1022	2	11	9.53	0	1.188	1.091	0	10.802	9.921	2.406	2.379	1.748	21.871	21.628	15.892	3.594	3.126	2.798	32.673	28.421	25.433
PI3Kd_Y685A_apo	EALKHFRVKFNEAL	1010	1023	3	12	12.38	0.074	0.092	0.049	0.62	0.765	0.405	0.268	0.21	0.217	2.237	1.75	1.81	1.344	1.153	1.103	11.2	9.605	9.188
PI3Kd_Y685A_apo	ALKHFRVKFNE	1011	1021	3	9	8.82	0.033	0.116	0.018	0.369	1.29	0.196	0.03	0.081	0.036	0.331	0.895	0.401	0.32	0.33	0.298	3.551	3.668	3.31
PI3Kd_Y685A_apo	ALKHFRVKFNEAL	1011	1023	3	11	11.52	0	0.112	0.103	0	1.02	0.939	0.247	0.178	0.221	2.246	1.622	2.008	1.074	0.887	0.957	9.767	8.065	8.704
PI3Kd_Y685A_apo	ALRESWKTKVNWLAHNVSKDNRQ	1022	1044	5	21	12	9.931	10.991	11.5	47.29	52.337	54.764	12.086	12.816	11.528	57.551	61.03	54.897	12.285	11.598	11.859	58.5	55.229	56.47
PI3Kd_Y685A_apo	LRESWKTKVNW	1023	1033	3	9	12.25	3.591	4.139	4.252	39.903	45.987	47.24	4.722	4.636	4.407	52.466	51.513	48.962	4.841	4.468	4.216	53.786	49.646	46.847
PI3Kd_Y685A_apo	LRESWKTKVNWLAHNVSKDNRQ	1023	1044	5	20	11.48	9.003	9.899	10.107	45.015	49.496	50.535	10.976	11.034	10.833	54.878	55.171	54.165	11.186	10.717	10.698	55.931	53.585	53.491
PI3Kd_Y685A_apo	RESWKTKVNW	1024	1033	3	8	11.85	3.603	4.05	4.146	45.042	50.628	51.827	4.523	4.53	4.446	56.542	56.62	55.571	4.75	4.4	4.311	59.375	54.997	53.883
PI3Kd_Y685A_apo	RESWKTKVNWLAHNVSKDNRQ	1024	1044	4	19	10.98	10.456	10.397	10.795	55.031	54.72	56.814	11.217	11.585	11.088	59.038	60.974	58.356	11.536	11.009	11.152	60.715	57.94	58.693
PI3Kd_Y685A_apo	RESWKTKVNWLAHNVSKDNRQ	1024	1044	5	19	10.98	10.944	10.552	10.744	57.602	55.539	56.549	11.272	11.54	11.016	59.324	60.738	57.977	11.774	11.346	11.085	61.967	59.714	58.341
PI3Kd_Y685A_apo	SWKTKVNWLAHNVSKDNRQ	1026	1044	4	17	11.8	10.786	10.047	10.624	63.448	59.099	62.492	10.739	11.03	10.942	63.168	64.88	64.367	11.671	11.052	11.6	68.65	65.009	68.238
PI3Kd_Y685A_apo	SWKTKVNWLAHNVSKDNRQ	1026	1044	5	17	11.8	10.833	10.773	10.334	63.722	63.369	60.79	11.789	11.518	11.186	69.348	67.751	65.803	11.729	10.983	11.104	68.992	64.607	65.32
PI3Kd_Y685A_apo	KTKVNWLAHNVSKDNRQ	1028	1044	4	15	6	6.099	6.772	7.06	40.66	45.149	47.068	7.387	7.396	7.03	49.245	49.308	46.867	7.557	7.08	7.046	50.379	47.197	46.975
PI3Kd_WT_roginolisib	FWTKEENQS	11	19	2	7	7.92	4.635	4.62	0	66.212	65.996	0	4.89	4.546	4.543	69.856	64.937	64.901	4.777	4.459	4.357	68.246	63.705	62.244
PI3Kd_WT_roginolisib	WTKEENQS	12	19	2	6	1.85	4.321	4.28	0	72.013	71.34	0	4.822	4.365	3.987	80.369	72.748	66.453	4.451	4.39	4.127	74.187	73.167	68.779
PI3Kd_WT_roginolisib	WTKEENQSV	12	20	1	7	5.85	4.375	4.232	0	62.496	60.459	0	4.482	4.538	4.175	64.022	64.836	59.646	4.931	4.682	4.713	70.445	66.891	67.324
PI3Kd_WT_roginolisib	WTKEENQSVV	12	21	2	8	8.05	3.866	3.676	0	48.328	45.955	0	4.536	4.19	3.96	56.7	52.371	49.506	5.431	5.09	5.143	67.893	63.619	64.291
PI3Kd_WT_roginolisib	WTKEENQSVVVD	12	23	2	10	8.33	4.12	3.993	0	41.195	39.929	0	4.844	4.626	4.397	48.442	46.264	43.968	5.662	5.154	5.271	56.624	51.542	52.715
PI3Kd_WT_roginolisib	VVDFLLPTGVY	21	31	1	8	21.11	-0.084	0.144	0	-1.045	1.8	0	0.12	0.21	0.236	1.5	2.629	2.955	0.725	0.778	1.434	9.062	9.73	17.93
PI3Kd_WT_roginolisib	FLLPTGV	24	30	1	4	18.18	0.216	0.081	0	5.392	2.029	0	0.584	0.392	0.395	14.61	9.808	9.869	1.15	1.032	1.073	28.743	25.804	26.82
PI3Kd_WT_roginolisib	FLLPTGVY	24	31	1	5	19.59	0.075	0.228	0	1.49	4.551	0	0.46	0.504	0.396	9.206	10.074	7.92	1.054	1.107	0.993	21.086	22.131	19.869
PI3Kd_WT_roginolisib	YLNFPVSRNANL	31	42	2	9	15.63	1.947	1.923	0	21.629	21.372	0	3.07	3.052	2.906	34.109	33.913	32.286	3.281	3.103	3.25	36.453	34.475	36.107
PI3Kd_WT_roginolisib	LNFPVSRNANL	32	42	2	8	13.59	1.431	1.388	0	17.883	17.352	0	2.484	2.484	2.369	31.046	31.054	29.616	2.756	2.581	2.654	34.455	32.267	33.173
PI3Kd_WT_roginolisib	LNFPVSRNANLST	32	44	2	10	12.39	1.304	1.348	0	13.04	13.478	0	2.739	2.551	2.411	27.389	25.513	24.11	4.257	3.588	3.634	42.569	35.883	36.34
PI3Kd_WT_roginolisib	PVSRNANL	35	42	2	6	4.51	1.664	1.568	0	27.726	26.136	0	3.095	2.92	2.754	51.592	48.674	45.9	3.323	3.039	3.124	55.377	50.657	52.073
PI3Kd_WT_roginolisib	STIKQLL	43	49	2	5	13.27	0.022	0	0	0.442	-0.006	0	0.029	-0.038	0.003	0.584	-0.756	0.069	0.038	0.058	0.014	0.77	1.151	0.283
PI3Kd_WT_roginolisib	STIKQLLWHRAQYEPLF	43	59	3	14	18.36	0.605	0.535	0	4.324	3.82	0	1.395	1.374	1.347	9.968	9.813	9.618	2.678	2.61	2.616	19.131	18.642	18.686
PI3Kd_WT_roginolisib	STIKQLLWHRAQYEPLFHMLSGPEA	43	67	3	21	19.44	2.742	2.588	0	13.058	12.324	0	4.916	5.13	4.888	23.412	24.429	23.274	7.01	6.644	6.894	33.38	31.638	32.827
PI3Kd_WT_roginolisib	LLWHRAQYEPLF	48	59	2	9	18.7	0.567	0	0	6.304	0	0	1.351	1.624	1.341	15.012	18.042	14.9	2.386	2.287	2.29	26.515	25.409	25.447
PI3Kd_WT_roginolisib	HMLSGPEA	60	67	2	5	6.4	1.524	1.442	0	30.489	28.845	0	2.435	2.355	2.198	48.701	47.09	43.97	3.082	0	2.824	61.646	0	56.488
PI3Kd_WT_roginolisib	TCINQTAEQQEL	71	82	2	10	10.21	1.067	1.193	0	10.666	11.926	0	2.686	2.579	2.634	26.857	25.793	26.343	3.324	3.265	3.289	33.241	32.651	32.893
PI3Kd_WT_roginolisib	TCINQTAEQQELEDEQRRLCDVQPFL	71	96	3	23	20.05	3.86	3.787	0	16.781	16.463	0	7.961	7.713	7.636	34.613	33.533	33.2	10.305	10.062	10.273	44.804	43.746	44.667
PI3Kd_WT_roginolisib	EDEQRRLCDVQPFL	83	96	2	11	17.2	0.703	0.624	0	6.392	5.67	0	2.16	2.085	2.02	19.639	18.955	18.36	3.674	3.453	3.443	33.398	31.389	31.298
PI3Kd_WT_roginolisib	EQRRLCDVQPFL	85	96	2	9	16.52	0.592	0.403	0	6.583	4.481	0	1.637	1.454	1.625	18.188	16.161	18.057	2.717	2.57	2.481	30.187	28.558	27.572
PI3Kd_WT_roginolisib	QRRLCDVQPFLPVLRLV	86	102	3	13	9.83	-0.007	0.24	0	-0.055	1.847	0	1.368	1.125	0.961	10.524	8.657	7.392	1.94	1.555	1.994	14.924	11.96	15.342
PI3Kd_WT_roginolisib	RRLCDVQPFLPVLRL	87	101	3	11	20.63	0.187	0.239	0	1.703	2.175	0	1.281	1.294	0.766	11.643	11.767	6.965	2.175	1.762	0	19.771	16.02	0
PI3Kd_WT_roginolisib	VQPFLPVLRL	92	101	2	6	20.96	0.07	0.146	0	1.164	2.439	0	0.157	0.092	0.128	2.615	1.532	2.136	0.762	0.713	0.825	12.708	11.882	13.745
PI3Kd_WT_roginolisib	RLVAREGDRVKKLINSQISLL	100	120	3	19	15.26	6.837	7.493	0	35.982	39.435	0	8.73	8.351	8.654	45.945	43.952	45.546	9.155	8.629	9.244	48.184	45.418	48.654
PI3Kd_WT_roginolisib	VAREGDRVKKLINS	102	115	2	12	6.04	6.957	7.324	0	57.975	61.035	0	0	7.313	7.501	0	60.941	62.512	7.331	7.137	6.814	61.092	59.477	56.787
PI3Kd_WT_roginolisib	VAREGDRVKKLINSQ	102	116	2	13	6.59	7.332	7.242	0	56.396	55.711	0	7.759	7.888	7.941	59.684	60.675	61.082	7.874	8.18	8.609	60.572	62.923	66.227
PI3Kd_WT_roginolisib	VAREGDRVKKLINSQISL	102	119	3	16	12.72	6.288	6.344	0	39.301	39.653	0	7.618	7.006	7.142	47.611	43.789	44.639	7.578	7.682	7.863	47.362	48.012	49.145
PI3Kd_WT_roginolisib	VAREGDRVKKLINSQISLL	102	120	2	17	15.69	6.696	5.95	0	39.39	34.999	0	7.123	6.888	7.157	41.903	40.516	42.098	8.087	7.346	8.283	47.569	43.213	48.726
PI3Kd_WT_roginolisib	LIGKGLHE	120	127	2	6	5.27	0.709	0.58	0	11.81	9.659	0	1.238	1.083	1.031	20.627	18.049	17.19	2.338	2.273	2.295	38.972	37.885	38.25
PI3Kd_WT_roginolisib	LIGKGLHEFDSL	120	131	2	10	15.17	0.807	0.728	0	8.073	7.279	0	2.333	2.39	2.198	23.334	23.896	21.977	3.239	3.034	2.938	32.395	30.339	29.377
PI3Kd_WT_roginolisib	LIGKGLHEFDSLCDPEVND	120	138	3	16	17	1.793	1.889	0	11.205	11.804	0	4.085	3.799	3.793	25.531	23.742	23.704	5.029	4.699	4.855	31.434	29.37	30.343
PI3Kd_WT_roginolisib	LIGKGLHEFDSLCDPEVNDF	120	139	3	17	19.29	1.998	1.858	0	11.75	10.932	0	3.406	3.57	3.481	20.033	21	20.475	4.891	4.554	4.69	28.773	26.791	27.59
PI3Kd_WT_roginolisib	IGKGLHE	121	127	1	5	2.42	0.711	0.646	0	14.222	12.924	0	1.324	1.159	0.939	26.48	23.189	18.774	2.701	2.252	2.284	54.026	45.047	45.673
PI3Kd_WT_roginolisib	IGKGLHEF	121	128	2	6	9.35	0.222	0.208	0	3.701	3.463	0	0.815	0.734	0.615	13.586	12.238	10.257	1.512	1.176	1.241	25.204	19.606	20.682
PI3Kd_WT_roginolisib	IGKGLHEFDSL	121	131	2	9	13.9	0.74	0.703	0	8.223	7.814	0	2.244	2.184	2.058	24.933	24.267	22.868	2.84	2.583	0	31.554	28.705	0
PI3Kd_WT_roginolisib	IGKGLHEFDSLCDPEVND	121	138	3	15	16.05	1.97	0	0	13.132	0	0	3.472	3.339	3.486	23.15	22.259	23.238	4.762	4.244	4.946	31.744	28.292	32.972
PI3Kd_WT_roginolisib	GKGLHE	122	127	1	4	2.43	0.533	0.47	0	13.321	11.744	0	1.142	0.874	0.773	28.553	21.84	19.324	2.201	1.765	1.737	55.035	44.113	43.426
PI3Kd_WT_roginolisib	FDSLCDPEVNDF	128	139	1	9	18.84	0.854	0.802	0	9.49	8.907	0	1.543	1.47	1.364	17.146	16.338	15.151	2.266	2.078	2.231	25.173	23.084	24.788
PI3Kd_WT_roginolisib	CDPEVND	132	138	1	4	3.32	0.138	0.088	0	3.447	2.203	0	0.271	0.241	0.239	6.774	6.035	5.972	1.256	1.087	1.13	31.399	27.181	28.25
PI3Kd_WT_roginolisib	CDPEVNDF	132	139	1	5	12.52	0.14	0.11	0	2.796	2.206	0	0.303	0.216	0.215	6.06	4.32	4.293	1.057	0.89	0.897	21.13	17.808	17.944
PI3Kd_WT_roginolisib	PEVNDF	134	139	1	4	11.67	0.068	0.067	0	1.704	1.674	0	0.138	0.065	-0.016	3.446	1.627	-0.393	0.419	0.391	0.299	10.482	9.784	7.482
PI3Kd_WT_roginolisib	FRAKMCQF	139	146	2	6	12.21	0.082	0.064	0	1.368	1.074	0	0	0.572	0.533	0	9.535	8.881	1.621	1.436	0	27.023	23.934	0
PI3Kd_WT_roginolisib	FCEEAAARRQQLGWEAW	146	162	3	15	18.19	1.575	1.512	0	10.501	10.082	0	3.602	3.422	3.375	24.011	22.812	22.501	6.869	6.433	6.47	45.791	42.887	43.133
PI3Kd_WT_roginolisib	CEEAAARRQQLGWEAW	147	162	3	14	17.4	1.557	1.48	0	11.119	10.575	0	3.394	3.32	3.203	24.246	23.715	22.878	6.464	6.006	0	46.171	42.902	0
PI3Kd_WT_roginolisib	AAARRQQLGWEA	150	161	2	10	10.2	1.538	1.453	0	15.382	14.535	0	3.459	3.219	3.091	34.594	32.193	30.906	6.104	5.522	5.582	61.035	55.225	55.824
PI3Kd_WT_roginolisib	AAARRQQLGWEAW	150	162	2	11	17.58	1.413	1.369	0	12.841	12.446	0	3.049	2.973	2.876	27.72	27.028	26.141	5.304	4.889	4.93	48.215	44.444	44.822
PI3Kd_WT_roginolisib	AARRQQLGWEAW	151	162	2	10	17.67	1.316	1.222	0	13.159	12.217	0	2.859	2.785	2.736	28.589	27.854	27.365	4.727	4.308	4.376	47.27	43.079	43.76
PI3Kd_WT_roginolisib	ARRQQLGWEAW	152	162	2	9	17.68	1.347	1.155	0	14.965	12.828	0	0	2.682	2.671	0	29.797	29.683	0	4.093	0	0	45.475	0
PI3Kd_WT_roginolisib	WLQYSFPLQLEPSAQTWGPGTLRLPNRALL	162	191	3	24	20.95	9.81	9.816	0	40.874	40.901	0	11.569	11.299	10.963	48.204	47.079	45.681	14.491	13.478	14.178	60.381	56.158	59.074
PI3Kd_WT_roginolisib	LQYSFPLQLEPSAQTWGPGTLRLPNRALL	163	191	3	23	20.63	10.518	10.374	0	45.729	45.105	0	12.048	11.999	11.545	52.381	52.167	50.196	14.5	14.058	14.505	63.042	61.122	63.066
PI3Kd_WT_roginolisib	QYSFPLQLEPSAQTWGPGTLRLPNRALL	164	191	3	22	20.56	10.606	10.132	0	48.211	46.052	0	11.941	12.033	11.601	54.277	54.697	52.73	14.4	14.079	0	65.452	63.997	0
PI3Kd_WT_roginolisib	PLQLEPSAQTWGPGTLRLPNRALL	168	191	3	19	19.42	10.715	10.853	0	56.393	57.121	0	12.014	12.183	11.865	63.23	64.122	62.445	13.878	13.235	13.626	73.042	69.659	71.717
PI3Kd_WT_roginolisib	QTWGPGTLRLPNRALL	176	191	3	12	17.82	7.566	7.629	0	63.048	63.575	0	8.265	8.311	8.045	68.876	69.259	67.042	9.165	9.106	9.325	76.373	75.883	77.712
PI3Kd_WT_roginolisib	WGPGTLRLPNRALL	178	191	3	10	17.91	5.353	5.423	0	53.527	54.229	0	6.338	6.268	5.924	63.379	62.679	59.236	7.449	7.02	7.209	74.488	70.195	72.09
PI3Kd_WT_roginolisib	LRLPNRALL	183	191	2	6	13.54	2.892	2.962	0	48.195	49.361	0	3.716	3.709	3.539	61.937	61.821	58.985	4.326	4.584	4.591	72.103	76.393	76.513
PI3Kd_WT_roginolisib	VNVKFEGSE	192	200	2	7	7.94	1.946	1.896	0	27.797	27.09	0	2.482	2.435	2.295	35.455	34.783	32.781	3.086	2.842	2.886	44.087	40.605	41.229
PI3Kd_WT_roginolisib	VNVKFEGSEE	192	201	2	8	8.28	2.187	2.112	0	27.337	26.399	0	2.47	2.872	2.857	30.877	35.896	35.713	3.383	3.41	3.401	42.287	42.619	42.51
PI3Kd_WT_roginolisib	VNVKFEGSEES	192	202	2	9	7.77	3.005	2.958	0	33.384	32.862	0	3.839	3.874	3.642	42.654	43.049	40.47	4.563	4.202	4.23	50.703	46.689	47.003
PI3Kd_WT_roginolisib	VNVKFEGSEESF	192	203	2	10	13.52	3.012	2.994	0	30.117	29.942	0	3.752	3.84	3.639	37.519	38.4	36.39	0	0	4.236	0	0	42.364
PI3Kd_WT_roginolisib	VNVKFEGSEESFT	192	204	2	11	12.71	3.745	3.651	0	34.043	33.195	0	4.375	4.52	4.303	39.775	41.095	39.121	5.138	4.919	4.925	46.705	44.716	44.774
PI3Kd_WT_roginolisib	ESFTFQVSTKDVPLAL	201	216	2	13	19.84	2.057	2.13	0	15.82	16.387	0	3.947	3.709	3.63	30.362	28.533	27.927	4.653	4.409	5.051	35.789	33.914	38.853
PI3Kd_WT_roginolisib	FTFQVSTKDVPLAL	203	216	2	11	19.61	1.38	1.314	0	12.544	11.944	0	3.031	2.888	2.769	27.556	26.258	25.175	3.787	3.582	3.635	34.428	32.568	33.048
PI3Kd_WT_roginolisib	TFQVSTKDVPLAL	204	216	2	10	17.14	1.145	1.199	0	11.45	11.99	0	2.917	2.805	2.811	29.171	28.05	28.107	3.671	3.477	3.534	36.707	34.773	35.339
PI3Kd_WT_roginolisib	FQVSTKDVPLAL	205	216	2	9	16.83	0.574	0.514	0	6.377	5.71	0	2.185	2.029	1.95	24.275	22.542	21.671	2.902	2.746	2.795	32.25	30.508	31.057
PI3Kd_WT_roginolisib	FQVSTKDVPLALM	205	217	2	10	18.58	0.429	0.373	0	4.289	3.733	0	2.037	2.009	1.77	20.367	20.095	17.7	2.808	2.607	2.707	28.077	26.071	27.07
PI3Kd_WT_roginolisib	QVSTKDVPLAL	206	216	2	8	14.06	0.504	0.684	0	6.303	8.549	0	2.129	2.219	2.001	26.615	27.735	25.017	2.945	2.706	2.722	36.818	33.821	34.022
PI3Kd_WT_roginolisib	VSTKDVPLAL	207	216	2	7	13.9	0.404	0.367	0	5.768	5.238	0	1.537	1.402	1.242	21.957	20.032	17.747	2.156	1.964	1.849	30.796	28.05	26.414
PI3Kd_WT_roginolisib	ACALRKKATV	218	227	2	8	1.75	1.429	1.102	0	17.859	13.78	0	3.233	3.194	3.139	40.418	39.931	39.236	3.933	4.391	3.905	49.162	54.887	48.817
PI3Kd_WT_roginolisib	CALRKKATV	219	227	2	7	0.88	1.391	1.542	0	19.867	22.035	0	3.224	3.015	3.176	46.06	43.073	45.374	3.998	3.969	3.399	57.118	56.7	48.554
PI3Kd_WT_roginolisib	CALRKKATVFRQPLVEQPED	219	238	3	16	8.43	6.71	6.258	0	41.938	39.111	0	8.259	8.241	7.955	51.621	51.504	49.722	9.15	8.897	9.039	57.185	55.607	56.496
PI3Kd_WT_roginolisib	ALRKKATVFRQPLVEQPED	220	238	3	15	8.09	6.344	6.292	0	42.293	41.944	0	8.356	8.144	7.891	55.708	54.293	52.608	9.059	8.649	8.713	60.392	57.661	58.09
PI3Kd_WT_roginolisib	LRKKATVFRQPLVEQPED	221	238	3	14	8.26	6.297	5.997	0	44.976	42.837	0	7.916	7.614	7.414	56.546	54.387	52.96	8.362	7.805	8.429	59.731	55.749	60.206
PI3Kd_WT_roginolisib	RKKATVFRQPLVEQPED	222	238	3	13	7.68	5.99	5.964	0	46.074	45.875	0	7.688	7.572	7.349	59.136	58.249	56.527	8.301	7.826	8.217	63.856	60.203	63.207
PI3Kd_WT_roginolisib	FRQPLVEQPED	228	238	2	7	9.34	3.658	3.668	0	52.262	52.402	0	4.702	4.642	4.464	67.165	66.316	63.766	5.312	4.973	5.122	75.891	71.039	73.172
PI3Kd_WT_roginolisib	YTLQVNGRHEYL	239	250	2	10	12.58	0.345	0.332	0	3.451	3.324	0	0.378	0.348	0.314	3.778	3.48	3.136	0.479	0.359	0.405	4.788	3.592	4.047
PI3Kd_WT_roginolisib	YTLQVNGRHEYLYGSY	239	254	3	14	14.1	0.925	1.002	0	6.609	7.155	0	1.128	1.081	1.909	8.057	7.724	13.638	1.651	1.519	1.582	11.794	10.848	11.301
PI3Kd_WT_roginolisib	YTLQVNGRHEYLYGSYPLCQ	239	258	3	17	16.2	1.053	0.982	0	6.192	5.775	0	1.118	1.125	1.104	6.577	6.617	6.494	1.701	1.565	1.664	10.005	9.203	9.79
PI3Kd_WT_roginolisib	YTLQVNGRHEYLYGSYPLCQF	239	259	2	18	19.94	0.932	0.933	0	5.181	5.182	0	1.037	1.065	1.018	5.759	5.917	5.655	1.496	1.438	1.789	8.313	7.991	9.936
PI3Kd_WT_roginolisib	LQVNGRHEYL	241	250	2	8	12.69	0.401	0.682	0	5.007	8.531	0	0.485	0.507	0.577	6.06	6.338	7.218	0.525	0.59	0.272	6.563	7.373	3.394
PI3Kd_WT_roginolisib	QVNGRHEYL	242	250	2	7	7.34	0	0.251	0	0	3.588	0	0.646	0.75	0.209	9.225	10.711	2.982	0	0.501	0.333	0	7.157	4.755
PI3Kd_WT_roginolisib	QVNGRHEYLYGSYPLCQF	242	259	3	15	19.07	0.844	0.749	0	5.626	4.995	0	0.915	0.871	0.87	6.102	5.808	5.798	1.416	1.288	1.298	9.44	8.584	8.65
PI3Kd_WT_roginolisib	YGSYPLCQ	251	258	1	5	13.44	0.614	0.553	0	12.283	11.059	0	0.542	0.534	0.517	10.843	10.672	10.334	0.499	0.558	0.445	9.974	11.166	8.904
PI3Kd_WT_roginolisib	YGSYPLCQF	251	259	2	6	20.27	0.32	0.377	0	5.341	6.289	0	0.32	0.38	0.246	5.334	6.334	4.094	0.29	0.255	0.084	4.825	4.25	1.405
PI3Kd_WT_roginolisib	FQYICS	259	264	1	4	13.32	0.728	0.737	0	18.212	18.433	0	0.888	0.9	0.867	22.203	22.497	21.665	0.981	0.942	0.951	24.517	23.561	23.774
PI3Kd_WT_roginolisib	FQYICSCL	259	266	1	6	20.69	0.007	0.141	0	0.117	2.351	0	0	0.126	0	0	2.103	0	0.178	0.151	0	2.964	2.509	0
PI3Kd_WT_roginolisib	QYICSCL	260	266	1	5	17.41	0.026	0.026	0	0.512	0.517	0	0.032	0.025	0.03	0.636	0.494	0.605	0.093	0.068	0.077	1.855	1.362	1.536
PI3Kd_WT_roginolisib	CLHSGLTPHL	265	274	2	7	10.56	0.934	0.92	0	13.336	13.142	0	1.194	1.113	1.066	17.063	15.899	15.232	1.524	1.962	1.977	21.768	28.029	28.237
PI3Kd_WT_roginolisib	CLHSGLTPHLTM	265	276	2	9	12.73	0.877	0.884	0	9.747	9.825	0	2.591	2.173	2.032	28.793	24.144	22.582	3.277	3.474	2.943	36.41	38.598	32.705
PI3Kd_WT_roginolisib	CLHSGLTPHLTMVHSSSIL	265	283	3	16	14.19	0.751	0.659	0	4.691	4.117	0	0.643	0.662	0.674	4.018	4.139	4.213	0.856	0.709	0.783	5.35	4.432	4.893
PI3Kd_WT_roginolisib	HSGLTPHL	267	274	2	5	8.4	0.853	0.839	0	17.065	16.788	0	1.159	1.062	1.017	23.177	21.233	20.348	1.475	1.334	1.178	29.503	26.69	23.564
PI3Kd_WT_roginolisib	HSGLTPHLTMVHSSSIL	267	283	3	14	13.26	0.625	0.607	0	4.463	4.336	0	0.681	0.684	0.598	4.866	4.886	4.272	0.91	0.75	0.879	6.5	5.36	6.276
PI3Kd_WT_roginolisib	HSGLTPHLTMVHSSSILA	267	284	3	15	12.55	0.735	0.606	0	4.902	4.037	0	0.824	0.721	0.701	5.493	4.805	4.673	1.217	0.692	0.977	8.113	4.616	6.515
PI3Kd_WT_roginolisib	TMVHSSSIL	275	283	2	7	11.22	0.032	0.018	0	0.461	0.264	0	0.09	0.086	0.018	1.283	1.231	0.253	0.394	0.185	0.221	5.627	2.64	3.162
PI3Kd_WT_roginolisib	VHSSSIL	277	283	1	5	8.93	0.137	0.151	0	2.73	3.023	0	0.201	0.256	0.126	4.029	5.114	2.514	0.469	0.378	0.405	9.371	7.553	8.098
PI3Kd_WT_roginolisib	RDEQSNPAPQVQKPRAKPPPIPAKKPSSVSL	286	316	5	21	6.6	14.131	14.105	0	67.29	67.169	0	14.486	14.342	13.953	68.98	68.297	66.444	14.553	13.688	14.341	69.3	65.182	68.29
PI3Kd_WT_roginolisib	PQVQKPRAKPPPIPAKKPSSVSL	294	316	4	15	6.83	11.434	11.388	0	76.225	75.918	0	11.794	11.827	11.669	78.63	78.849	77.794	11.954	11.222	11.328	79.692	74.811	75.523
PI3Kd_WT_roginolisib	WSLEQPFRIEL	317	327	2	8	21.01	0.716	0.881	0	8.945	11.015	0	1.199	1.145	1.173	14.99	14.309	14.66	1.831	1.775	2.08	22.882	22.186	25.995
PI3Kd_WT_roginolisib	IQGSKVNADE	328	337	2	8	2.02	0.875	0.788	0	10.932	9.85	0	2.676	2.335	2.184	33.454	29.187	27.295	3.925	3.571	3.725	49.066	44.638	46.566
PI3Kd_WT_roginolisib	FDYKDQLKTGERCL	426	439	3	12	12.94	1.902	1.899	0	15.848	15.824	0	3.241	3.589	3.303	27.011	29.906	27.527	3.798	3.695	3.906	31.646	30.788	32.552
PI3Kd_WT_roginolisib	YKDQLKTGERC	428	438	3	9	3.77	3.371	3.22	0	37.46	35.781	0	4.396	4.254	3.887	48.844	47.262	43.19	4.961	4.587	4.781	55.124	50.962	53.117
PI3Kd_WT_roginolisib	LNPTGTVRSNPNTDSAAAL	453	471	2	15	9.32	3.542	4.038	0	23.611	26.923	0	6.343	6.328	5.877	42.287	42.19	39.181	0	7.937	7.487	0	52.914	49.915
PI3Kd_WT_roginolisib	ICLPEVAPHPVYY	473	485	2	8	17.07	2.91	3.258	0	36.371	40.722	0	4.382	4.21	4.203	54.774	52.62	52.543	5.403	5.28	5.503	67.542	65.999	68.784
PI3Kd_WT_roginolisib	ICLPEVAPHPVYYPAL	473	488	2	10	18.9	2.682	2.648	0	26.823	26.478	0	3.951	3.796	3.677	39.51	37.961	36.773	5.389	4.964	4.96	53.892	49.637	49.602
PI3Kd_WT_roginolisib	PEVAPHPVYYPAL	476	488	2	8	15.6	1.147	0.97	0	14.337	12.119	0	2.105	1.976	0	26.307	24.704	0	2.258	1.889	0	28.222	23.617	0
PI3Kd_WT_roginolisib	EKILEL	489	494	1	4	14.67	0.048	0.011	0	1.19	0.272	0	0.084	0.046	-0.04	2.101	1.141	-0.992	0.777	0.177	0.502	19.43	4.43	12.556
PI3Kd_WT_roginolisib	EKILELGRHSE	489	499	3	9	7.81	0.345	0.272	0	3.837	3.02	0	0.751	0.734	0.645	8.341	8.151	7.165	1.746	1.493	1.636	19.397	16.594	18.181
PI3Kd_WT_roginolisib	EKILELGRHSEC	489	500	2	10	8.68	0.867	0.757	0	8.67	7.566	0	1.182	1.198	1.088	11.822	11.98	10.879	2.139	1.884	1.924	21.391	18.844	19.241
PI3Kd_WT_roginolisib	EKILELGRHSECVHVTE	489	505	2	15	9.61	2.784	2.57	0	18.563	17.134	0	3.12	2.979	2.986	20.799	19.857	19.906	4.503	4.016	4.237	30.019	26.77	28.247
PI3Kd_WT_roginolisib	EKILELGRHSECVHVTEE	489	506	2	16	9.66	0	2.806	0	0	17.536	0	0	3.439	3.208	0	21.496	20.051	4.757	4.242	4.441	29.729	26.511	27.755
PI3Kd_WT_roginolisib	EKILELGRHSECVHVTEEEQ	489	508	3	18	9.56	3.12	3.011	0	17.334	16.729	0	3.632	3.622	3.43	20.18	20.124	19.054	5.392	4.876	5.028	29.953	27.089	27.931
PI3Kd_WT_roginolisib	KILELGRHSEC	490	500	2	9	7.53	0.526	0.403	0	5.839	4.476	0	0.883	0.804	0.731	9.81	8.933	8.122	1.758	1.544	1.62	19.536	17.159	17.997
PI3Kd_WT_roginolisib	LGRHSECVHVTE	494	505	3	10	4.19	3.018	2.858	0	30.182	28.578	0	0	3.149	2.823	0	31.489	28.228	3.777	3.365	3.499	37.77	33.645	34.988
PI3Kd_WT_roginolisib	LGRHSECVHVTEE	494	506	3	11	4.35	3.285	3.141	0	29.859	28.553	0	3.619	3.544	3.244	32.9	32.218	29.489	4.141	3.642	3.778	37.645	33.114	34.345
PI3Kd_WT_roginolisib	LGRHSECVHVTEEEQ	494	508	3	13	4.52	3.138	3.099	0	24.14	23.838	0	3.621	3.623	3.316	27.854	27.87	25.506	4.707	4.267	4.406	36.211	32.821	33.896
PI3Kd_WT_roginolisib	GRHSECVHVTEE	495	506	3	10	3.31	3.326	3.306	0	33.255	33.064	0	3.732	3.713	3.292	37.317	37.128	32.919	4.268	4.128	4.041	42.681	41.284	40.414
PI3Kd_WT_roginolisib	CVHVTEEEQ	500	508	2	7	3.78	2.266	2.175	0	32.378	31.072	0	2.993	2.629	2.509	42.751	37.558	35.836	4.024	3.63	3.662	57.484	51.858	52.321
PI3Kd_WT_roginolisib	VHVTEE	501	506	1	4	2.22	1.988	1.941	0	49.71	48.518	0	2.389	2.157	2.158	59.716	53.937	53.94	2.895	2.635	2.516	72.376	65.875	62.889
PI3Kd_WT_roginolisib	VHVTEEEQ	501	508	1	6	2.54	1.93	1.893	0	32.174	31.553	0	2.567	2.353	2.19	42.791	39.223	36.505	3.7	3.31	3.419	61.658	55.173	56.984
PI3Kd_WT_roginolisib	VHVTEEEQLQL	501	511	2	9	13.45	1.257	1.253	0	13.964	13.926	0	1.932	1.723	1.574	21.471	19.144	17.494	4.186	3.542	3.388	46.511	39.353	37.644
PI3Kd_WT_roginolisib	REILERRGSGEL	512	523	2	10	7.32	2.875	2.814	0	28.75	28.137	0	3.231	3.277	2.934	32.312	32.775	29.344	3.43	2.998	3.1	34.301	29.976	31.002
PI3Kd_WT_roginolisib	YEHEKDLVWKLRHEVQEHFPEALARL	524	549	4	23	18.97	0.717	0.686	0	3.118	2.983	0	1.457	1.624	1.506	6.335	7.063	6.546	2.382	2.43	2.321	10.354	10.567	10.09
PI3Kd_WT_roginolisib	HEKDLVWKLRHEVQEHFPEAL	526	546	4	18	17.61	0.535	0.46	0	2.973	2.553	0	1.357	1.238	1.435	7.536	6.878	7.972	2.185	1.887	3.536	12.136	10.482	19.646
PI3Kd_WT_roginolisib	LLVTKWNKHEDVAQM	550	564	2	13	11.35	0.189	0.178	0	1.45	1.369	0	0	0.471	0.323	0	3.622	2.485	0.711	0.55	0.589	5.469	4.234	4.534
PI3Kd_WT_roginolisib	LLVTKWNKHEDVAQML	550	565	3	14	15.35	0	0	0	-0.003	-0.001	0	0.237	0.14	0.146	1.692	0.999	1.043	0.439	0.259	0.284	3.132	1.85	2.025
PI3Kd_WT_roginolisib	CSWPEL	569	574	1	3	19.09	-0.011	-0.018	0	-0.373	-0.592	0	0.713	0.43	0.381	23.774	14.338	12.692	1.181	1.099	1.388	39.378	36.638	46.275
PI3Kd_WT_roginolisib	LDFSFPDCHVGSF	583	595	2	10	20.72	0.684	0.55	0	6.84	5.504	0	1.841	1.67	1.613	18.41	16.698	16.125	3.414	3.07	3.582	34.137	30.705	35.823
PI3Kd_WT_roginolisib	FSFPDCHVGSF	585	595	2	8	19.41	0.404	0.348	0	5.055	4.345	0	0.969	0.849	0.796	12.112	10.615	9.954	2.212	1.948	2.043	27.653	24.348	25.533
PI3Kd_WT_roginolisib	AIKSLRKLTDDEL	596	608	2	11	11.26	1.011	0.855	0	9.192	7.771	0	1.475	1.228	1.396	13.41	11.16	12.694	1.869	1.488	1.973	16.995	13.523	17.936
PI3Kd_WT_roginolisib	FQYLLQ	609	614	1	4	16.86	0.013	0.032	0	0.323	0.795	0	0.018	0.014	0.025	0.449	0.359	0.63	0.029	0.049	0.043	0.718	1.224	1.085
PI3Kd_WT_roginolisib	LVQVLKYESYL	615	625	2	9	18.4	1.117	1.122	0	12.416	12.466	0	1.871	1.865	1.869	20.787	20.727	20.765	2.566	2.474	2.486	28.513	27.49	27.617
PI3Kd_WT_roginolisib	VQVLKYESY	616	624	2	7	11.98	0.966	1.031	0	13.806	14.725	0	1.665	1.752	1.634	23.783	25.034	23.344	1.783	1.697	1.897	25.469	24.237	27.097
PI3Kd_WT_roginolisib	VQVLKYESYL	616	625	2	8	16.62	1.074	1.081	0	13.422	13.516	0	1.858	1.852	1.834	23.224	23.156	22.922	2.5	2.387	0	31.254	29.841	0
PI3Kd_WT_roginolisib	VQVLKYESYLDC	616	627	2	10	16.74	0.925	0.971	0	9.247	9.711	0	1.917	1.818	1.736	19.169	18.177	17.359	3.042	3.175	2.837	30.422	31.754	28.373
PI3Kd_WT_roginolisib	ELTKFLL	628	634	2	5	18.5	-0.069	-0.072	0	-1.381	-1.439	0	0.001	0.001	-0.006	0.026	0.026	-0.113	0.014	-0.002	-0.049	0.271	-0.041	-0.977
PI3Kd_WT_roginolisib	ELTKFLLDRALANRKIGHFL	628	647	3	18	16.98	0.072	0.062	0	0.401	0.344	0	0.224	0.243	0.118	1.247	1.35	0.656	0.266	0.167	0.212	1.476	0.926	1.177
PI3Kd_WT_roginolisib	LTKFLLDRALANRKIGHF	629	646	3	16	13.71	0.109	-0.031	0	0.682	-0.191	0	0.179	0	0	1.119	0	0	0.058	0.112	0.395	0.362	0.7	2.466
PI3Kd_WT_roginolisib	TKFLLD	630	635	1	4	13.76	-0.051	0.046	0	-1.265	1.145	0	0.127	-0.006	-0.058	3.168	-0.16	-1.446	-0.002	0.04	-0.026	-0.057	1.009	-0.645
PI3Kd_WT_roginolisib	TKFLLDRALANRKIGHF	630	646	3	15	13.14	0.217	0.04	0	1.445	0.264	0	0.296	0.216	0.176	1.973	1.442	1.17	0.506	0.308	0.402	3.371	2.052	2.677
PI3Kd_WT_roginolisib	TKFLLDRALANRKIGHFL	630	647	3	16	15.42	0.275	-0.138	0	1.721	-0.864	0	0.132	-0.008	0.105	0.823	-0.052	0.657	0.126	-0.03	0.064	0.785	-0.187	0.401
PI3Kd_WT_roginolisib	LLDRALANRKIGHF	633	646	3	12	10.44	0.154	0.066	0	1.282	0.552	0	0.315	0.215	0.234	2.626	1.789	1.95	0.501	0.44	0	4.176	3.666	0
PI3Kd_WT_roginolisib	LLDRALANRKIGHFL	633	647	2	13	13.01	0.084	0.001	0	0.647	0.006	0	0.177	0.088	0.195	1.358	0.676	1.501	0.261	0.107	0.162	2.011	0.824	1.244
PI3Kd_WT_roginolisib	LLDRALANRKIGHFLFWHL	633	651	4	17	18.75	0.129	0.073	0	0.757	0.428	0	0.109	0.261	0.14	0.64	1.533	0.824	0.191	0.114	0.047	1.121	0.669	0.279
PI3Kd_WT_roginolisib	DRALANRKIGHF	635	646	3	10	7.15	0.168	0.112	0	1.682	1.116	0	0	0.216	0.205	0	2.156	2.048	0.597	0.367	0.45	5.974	3.668	4.501
PI3Kd_WT_roginolisib	RALANRKIGHF	636	646	2	9	5.67	0.086	-0.026	0	0.954	-0.284	0	0.272	0.195	0.206	3.023	2.169	2.291	0.638	0.401	0.342	7.085	4.454	3.797
PI3Kd_WT_roginolisib	LFWHLRSEM	647	655	2	7	17.01	0.108	0.232	0	1.542	3.315	0	0.022	0.064	0.038	0.316	0.911	0.537	0.048	0	0.017	0.683	0	0.246
PI3Kd_WT_roginolisib	FWHLRSEM	648	655	2	6	14.83	-0.215	-0.179	0	-3.577	-2.984	0	-0.215	0	-0.214	-3.591	0	-3.563	-0.22	0	-0.169	-3.666	0	-2.811
PI3Kd_WT_roginolisib	RSEMHVPSVA	652	661	2	7	8.26	1.07	0.976	0	15.289	13.943	0	1.047	1.066	0.934	14.955	15.235	13.34	1.334	1.134	1.153	19.053	16.199	16.466
PI3Kd_WT_roginolisib	HVPSVA	656	661	1	3	3.15	0.788	0.818	0	26.271	27.267	0	0.89	0.834	0.816	29.682	27.79	27.202	1.159	1.055	1.064	38.648	35.15	35.451
PI3Kd_WT_roginolisib	LRFGLIL	662	668	2	5	20.81	0.066	0.004	0	1.313	0.08	0	0.042	0.016	0.037	0.835	0.324	0.737	0.061	0.021	0.015	1.22	0.416	0.305
PI3Kd_WT_roginolisib	LRFGLILE	662	669	2	6	19.96	0.071	0.011	0	1.181	0.186	0	0.051	0.037	0.033	0.849	0.612	0.551	0.064	0.047	-0.055	1.07	0.776	-0.915
PI3Kd_WT_roginolisib	LRFGLILEA	662	670	2	7	20.34	0.118	0.032	0	1.68	0.453	0	-0.004	0.061	0.013	-0.062	0.867	0.186	0.056	0.03	0.018	0.802	0.422	0.26
PI3Kd_WT_roginolisib	RFGLIL	663	668	1	4	19.79	-0.009	-0.047	0	-0.233	-1.184	0	-0.011	-0.014	-0.001	-0.277	-0.356	-0.022	-0.002	-0.009	-0.015	-0.058	-0.219	-0.383
PI3Kd_WT_roginolisib	EAYCRGSTHHMKVL	669	682	3	12	6.03	0.686	0	0	5.714	0	0	0.464	0	0.366	3.865	0	3.048	0.959	0.952	0.935	7.991	7.932	7.794
PI3Kd_WT_roginolisib	YCRGSTHHMKVLM	671	683	3	11	6.5	0.146	0.341	0	1.332	3.103	0	0.422	0.486	0.078	3.837	4.421	0.712	0.925	0.827	1.026	8.409	7.516	9.331
PI3Kd_WT_roginolisib	MKQGEALSKL	683	692	2	8	9.19	0.223	0.139	0	2.782	1.733	0	0.174	0.128	0.306	2.172	1.598	3.83	0.286	0.274	0.562	3.57	3.428	7.023
PI3Kd_WT_roginolisib	KQGEALSKL	684	692	2	7	7.58	0.096	0.028	0	1.376	0.405	0	0.119	0.046	0.054	1.707	0.656	0.777	0.208	0.15	0.178	2.976	2.142	2.543
PI3Kd_WT_roginolisib	KQGEALSKLKALND	684	697	3	12	8.77	0.2	0.074	0	1.668	0.617	0	0	0.188	0.107	0	1.567	0.893	0.311	0.28	0.263	2.588	2.333	2.19
PI3Kd_WT_roginolisib	LSKLKALND	689	697	2	7	6.54	0.166	0.095	0	2.366	1.358	0	0.188	0.142	0.119	2.685	2.031	1.696	0.13	0.091	0.133	1.861	1.298	1.894
PI3Kd_WT_roginolisib	SKLKALND	690	697	2	6	3.65	0.129	0.075	0	2.142	1.252	0	0.148	0.084	0.092	2.458	1.408	1.539	0.122	0.076	0.091	2.032	1.274	1.514
PI3Kd_WT_roginolisib	SKLKALNDF	690	698	2	7	11.81	0.1	0.069	0	1.435	0.992	0	0.129	0.083	0.062	1.837	1.19	0.88	0.084	0.096	0.11	1.203	1.37	1.577
PI3Kd_WT_roginolisib	FVKLSSQKTPKPQTKE	698	713	2	12	4.11	3.095	3.16	0	25.789	26.33	0	5.353	5.072	4.831	44.61	42.265	40.254	6.163	5.647	5.964	51.358	47.058	49.702
PI3Kd_WT_roginolisib	FVKLSSQKTPKPQTKE	698	713	3	12	4.11	3.061	2.955	0	25.512	24.622	0	5.281	5.064	4.8	44.011	42.198	39.998	6.248	5.491	5.862	52.063	45.755	48.849
PI3Kd_WT_roginolisib	FVKLSSQKTPKPQTKELMHL	698	717	4	16	9.92	1.868	1.877	0	11.673	11.733	0	3.079	2.994	2.766	19.241	18.711	17.287	3.998	3.363	3.724	24.987	21.02	23.278
PI3Kd_WT_roginolisib	FVKLSSQKTPKPQTKELMHLCM	698	719	3	18	12.79	1.709	1.68	0	9.493	9.336	0	2.754	2.618	2.349	15.297	14.545	13.049	3.616	3.095	3.244	20.089	17.192	18.023
PI3Kd_WT_roginolisib	VKLSSQKTPKPQTKE	699	713	3	11	1.8	3.32	3.204	0	30.18	29.126	0	5.815	5.517	5.267	52.866	50.151	47.881	6.848	6.069	6.349	62.251	55.171	57.717
PI3Kd_WT_roginolisib	VKLSSQKTPKPQTKE	699	713	4	11	1.8	3.405	3.468	0	30.956	31.526	0	6	5.539	4.961	54.547	50.352	45.097	6.684	6.157	6.291	60.768	55.974	57.192
PI3Kd_WT_roginolisib	RQEAYL	720	725	1	4	9.21	1.422	1.399	0	35.547	34.98	0	1.595	1.555	1.474	39.886	38.886	36.862	2.484	2.275	2.31	62.101	56.871	57.749
PI3Kd_WT_roginolisib	RQEAYLEA	720	727	2	6	8.96	1.535	1.481	0	25.585	24.688	0	2.692	2.632	2.492	44.865	43.869	41.527	3.995	3.687	3.716	66.58	61.457	61.93
PI3Kd_WT_roginolisib	EALSHLQSPLDPSTL	726	740	2	11	15.63	0.306	0.256	0	2.786	2.323	0	1.141	0.977	0.993	10.374	8.882	9.025	2.569	2.458	2.633	23.359	22.347	23.934
PI3Kd_WT_roginolisib	EALSHLQSPLDPSTLL	726	741	2	12	18.61	0.261	0.219	0	2.172	1.829	0	1.118	0.932	1.352	9.315	7.764	11.266	2.577	2.463	2.44	21.472	20.521	20.337
PI3Kd_WT_roginolisib	LSHLQSPLDPSTL	728	740	2	9	14.61	0.213	0.163	0	2.361	1.81	0	1.097	0.866	0.831	12.186	9.621	9.238	2.524	2.455	2.368	28.046	27.281	26.313
PI3Kd_WT_roginolisib	LSHLQSPLDPSTLL	728	741	2	10	18.16	0.275	0.225	0	2.754	2.253	0	1.117	0.958	1.04	11.169	9.584	10.397	2.578	2.503	2.515	25.784	25.026	25.149
PI3Kd_WT_roginolisib	LAEVCVE	741	747	1	5	9.97	1.066	1.116	0	21.316	22.322	0	0	1.7	1.695	0	33.993	33.89	0	1.871	1.919	0	37.411	38.385
PI3Kd_WT_roginolisib	VCVEQCTF	744	751	1	6	15.13	1.055	0	0	17.586	0	0	2.507	2.57	2.397	41.785	42.838	39.957	3.088	2.961	2.84	51.463	49.358	47.338
PI3Kd_WT_roginolisib	MDSKMKPLW	752	760	2	6	15.04	0.969	1.087	0	16.143	18.108	0	0.99	0.943	0.882	16.497	15.708	14.704	0	1.167	1.146	0	19.455	19.105
PI3Kd_WT_roginolisib	MDSKMKPLWIM	752	762	2	8	19.31	0.838	0.81	0	10.479	10.126	0	0.925	0.851	0.78	11.557	10.641	9.752	1.151	0.993	1.011	14.387	12.411	12.643
PI3Kd_WT_roginolisib	DSKMKPLW	753	760	2	5	14.85	0.944	1.028	0	18.873	20.555	0	0.848	0.932	0.874	16.957	18.639	17.489	1.402	1.004	1.243	28.045	20.075	24.866
PI3Kd_WT_roginolisib	DSKMKPLWIM	753	762	3	7	19.37	0.756	0.713	0	10.805	10.188	0	0.781	0.749	0.916	11.159	10.7	13.079	1.017	0.804	0.937	14.528	11.481	13.39
PI3Kd_WT_roginolisib	IMYSNE	761	766	1	4	6.46	1.387	1.303	0	34.674	32.563	0	1.682	1.61	1.48	42.047	40.256	37.001	2.231	2.055	2.105	55.785	51.38	52.623
PI3Kd_WT_roginolisib	YSNEEAGSGGSVGIIFKNGDDLRQDM	763	788	3	24	16.81	4.067	3.965	0	16.946	16.522	0	5.559	5.962	5.788	23.163	24.842	24.116	7.958	6.736	7.764	33.159	28.068	32.349
PI3Kd_WT_roginolisib	EAGSGGSVGIIFKNGDDL	767	784	2	16	16.49	1.934	1.855	0	12.086	11.597	0	0	2.744	2.506	0	17.15	15.662	0	3.019	0	0	18.868	0
PI3Kd_WT_roginolisib	EAGSGGSVGIIFKNGDDLRQDM	767	788	2	20	16.38	1.653	1.925	0	8.263	9.623	0	4.157	4.165	3.838	20.787	20.824	19.189	6.198	6.075	6	30.991	30.373	30
PI3Kd_WT_roginolisib	EAGSGGSVGIIFKNGDDLRQDMLT	767	790	3	22	17.66	1.503	2.275	0	6.832	10.341	0	3.819	3.75	3.676	17.358	17.046	16.708	5.341	5.398	5.583	24.279	24.538	25.379
PI3Kd_WT_roginolisib	MDVLWKQEGLD	797	807	2	9	16.19	0.132	0.066	0	1.463	0.732	0	0	0.315	0.284	0	3.502	3.152	0	0.821	0.907	0	9.126	10.079
PI3Kd_WT_roginolisib	MDVLWKQEGLDL	797	808	2	10	19.55	0.089	0.047	0	0.891	0.467	0	0.255	0.208	0.239	2.548	2.075	2.387	0.735	0.664	0.733	7.352	6.642	7.329
PI3Kd_WT_roginolisib	DVLWKQEGLDL	798	808	2	9	18.63	0.058	0.058	0	0.648	0.648	0	0.322	0.197	0.214	3.575	2.193	2.377	0.839	0.72	0	9.317	8.005	0
PI3Kd_WT_roginolisib	VLWKQEGLDL	799	808	2	8	17.63	0.091	0.111	0	1.132	1.394	0	0.348	0.278	0.268	4.352	3.47	3.344	0.899	0.779	0.821	11.232	9.742	10.259
PI3Kd_WT_roginolisib	WKQEGLD	801	807	2	5	8.15	0.101	-0.002	0	2.02	-0.039	0	0.416	0.363	0.308	8.312	7.262	6.167	1.292	1.144	1.223	25.848	22.886	24.45
PI3Kd_WT_roginolisib	WKQEGLDL	801	808	2	6	14.9	-0.037	-0.082	0	-0.621	-1.367	0	0.252	0.15	0.117	4.206	2.499	1.943	0.823	0.686	0	13.722	11.428	0
PI3Kd_WT_roginolisib	LRMTPYGCLPTGDRTGL	808	824	3	13	15.28	0.507	0.292	0	3.901	2.244	0	0.57	0.456	0.485	4.383	3.505	3.731	0.874	0.611	0.822	6.72	4.701	6.326
PI3Kd_WT_roginolisib	LRMTPYGCLPTGDRTGLIE	808	826	3	15	16	0.552	0.397	0	3.682	2.644	0	0.571	0.683	0.591	3.808	4.552	3.938	1.049	0.739	0.884	6.995	4.928	5.897
PI3Kd_WT_roginolisib	RMTPYGCLPTGDRTGL	809	824	3	12	13.91	0.561	0	0	4.671	0	0	0.585	0.556	0.532	4.874	4.633	4.436	0	0.861	0.863	0	7.174	7.194
PI3Kd_WT_roginolisib	RMTPYGCLPTGDRTGLIE	809	826	3	14	14.7	0.619	0.439	0	4.421	3.136	0	0.598	0.575	0.479	4.271	4.105	3.423	0.872	0.775	0.843	6.232	5.534	6.024
PI3Kd_WT_roginolisib	TPYGCLPTGDRTGLIE	811	826	2	13	14.73	0.539	0.437	0	4.145	3.364	0	0.894	0.644	0.633	6.879	4.953	4.87	1.286	0.545	0	9.896	4.189	0
PI3Kd_WT_roginolisib	VVLRSDTIA	827	835	1	7	8.22	0.99	0.938	0	14.14	13.405	0	1.389	1.268	1.238	19.843	18.111	17.686	2.165	1.98	2.002	30.925	28.281	28.6
PI3Kd_WT_roginolisib	VVLRSDTIA	827	835	2	7	8.22	0.95	0.922	0	13.569	13.165	0	1.367	1.261	1.223	19.534	18.008	17.467	2.153	1.995	2.053	30.751	28.502	29.329
PI3Kd_WT_roginolisib	VVLRSDTIAN	827	836	1	8	6.94	1.018	0.955	0	12.724	11.939	0	1.48	1.333	1.312	18.504	16.668	16.396	2.283	2.155	2.145	28.535	26.939	26.81
PI3Kd_WT_roginolisib	VVLRSDTIAN	827	836	2	8	6.94	0.999	0.953	0	12.49	11.918	0	1.447	1.316	1.258	18.082	16.448	15.73	2.275	2.128	2.127	28.437	26.598	26.593
PI3Kd_WT_roginolisib	VVLRSDTIANIQL	827	839	2	11	16.8	0.915	0.907	0	8.319	8.243	0	1.621	1.515	1.43	14.734	13.776	13.003	3.187	2.935	3.009	28.971	26.685	27.359
PI3Kd_WT_roginolisib	VLRSDTIANIQL	828	839	2	10	16.35	0.188	0.054	0	1.877	0.538	0	0.711	0.373	0.345	7.114	3.734	3.446	1.562	1.521	1.719	15.617	15.21	17.187
PI3Kd_WT_roginolisib	RSDTIANIQL	830	839	2	8	15.21	0.053	0.022	0	0.66	0.28	0	0.361	0.308	0.304	4.509	3.851	3.803	1.346	1.221	1.251	16.822	15.259	15.638
PI3Kd_WT_roginolisib	IANIQL	834	839	1	4	14.45	0.082	0.042	0	2.039	1.039	0	0.263	0.284	0.259	6.572	7.094	6.476	1.272	1.289	1.176	31.811	32.219	29.401
PI3Kd_WT_roginolisib	AATAAFNKDAL	845	855	2	9	10.88	5.998	5.929	0	66.647	65.877	0	6.953	7.198	6.731	77.251	79.979	74.788	7.305	6.83	6.868	81.169	75.887	76.311
PI3Kd_WT_roginolisib	AATAAFNKDALL	845	856	2	10	14.33	5.519	5.53	0	55.193	55.305	0	6.802	6.884	6.581	68.022	68.841	65.808	6.991	6.755	6.683	69.912	67.546	66.826
PI3Kd_WT_roginolisib	AATAAFNKDALLNWLKSKNPGEAL	845	868	4	21	19.18	7.005	6.864	0	33.357	32.687	0	9.546	9.716	9.442	45.458	46.268	44.963	11.095	10.647	11.68	52.833	50.7	55.621
PI3Kd_WT_roginolisib	FNKDALL	850	856	2	5	12.91	1.578	1.784	0	31.56	35.677	0	2.694	2.691	2.577	53.877	53.822	51.535	2.815	2.576	2.541	56.291	51.528	50.824
PI3Kd_WT_roginolisib	FNKDALLNWLKSKNPGEAL	850	868	3	16	18.94	3.973	3.926	0	24.832	24.54	0	6.759	6.704	6.656	42.245	41.903	41.599	8.132	7.928	7.91	50.824	49.552	49.436
PI3Kd_WT_roginolisib	FNKDALLNWLKSKNPGEALDRAIEE	850	874	4	22	19.72	4.096	4.286	0	18.619	19.484	0	7.961	7.838	7.869	36.185	35.625	35.768	9.351	9.249	8.809	42.507	42.041	40.042
PI3Kd_WT_roginolisib	NKDALL	851	856	1	4	9.27	0.869	0.832	0	21.737	20.805	0	1.929	1.854	1.749	48.22	46.338	43.733	2.065	1.915	1.924	51.628	47.872	48.112
PI3Kd_WT_roginolisib	NKDALLNWLKSKNPGEAL	851	868	3	15	17.73	3.189	3.066	0	21.263	20.44	0	5.656	5.628	5.445	37.703	37.523	36.301	7.064	6.781	6.746	47.095	45.205	44.97
PI3Kd_WT_roginolisib	NKDALLNWLKSKNPGEALDRAIEE	851	874	4	21	18.6	3.388	3.354	0	16.132	15.97	0	5.853	6.571	6.58	27.869	31.292	31.334	0	8.398	0	0	39.989	0
PI3Kd_WT_roginolisib	LNWLKSKNPGEAL	856	868	3	10	14.14	2.395	2.423	0	23.95	24.235	0	3.731	3.782	3.568	37.312	37.824	35.685	4.271	4.078	3.991	42.706	40.778	39.907
PI3Kd_WT_roginolisib	LNWLKSKNPGEALDRAIEE	856	874	3	16	15.5	2.633	2.811	0	16.453	17.57	0	4.671	4.513	4.859	29.193	28.208	30.367	5.418	4.839	5.444	33.862	30.245	34.028
PI3Kd_WT_roginolisib	NWLKSKNPGEAL	857	868	2	9	12.34	2.291	2.353	0	25.461	26.14	0	3.729	3.743	3.565	41.434	41.587	39.609	4.158	3.928	0	46.198	43.64	0
PI3Kd_WT_roginolisib	NWLKSKNPGEALDRA	857	871	3	12	10.8	2.91	2.854	0	24.246	23.785	0	4.845	4.703	4.716	40.375	39.189	39.296	5.569	5.215	5.423	46.41	43.456	45.188
PI3Kd_WT_roginolisib	NWLKSKNPGEALDRAIEE	857	874	3	15	14.28	1.867	2.653	0	12.443	17.684	0	4.533	4.616	4.307	30.222	30.776	28.713	5.569	5.301	5.339	37.124	35.337	35.593
PI3Kd_WT_roginolisib	DRAIEE	869	874	1	4	2.61	-0.002	-0.017	0	-0.039	-0.436	0	0.108	0.004	-0.031	2.69	0.1	-0.763	0.097	0.021	-0.026	2.415	0.526	-0.662
PI3Kd_WT_roginolisib	DRAIEEF	869	875	2	5	11.84	0.032	0.003	0	0.64	0.056	0	0.046	0.001	-0.012	0.917	0.026	-0.25	0.019	-0.003	0.019	0.382	-0.063	0.383
PI3Kd_WT_roginolisib	FTLSCAG	875	881	1	5	13.22	0.03	0.009	0	0.599	0.185	0	0.033	0.016	0.033	0.668	0.318	0.659	0.02	0.012	0.027	0.403	0.245	0.538
PI3Kd_WT_roginolisib	FTLSCAGY	875	882	1	6	17.1	-0.012	-0.042	0	-0.196	-0.702	0	0.049	-0.015	-0.032	0.813	-0.249	-0.538	0.08	-0.012	-0.043	1.326	-0.192	-0.724
PI3Kd_WT_roginolisib	TLSCAG	876	881	1	4	4.44	0.223	0.11	0	5.58	2.76	0	0.026	0.122	0.103	0.648	3.062	2.564	0.016	0.152	0.015	0.4	3.794	0.372
PI3Kd_WT_roginolisib	TYVLGIGDRHSDN	886	898	2	11	10.73	0.558	0.377	0	5.071	3.43	0	0.844	0.815	0.846	7.673	7.406	7.692	1.465	1.238	1.562	13.316	11.251	14.201
PI3Kd_WT_roginolisib	YVLGIGDRHSDN	887	898	3	10	9.91	0.419	0.353	0	4.191	3.527	0	0.798	0.941	0.661	7.981	9.408	6.606	1.233	1.11	1.144	12.332	11.098	11.443
PI3Kd_WT_roginolisib	YVLGIGDRHSDNIM	887	900	3	12	14.35	0.202	0.132	0	1.683	1.099	0	0.542	0.463	0.295	4.517	3.86	2.458	0.883	0.698	1.119	7.357	5.813	9.326
PI3Kd_WT_roginolisib	IRESGQL	901	907	2	5	5.43	0.151	0.1	0	3.013	1.997	0	0.454	0.349	0.329	9.075	6.987	6.578	1.109	0.934	0.985	22.19	18.679	19.692
PI3Kd_WT_roginolisib	IRESGQLFHIDF	901	912	3	10	19.1	0	0.092	0	0	0.924	0	0.222	0.123	0.14	2.225	1.232	1.397	0	0.229	0.202	0	2.287	2.023
PI3Kd_WT_roginolisib	IRESGQLFHIDFGHF	901	915	3	13	19.25	0.316	0.288	0	2.43	2.217	0	1.046	0.98	0.907	8.044	7.539	6.974	1.348	1.145	0	10.372	8.806	0
PI3Kd_WT_roginolisib	IRESGQLFHIDFGHFLGNF	901	919	4	17	20.78	1.687	1.58	0	9.924	9.297	0	3.266	3.378	3.209	19.21	19.87	18.878	4.258	4.068	4.171	25.047	23.927	24.538
PI3Kd_WT_roginolisib	FHIDFGHF	908	915	1	6	18.5	0.236	0.027	0	3.926	0.449	0	1.002	1.039	0.935	16.703	17.319	15.579	1.282	1.147	1.15	21.372	19.123	19.171
PI3Kd_WT_roginolisib	FHIDFGHFLGNF	908	919	3	10	20.9	1.46	1.37	0	14.598	13.702	0	3.217	3.123	2.971	32.168	31.234	29.712	4.031	3.879	3.904	40.311	38.794	39.045
PI3Kd_WT_roginolisib	HIDFGHF	909	915	2	5	14.46	0.224	0.236	0	4.485	4.715	0	1.177	1.033	0.91	23.542	20.65	18.194	1.45	1.276	1.631	29.003	25.515	32.611
PI3Kd_WT_roginolisib	HIDFGHFLGNF	909	919	2	9	20.35	1.478	1.389	0	16.417	15.428	0	3.21	3.217	3.088	35.665	35.74	34.306	4.031	3.96	3.882	44.791	44.002	43.138
PI3Kd_WT_roginolisib	LGNFKTKFGINRERVPFIL	916	934	4	16	16.87	3.252	3.463	0	20.327	21.642	0	4.215	4.117	3.72	26.341	25.734	23.249	5.037	4.423	4.489	31.479	27.641	28.054
PI3Kd_WT_roginolisib	RERVPFIL	927	934	2	5	16.95	0.455	0.444	0	9.101	8.883	0	1.145	1.051	0.993	22.901	21.029	19.86	1.839	1.73	1.692	36.78	34.6	33.839
PI3Kd_WT_roginolisib	YDFVHVIQQGKTNNSEKF	936	953	3	16	13.94	4.048	0	0	25.298	0	0	4.448	5.022	4.66	27.801	31.386	29.124	5.351	5.296	5.096	33.447	33.099	31.852
PI3Kd_WT_roginolisib	YDFVHVIQQGKTNNSEKFERFRG	936	958	3	21	12.98	2.885	2.85	0	13.738	13.571	0	4.151	3.961	3.764	19.766	18.863	17.925	5.244	5.039	4.947	24.969	23.994	23.559
PI3Kd_WT_roginolisib	FVHVIQQGKTNNSEKFERF	938	956	4	17	10.35	2.167	1.899	0	12.744	11.173	0	3.232	2.873	2.795	19.014	16.898	16.439	4.18	3.647	4.211	24.588	21.452	24.773
PI3Kd_WT_roginolisib	FVHVIQQGKTNNSEKFERFRG	938	958	4	19	8.53	1.928	1.816	0	10.145	9.557	0	2.932	2.787	2.526	15.43	14.667	13.294	3.934	3.364	3.609	20.704	17.704	18.993
PI3Kd_WT_roginolisib	VHVIQQGKTNNSEKFERFRG	939	958	3	18	6.86	2.146	2.015	0	11.922	11.197	0	3.323	3.088	2.753	18.461	17.157	15.292	4.408	3.654	4.112	24.488	20.301	22.844
PI3Kd_WT_roginolisib	HVIQQGKTNNSEKFERFRG	940	958	4	17	6.09	3.252	1.827	0	19.13	10.746	0	3.545	3.106	3.055	20.855	18.27	17.97	4.623	4.142	4.19	27.191	24.363	24.647
PI3Kd_WT_roginolisib	RGYCERA	957	963	2	5	2.45	0.146	0.172	0	2.93	3.434	0	0.121	0.141	0.255	2.42	2.815	5.097	0.093	0.088	0.159	1.855	1.757	3.185
PI3Kd_WT_roginolisib	RAYTIL	962	967	1	4	13.16	0.012	0.046	0	0.305	1.15	0	-0.036	0.023	0.032	-0.902	0.585	0.797	-0.002	0.013	-0.03	-0.056	0.336	-0.742
PI3Kd_WT_roginolisib	YTILRRHGLLF	964	974	2	9	15.8	0.406	0.391	0	4.514	4.34	0	0.756	0.711	0.65	8.401	7.9	7.227	1.129	0.949	0.989	12.546	10.549	10.988
PI3Kd_WT_roginolisib	ILRRHGLL	966	973	2	6	7.22	0.408	0.34	0	6.804	5.664	0	0.728	0.516	0.686	12.13	8.6	11.429	1.231	0.932	0.955	20.508	15.534	15.911
PI3Kd_WT_roginolisib	ILRRHGLLF	966	974	2	7	13.57	0.399	0.359	0	5.704	5.134	0	0.484	0.553	0.569	6.911	7.893	8.132	0.886	0.86	0.769	12.655	12.283	10.98
PI3Kd_WT_roginolisib	FALMRAAGL	978	986	2	7	17.04	0.662	0.559	0	9.458	7.983	0	2.373	2.133	2.111	33.898	30.477	30.156	4.169	3.881	4.048	59.555	55.438	57.821
PI3Kd_WT_roginolisib	FALMRAAGLPEL	978	989	2	9	19.8	0.9	0.694	0	10.004	7.709	0	3.062	2.864	2.783	34.025	31.827	30.921	5.402	5.215	5.272	60.027	57.943	58.574
PI3Kd_WT_roginolisib	RAAGLPEL	982	989	2	5	13.32	0.62	0.475	0	12.399	9.51	0	2.178	1.948	1.88	43.558	38.957	37.596	3.901	3.713	3.703	78.016	74.261	74.068
PI3Kd_WT_roginolisib	RAAGLPELSC	982	991	2	7	13.04	1.832	1.813	0	26.173	25.898	0	3.759	3.679	3.503	53.7	52.554	50.04	5.778	5.331	5.398	82.541	76.162	77.116
PI3Kd_WT_roginolisib	PELSCSKDIQY	987	997	2	9	12.18	2.262	2.41	0	25.136	26.777	0	4.75	4.508	4.437	52.775	50.094	49.305	5.424	5.097	4.66	60.269	56.633	51.773
PI3Kd_WT_roginolisib	PELSCSKDIQYLKD	987	1000	3	12	12.53	1.924	1.957	0	16.035	16.304	0	4.434	4.118	3.98	36.953	34.32	33.165	5.533	5.122	5.115	46.109	42.685	42.626
PI3Kd_WT_roginolisib	SCSKDIQY	990	997	2	6	7.04	1.67	1.535	0	27.827	25.589	0	3.809	3.594	3.418	63.477	59.903	56.971	3.962	3.829	3.862	66.036	63.823	64.372
PI3Kd_WT_roginolisib	SCSKDIQYLKD	990	1000	3	9	8.41	1.451	1.264	0	16.122	14.043	0	3.483	3.398	3.143	38.699	37.751	34.922	4.719	4.38	4.408	52.439	48.667	48.974
PI3Kd_WT_roginolisib	SCSKDIQYLKDSL	990	1002	3	11	15.43	1.21	1.018	0	11.001	9.258	0	3.552	3.288	3.362	32.289	29.891	30.563	4.787	4.568	4.985	43.515	41.528	45.321
PI3Kd_WT_roginolisib	SKDIQYLKDSL	992	1002	2	9	12.78	0.852	0.787	0	9.469	8.74	0	2.62	2.359	2.401	29.11	26.21	26.675	3.794	3.48	3.63	42.155	38.664	40.33
PI3Kd_WT_roginolisib	IQYLKDSL	995	1002	2	6	13.15	0.461	0.397	0	7.684	6.612	0	0.931	0.86	0.835	15.512	14.334	13.924	1.543	1.391	1.371	25.722	23.185	22.849
PI3Kd_WT_roginolisib	LKDSLALGKTEEEALKHFRVKF	998	1019	5	20	16.51	2.608	2.696	0	13.04	13.478	0	4.094	3.785	3.336	20.472	18.927	16.681	0	5.137	5.112	0	25.683	25.56
PI3Kd_WT_roginolisib	SLALGKTEE	1001	1009	2	7	7.18	2.805	2.684	0	40.076	38.344	0	3.593	3.444	3.325	51.322	49.196	47.502	4.411	4.176	4.157	63.013	59.659	59.387
PI3Kd_WT_roginolisib	SLALGKTEEE	1001	1010	2	8	7.45	2.765	2.589	0	34.563	32.366	0	3.759	3.53	3.513	46.988	44.125	43.912	4.851	4.305	4.498	60.637	53.818	56.229
PI3Kd_WT_roginolisib	SLALGKTEEEALKHFRVKF	1001	1019	4	17	16.61	2.341	2.234	0	13.77	13.144	0	3.163	3.112	3.068	18.608	18.309	18.044	4.628	4.328	4.457	27.221	25.458	26.218
PI3Kd_WT_roginolisib	SLALGKTEEEALKHFRVKFNE	1001	1021	4	19	16.01	2.362	2.253	0	12.433	11.857	0	3.208	3.211	3.191	16.886	16.9	16.795	4.699	4.452	4.702	24.731	23.43	24.745
PI3Kd_WT_roginolisib	SLALGKTEEEALKHFRVKFNEA	1001	1022	3	20	16.1	2.397	2.242	0	11.985	11.211	0	4.414	3.107	2.925	22.071	15.537	14.624	4.865	5.723	4.505	24.324	28.616	22.527
PI3Kd_WT_roginolisib	SLALGKTEEEALKHFRVKFNEAL	1001	1023	4	21	17.9	2.298	2.202	0	10.944	10.486	0	3.133	2.944	3.157	14.919	14.02	15.032	4.711	4.09	5.682	22.433	19.479	27.058
PI3Kd_WT_roginolisib	ALGKTEEEALKHFRVKF	1003	1019	4	15	14.69	1.727	1.828	0	11.516	12.19	0	2.823	2.581	2.319	18.822	17.206	15.463	3.407	3.388	3.687	22.712	22.589	24.581
PI3Kd_WT_roginolisib	ALGKTEEEALKHFRVKFNE	1003	1021	4	17	14.42	1.92	1.616	0	11.294	9.503	0	2.68	2.424	2.311	15.766	14.258	13.592	3.999	3.598	3.769	23.525	21.166	22.173
PI3Kd_WT_roginolisib	ALGKTEEEALKHFRVKFNEA	1003	1022	4	18	14.16	1.947	1.599	0	10.819	8.882	0	2.817	2.68	2.208	15.648	14.89	12.267	3.894	0	3.685	21.636	0	20.473
PI3Kd_WT_roginolisib	ALGKTEEEALKHFRVKFNEAL	1003	1023	3	19	16.31	1.742	1.727	0	9.167	9.087	0	2.531	2.347	2.316	13.321	12.355	12.191	3.691	3.409	3.748	19.428	17.943	19.726
PI3Kd_WT_roginolisib	EALKHFRVKF	1010	1019	3	8	10.54	-0.004	-0.002	0	-0.048	-0.029	0	0.059	0.02	0.002	0.733	0.256	0.021	0.221	0.127	0.183	2.757	1.591	2.284
PI3Kd_WT_roginolisib	EALKHFRVKFNE	1010	1021	3	10	9.46	0.033	0.015	0	0.33	0.152	0	0.089	0.063	0.028	0.889	0.63	0.278	0.287	0.168	0.228	2.865	1.676	2.277
PI3Kd_WT_roginolisib	EALKHFRVKFNEA	1010	1022	2	11	9.53	1.027	0	0	9.337	0	0	2.474	2.304	2.135	22.492	20.945	19.408	3.344	2.853	3.001	30.397	25.936	27.282
PI3Kd_WT_roginolisib	EALKHFRVKFNEAL	1010	1023	3	12	12.38	0.036	0.025	0	0.3	0.207	0	0.101	0.06	0.003	0.845	0.498	0.023	0.249	0.198	0.203	2.074	1.646	1.688
PI3Kd_WT_roginolisib	ALKHFRVKFNE	1011	1021	3	9	8.82	-0.015	0.06	0	-0.168	0.669	0	0.032	0.017	0.017	0.357	0.192	0.188	-0.061	0.08	0.158	-0.678	0.891	1.753
PI3Kd_WT_roginolisib	ALKHFRVKFNEAL	1011	1023	3	11	11.52	0.034	0.073	0	0.305	0.668	0	0.1	0.007	0.058	0.909	0.067	0.528	0.072	0.045	0.072	0.653	0.408	0.651
PI3Kd_WT_roginolisib	ALRESWKTKVNWLAHNVSKDNRQ	1022	1044	5	21	12	7.84	7.495	0	37.335	35.693	0	11.575	11.321	11.115	55.12	53.908	52.93	12.253	11.962	12.247	58.348	56.963	58.317
PI3Kd_WT_roginolisib	LRESWKTKVNW	1023	1033	3	9	12.25	1.789	1.759	0	19.876	19.55	0	4.443	4.247	3.994	49.365	47.186	44.382	4.798	4.397	4.345	53.31	48.86	48.276
PI3Kd_WT_roginolisib	LRESWKTKVNWLAHNVSKDNRQ	1023	1044	5	20	11.48	7.042	7.09	0	35.212	35.451	0	10.486	10.81	10.086	52.428	54.052	50.43	11.185	11.011	11.271	55.924	55.053	56.354
PI3Kd_WT_roginolisib	RESWKTKVNW	1024	1033	3	8	11.85	1.587	1.545	0	19.838	19.308	0	4.3	4.116	3.906	53.754	51.444	48.823	4.64	4.351	4.384	58.005	54.391	54.8
PI3Kd_WT_roginolisib	RESWKTKVNWLAHNVSKDNRQ	1024	1044	4	19	10.98	7.359	7.223	0	38.733	38.015	0	11.085	10.896	10.573	58.342	57.347	55.646	11.69	11.501	11.63	61.528	60.529	61.21
PI3Kd_WT_roginolisib	RESWKTKVNWLAHNVSKDNRQ	1024	1044	5	19	10.98	7.522	7.324	0	39.592	38.547	0	11.16	11.218	10.517	58.734	59.04	55.355	11.687	0	11.638	61.508	0	61.255
PI3Kd_WT_roginolisib	SWKTKVNWLAHNVSKDNRQ	1026	1044	4	17	11.8	7.104	6.847	0	41.786	40.276	0	10.322	10.427	10.341	60.718	61.334	60.829	10.974	10.483	10.559	64.551	61.666	62.111
PI3Kd_WT_roginolisib	SWKTKVNWLAHNVSKDNRQ	1026	1044	5	17	11.8	7.314	7.267	0	43.025	42.745	0	10.422	10.632	10.283	61.304	62.538	60.487	11.156	10.856	11.286	65.622	63.857	66.388
PI3Kd_WT_roginolisib	KTKVNWLAHNVSKDNRQ	1028	1044	4	15	6	4.887	4.801	0	32.581	32.008	0	7.017	6.956	6.624	46.782	46.373	44.161	7.492	7.023	7.026	49.945	46.817	46.838
PI3Kd_Y685A_roginolisib	FWTKEENQS	11	19	2	7	7.92	4.593	4.529	4.282	65.607	64.699	61.167	4.923	4.596	4.039	70.322	65.653	57.702	4.839	4.412	4.766	69.128	63.032	68.087
PI3Kd_Y685A_roginolisib	WTKEENQS	12	19	2	6	1.85	4.169	3.85	4.292	69.487	64.16	71.527	4.57	4.194	4.058	76.164	69.901	67.63	4.478	4.196	4.256	74.634	69.937	70.936
PI3Kd_Y685A_roginolisib	WTKEENQSV	12	20	1	7	5.85	0	4.159	3.946	0	59.416	56.37	4.588	4.321	3.973	65.538	61.73	56.764	4.879	4.781	4.909	69.699	68.305	70.127
PI3Kd_Y685A_roginolisib	WTKEENQSVV	12	21	2	8	8.05	3.673	3.828	3.415	45.912	47.853	42.691	4.823	3.976	3.85	60.292	49.698	48.125	5.177	5.106	5.202	64.715	63.83	65.022
PI3Kd_Y685A_roginolisib	WTKEENQSVVVD	12	23	2	10	8.33	3.958	3.858	3.596	39.582	38.584	35.957	4.772	4.6	4.053	47.718	45.997	40.53	5.451	5.412	5.528	54.506	54.118	55.28
PI3Kd_Y685A_roginolisib	VVDFLLPTGVY	21	31	1	8	21.11	0.045	0	0	0.558	0	0	0.268	0.523	0.214	3.344	6.539	2.681	0	0.951	1.029	0	11.882	12.867
PI3Kd_Y685A_roginolisib	FLLPTGV	24	30	1	4	18.18	0.108	0.055	0.477	2.69	1.381	11.931	0.464	0.479	0.426	11.608	11.978	10.653	1.027	1.09	1.107	25.663	27.257	27.664
PI3Kd_Y685A_roginolisib	FLLPTGVY	24	31	1	5	19.59	0.086	0.056	0.178	1.724	1.114	3.57	0.51	0.435	0.446	10.207	8.706	8.918	1.201	1.087	1.057	24.022	21.738	21.13
PI3Kd_Y685A_roginolisib	YLNFPVSRNANL	31	42	2	9	15.63	2.088	1.884	1.896	23.203	20.935	21.062	3.058	3.028	2.77	33.977	33.64	30.78	3.312	3.213	3.325	36.802	35.701	36.942
PI3Kd_Y685A_roginolisib	LNFPVSRNANL	32	42	2	8	13.59	1.495	1.266	1.373	18.686	15.825	17.164	2.525	2.458	2.099	31.562	30.73	26.233	2.747	2.62	2.638	34.334	32.755	32.971
PI3Kd_Y685A_roginolisib	LNFPVSRNANLST	32	44	2	10	12.39	1.351	1.188	1.279	13.51	11.878	12.794	2.594	2.556	2.313	25.941	25.555	23.129	3.739	3.546	3.773	37.387	35.464	37.734
PI3Kd_Y685A_roginolisib	PVSRNANL	35	42	2	6	4.51	1.716	1.534	1.589	28.598	25.569	26.486	3.158	2.857	2.7	52.637	47.62	44.998	3.228	3.078	3.201	53.796	51.294	53.358
PI3Kd_Y685A_roginolisib	STIKQLL	43	49	2	5	13.27	0.044	-0.011	0	0.879	-0.22	0	0.044	0.034	0.029	0.875	0.685	0.573	-0.008	0.037	0.008	-0.155	0.735	0.167
PI3Kd_Y685A_roginolisib	STIKQLLWHRAQYEPLF	43	59	3	14	18.36	0.654	0.545	0.601	4.675	3.893	4.295	1.421	1.396	1.347	10.152	9.971	9.622	2.717	2.785	2.739	19.41	19.892	19.566
PI3Kd_Y685A_roginolisib	STIKQLLWHRAQYEPLFHMLSGPEA	43	67	3	21	19.44	2.778	2.593	2.805	13.23	12.348	13.356	5.093	4.959	4.763	24.254	23.614	22.681	6.994	6.709	6.913	33.304	31.947	32.917
PI3Kd_Y685A_roginolisib	LLWHRAQYEPLF	48	59	2	9	18.7	0.687	0.66	0	7.632	7.333	0	1.176	1.393	1.467	13.071	15.476	16.305	2.261	2.341	2.781	25.128	26.01	30.902
PI3Kd_Y685A_roginolisib	HMLSGPEA	60	67	2	5	6.4	1.531	1.39	1.704	30.614	27.791	34.076	2.529	2.338	2.107	50.579	46.762	42.143	2.948	2.87	3.012	58.966	57.396	60.231
PI3Kd_Y685A_roginolisib	TCINQTAEQQEL	71	82	2	10	10.21	1.277	1.224	1.076	12.771	12.239	10.762	2.626	2.625	2.51	26.259	26.25	25.1	3.314	3.471	3.516	33.136	34.708	35.156
PI3Kd_Y685A_roginolisib	TCINQTAEQQELEDEQRRLCDVQPFL	71	96	3	23	20.05	4.119	3.857	4.276	17.911	16.768	18.593	8.022	7.824	7.867	34.876	34.019	34.203	10.555	10.517	10.425	45.89	45.726	45.325
PI3Kd_Y685A_roginolisib	EDEQRRLCDVQPFL	83	96	2	11	17.2	0.674	0.72	1.056	6.125	6.544	9.597	2.274	2.143	2.094	20.674	19.483	19.039	3.697	3.617	3.519	33.613	32.886	31.987
PI3Kd_Y685A_roginolisib	EQRRLCDVQPFL	85	96	2	9	16.52	0.573	0.504	0.464	6.366	5.602	5.154	1.622	1.433	1.628	18.028	15.922	18.088	2.618	2.706	2.629	29.088	30.061	29.21
PI3Kd_Y685A_roginolisib	QRRLCDVQPFLPVLRLV	86	102	3	13	9.83	0.36	0.264	0.199	2.769	2.029	1.534	1.241	1.129	0.889	9.547	8.686	6.835	2.174	1.965	2.227	16.72	15.115	17.133
PI3Kd_Y685A_roginolisib	RRLCDVQPFLPVLRL	87	101	3	11	20.63	0.025	0.429	0.698	0.23	3.897	6.349	1.073	0.784	2.125	9.751	7.127	19.322	0	3.227	1.767	0	29.336	16.065
PI3Kd_Y685A_roginolisib	VQPFLPVLRL	92	101	2	6	20.96	0.057	0.032	0.148	0.953	0.538	2.472	0.144	0.095	0.244	2.402	1.58	4.067	0.729	0.858	0.831	12.147	14.296	13.85
PI3Kd_Y685A_roginolisib	RLVAREGDRVKKLINSQISLL	100	120	3	19	15.26	7.544	8.051	7.494	39.707	42.372	39.441	8.264	8.563	8.15	43.495	45.066	42.896	9.276	10.19	8.761	48.821	53.631	46.112
PI3Kd_Y685A_roginolisib	VAREGDRVKKLINS	102	115	2	12	6.04	7.109	6.71	6.815	59.243	55.918	56.788	7.069	7.114	6.92	58.912	59.28	57.67	0	7.574	7.647	0	63.114	63.724
PI3Kd_Y685A_roginolisib	VAREGDRVKKLINSQ	102	116	2	13	6.59	7.492	6.594	0	57.634	50.722	0	7.554	7.572	7.738	58.109	58.248	59.522	8.654	7.728	8.377	66.568	59.445	64.439
PI3Kd_Y685A_roginolisib	VAREGDRVKKLINSQISL	102	119	3	16	12.72	6.145	6.392	6.576	38.407	39.949	41.1	7.657	7.029	7.459	47.854	43.931	46.617	8.482	7.964	7.718	53.013	49.774	48.239
PI3Kd_Y685A_roginolisib	VAREGDRVKKLINSQISLL	102	120	2	17	15.69	6.804	6.167	6.678	40.021	36.275	39.282	7.454	6.874	6.755	43.847	40.433	39.735	8.378	7.869	7.872	49.28	46.286	46.303
PI3Kd_Y685A_roginolisib	LIGKGLHE	120	127	2	6	5.27	0.703	0.634	0.529	11.709	10.568	8.818	1.304	1.121	0.915	21.739	18.682	15.257	0	2.396	2.329	0	39.929	38.809
PI3Kd_Y685A_roginolisib	LIGKGLHEFDSL	120	131	2	10	15.17	0.928	0.768	0.779	9.281	7.681	7.788	2.334	2.414	2.172	23.338	24.139	21.722	3.134	3.023	3.22	31.343	30.227	32.196
PI3Kd_Y685A_roginolisib	LIGKGLHEFDSLCDPEVND	120	138	3	16	17	2.121	1.813	1.796	13.259	11.33	11.223	3.864	3.809	3.275	24.151	23.805	20.469	0	5.154	5.142	0	32.211	32.14
PI3Kd_Y685A_roginolisib	LIGKGLHEFDSLCDPEVNDF	120	139	3	17	19.29	2.047	1.861	1.94	12.043	10.949	11.411	3.436	3.478	3.054	20.211	20.457	17.967	4.794	4.82	4.664	28.197	28.356	27.437
PI3Kd_Y685A_roginolisib	IGKGLHE	121	127	1	5	2.42	0.73	0.519	0.34	14.594	10.378	6.799	1.407	1.113	0.83	28.149	22.269	16.603	2.695	2.373	2.576	53.904	47.469	51.512
PI3Kd_Y685A_roginolisib	IGKGLHEF	121	128	2	6	9.35	0.204	0.142	0.133	3.394	2.368	2.211	0.878	0.714	0.708	14.629	11.904	11.793	1.37	1.214	1.415	22.826	20.228	23.587
PI3Kd_Y685A_roginolisib	IGKGLHEFDSL	121	131	2	9	13.9	0.816	0.708	0.748	9.068	7.871	8.312	2.293	2.246	2.06	25.476	24.958	22.887	0	2.704	2.859	0	30.05	31.77
PI3Kd_Y685A_roginolisib	IGKGLHEFDSLCDPEVND	121	138	3	15	16.05	1.939	1.864	1.483	12.929	12.427	9.885	3.478	3.539	2.981	23.188	23.592	19.873	4.716	4.67	4.84	31.442	31.135	32.269
PI3Kd_Y685A_roginolisib	GKGLHE	122	127	1	4	2.43	0.565	0.358	0.223	14.116	8.949	5.579	1.091	0.828	0.532	27.263	20.693	13.312	2.025	1.954	2.048	50.632	48.853	51.2
PI3Kd_Y685A_roginolisib	FDSLCDPEVNDF	128	139	1	9	18.84	0.848	0.771	0.696	9.423	8.567	7.732	1.677	1.517	1.415	18.636	16.859	15.723	2.298	2.308	2.331	25.537	25.643	25.897
PI3Kd_Y685A_roginolisib	CDPEVND	132	138	1	4	3.32	0.15	0.084	0.06	3.739	2.099	1.49	0.259	0.259	0.254	6.465	6.476	6.348	1.244	1.297	1.285	31.094	32.419	32.125
PI3Kd_Y685A_roginolisib	CDPEVNDF	132	139	1	5	12.52	0.152	0.106	0.116	3.042	2.122	2.318	0.344	0.241	0.223	6.873	4.821	4.455	1.009	1.133	1.049	20.181	22.668	20.975
PI3Kd_Y685A_roginolisib	PEVNDF	134	139	1	4	11.67	0.101	0.095	-0.005	2.517	2.365	-0.117	0.125	-0.059	0.101	3.119	-1.481	2.513	0.392	0.542	0.485	9.791	13.561	12.127
PI3Kd_Y685A_roginolisib	FRAKMCQF	139	146	2	6	12.21	0.104	0.041	0.055	1.725	0.678	0.924	0	0.573	0.569	0	9.551	9.476	0	1.651	1.581	0	27.521	26.348
PI3Kd_Y685A_roginolisib	FCEEAAARRQQLGWEAW	146	162	3	15	18.19	1.732	1.557	1.69	11.544	10.382	11.264	3.555	3.505	3.324	23.702	23.365	22.158	6.748	7.059	6.928	44.986	47.057	46.19
PI3Kd_Y685A_roginolisib	CEEAAARRQQLGWEAW	147	162	3	14	17.4	1.664	1.483	1.519	11.884	10.594	10.852	3.413	3.342	3.062	24.378	23.872	21.872	6.343	6.567	6.476	45.304	46.91	46.258
PI3Kd_Y685A_roginolisib	AAARRQQLGWEA	150	161	2	10	10.2	1.653	1.492	0	16.526	14.923	0	3.473	3.308	3.191	34.733	33.076	31.906	5.764	5.976	5.977	57.643	59.755	59.772
PI3Kd_Y685A_roginolisib	AAARRQQLGWEAW	150	162	2	11	17.58	1.508	1.394	0.349	13.705	12.676	3.176	3.095	3.009	2.762	28.137	27.353	25.108	5.167	5.227	5.319	46.975	47.517	48.355
PI3Kd_Y685A_roginolisib	AARRQQLGWEAW	151	162	2	10	17.67	1.483	1.389	1.607	14.826	13.892	16.069	2.888	2.756	2.463	28.876	27.561	24.634	4.71	4.726	4.754	47.098	47.265	47.539
PI3Kd_Y685A_roginolisib	ARRQQLGWEAW	152	162	2	9	17.68	1.339	1.334	0	14.875	14.821	0	0	2.771	2.48	0	30.792	27.558	4.255	4.422	4.447	47.275	49.138	49.406
PI3Kd_Y685A_roginolisib	WLQYSFPLQLEPSAQTWGPGTLRLPNRALL	162	191	3	24	20.95	9.717	9.46	9.945	40.487	39.418	41.439	11.044	11.184	11.146	46.016	46.599	46.442	14.134	13.441	13.871	58.891	56.003	57.794
PI3Kd_Y685A_roginolisib	LQYSFPLQLEPSAQTWGPGTLRLPNRALL	163	191	3	23	20.63	10.364	10.176	10.293	45.062	44.242	44.753	12.374	11.892	11.48	53.799	51.705	49.915	14.72	14.218	14.504	64.001	61.815	63.059
PI3Kd_Y685A_roginolisib	QYSFPLQLEPSAQTWGPGTLRLPNRALL	164	191	3	22	20.56	10.332	10.178	10.342	46.964	46.263	47.01	12.438	11.928	11.498	56.535	54.22	52.262	15.003	14.393	14.49	68.198	65.421	65.863
PI3Kd_Y685A_roginolisib	PLQLEPSAQTWGPGTLRLPNRALL	168	191	3	19	19.42	10.709	10.524	10.076	56.364	55.389	53.03	12.135	12.007	11.304	63.871	63.196	59.494	13.672	13.546	13.869	71.96	71.297	72.993
PI3Kd_Y685A_roginolisib	QTWGPGTLRLPNRALL	176	191	3	12	17.82	7.482	7.412	7.182	62.35	61.77	59.852	8.354	8.189	8.036	69.617	68.242	66.968	9.422	8.975	9.451	78.521	74.795	78.756
PI3Kd_Y685A_roginolisib	WGPGTLRLPNRALL	178	191	3	10	17.91	5.354	5.474	5.175	53.541	54.739	51.745	6.265	6.198	5.754	62.65	61.982	57.538	7.178	7.152	7.316	71.784	71.522	73.164
PI3Kd_Y685A_roginolisib	LRLPNRALL	183	191	2	6	13.54	3.254	2.854	2.625	54.237	47.562	43.745	3.704	3.786	3.322	61.736	63.1	55.371	4.635	4.812	5.06	77.254	80.205	84.33
PI3Kd_Y685A_roginolisib	VNVKFEGSE	192	200	2	7	7.94	1.949	1.894	1.763	27.84	27.058	25.191	2.521	2.377	2.209	36.008	33.964	31.552	3	2.967	2.999	42.85	42.386	42.84
PI3Kd_Y685A_roginolisib	VNVKFEGSEE	192	201	2	8	8.28	2.382	2.164	2.113	29.771	27.054	26.41	2.913	2.883	2.622	36.408	36.032	32.769	3.531	3.491	3.767	44.142	43.642	47.082
PI3Kd_Y685A_roginolisib	VNVKFEGSEES	192	202	2	9	7.77	3.057	2.932	2.651	33.969	32.582	29.452	4.554	3.768	3.408	50.595	41.866	37.872	4.373	4.348	4.472	48.594	48.316	49.687
PI3Kd_Y685A_roginolisib	VNVKFEGSEESF	192	203	2	10	13.52	3.124	2.977	3.166	31.239	29.771	31.66	0	3.828	0	0	38.275	0	4.398	4.492	4.562	43.98	44.924	45.622
PI3Kd_Y685A_roginolisib	VNVKFEGSEESFT	192	204	2	11	12.71	3.745	3.59	3.456	34.048	32.636	31.418	4.355	4.456	3.93	39.593	40.512	35.729	5.056	5.053	5.205	45.966	45.939	47.316
PI3Kd_Y685A_roginolisib	ESFTFQVSTKDVPLAL	201	216	2	13	19.84	2.29	2.106	2.123	17.618	16.202	16.332	3.941	3.809	3.537	30.315	29.3	27.21	5.318	4.56	4.641	40.906	35.078	35.696
PI3Kd_Y685A_roginolisib	FTFQVSTKDVPLAL	203	216	2	11	19.61	1.476	1.324	1.328	13.42	12.034	12.075	3.045	2.934	2.684	27.686	26.677	24.397	3.69	3.714	3.863	33.55	33.761	35.119
PI3Kd_Y685A_roginolisib	TFQVSTKDVPLAL	204	216	2	10	17.14	1.338	1.204	1.215	13.375	12.044	12.147	2.936	2.848	2.613	29.364	28.485	26.132	3.635	3.524	3.671	36.352	35.24	36.71
PI3Kd_Y685A_roginolisib	FQVSTKDVPLAL	205	216	2	9	16.83	0.632	0.528	0.501	7.024	5.867	5.565	2.198	2.098	1.917	24.425	23.311	21.299	2.842	2.845	2.91	31.578	31.61	32.338
PI3Kd_Y685A_roginolisib	FQVSTKDVPLALM	205	217	2	10	18.58	0.535	0.421	0	5.346	4.211	0	2.111	2.62	1.803	21.112	26.204	18.029	0	3.247	3.13	0	32.47	31.299
PI3Kd_Y685A_roginolisib	QVSTKDVPLAL	206	216	2	8	14.06	0.632	0.99	0.681	7.904	12.377	8.516	2.255	2.118	1.847	28.188	26.47	23.089	3.063	2.897	2.999	38.286	36.215	37.488
PI3Kd_Y685A_roginolisib	VSTKDVPLAL	207	216	2	7	13.9	0.38	0.256	0	5.435	3.661	0	1.624	1.469	1.177	23.204	20.988	16.812	2.152	1.985	1.713	30.738	28.354	24.465
PI3Kd_Y685A_roginolisib	ACALRKKATV	218	227	2	8	1.75	1.882	2.045	1.555	23.525	25.568	19.432	3.236	3.144	2.823	40.446	39.302	35.282	4.168	4.262	4.366	52.104	53.272	54.57
PI3Kd_Y685A_roginolisib	CALRKKATV	219	227	2	7	0.88	1.641	1.026	0	23.448	14.654	0	3.215	3.22	3.594	45.929	46.007	51.342	3.953	4.144	0	56.475	59.197	0
PI3Kd_Y685A_roginolisib	CALRKKATVFRQPLVEQPED	219	238	3	16	8.43	6.297	6.299	7.059	39.358	39.368	44.121	8.248	8.088	7.603	51.553	50.55	47.519	9.346	9.34	9.418	58.415	58.372	58.863
PI3Kd_Y685A_roginolisib	ALRKKATVFRQPLVEQPED	220	238	3	15	8.09	6.608	6.571	6.464	44.057	43.809	43.091	8.052	8.228	7.464	53.679	54.851	49.759	8.956	8.989	9.112	59.707	59.929	60.744
PI3Kd_Y685A_roginolisib	LRKKATVFRQPLVEQPED	221	238	3	14	8.26	5.878	5.968	5.665	41.987	42.628	40.465	7.756	7.367	6.935	55.402	52.624	49.536	8.67	8.117	8.401	61.925	57.979	60.004
PI3Kd_Y685A_roginolisib	RKKATVFRQPLVEQPED	222	238	3	13	7.68	6.23	5.913	5.725	47.92	45.484	44.035	7.959	7.468	7.17	61.224	57.448	55.155	8.485	8.106	8.348	65.268	62.352	64.217
PI3Kd_Y685A_roginolisib	FRQPLVEQPED	228	238	2	7	9.34	3.82	3.626	3.615	54.572	51.801	51.647	4.701	4.547	4.393	67.161	64.953	62.751	5.203	5.262	5.33	74.335	75.165	76.148
PI3Kd_Y685A_roginolisib	YTLQVNGRHEYL	239	250	2	10	12.58	0.356	0.332	0.234	3.555	3.32	2.34	0.392	0.325	0.227	3.918	3.254	2.273	0.449	0.444	0.446	4.492	4.442	4.458
PI3Kd_Y685A_roginolisib	YTLQVNGRHEYLYGSY	239	254	3	14	14.1	1.008	0.941	0.817	7.198	6.724	5.836	1.039	1.001	0.92	7.42	7.153	6.574	1.677	1.619	1.725	11.981	11.564	12.322
PI3Kd_Y685A_roginolisib	YTLQVNGRHEYLYGSYPLCQ	239	258	3	17	16.2	1.074	1.005	2.361	6.32	5.914	13.886	1.125	1.128	1.022	6.615	6.637	6.011	1.77	1.737	1.767	10.412	10.216	10.393
PI3Kd_Y685A_roginolisib	YTLQVNGRHEYLYGSYPLCQF	239	259	2	18	19.94	1.061	0.948	0.893	5.894	5.267	4.959	1.029	1.077	0.967	5.714	5.985	5.37	1.846	1.583	1.622	10.256	8.793	9.012
PI3Kd_Y685A_roginolisib	LQVNGRHEYL	241	250	2	8	12.69	0.518	0.516	0	6.474	6.448	0	0.439	0.466	0.15	5.482	5.831	1.869	0.595	0.395	0.679	7.432	4.94	8.486
PI3Kd_Y685A_roginolisib	QVNGRHEYL	242	250	2	7	7.34	0.319	0.482	0.145	4.553	6.883	2.075	0	0.33	0.636	0	4.721	9.086	0.418	0.56	0	5.966	7.995	0
PI3Kd_Y685A_roginolisib	QVNGRHEYLYGSYPLCQF	242	259	3	15	19.07	0.964	0.782	0.768	6.427	5.215	5.121	0.952	0.99	0.788	6.348	6.601	5.251	1.432	1.38	1.413	9.545	9.199	9.421
PI3Kd_Y685A_roginolisib	YGSYPLCQ	251	258	1	5	13.44	0.701	0.541	0.397	14.016	10.814	7.944	0	0.543	0.371	0	10.862	7.424	0.483	0	0.612	9.659	0	12.243
PI3Kd_Y685A_roginolisib	YGSYPLCQF	251	259	2	6	20.27	0.595	0.301	0.323	9.918	5.013	5.388	0.346	0.235	0.394	5.772	3.922	6.569	0.319	0.277	0.158	5.309	4.619	2.632
PI3Kd_Y685A_roginolisib	FQYICS	259	264	1	4	13.32	0.75	0.663	0.721	18.762	16.573	18.027	0.895	0.886	0.874	22.367	22.138	21.853	0.996	0.984	0.971	24.902	24.609	24.284
PI3Kd_Y685A_roginolisib	FQYICSCL	259	266	1	6	20.69	0.302	0.337	0	5.035	5.61	0	0.893	0.177	0.384	14.876	2.948	6.401	0	0.302	0	0	5.034	0
PI3Kd_Y685A_roginolisib	QYICSCL	260	266	1	5	17.41	0.022	0.016	0.016	0.432	0.318	0.311	0.034	0.018	0.031	0.69	0.354	0.613	0.08	0.091	0.081	1.591	1.816	1.611
PI3Kd_Y685A_roginolisib	CLHSGLTPHL	265	274	2	7	10.56	0.988	0.922	1.028	14.114	13.178	14.693	1.208	1.142	1.021	17.256	16.312	14.58	1.52	1.449	1.493	21.71	20.701	21.334
PI3Kd_Y685A_roginolisib	CLHSGLTPHLTM	265	276	2	9	12.73	1.035	1.002	1.225	11.5	11.138	13.607	2.279	2.334	2.374	25.327	25.931	26.381	3.734	3.435	3.654	41.49	38.17	40.604
PI3Kd_Y685A_roginolisib	CLHSGLTPHLTMVHSSSIL	265	283	3	16	14.19	0.631	0.643	0.489	3.943	4.017	3.058	0.659	0.713	0.489	4.118	4.458	3.059	0.784	0.81	0.844	4.897	5.061	5.277
PI3Kd_Y685A_roginolisib	HSGLTPHL	267	274	2	5	8.4	0.87	0.819	0.822	17.398	16.383	16.444	1.141	1.046	0.951	22.811	20.922	19.024	1.315	1.463	1.365	26.307	29.259	27.304
PI3Kd_Y685A_roginolisib	HSGLTPHLTMVHSSSIL	267	283	3	14	13.26	0.664	0.62	0.54	4.739	4.427	3.859	0.727	0.667	0.549	5.196	4.766	3.921	0.936	0.835	0.899	6.685	5.967	6.42
PI3Kd_Y685A_roginolisib	HSGLTPHLTMVHSSSILA	267	284	3	15	12.55	0.783	0.699	0.652	5.223	4.658	4.347	0.853	0.705	0.606	5.688	4.7	4.037	1.096	1.166	1.088	7.306	7.777	7.25
PI3Kd_Y685A_roginolisib	TMVHSSSIL	275	283	2	7	11.22	0.045	-0.044	-0.042	0.639	-0.634	-0.601	0.157	0.076	0.04	2.24	1.081	0.575	0.287	0.324	0.312	4.107	4.631	4.455
PI3Kd_Y685A_roginolisib	VHSSSIL	277	283	1	5	8.93	0.151	0.165	0.095	3.028	3.295	1.908	0.18	0.222	0.076	3.591	4.433	1.522	0.416	0.471	0.658	8.323	9.421	13.155
PI3Kd_Y685A_roginolisib	RDEQSNPAPQVQKPRAKPPPIPAKKPSSVSL	286	316	5	21	6.6	14.072	13.875	13.191	67.009	66.07	62.817	14.376	14.189	13.424	68.459	67.569	63.924	14.53	13.762	14.409	69.193	65.532	68.613
PI3Kd_Y685A_roginolisib	PQVQKPRAKPPPIPAKKPSSVSL	294	316	4	15	6.83	11.324	11.467	11.039	75.491	76.445	73.593	11.814	11.476	11.095	78.758	76.503	73.969	11.283	11.21	11.965	75.221	74.734	79.764
PI3Kd_Y685A_roginolisib	WSLEQPFRIEL	317	327	2	8	21.01	0.791	0.756	0.652	9.882	9.452	8.15	1.208	1.192	1.166	15.096	14.906	14.581	2.052	1.885	1.905	25.655	23.565	23.817
PI3Kd_Y685A_roginolisib	IQGSKVNADE	328	337	2	8	2.02	1.055	0.733	0.825	13.188	9.159	10.312	2.622	2.337	2.25	32.781	29.208	28.122	3.815	3.787	3.756	47.682	47.333	46.956
PI3Kd_Y685A_roginolisib	FDYKDQLKTGERCL	426	439	3	12	12.94	2.02	1.936	2.524	16.836	16.134	21.031	3.622	3.428	3.38	30.182	28.57	28.171	3.835	3.897	4.181	31.961	32.475	34.845
PI3Kd_Y685A_roginolisib	YKDQLKTGERC	428	438	3	9	3.77	3.354	3.186	3.164	37.272	35.395	35.156	4.576	4.225	3.757	50.847	46.945	41.741	5.325	4.806	4.963	59.17	53.4	55.145
PI3Kd_Y685A_roginolisib	LNPTGTVRSNPNTDSAAAL	453	471	2	15	9.32	4.313	3.66	3.211	28.753	24.401	21.404	6.364	5.993	5.732	42.424	39.953	38.216	8.211	8.138	8.504	54.742	54.252	56.695
PI3Kd_Y685A_roginolisib	ICLPEVAPHPVYY	473	485	2	8	17.07	3.308	3.128	3.248	41.347	39.098	40.606	4.33	4.427	4.509	54.122	55.337	56.364	5.485	5.373	5.335	68.559	67.158	66.692
PI3Kd_Y685A_roginolisib	ICLPEVAPHPVYYPAL	473	488	2	10	18.9	2.775	2.632	2.949	27.753	26.32	29.486	3.858	4.122	3.55	38.577	41.223	35.5	5.316	5.111	5.26	53.155	51.106	52.597
PI3Kd_Y685A_roginolisib	PEVAPHPVYYPAL	476	488	2	8	15.6	1.235	1.068	0	15.435	13.344	0	2.099	2.129	0	26.239	26.613	0	2.653	2.245	2.273	33.161	28.064	28.415
PI3Kd_Y685A_roginolisib	EKILEL	489	494	1	4	14.67	0	-0.063	-0.012	0	-1.587	-0.293	0	0	0.045	0	0	1.116	0	0.229	0.51	0	5.734	12.75
PI3Kd_Y685A_roginolisib	EKILELGRHSE	489	499	3	9	7.81	0.351	0.261	0.225	3.899	2.896	2.503	0.799	0.703	0.581	8.876	7.809	6.455	1.635	1.661	1.695	18.168	18.455	18.831
PI3Kd_Y685A_roginolisib	EKILELGRHSEC	489	500	2	10	8.68	0.809	0.779	0.89	8.091	7.785	8.902	1.238	1.158	0.931	12.381	11.583	9.308	2.042	1.91	2.112	20.419	19.1	21.123
PI3Kd_Y685A_roginolisib	EKILELGRHSECVHVTE	489	505	2	15	9.61	2.749	2.629	2.739	18.324	17.528	18.257	3.108	3.045	2.711	20.721	20.302	18.072	4.356	4.43	4.443	29.038	29.535	29.618
PI3Kd_Y685A_roginolisib	EKILELGRHSECVHVTEE	489	506	2	16	9.66	2.915	2.775	2.593	18.218	17.341	16.204	0	3.34	2.601	0	20.874	16.259	4.077	4.539	4.645	25.481	28.37	29.029
PI3Kd_Y685A_roginolisib	EKILELGRHSECVHVTEEEQ	489	508	3	18	9.56	3.111	2.929	2.696	17.282	16.271	14.978	4.061	3.628	3.143	22.561	20.154	17.46	5.308	5.425	5.505	29.488	30.141	30.581
PI3Kd_Y685A_roginolisib	KILELGRHSEC	490	500	2	9	7.53	0.534	0.601	0.63	5.931	6.678	6.997	0	0.895	0.652	0	9.948	7.24	1.837	1.642	1.751	20.412	18.241	19.455
PI3Kd_Y685A_roginolisib	LGRHSECVHVTE	494	505	3	10	4.19	2.873	2.79	2.556	28.734	27.903	25.563	3.277	3.015	2.682	32.769	30.151	26.821	3.705	3.566	3.677	37.054	35.662	36.765
PI3Kd_Y685A_roginolisib	LGRHSECVHVTEE	494	506	3	11	4.35	3.142	3.004	3.128	28.56	27.309	28.438	3.67	3.381	3.011	33.359	30.739	27.377	3.954	3.819	3.91	35.949	34.721	35.544
PI3Kd_Y685A_roginolisib	LGRHSECVHVTEEEQ	494	508	3	13	4.52	3.145	3.009	2.84	24.189	23.148	21.85	3.554	3.858	3.047	27.339	29.678	23.441	4.57	4.56	4.682	35.155	35.073	36.019
PI3Kd_Y685A_roginolisib	GRHSECVHVTEE	495	506	3	10	3.31	3.346	3.173	3.247	33.455	31.729	32.469	3.65	3.607	3.262	36.495	36.065	32.617	4.228	3.965	4.476	42.276	39.651	44.76
PI3Kd_Y685A_roginolisib	CVHVTEEEQ	500	508	2	7	3.78	2.297	2.156	1.893	32.819	30.807	27.04	3.006	2.634	2.38	42.942	37.627	33.997	4.124	3.89	3.916	58.916	55.572	55.946
PI3Kd_Y685A_roginolisib	VHVTEE	501	506	1	4	2.22	1.958	1.989	1.911	48.944	49.73	47.784	2.287	2.278	0	57.166	56.957	0	2.579	2.86	2.879	64.482	71.5	71.968
PI3Kd_Y685A_roginolisib	VHVTEEEQ	501	508	1	6	2.54	1.961	1.842	1.769	32.691	30.706	29.48	0	2.285	2.161	0	38.082	36.025	3.6	0	3.553	60.007	0	59.221
PI3Kd_Y685A_roginolisib	VHVTEEEQLQL	501	511	2	9	13.45	1.268	1.194	1.02	14.086	13.264	11.328	1.851	1.745	1.414	20.563	19.387	15.71	4.568	3.842	3.93	50.756	42.694	43.667
PI3Kd_Y685A_roginolisib	REILERRGSGEL	512	523	2	10	7.32	2.799	2.732	2.452	27.989	27.323	24.518	3.352	3.047	2.607	33.523	30.474	26.067	3.269	3.137	3.314	32.686	31.371	33.141
PI3Kd_Y685A_roginolisib	YEHEKDLVWKLRHEVQEHFPEALARL	524	549	4	23	18.97	0.862	0.628	0.678	3.746	2.731	2.948	1.468	1.339	1.205	6.383	5.82	5.24	2.334	2.473	4.096	10.148	10.75	17.809
PI3Kd_Y685A_roginolisib	HEKDLVWKLRHEVQEHFPEAL	526	546	4	18	17.61	0.575	0.354	1.047	3.193	1.969	5.815	1.402	1.269	1.163	7.787	7.051	6.462	2.109	2.104	2.075	11.716	11.689	11.528
PI3Kd_Y685A_roginolisib	LLVTKWNKHEDVAQM	550	564	2	13	11.35	0.238	0.232	0	1.833	1.787	0	0	0.462	0	0	3.55	0	0.811	0.593	0.66	6.239	4.563	5.075
PI3Kd_Y685A_roginolisib	LLVTKWNKHEDVAQML	550	565	3	14	15.35	0.051	-0.015	-0.05	0.364	-0.105	-0.355	0.261	0.182	0.071	1.863	1.302	0.507	0.35	0.354	0.438	2.502	2.527	3.132
PI3Kd_Y685A_roginolisib	CSWPEL	569	574	1	3	19.09	-0.004	-0.056	-0.038	-0.141	-1.873	-1.254	0.445	0.495	0.532	14.838	16.509	17.717	1.124	1.343	1.221	37.463	44.763	40.71
PI3Kd_Y685A_roginolisib	LDFSFPDCHVGSF	583	595	2	10	20.72	0.744	0.555	0.682	7.439	5.552	6.819	1.773	1.632	1.566	17.731	16.325	15.658	3.55	3.284	3.369	35.498	32.841	33.694
PI3Kd_Y685A_roginolisib	FSFPDCHVGSF	585	595	2	8	19.41	0.442	0.404	0.246	5.519	5.048	3.079	0.913	0.961	0.666	11.408	12.01	8.32	2.079	2.161	2.093	25.983	27.009	26.158
PI3Kd_Y685A_roginolisib	AIKSLRKLTDDEL	596	608	2	11	11.26	0.763	0.791	0.793	6.94	7.191	7.206	1.494	1.207	0.918	13.585	10.976	8.345	2.259	1.938	1.828	20.535	17.62	16.62
PI3Kd_Y685A_roginolisib	FQYLLQ	609	614	1	4	16.86	0.061	0.045	0.047	1.518	1.134	1.166	0.04	0.057	0.006	1.011	1.419	0.147	0.109	0.089	0.096	2.733	2.228	2.398
PI3Kd_Y685A_roginolisib	LVQVLKYESYL	615	625	2	9	18.4	1.139	1.078	1.12	12.659	11.982	12.447	1.907	1.894	1.854	21.19	21.041	20.605	2.554	2.606	2.523	28.382	28.958	28.036
PI3Kd_Y685A_roginolisib	VQVLKYESY	616	624	2	7	11.98	1.035	0.931	0.8	14.78	13.302	11.432	1.663	1.778	1.587	23.762	25.407	22.671	2.018	1.739	1.882	28.835	24.845	26.888
PI3Kd_Y685A_roginolisib	VQVLKYESYL	616	625	2	8	16.62	1.139	1.054	1.318	14.241	13.177	16.48	1.843	1.853	1.781	23.035	23.156	22.266	2.441	2.559	2.523	30.516	31.986	31.539
PI3Kd_Y685A_roginolisib	VQVLKYESYLDC	616	627	2	10	16.74	1.13	1.144	1.268	11.298	11.438	12.677	1.98	1.908	0	19.796	19.081	0	2.916	0	3.103	29.158	0	31.03
PI3Kd_Y685A_roginolisib	ELTKFLL	628	634	2	5	18.5	-0.093	-0.056	-0.024	-1.857	-1.113	-0.481	0.033	-0.052	-0.041	0.661	-1.03	-0.821	-0.005	-0.018	-0.052	-0.096	-0.351	-1.045
PI3Kd_Y685A_roginolisib	ELTKFLLDRALANRKIGHFL	628	647	3	18	16.98	0.147	0.15	0.207	0.816	0.835	1.152	0.187	0.235	0.064	1.042	1.305	0.354	0.228	0.288	0.317	1.264	1.598	1.763
PI3Kd_Y685A_roginolisib	LTKFLLDRALANRKIGHF	629	646	3	16	13.71	0	0.054	-0.038	0	0.34	-0.238	0.198	0.088	0.082	1.239	0.548	0.513	0.471	0.244	0.184	2.942	1.526	1.151
PI3Kd_Y685A_roginolisib	TKFLLD	630	635	1	4	13.76	0.079	-0.044	0.29	1.978	-1.098	7.262	0	-0.034	-0.005	0	-0.84	-0.12	0.119	-0.048	0.006	2.98	-1.206	0.153
PI3Kd_Y685A_roginolisib	TKFLLDRALANRKIGHF	630	646	3	15	13.14	0.192	0.02	0.165	1.278	0.135	1.099	0.259	0.221	0.185	1.728	1.474	1.231	0.444	0.29	0.575	2.963	1.937	3.832
PI3Kd_Y685A_roginolisib	TKFLLDRALANRKIGHFL	630	647	3	16	15.42	0	-0.189	0	0	-1.18	0	0.699	0.079	0.074	4.371	0.495	0.459	0.224	0.892	0.169	1.402	5.576	1.054
PI3Kd_Y685A_roginolisib	LLDRALANRKIGHF	633	646	3	12	10.44	0.156	0.096	0.067	1.302	0.802	0.56	0	0.222	0.174	0	1.85	1.451	0.482	0.501	0.403	4.02	4.172	3.362
PI3Kd_Y685A_roginolisib	LLDRALANRKIGHFL	633	647	2	13	13.01	0.04	0.062	0.083	0.307	0.478	0.639	0.152	0.134	0.154	1.168	1.028	1.182	0.214	0.204	0.306	1.65	1.57	2.355
PI3Kd_Y685A_roginolisib	LLDRALANRKIGHFLFWHL	633	651	4	17	18.75	0.156	0.071	0	0.916	0.418	0	0.195	0	0.066	1.148	0	0.386	0.167	0.229	0	0.981	1.346	0
PI3Kd_Y685A_roginolisib	DRALANRKIGHF	635	646	3	10	7.15	0.075	0.081	0.069	0.752	0.811	0.691	0.349	0.13	0.162	3.492	1.301	1.616	0.566	0.556	0.536	5.657	5.56	5.364
PI3Kd_Y685A_roginolisib	RALANRKIGHF	636	646	2	9	5.67	0.109	0.037	-0.005	1.212	0.413	-0.051	0.192	0.233	0.145	2.132	2.588	1.61	0.355	0.219	0.103	3.944	2.428	1.141
PI3Kd_Y685A_roginolisib	LFWHLRSEM	647	655	2	7	17.01	0.075	-0.04	-0.023	1.071	-0.569	-0.328	0.066	-0.046	0.027	0.942	-0.653	0.391	0.001	0.098	0.173	0.008	1.397	2.472
PI3Kd_Y685A_roginolisib	FWHLRSEM	648	655	2	6	14.83	0	-0.337	-0.347	0	-5.617	-5.776	-0.193	-0.222	-0.111	-3.216	-3.703	-1.855	-0.203	-0.209	-0.188	-3.384	-3.479	-3.133
PI3Kd_Y685A_roginolisib	RSEMHVPSVA	652	661	2	7	8.26	0.998	0.893	0.841	14.26	12.761	12.021	1.051	0.989	0.782	15.016	14.124	11.178	1.229	1.285	1.366	17.556	18.362	19.508
PI3Kd_Y685A_roginolisib	HVPSVA	656	661	1	3	3.15	0.796	0.81	0.876	26.538	27.006	29.208	0.902	0.83	0.871	30.082	27.652	29.039	1.046	1.137	1.106	34.871	37.916	36.88
PI3Kd_Y685A_roginolisib	LRFGLIL	662	668	2	5	20.81	0.03	0.003	-0.028	0.591	0.07	-0.563	0.016	-0.025	0.014	0.315	-0.502	0.275	-0.009	0.025	-0.003	-0.173	0.507	-0.062
PI3Kd_Y685A_roginolisib	LRFGLILE	662	669	2	6	19.96	0.066	0.007	0.007	1.106	0.111	0.116	0.049	0.011	-0.01	0.821	0.187	-0.163	-0.07	0.036	-0.008	-1.164	0.596	-0.133
PI3Kd_Y685A_roginolisib	LRFGLILEA	662	670	2	7	20.34	0.112	0.012	0.015	1.594	0.173	0.217	-0.004	0.012	-0.011	-0.063	0.165	-0.162	0.046	0.046	0.098	0.658	0.664	1.401
PI3Kd_Y685A_roginolisib	RFGLIL	663	668	1	4	19.79	-0.006	-0.059	0.04	-0.151	-1.475	1.005	0	-0.011	0.007	0	-0.271	0.164	0.085	0.416	0.007	2.12	10.408	0.182
PI3Kd_Y685A_roginolisib	EAYCRGSTHHMKVL	669	682	3	12	6.03	-0.061	0.331	0.096	-0.508	2.758	0.804	0.501	0	0.36	4.173	0	2.998	0.99	1.055	0.923	8.25	8.789	7.688
PI3Kd_Y685A_roginolisib	YCRGSTHHMKVLM	671	683	3	11	6.5	0.293	0.037	0.438	2.667	0.333	3.982	0.425	0.342	0.458	3.867	3.111	4.159	1.021	0.993	0.972	9.282	9.029	8.833
PI3Kd_Y685A_roginolisib	MKQGEALSKL	683	692	2	8	9.19	0.13	0.126	0.697	1.624	1.569	8.713	0.2	0.212	0.139	2.5	2.654	1.734	0.354	0.523	0.546	4.421	6.54	6.828
PI3Kd_Y685A_roginolisib	KQGEALSKL	684	692	2	7	7.58	0.072	0.02	-0.004	1.032	0.288	-0.052	0.126	0.045	0.08	1.8	0.638	1.145	0.208	0.219	0.214	2.978	3.134	3.056
PI3Kd_Y685A_roginolisib	KQGEALSKLKALND	684	697	3	12	8.77	0.246	0.17	0.114	2.048	1.418	0.949	0.251	0.146	0.177	2.096	1.218	1.473	0.33	0.358	0.319	2.747	2.982	2.662
PI3Kd_Y685A_roginolisib	LSKLKALND	689	697	2	7	6.54	0.191	0.1	0.135	2.731	1.428	1.93	0.337	0.072	0.134	4.81	1.022	1.91	0.185	0.172	0.278	2.636	2.455	3.974
PI3Kd_Y685A_roginolisib	SKLKALND	690	697	2	6	3.65	0.139	0.066	0.028	2.315	1.094	0.459	0.159	0.09	0.075	2.648	1.503	1.248	0.079	0.126	0.112	1.309	2.106	1.873
PI3Kd_Y685A_roginolisib	SKLKALNDF	690	698	2	7	11.81	0.145	0.056	0.126	2.078	0.793	1.795	0.12	0.083	0.076	1.716	1.179	1.08	0.07	0.089	0.093	1.001	1.271	1.327
PI3Kd_Y685A_roginolisib	FVKLSSQKTPKPQTKE	698	713	2	12	4.11	3.243	3.055	3.041	27.028	25.46	25.342	5.334	5.01	4.814	44.451	41.753	40.113	6.16	5.75	5.926	51.337	47.915	49.385
PI3Kd_Y685A_roginolisib	FVKLSSQKTPKPQTKE	698	713	3	12	4.11	3.211	2.898	2.971	26.757	24.154	24.758	5.357	5.009	4.711	44.642	41.739	39.258	6.007	5.797	5.933	50.06	48.31	49.44
PI3Kd_Y685A_roginolisib	FVKLSSQKTPKPQTKELMHL	698	717	4	16	9.92	1.985	1.812	1.864	12.408	11.326	11.647	3.091	2.902	2.627	19.321	18.139	16.421	3.952	3.591	3.744	24.701	22.443	23.398
PI3Kd_Y685A_roginolisib	FVKLSSQKTPKPQTKELMHLCM	698	719	3	18	12.79	1.727	1.632	1.56	9.594	9.067	8.664	2.715	2.56	2.145	15.082	14.22	11.915	3.391	3.217	3.5	18.841	17.874	19.445
PI3Kd_Y685A_roginolisib	VKLSSQKTPKPQTKE	699	713	3	11	1.8	3.372	3.064	3.182	30.652	27.855	28.928	5.873	5.377	5.122	53.395	48.883	46.568	6.514	6.304	6.292	59.217	57.311	57.202
PI3Kd_Y685A_roginolisib	VKLSSQKTPKPQTKE	699	713	4	11	1.8	3.622	3.381	0	32.93	30.741	0	5.884	5.402	5.144	53.488	49.109	46.766	6.513	6.306	6.474	59.209	57.328	58.856
PI3Kd_Y685A_roginolisib	RQEAYL	720	725	1	4	9.21	1.397	1.379	1.306	34.915	34.479	32.65	1.639	1.532	1.434	40.968	38.311	35.838	2.512	2.567	2.522	62.794	64.186	63.05
PI3Kd_Y685A_roginolisib	RQEAYLEA	720	727	2	6	8.96	1.371	1.496	1.343	22.855	24.927	22.39	2.802	2.695	2.499	46.701	44.922	41.649	0	3.963	3.946	0	66.053	65.767
PI3Kd_Y685A_roginolisib	EALSHLQSPLDPSTL	726	740	2	11	15.63	0.319	0.252	0.236	2.898	2.29	2.146	1.158	1.035	1.017	10.523	9.408	9.246	2.548	2.558	2.579	23.162	23.258	23.446
PI3Kd_Y685A_roginolisib	EALSHLQSPLDPSTLL	726	741	2	12	18.61	0.268	0.24	0.399	2.23	2	3.325	1.121	1.011	1.31	9.338	8.424	10.918	2.512	2.559	2.858	20.933	21.323	23.814
PI3Kd_Y685A_roginolisib	LSHLQSPLDPSTL	728	740	2	9	14.61	0.271	0.185	0.219	3.013	2.061	2.437	1.085	1.022	0.953	12.06	11.354	10.584	2.461	2.561	2.551	27.341	28.457	28.348
PI3Kd_Y685A_roginolisib	LSHLQSPLDPSTLL	728	741	2	10	18.16	0.295	0.233	0	2.946	2.334	0	1.127	1.018	1.094	11.274	10.176	10.936	2.55	2.572	2.58	25.503	25.717	25.804
PI3Kd_Y685A_roginolisib	LAEVCVE	741	747	1	5	9.97	1.155	1.12	1.164	23.092	22.393	23.277	1.712	1.762	1.601	34.247	35.23	32.011	1.975	1.945	1.981	39.505	38.898	39.626
PI3Kd_Y685A_roginolisib	VCVEQCTF	744	751	1	6	15.13	1.412	1.164	1.268	23.525	19.392	21.141	2.625	2.653	2.389	43.746	44.215	39.81	2.847	2.857	2.932	47.458	47.615	48.874
PI3Kd_Y685A_roginolisib	MDSKMKPLW	752	760	2	6	15.04	0.875	1.078	0	14.583	17.968	0	0	0.828	0.86	0	13.802	14.337	1.123	1.295	1.317	18.711	21.581	21.948
PI3Kd_Y685A_roginolisib	MDSKMKPLWIM	752	762	2	8	19.31	0.808	0.8	0.832	10.105	9.996	10.394	0.915	0.858	0.702	11.437	10.722	8.769	1.176	1.082	1.097	14.706	13.526	13.709
PI3Kd_Y685A_roginolisib	DSKMKPLW	753	760	2	5	14.85	1.097	0.864	0.373	21.932	17.287	7.46	0.855	0.86	0.816	17.097	17.198	16.321	1.142	1.131	1.104	22.844	22.626	22.072
PI3Kd_Y685A_roginolisib	DSKMKPLWIM	753	762	3	7	19.37	0.735	0.732	0.595	10.494	10.464	8.502	0.789	0.699	0.671	11.272	9.98	9.591	0	1.069	1.067	0	15.272	15.238
PI3Kd_Y685A_roginolisib	IMYSNE	761	766	1	4	6.46	1.421	1.334	1.307	35.528	33.344	32.67	1.703	1.579	1.425	42.582	39.469	35.631	2.179	2.139	2.113	54.468	53.485	52.834
PI3Kd_Y685A_roginolisib	YSNEEAGSGGSVGIIFKNGDDLRQDM	763	788	3	24	16.81	4.115	3.894	3.628	17.144	16.223	15.117	6.169	5.743	5.356	25.704	23.928	22.318	8.089	7.873	7.834	33.704	32.805	32.642
PI3Kd_Y685A_roginolisib	EAGSGGSVGIIFKNGDDL	767	784	2	16	16.49	2.157	1.757	0	13.482	10.978	0	2.683	2.591	2.089	16.768	16.197	13.058	3.408	3.382	3.536	21.3	21.135	22.097
PI3Kd_Y685A_roginolisib	EAGSGGSVGIIFKNGDDLRQDM	767	788	2	20	16.38	2.171	1.97	2.055	10.856	9.849	10.275	4.263	4.106	3.61	21.314	20.531	18.048	6.359	6.386	5.981	31.795	31.931	29.905
PI3Kd_Y685A_roginolisib	EAGSGGSVGIIFKNGDDLRQDMLT	767	790	3	22	17.66	1.9	1.677	1.632	8.638	7.625	7.419	3.871	3.704	2.797	17.597	16.836	12.713	5.815	5.715	5.818	26.431	25.978	26.444
PI3Kd_Y685A_roginolisib	MDVLWKQEGLD	797	807	2	9	16.19	0.125	0.103	0.067	1.39	1.149	0.744	0	0.325	0.311	0	3.616	3.458	0.941	0.898	0.843	10.459	9.973	9.367
PI3Kd_Y685A_roginolisib	MDVLWKQEGLDL	797	808	2	10	19.55	0.112	0.079	0.062	1.121	0.787	0.62	0.281	0.246	0.268	2.812	2.464	2.679	0.794	0.734	0.725	7.935	7.338	7.248
PI3Kd_Y685A_roginolisib	DVLWKQEGLDL	798	808	2	9	18.63	0.077	0.04	0.326	0.853	0.44	3.617	0.343	0.227	0.233	3.815	2.523	2.594	0	0.847	0.92	0	9.412	10.219
PI3Kd_Y685A_roginolisib	VLWKQEGLDL	799	808	2	8	17.63	0.122	0.08	0.294	1.528	1.006	3.681	0.34	0.276	0.217	4.25	3.453	2.71	0.869	0.832	0.87	10.866	10.401	10.877
PI3Kd_Y685A_roginolisib	WKQEGLD	801	807	2	5	8.15	0.118	0.075	0.059	2.354	1.505	1.175	0.444	0.348	0.314	8.889	6.967	6.29	1.203	1.176	1.22	24.056	23.514	24.41
PI3Kd_Y685A_roginolisib	WKQEGLDL	801	808	2	6	14.9	-0.037	-0.113	-0.093	-0.623	-1.888	-1.543	0.231	0.157	0.125	3.846	2.614	2.08	0.72	0.762	0.789	11.999	12.693	13.143
PI3Kd_Y685A_roginolisib	LRMTPYGCLPTGDRTGL	808	824	3	13	15.28	0.566	0.443	0.315	4.356	3.408	2.424	0.58	0.469	0.436	4.462	3.608	3.356	0.953	0.935	0.982	7.333	7.19	7.555
PI3Kd_Y685A_roginolisib	LRMTPYGCLPTGDRTGLIE	808	826	3	15	16	0.559	0.444	0.324	3.724	2.958	2.158	0.6	0.528	0.421	4	3.518	2.806	0.89	0.951	0.965	5.93	6.339	6.436
PI3Kd_Y685A_roginolisib	RMTPYGCLPTGDRTGL	809	824	3	12	13.91	0.605	0.483	0.325	5.042	4.026	2.708	0.698	0.589	0.466	5.815	4.905	3.887	0.93	0.941	0.805	7.752	7.84	6.712
PI3Kd_Y685A_roginolisib	RMTPYGCLPTGDRTGLIE	809	826	3	14	14.7	0.584	0.43	0	4.17	3.069	0	0.597	0.538	0.441	4.265	3.842	3.147	0.763	0.913	1.021	5.45	6.519	7.29
PI3Kd_Y685A_roginolisib	TPYGCLPTGDRTGLIE	811	826	2	13	14.73	0.566	0.316	0.513	4.355	2.427	3.945	0.831	0.621	0.27	6.391	4.774	2.077	0.95	1.112	0.98	7.307	8.551	7.536
PI3Kd_Y685A_roginolisib	VVLRSDTIA	827	835	1	7	8.22	0.984	0.935	0.893	14.062	13.359	12.76	1.387	1.281	1.221	19.82	18.295	17.45	2.037	2.072	2.123	29.106	29.606	30.323
PI3Kd_Y685A_roginolisib	VVLRSDTIA	827	835	2	7	8.22	0.985	0.896	0.938	14.073	12.796	13.401	1.419	1.266	1.223	20.273	18.084	17.467	2.093	2.118	2.083	29.896	30.256	29.763
PI3Kd_Y685A_roginolisib	VVLRSDTIAN	827	836	1	8	6.94	1.042	0.953	0.941	13.028	11.913	11.757	1.48	1.363	1.309	18.504	17.036	16.366	2.203	2.255	2.251	27.532	28.191	28.14
PI3Kd_Y685A_roginolisib	VVLRSDTIAN	827	836	2	8	6.94	1.008	0.957	0.933	12.601	11.966	11.659	1.461	1.341	1.315	18.266	16.761	16.441	2.14	2.235	2.246	26.756	27.943	28.071
PI3Kd_Y685A_roginolisib	VVLRSDTIANIQL	827	839	2	11	16.8	0.956	0.894	0.85	8.694	8.127	7.73	1.66	1.567	1.497	15.089	14.241	13.607	3.109	3.158	3.154	28.261	28.709	28.669
PI3Kd_Y685A_roginolisib	VLRSDTIANIQL	828	839	2	10	16.35	0.158	0.235	0.445	1.576	2.354	4.446	1.023	0.551	0.966	10.226	5.513	9.664	2.01	1.568	1.517	20.098	15.68	15.171
PI3Kd_Y685A_roginolisib	RSDTIANIQL	830	839	2	8	15.21	0.075	0.061	0.034	0.934	0.766	0.424	0.443	0.369	0.426	5.542	4.61	5.329	1.269	1.368	1.306	15.865	17.104	16.324
PI3Kd_Y685A_roginolisib	IANIQL	834	839	1	4	14.45	0.029	0.091	0	0.737	2.276	0	0.334	0.243	0.089	8.343	6.07	2.23	1.213	1.154	1.403	30.314	28.858	35.082
PI3Kd_Y685A_roginolisib	AATAAFNKDAL	845	855	2	9	10.88	6.158	5.988	6.031	68.417	66.538	67.016	7.278	7.27	6.581	80.868	80.774	73.124	7.155	6.911	7.103	79.499	76.794	78.92
PI3Kd_Y685A_roginolisib	AATAAFNKDALL	845	856	2	10	14.33	5.808	5.892	5.26	58.085	58.922	52.603	6.804	6.72	5.762	68.041	67.205	57.621	6.804	6.911	6.944	68.038	69.105	69.438
PI3Kd_Y685A_roginolisib	AATAAFNKDALLNWLKSKNPGEAL	845	868	4	21	19.18	7.192	7.052	7.061	34.245	33.582	33.623	9.931	9.739	9.109	47.291	46.376	43.375	0	11.257	11.358	0	53.603	54.084
PI3Kd_Y685A_roginolisib	FNKDALL	850	856	2	5	12.91	1.975	1.874	1.946	39.498	37.479	38.913	2.742	2.649	2.319	54.832	52.979	46.382	2.72	2.782	2.78	54.395	55.644	55.59
PI3Kd_Y685A_roginolisib	FNKDALLNWLKSKNPGEAL	850	868	3	16	18.94	4.46	4.177	4.42	27.877	26.108	27.626	6.827	6.809	6.467	42.671	42.553	40.422	8.397	8.339	8.397	52.484	52.118	52.479
PI3Kd_Y685A_roginolisib	FNKDALLNWLKSKNPGEALDRAIEE	850	874	4	22	19.72	4.423	4.422	5.119	20.104	20.101	23.268	0	7.945	8.67	0	36.114	39.409	9.66	9.615	9.729	43.909	43.705	44.223
PI3Kd_Y685A_roginolisib	NKDALL	851	856	1	4	9.27	1.191	1.081	1.114	29.783	27.023	27.844	1.979	1.84	1.72	49.472	45.991	43.012	2.049	2.058	1.993	51.216	51.444	49.822
PI3Kd_Y685A_roginolisib	NKDALLNWLKSKNPGEAL	851	868	3	15	17.73	3.517	3.377	0	23.447	22.511	0	5.825	5.748	5.488	38.837	38.323	36.588	7.094	7.287	7.338	47.291	48.583	48.92
PI3Kd_Y685A_roginolisib	NKDALLNWLKSKNPGEALDRAIEE	851	874	4	21	18.6	1.545	2.813	3.743	7.356	13.396	17.823	6.991	6.506	6.74	33.293	30.983	32.096	9.05	8.306	8.617	43.097	39.551	41.031
PI3Kd_Y685A_roginolisib	LNWLKSKNPGEAL	856	868	3	10	14.14	2.513	2.39	2.344	25.129	23.897	23.44	3.784	3.796	3.403	37.84	37.964	34.034	4.216	4.112	4.24	42.163	41.119	42.403
PI3Kd_Y685A_roginolisib	LNWLKSKNPGEALDRAIEE	856	874	3	16	15.5	2.759	2.728	2.575	17.244	17.048	16.092	4.767	4.802	4.384	29.796	30.011	27.397	5.371	5.294	4.866	33.566	33.087	30.415
PI3Kd_Y685A_roginolisib	NWLKSKNPGEAL	857	868	2	9	12.34	2.551	2.498	2.55	28.348	27.751	28.328	3.783	3.723	3.569	42.029	41.368	39.653	0	3.966	4.092	0	44.065	45.466
PI3Kd_Y685A_roginolisib	NWLKSKNPGEALDRA	857	871	3	12	10.8	3.037	2.929	2.945	25.307	24.41	24.538	4.965	4.876	5.027	41.379	40.629	41.889	5.929	5.253	5.534	49.407	43.774	46.113
PI3Kd_Y685A_roginolisib	NWLKSKNPGEALDRAIEE	857	874	3	15	14.28	2.891	2.555	2.649	19.275	17.034	17.662	4.739	4.693	0	31.594	31.286	0	5.135	5.387	5.554	34.23	35.914	37.026
PI3Kd_Y685A_roginolisib	DRAIEE	869	874	1	4	2.61	-0.001	-0.006	0	-0.028	-0.154	0	0.12	-0.012	-0.029	2.99	-0.311	-0.718	-0.013	0.006	0.009	-0.326	0.152	0.222
PI3Kd_Y685A_roginolisib	DRAIEEF	869	875	2	5	11.84	-0.001	-0.029	-0.001	-0.019	-0.583	-0.015	0.003	-0.01	0.008	0.058	-0.195	0.166	0.006	-0.01	0.006	0.117	-0.201	0.122
PI3Kd_Y685A_roginolisib	FTLSCAG	875	881	1	5	13.22	0.034	0.01	0	0.681	0.195	-0.003	0.036	0.011	0.017	0.724	0.227	0.341	0.013	0.029	0.009	0.262	0.576	0.174
PI3Kd_Y685A_roginolisib	FTLSCAGY	875	882	1	6	17.1	-0.035	-0.054	0	-0.59	-0.904	0	-0.002	-0.047	-0.012	-0.028	-0.783	-0.205	-0.057	0.03	-0.04	-0.951	0.499	-0.664
PI3Kd_Y685A_roginolisib	TLSCAG	876	881	1	4	4.44	0.092	0.101	-0.069	2.308	2.525	-1.716	0.024	0.118	0.045	0.588	2.944	1.128	-0.002	0.132	0.176	-0.043	3.303	4.407
PI3Kd_Y685A_roginolisib	TYVLGIGDRHSDN	886	898	2	11	10.73	0.419	0.414	0.367	3.808	3.759	3.336	0.943	0.766	0.766	8.569	6.967	6.963	2.048	1.272	1.346	18.618	11.563	12.235
PI3Kd_Y685A_roginolisib	YVLGIGDRHSDN	887	898	3	10	9.91	0.401	0.319	0.278	4.009	3.189	2.775	0.918	0.827	0.642	9.182	8.267	6.416	0	1.237	1.274	0	12.369	12.739
PI3Kd_Y685A_roginolisib	YVLGIGDRHSDNIM	887	900	3	12	14.35	0.261	0.176	0	2.175	1.465	0	0.615	0.532	0	5.126	4.435	0	0.834	0.815	0.823	6.951	6.789	6.857
PI3Kd_Y685A_roginolisib	IRESGQL	901	907	2	5	5.43	0.175	0.088	0.068	3.497	1.751	1.356	0.483	0.358	0.359	9.667	7.168	7.186	1.084	1.102	1.083	21.689	22.033	21.65
PI3Kd_Y685A_roginolisib	IRESGQLFHIDF	901	912	3	10	19.1	0.124	0.078	-0.032	1.239	0.78	-0.323	0.219	0.124	0.135	2.194	1.244	1.353	0.261	0.31	0.279	2.614	3.1	2.795
PI3Kd_Y685A_roginolisib	IRESGQLFHIDFGHF	901	915	3	13	19.25	0.351	0.291	0.404	2.701	2.242	3.107	1.1	0.97	0.771	8.46	7.461	5.927	1.246	1.231	1.302	9.585	9.471	10.018
PI3Kd_Y685A_roginolisib	IRESGQLFHIDFGHFLGNF	901	919	4	17	20.78	1.752	1.623	1.698	10.304	9.545	9.985	3.389	3.268	3.039	19.935	19.221	17.879	4.176	4.012	4.302	24.565	23.597	25.306
PI3Kd_Y685A_roginolisib	FHIDFGHF	908	915	1	6	18.5	0.332	0.261	0.253	5.527	4.348	4.225	1.091	0.905	0.696	18.191	15.077	11.604	1.068	1.168	1.108	17.795	19.459	18.47
PI3Kd_Y685A_roginolisib	FHIDFGHFLGNF	908	919	3	10	20.9	1.595	1.413	1.478	15.949	14.131	14.78	3.245	3.229	2.911	32.445	32.292	29.111	4.01	3.879	4.095	40.103	38.785	40.953
PI3Kd_Y685A_roginolisib	HIDFGHF	909	915	2	5	14.46	0.298	0.106	0.18	5.951	2.126	3.606	1.207	0.994	0.718	24.144	19.884	14.355	1.408	1.653	1.162	28.16	33.06	23.241
PI3Kd_Y685A_roginolisib	HIDFGHFLGNF	909	919	2	9	20.35	1.668	1.469	1.734	18.535	16.321	19.269	3.314	3.459	3.326	36.817	38.435	36.96	4.091	4.077	4.19	45.46	45.296	46.558
PI3Kd_Y685A_roginolisib	LGNFKTKFGINRERVPFIL	916	934	4	16	16.87	3.35	2.928	0	20.938	18.298	0	4.345	4.064	3.26	27.159	25.402	20.376	4.884	4.931	5.226	30.527	30.819	32.66
PI3Kd_Y685A_roginolisib	RERVPFIL	927	934	2	5	16.95	0.5	0.397	0.379	9.995	7.938	7.588	1.324	1.245	1.035	26.483	24.907	20.691	2.149	2.313	2.171	42.977	46.26	43.43
PI3Kd_Y685A_roginolisib	YDFVHVIQQGKTNNSEKF	936	953	3	16	13.94	4.324	4.425	3.617	27.028	27.657	22.608	4.719	4.966	3.871	29.494	31.036	24.193	5.143	5.284	0	32.143	33.026	0
PI3Kd_Y685A_roginolisib	YDFVHVIQQGKTNNSEKFERFRG	936	958	3	21	12.98	3.12	2.946	2.855	14.856	14.027	13.597	4.577	4.348	3.826	21.795	20.703	18.219	5.726	5.385	6.03	27.267	25.643	28.717
PI3Kd_Y685A_roginolisib	FVHVIQQGKTNNSEKFERF	938	956	4	17	10.35	2.311	1.98	1.792	13.592	11.648	10.543	3.667	3.331	2.827	21.568	19.596	16.631	4.348	4.069	4.474	25.574	23.933	26.318
PI3Kd_Y685A_roginolisib	FVHVIQQGKTNNSEKFERFRG	938	958	4	19	8.53	2.152	1.885	1.758	11.328	9.919	9.251	3.339	3.16	2.6	17.572	16.63	13.685	4.122	3.93	4.123	21.697	20.686	21.702
PI3Kd_Y685A_roginolisib	VHVIQQGKTNNSEKFERFRG	939	958	3	18	6.86	2.441	2.097	1.865	13.562	11.652	10.362	3.699	3.411	2.889	20.55	18.949	16.048	4.536	4.248	4.748	25.202	23.601	26.38
PI3Kd_Y685A_roginolisib	HVIQQGKTNNSEKFERFRG	940	958	4	17	6.09	2.396	2.249	2.303	14.092	13.231	13.549	3.974	3.696	3.137	23.377	21.739	18.451	4.732	4.567	4.497	27.836	26.864	26.453
PI3Kd_Y685A_roginolisib	RGYCERA	957	963	2	5	2.45	0.048	0.226	0	0.96	4.525	0	0.143	0.012	0.005	2.863	0.234	0.107	0.127	0.118	0.066	2.537	2.366	1.316
PI3Kd_Y685A_roginolisib	RAYTIL	962	967	1	4	13.16	0.085	0.049	-0.024	2.114	1.214	-0.604	0.087	-0.004	-0.005	2.182	-0.088	-0.12	-0.046	-0.036	0.003	-1.138	-0.905	0.085
PI3Kd_Y685A_roginolisib	YTILRRHGLLF	964	974	2	9	15.8	0.401	0.366	0.397	4.459	4.069	4.406	0.774	0.694	0.579	8.598	7.716	6.436	1.069	1.028	1.05	11.875	11.427	11.661
PI3Kd_Y685A_roginolisib	ILRRHGLL	966	973	2	6	7.22	0.406	0.342	0.335	6.762	5.705	5.585	0	0.662	0.598	0	11.038	9.969	0.999	0.996	0.983	16.652	16.603	16.384
PI3Kd_Y685A_roginolisib	ILRRHGLLF	966	974	2	7	13.57	0.308	0.337	0.136	4.397	4.81	1.937	0.624	0.545	0.408	8.919	7.791	5.835	0.857	0.898	1.339	12.241	12.825	19.123
PI3Kd_Y685A_roginolisib	FALMRAAGL	978	986	2	7	17.04	0.772	0.588	0.819	11.023	8.395	11.701	2.28	2.22	2.152	32.578	31.72	30.741	4.192	4.332	4.085	59.89	61.892	58.364
PI3Kd_Y685A_roginolisib	FALMRAAGLPEL	978	989	2	9	19.8	1.007	0.753	0.863	11.188	8.365	9.594	3.129	2.914	2.923	34.77	32.379	32.48	5.166	5.329	5.412	57.404	59.207	60.137
PI3Kd_Y685A_roginolisib	RAAGLPEL	982	989	2	5	13.32	0.655	0.51	0.485	13.105	10.196	9.691	2.251	2.055	1.957	45.019	41.106	39.141	3.8	3.809	3.847	76.002	76.185	76.934
PI3Kd_Y685A_roginolisib	RAAGLPELSC	982	991	2	7	13.04	1.827	1.652	1.654	26.103	23.593	23.629	3.931	3.748	3.588	56.161	53.548	51.261	5.369	5.447	5.555	76.696	77.812	79.353
PI3Kd_Y685A_roginolisib	PELSCSKDIQY	987	997	2	9	12.18	2.394	2.278	2.418	26.596	25.316	26.871	4.93	4.553	4.074	54.781	50.591	45.27	5.181	5.142	5.355	57.569	57.139	59.495
PI3Kd_Y685A_roginolisib	PELSCSKDIQYLKD	987	1000	3	12	12.53	2.052	1.867	1.608	17.099	15.561	13.4	4.31	4.198	3.542	35.919	34.982	29.517	5.507	5.605	5.828	45.891	46.71	48.565
PI3Kd_Y685A_roginolisib	SCSKDIQY	990	997	2	6	7.04	1.659	1.682	1.568	27.642	28.033	26.131	3.77	3.591	3.403	62.825	59.842	56.715	4.092	3.828	4.029	68.199	63.795	67.153
PI3Kd_Y685A_roginolisib	SCSKDIQYLKD	990	1000	3	9	8.41	1.516	1.38	1.306	16.848	15.337	14.508	3.62	3.475	3.072	40.224	38.608	34.13	4.693	4.679	4.439	52.147	51.987	49.323
PI3Kd_Y685A_roginolisib	SCSKDIQYLKDSL	990	1002	3	11	15.43	1.635	1.107	1.394	14.866	10.066	12.675	3.504	3.362	3.453	31.854	30.565	31.391	4.57	4.134	4.238	41.55	37.578	38.527
PI3Kd_Y685A_roginolisib	SKDIQYLKDSL	992	1002	2	9	12.78	0.992	0.875	1.173	11.018	9.727	13.037	2.247	2.81	2.751	24.962	31.227	30.572	3.467	3.483	3.898	38.519	38.696	43.316
PI3Kd_Y685A_roginolisib	IQYLKDSL	995	1002	2	6	13.15	0.465	0.442	0.44	7.755	7.361	7.331	0.925	0.85	0.854	15.412	14.172	14.234	1.494	1.657	1.532	24.906	27.618	25.528
PI3Kd_Y685A_roginolisib	LKDSLALGKTEEEALKHFRVKF	998	1019	5	20	16.51	2.737	2.854	0	13.685	14.269	0	3.72	3.883	3.16	18.6	19.416	15.8	5.621	5.328	5.994	28.105	26.639	29.97
PI3Kd_Y685A_roginolisib	SLALGKTEE	1001	1009	2	7	7.18	2.815	2.674	2.657	40.221	38.2	37.959	3.669	3.506	3.3	52.408	50.08	47.142	4.26	4.346	4.224	60.858	62.084	60.346
PI3Kd_Y685A_roginolisib	SLALGKTEEE	1001	1010	2	8	7.45	2.711	2.574	2.513	33.893	32.171	31.414	3.912	3.491	3.247	48.896	43.633	40.59	4.965	4.834	4.729	62.063	60.421	59.11
PI3Kd_Y685A_roginolisib	SLALGKTEEEALKHFRVKF	1001	1019	4	17	16.61	2.313	2.208	2.177	13.605	12.986	12.808	3.178	3.101	2.669	18.693	18.244	15.702	4.662	5.005	4.759	27.421	29.439	27.994
PI3Kd_Y685A_roginolisib	SLALGKTEEEALKHFRVKFNE	1001	1021	4	19	16.01	2.348	2.368	3.027	12.355	12.461	15.934	3.212	3.212	2.934	16.906	16.904	15.44	5.079	4.877	4.939	26.734	25.667	25.992
PI3Kd_Y685A_roginolisib	SLALGKTEEEALKHFRVKFNEA	1001	1022	3	20	16.1	4.565	2.256	2.382	22.823	11.282	11.909	3.238	3.322	2.965	16.191	16.608	14.825	5.119	4.911	5.034	25.594	24.553	25.169
PI3Kd_Y685A_roginolisib	SLALGKTEEEALKHFRVKFNEAL	1001	1023	4	21	17.9	2.355	2.238	2.252	11.216	10.657	10.725	3.34	3.258	3.07	15.907	15.516	14.618	6.529	5.638	5.631	31.09	26.849	26.813
PI3Kd_Y685A_roginolisib	ALGKTEEEALKHFRVKF	1003	1019	4	15	14.69	1.878	1.935	1.814	12.517	12.899	12.091	2.426	2.588	2.063	16.173	17.256	13.751	3.58	3.694	3.733	23.867	24.627	24.887
PI3Kd_Y685A_roginolisib	ALGKTEEEALKHFRVKFNE	1003	1021	4	17	14.42	1.935	2.715	1.772	11.384	15.971	10.426	2.838	2.58	2.434	16.696	15.176	14.319	4.36	4.278	3.492	25.648	25.162	20.539
PI3Kd_Y685A_roginolisib	ALGKTEEEALKHFRVKFNEA	1003	1022	4	18	14.16	1.962	1.639	1.796	10.898	9.107	9.976	2.738	2.704	2.455	15.211	15.023	13.636	4.078	3.922	4.154	22.658	21.789	23.08
PI3Kd_Y685A_roginolisib	ALGKTEEEALKHFRVKFNEAL	1003	1023	3	19	16.31	1.813	1.621	1.723	9.544	8.531	9.067	2.637	2.574	2.295	13.879	13.545	12.079	4.48	4.809	4.597	23.579	25.31	24.194
PI3Kd_Y685A_roginolisib	EALKHFRVKF	1010	1019	3	8	10.54	0.002	0.002	0.009	0.024	0.029	0.111	0.058	0.011	0.016	0.73	0.135	0.201	0.272	0.235	0.217	3.398	2.938	2.715
PI3Kd_Y685A_roginolisib	EALKHFRVKFNE	1010	1021	3	10	9.46	0.041	0.028	0.026	0.413	0.281	0.257	0.146	0.052	0.07	1.464	0.519	0.697	0.457	0.482	0.453	4.568	4.815	4.532
PI3Kd_Y685A_roginolisib	EALKHFRVKFNEA	1010	1022	2	11	9.53	1.32	0.726	1.007	12.001	6.603	9.15	2.242	2.326	2.062	20.383	21.144	18.745	3.702	3.473	3.138	33.656	31.575	28.529
PI3Kd_Y685A_roginolisib	EALKHFRVKFNEAL	1010	1023	3	12	12.38	0	0	0.037	0	0	0.309	0	0	0.162	0	0	1.351	0	0	0.943	0	0	7.858
PI3Kd_Y685A_roginolisib	ALKHFRVKFNE	1011	1021	3	9	8.82	0.092	-0.051	-0.029	1.023	-0.568	-0.319	0.117	0.056	0.115	1.305	0.62	1.276	0.238	0.25	0.343	2.639	2.782	3.813
PI3Kd_Y685A_roginolisib	ALKHFRVKFNEAL	1011	1023	3	11	11.52	0.08	0.022	0.05	0.73	0.199	0.456	0.195	0.092	0.108	1.776	0.832	0.985	0.752	0.842	0.846	6.833	7.654	7.691
PI3Kd_Y685A_roginolisib	ALRESWKTKVNWLAHNVSKDNRQ	1022	1044	5	21	12	10.665	10.218	10.375	50.785	48.659	49.404	11.912	12.272	10.966	56.726	58.437	52.217	11.614	11.766	12.426	55.304	56.03	59.17
PI3Kd_Y685A_roginolisib	LRESWKTKVNW	1023	1033	3	9	12.25	3.911	3.71	3.464	43.455	41.218	38.489	4.811	4.656	4.013	53.457	51.735	44.585	4.477	4.501	4.665	49.743	50.013	51.836
PI3Kd_Y685A_roginolisib	LRESWKTKVNWLAHNVSKDNRQ	1023	1044	5	20	11.48	9.742	9.46	9.366	48.712	47.302	46.831	10.914	10.899	9.673	54.568	54.494	48.365	10.989	10.824	11.435	54.947	54.122	57.174
PI3Kd_Y685A_roginolisib	RESWKTKVNW	1024	1033	3	8	11.85	3.81	3.624	3.527	47.622	45.306	44.087	4.602	4.491	4.09	57.53	56.133	51.127	4.472	4.418	4.494	55.902	55.225	56.181
PI3Kd_Y685A_roginolisib	RESWKTKVNWLAHNVSKDNRQ	1024	1044	4	19	10.98	10.199	9.922	9.762	53.677	52.221	51.38	11.516	11.502	10.921	60.612	60.536	57.48	11.823	11.073	11.71	62.226	58.281	61.633
PI3Kd_Y685A_roginolisib	RESWKTKVNWLAHNVSKDNRQ	1024	1044	5	19	10.98	10.024	9.585	9.931	52.76	50.45	52.271	11.61	11.553	10.649	61.106	60.805	56.049	11.805	11.159	11.594	62.13	58.734	61.023
PI3Kd_Y685A_roginolisib	SWKTKVNWLAHNVSKDNRQ	1026	1044	4	17	11.8	10.815	10.225	10.168	63.615	60.146	59.811	11.15	10.92	10.901	65.586	64.236	64.121	11.712	11.481	12.225	68.893	67.533	71.914
PI3Kd_Y685A_roginolisib	SWKTKVNWLAHNVSKDNRQ	1026	1044	5	17	11.8	10.849	10.967	9.944	63.82	64.511	58.493	11.983	11.871	11.454	70.487	69.828	67.374	11.664	11.696	11.645	68.612	68.799	68.501
PI3Kd_Y685A_roginolisib	KTKVNWLAHNVSKDNRQ	1028	1044	4	15	6	6.509	5.913	6.05	43.396	39.418	40.334	7.551	7.161	6.544	50.339	47.743	43.624	7.552	6.878	7.317	50.346	45.854	48.78
PI3Kd_WT_idelalisib	FWTKEENQS	11	19	2	7	7.92	4.638	4.5	4.403	66.25	64.284	62.899	4.61	4.578	0	65.857	65.402	0	4.219	4.484	4.584	60.27	64.059	65.492
PI3Kd_WT_idelalisib	WTKEENQS	12	19	2	6	1.85	4.177	4.175	3.946	69.614	69.583	65.765	4.172	4.303	0	69.534	71.713	0	4.076	4.163	4.272	67.925	69.379	71.198
PI3Kd_WT_idelalisib	WTKEENQSV	12	20	1	7	5.85	4.241	4.209	4.001	60.581	60.128	57.151	4.378	4.306	0	62.549	61.509	0	4.527	4.73	4.883	64.665	67.565	69.753
PI3Kd_WT_idelalisib	WTKEENQSVV	12	21	2	8	8.05	3.992	4.047	3.34	49.896	50.591	41.75	4.544	4.445	0	56.795	55.559	0	5.122	5.301	5.426	64.025	66.258	67.819
PI3Kd_WT_idelalisib	WTKEENQSVVVD	12	23	2	10	8.33	4.041	3.982	3.66	40.411	39.82	36.596	4.605	4.504	0	46.048	45.038	0	5.185	5.409	5.52	51.852	54.089	55.197
PI3Kd_WT_idelalisib	VVDFLLPTGVY	21	31	1	8	21.11	0	-0.049	0.099	0	-0.615	1.234	0.262	0.326	0	3.271	4.075	0	0	1.062	1.086	0	13.277	13.572
PI3Kd_WT_idelalisib	FLLPTGV	24	30	1	4	18.18	0.072	0.054	0.249	1.803	1.353	6.237	0.419	0.388	0	10.476	9.688	0	1.024	1.077	1.115	25.594	26.934	27.881
PI3Kd_WT_idelalisib	FLLPTGVY	24	31	1	5	19.59	0.096	0.419	0.105	1.923	8.381	2.091	0.408	0.46	0	8.165	9.193	0	1.108	1.094	1.052	22.164	21.88	21.04
PI3Kd_WT_idelalisib	YLNFPVSRNANL	31	42	2	9	15.63	2.024	2.017	1.838	22.488	22.409	20.421	3.149	3.068	0	34.989	34.089	0	3.091	3.234	3.325	34.342	35.936	36.941
PI3Kd_WT_idelalisib	LNFPVSRNANL	32	42	2	8	13.59	1.422	1.391	1.323	17.774	17.388	16.534	2.432	2.509	0	30.396	31.366	0	2.542	2.529	2.633	31.777	31.614	32.914
PI3Kd_WT_idelalisib	LNFPVSRNANLST	32	44	2	10	12.39	1.323	1.287	1.193	13.23	12.867	11.932	2.644	2.504	0	26.44	25.036	0	3.578	3.771	3.567	35.784	37.709	35.672
PI3Kd_WT_idelalisib	PVSRNANL	35	42	2	6	4.51	1.651	1.672	1.54	27.522	27.871	25.67	2.912	2.885	0	48.536	48.091	0	2.993	3.071	3.197	49.888	51.188	53.284
PI3Kd_WT_idelalisib	STIKQLL	43	49	2	5	13.27	-0.076	-0.012	-0.014	-1.526	-0.237	-0.288	-0.024	-0.013	0	-0.476	-0.256	0	0.003	0.054	0.006	0.068	1.089	0.13
PI3Kd_WT_idelalisib	STIKQLLWHRAQYEPLF	43	59	3	14	18.36	0.613	0.609	0.546	4.377	4.351	3.897	1.43	1.37	0	10.213	9.785	0	2.63	2.706	2.605	18.788	19.331	18.609
PI3Kd_WT_idelalisib	STIKQLLWHRAQYEPLFHMLSGPEA	43	67	3	21	19.44	2.804	2.869	2.639	13.351	13.66	12.568	5.194	5.013	0	24.734	23.871	0	0	6.872	7.01	0	32.725	33.381
PI3Kd_WT_idelalisib	LLWHRAQYEPLF	48	59	2	9	18.7	0.553	0.495	0	6.14	5.495	0	1.311	1.278	0	14.564	14.195	0	2.174	2.12	2.14	24.159	23.553	23.781
PI3Kd_WT_idelalisib	HMLSGPEA	60	67	2	5	6.4	1.494	1.523	1.38	29.878	30.461	27.599	2.285	2.33	0	45.691	46.608	0	0	2.834	2.987	0	56.677	59.745
PI3Kd_WT_idelalisib	TCINQTAEQQEL	71	82	2	10	10.21	1.157	1.189	1.047	11.566	11.889	10.47	2.7	2.544	0	27.004	25.438	0	2.404	3.43	3.607	24.038	34.296	36.068
PI3Kd_WT_idelalisib	TCINQTAEQQELEDEQRRLCDVQPFL	71	96	3	23	20.05	3.933	3.968	3.82	17.099	17.251	16.607	7.859	7.872	0	34.168	34.226	0	10.278	10.327	10.26	44.688	44.899	44.61
PI3Kd_WT_idelalisib	EDEQRRLCDVQPFL	83	96	2	11	17.2	0.651	0.639	1.08	5.921	5.81	9.817	2.112	2.128	0	19.196	19.344	0	3.555	3.557	3.529	32.321	32.337	32.081
PI3Kd_WT_idelalisib	EQRRLCDVQPFL	85	96	2	9	16.52	0.456	0.463	0.581	5.063	5.147	6.454	1.557	1.475	0	17.296	16.391	0	0	2.508	2.521	0	27.866	28.015
PI3Kd_WT_idelalisib	QRRLCDVQPFLPVLRLV	86	102	3	13	9.83	0.277	0.252	0.323	2.133	1.942	2.483	1.155	1.119	0	8.885	8.609	0	1.941	2.145	2.152	14.935	16.502	16.555
PI3Kd_WT_idelalisib	RRLCDVQPFLPVLRL	87	101	3	11	20.63	0.166	0.203	0.293	1.513	1.844	2.665	0.194	2.141	0	1.768	19.462	0	1.798	1.763	1.755	16.348	16.026	15.958
PI3Kd_WT_idelalisib	VQPFLPVLRL	92	101	2	6	20.96	0.012	-0.088	0	0.205	-1.467	0	-0.196	0.086	0	-3.265	1.438	0	0.74	0.652	0.225	12.339	10.862	3.754
PI3Kd_WT_idelalisib	RLVAREGDRVKKLINSQISLL	100	120	3	19	15.26	7.674	7.131	7.223	40.391	37.532	38.015	8.503	8.973	0	44.75	47.229	0	8.891	9.153	9.469	46.794	48.172	49.837
PI3Kd_WT_idelalisib	VAREGDRVKKLINS	102	115	2	12	6.04	7.107	7.065	6.739	59.228	58.879	56.157	7.48	7.399	0	62.333	61.657	0	7.406	7.345	7.452	61.715	61.21	62.097
PI3Kd_WT_idelalisib	VAREGDRVKKLINSQ	102	116	2	13	6.59	7.226	6.82	7.068	55.588	52.46	54.371	8.209	7.533	0	63.147	57.947	0	8.529	7.789	7.965	65.605	59.918	61.272
PI3Kd_WT_idelalisib	VAREGDRVKKLINSQISL	102	119	3	16	12.72	6.323	6.695	6.172	39.518	41.847	38.577	7.345	7.383	0	45.906	46.146	0	8.098	7.405	8.047	50.612	46.281	50.293
PI3Kd_WT_idelalisib	VAREGDRVKKLINSQISLL	102	120	2	17	15.69	6.621	6.395	6.507	38.945	37.619	38.279	7.05	7.687	0	41.473	45.22	0	8.33	7.641	7.592	48.998	44.949	44.662
PI3Kd_WT_idelalisib	LIGKGLHE	120	127	2	6	5.27	0.68	0.619	0.506	11.336	10.315	8.433	1.13	1.031	0	18.829	17.177	0	0	2.389	2.379	0	39.81	39.651
PI3Kd_WT_idelalisib	LIGKGLHEFDSL	120	131	2	10	15.17	0.864	0.871	0.742	8.636	8.712	7.423	2.551	2.382	0	25.511	23.82	0	2.885	3.102	3.226	28.853	31.022	32.262
PI3Kd_WT_idelalisib	LIGKGLHEFDSLCDPEVND	120	138	3	16	17	1.802	2.04	1.844	11.26	12.747	11.527	3.507	3.679	0	21.918	22.997	0	4.906	5.497	5.015	30.665	34.358	31.342
PI3Kd_WT_idelalisib	LIGKGLHEFDSLCDPEVNDF	120	139	3	17	19.29	1.964	1.929	1.787	11.552	11.347	10.51	3.566	3.419	0	20.976	20.111	0	4.507	4.742	4.949	26.514	27.893	29.112
PI3Kd_WT_idelalisib	IGKGLHE	121	127	1	5	2.42	0.693	0.646	0.468	13.865	12.916	9.37	1.106	0.966	0	22.119	19.314	0	2.08	2.264	2.358	41.607	45.284	47.153
PI3Kd_WT_idelalisib	IGKGLHEF	121	128	2	6	9.35	0.192	0.186	0.152	3.203	3.1	2.533	0.749	0.705	0	12.487	11.753	0	0	1.204	1.356	0	20.071	22.595
PI3Kd_WT_idelalisib	IGKGLHEFDSL	121	131	2	9	13.9	0.738	0.765	0.736	8.195	8.497	8.181	2.341	0	0	26.015	0	0	2.694	2.635	2.773	29.934	29.276	30.813
PI3Kd_WT_idelalisib	IGKGLHEFDSLCDPEVND	121	138	3	15	16.05	2.01	1.854	1.861	13.398	12.362	12.409	3.628	3.712	0	24.189	24.746	0	4.568	4.403	4.695	30.454	29.357	31.302
PI3Kd_WT_idelalisib	GKGLHE	122	127	1	4	2.43	0.549	0.381	0.32	13.718	9.52	8.008	0.769	0.803	0	19.219	20.078	0	1.738	1.881	2.088	43.441	47.023	52.203
PI3Kd_WT_idelalisib	FDSLCDPEVNDF	128	139	1	9	18.84	0.865	0.861	0.712	9.61	9.565	7.907	1.5	1.478	0	16.667	16.426	0	2.346	1.948	2.336	26.063	21.648	25.951
PI3Kd_WT_idelalisib	CDPEVND	132	138	1	4	3.32	0.155	0.095	0.085	3.882	2.386	2.122	0.268	0.257	0	6.704	6.434	0	1.162	1.261	1.2	29.061	31.526	30.004
PI3Kd_WT_idelalisib	CDPEVNDF	132	139	1	5	12.52	0.155	0.127	0	3.109	2.54	0	0.258	0.235	0	5.167	4.705	0	1.019	1.11	1.027	20.377	22.193	20.532
PI3Kd_WT_idelalisib	PEVNDF	134	139	1	4	11.67	0.106	0.099	-0.046	2.656	2.465	-1.159	0.092	0.063	0	2.306	1.568	0	0.302	0.477	0.396	7.549	11.923	9.892
PI3Kd_WT_idelalisib	FRAKMCQF	139	146	2	6	12.21	0.073	0.074	0.062	1.224	1.237	1.037	0.596	0.576	0	9.939	9.593	0	1.611	1.565	1.544	26.852	26.082	25.726
PI3Kd_WT_idelalisib	FCEEAAARRQQLGWEAW	146	162	3	15	18.19	1.464	1.443	1.279	9.763	9.621	8.524	3.477	3.308	0	23.182	22.053	0	6.388	6.728	6.572	42.589	44.855	43.816
PI3Kd_WT_idelalisib	CEEAAARRQQLGWEAW	147	162	3	14	17.4	1.379	1.398	1.239	9.847	9.984	8.852	3.301	3.189	0	23.578	22.781	0	0	6.266	6.195	0	44.759	44.248
PI3Kd_WT_idelalisib	AAARRQQLGWEA	150	161	2	10	10.2	1.391	1.416	1.245	13.908	14.163	12.455	3.183	3.162	0	31.827	31.622	0	6.287	5.752	5.717	62.868	57.521	57.167
PI3Kd_WT_idelalisib	AAARRQQLGWEAW	150	162	2	11	17.58	1.29	1.296	1.169	11.727	11.786	10.63	2.93	2.777	0	26.64	25.243	0	4.742	5.04	5.077	43.106	45.816	46.151
PI3Kd_WT_idelalisib	AARRQQLGWEAW	151	162	2	10	17.67	1.159	1.259	1.149	11.59	12.59	11.491	2.812	2.657	0	28.116	26.571	0	4.211	4.42	4.357	42.107	44.201	43.573
PI3Kd_WT_idelalisib	ARRQQLGWEAW	152	162	2	9	17.68	1.069	1.204	1.301	11.882	13.377	14.452	2.709	2.473	0	30.095	27.483	0	0	4.11	4.255	0	45.665	47.281
PI3Kd_WT_idelalisib	WLQYSFPLQLEPSAQTWGPGTLRLPNRALL	162	191	3	24	20.95	10.175	9.485	9.903	42.394	39.523	41.262	11.448	11.766	0	47.701	49.025	0	13.652	13.898	14.114	56.884	57.907	58.807
PI3Kd_WT_idelalisib	LQYSFPLQLEPSAQTWGPGTLRLPNRALL	163	191	3	23	20.63	10.429	10.312	10.241	45.341	44.835	44.527	12.141	12.235	0	52.786	53.193	0	14.196	14.169	14.363	61.721	61.603	62.446
PI3Kd_WT_idelalisib	QYSFPLQLEPSAQTWGPGTLRLPNRALL	164	191	3	22	20.56	10.498	10.396	10.417	47.718	47.253	47.348	12.196	12.178	0	55.435	55.355	0	0	14.177	14.553	0	64.439	66.148
PI3Kd_WT_idelalisib	PLQLEPSAQTWGPGTLRLPNRALL	168	191	3	19	19.42	10.751	10.817	10.416	56.587	56.933	54.82	12.093	12.233	0	63.65	64.382	0	0	13.375	13.93	0	70.395	73.314
PI3Kd_WT_idelalisib	QTWGPGTLRLPNRALL	176	191	3	12	17.82	7.524	7.506	7.332	62.703	62.549	61.099	8.318	8.214	0	69.315	68.454	0	9.076	9.029	9.399	75.637	75.243	78.324
PI3Kd_WT_idelalisib	WGPGTLRLPNRALL	178	191	3	10	17.91	5.509	5.43	5.268	55.093	54.301	52.675	6.282	6.162	0	62.818	61.621	0	0	7.096	7.255	0	70.955	72.554
PI3Kd_WT_idelalisib	LRLPNRALL	183	191	2	6	13.54	2.95	2.985	2.754	49.165	49.752	45.908	3.852	3.522	0	64.198	58.696	0	4.53	4.527	4.952	75.507	75.445	82.537
PI3Kd_WT_idelalisib	VNVKFEGSE	192	200	2	7	7.94	1.888	1.912	1.819	26.973	27.308	25.983	2.445	2.376	0	34.924	33.941	0	2.801	2.909	2.98	40.008	41.555	42.577
PI3Kd_WT_idelalisib	VNVKFEGSEE	192	201	2	8	8.28	2.169	2.265	2.169	27.111	28.307	27.111	2.942	2.942	0	36.771	36.774	0	3.244	3.459	3.448	40.552	43.239	43.095
PI3Kd_WT_idelalisib	VNVKFEGSEES	192	202	2	9	7.77	2.984	3.007	2.789	33.152	33.408	30.989	3.789	3.722	0	42.102	41.356	0	4.044	4.379	4.443	44.932	48.659	49.366
PI3Kd_WT_idelalisib	VNVKFEGSEESF	192	203	2	10	13.52	3.104	3.151	3.134	31.041	31.508	31.336	3.925	3.734	0	39.251	37.341	0	4.177	4.542	4.584	41.773	45.424	45.838
PI3Kd_WT_idelalisib	VNVKFEGSEESFT	192	204	2	11	12.71	3.704	3.703	3.335	33.673	33.666	30.314	4.563	4.415	0	41.482	40.135	0	4.736	5.005	5.159	43.058	45.5	46.901
PI3Kd_WT_idelalisib	ESFTFQVSTKDVPLAL	201	216	2	13	19.84	2.859	2.159	1.967	21.994	16.609	15.129	3.808	3.833	0	29.29	29.482	0	5.192	4.622	4.619	39.941	35.553	35.529
PI3Kd_WT_idelalisib	FTFQVSTKDVPLAL	203	216	2	11	19.61	1.362	1.361	1.244	12.38	12.37	11.305	2.967	2.85	0	26.973	25.905	0	3.572	3.686	3.736	32.475	33.509	33.962
PI3Kd_WT_idelalisib	TFQVSTKDVPLAL	204	216	2	10	17.14	1.253	1.235	1.129	12.526	12.352	11.286	2.913	2.762	0	29.128	27.615	0	3.488	3.586	3.669	34.884	35.862	36.694
PI3Kd_WT_idelalisib	FQVSTKDVPLAL	205	216	2	9	16.83	0.53	0.382	0.461	5.89	4.242	5.127	2.12	2.003	0	23.551	22.253	0	2.731	2.838	2.839	30.34	31.533	31.547
PI3Kd_WT_idelalisib	FQVSTKDVPLALM	205	217	2	10	18.58	0.517	0.595	0	5.168	5.946	0	2.045	1.937	0	20.451	19.373	0	0	2.618	2.921	0	26.183	29.214
PI3Kd_WT_idelalisib	QVSTKDVPLAL	206	216	2	8	14.06	0.623	0.55	0.548	7.782	6.872	6.845	2.072	2.11	0	25.904	26.373	0	0	2.907	2.931	0	36.333	36.64
PI3Kd_WT_idelalisib	VSTKDVPLAL	207	216	2	7	13.9	0.399	0.383	0.27	5.694	5.469	3.862	1.451	1.37	0	20.736	19.574	0	2.488	2.149	2.224	35.547	30.697	31.775
PI3Kd_WT_idelalisib	ACALRKKATV	218	227	2	8	1.75	1.482	1.904	0.776	18.531	23.796	9.706	3.163	3.152	0	39.534	39.396	0	4.06	4.13	3.997	50.752	51.624	49.963
PI3Kd_WT_idelalisib	CALRKKATV	219	227	2	7	0.88	1.705	1.677	1.34	24.359	23.958	19.141	3.056	0	0	43.661	0	0	3.85	4.073	4.07	55.005	58.179	58.144
PI3Kd_WT_idelalisib	CALRKKATVFRQPLVEQPED	219	238	3	16	8.43	6.363	6.52	6.168	39.771	40.75	38.548	8.186	8.154	0	51.165	50.96	0	8.893	9.041	9.277	55.584	56.506	57.982
PI3Kd_WT_idelalisib	ALRKKATVFRQPLVEQPED	220	238	3	15	8.09	6.366	6.299	6.493	42.442	41.991	43.287	8.161	7.968	0	54.41	53.118	0	8.5	8.776	8.994	56.666	58.509	59.958
PI3Kd_WT_idelalisib	LRKKATVFRQPLVEQPED	221	238	3	14	8.26	6.071	6.174	6.044	43.367	44.097	43.168	7.683	7.788	0	54.875	55.626	0	8.158	8.197	8.536	58.275	58.552	60.972
PI3Kd_WT_idelalisib	RKKATVFRQPLVEQPED	222	238	3	13	7.68	6.084	6.05	5.976	46.803	46.542	45.972	7.661	7.714	0	58.928	59.34	0	8.064	7.925	8.333	62.028	60.964	64.098
PI3Kd_WT_idelalisib	FRQPLVEQPED	228	238	2	7	9.34	3.722	3.728	3.626	53.165	53.252	51.794	4.629	4.544	0	66.13	64.92	0	5.069	5.195	5.311	72.412	74.21	75.866
PI3Kd_WT_idelalisib	YTLQVNGRHEYL	239	250	2	10	12.58	0.355	0.309	0.213	3.549	3.091	2.127	0.366	0.329	0	3.661	3.288	0	0.343	0.41	0.415	3.429	4.102	4.148
PI3Kd_WT_idelalisib	YTLQVNGRHEYLYGSY	239	254	3	14	14.1	0.996	0.84	0.875	7.117	6.002	6.247	1.139	1.042	0	8.136	7.446	0	1.485	1.63	1.656	10.607	11.642	11.827
PI3Kd_WT_idelalisib	YTLQVNGRHEYLYGSYPLCQ	239	258	3	17	16.2	1.105	1.009	0.944	6.498	5.937	5.555	1.192	1.159	0	7.009	6.815	0	1.612	1.668	1.713	9.48	9.815	10.079
PI3Kd_WT_idelalisib	YTLQVNGRHEYLYGSYPLCQF	239	259	2	18	19.94	1.06	0.9	0.945	5.889	4.999	5.249	1.139	1.251	0	6.33	6.95	0	1.423	1.588	1.635	7.906	8.82	9.086
PI3Kd_WT_idelalisib	LQVNGRHEYL	241	250	2	8	12.69	0.403	0.166	0.205	5.042	2.077	2.563	0.433	0.265	0	5.415	3.313	0	0.324	0.459	0.427	4.044	5.738	5.336
PI3Kd_WT_idelalisib	QVNGRHEYL	242	250	2	7	7.34	0.632	0.41	0.262	9.026	5.858	3.741	0.501	0.737	0	7.158	10.523	0	0.329	0.322	0.37	4.696	4.6	5.285
PI3Kd_WT_idelalisib	QVNGRHEYLYGSYPLCQF	242	259	3	15	19.07	0.727	0.717	0.671	4.844	4.778	4.472	0.853	0.86	0	5.689	5.734	0	0	1.29	1.394	0	8.603	9.295
PI3Kd_WT_idelalisib	YGSYPLCQ	251	258	1	5	13.44	0.565	0	0.57	11.31	0	11.396	0.679	0.482	0	13.579	9.646	0	0.434	0.46	0.547	8.682	9.209	10.94
PI3Kd_WT_idelalisib	YGSYPLCQF	251	259	2	6	20.27	0.456	0.29	0.321	7.595	4.826	5.355	0.346	0.289	0	5.762	4.824	0	0.437	0	0.334	7.29	0	5.564
PI3Kd_WT_idelalisib	FQYICS	259	264	1	4	13.32	0.737	0.755	0.749	18.433	18.886	18.721	0.901	0.898	0	22.524	22.459	0	0.961	0.983	0.981	24.034	24.587	24.532
PI3Kd_WT_idelalisib	FQYICSCL	259	266	1	6	20.69	0	0.094	0	0	1.575	0	0.249	0	0	4.156	0	0	0	0.3	0.313	0	4.998	5.21
PI3Kd_WT_idelalisib	QYICSCL	260	266	1	5	17.41	0.025	0.029	0.057	0.507	0.57	1.134	0.042	0.024	0	0.847	0.489	0	0.089	0.105	0.099	1.775	2.098	1.987
PI3Kd_WT_idelalisib	CLHSGLTPHL	265	274	2	7	10.56	0.933	0.931	0	13.33	13.294	0	1.141	1.152	0	16.293	16.461	0	1.47	2.181	1.604	20.993	31.158	22.917
PI3Kd_WT_idelalisib	CLHSGLTPHLTM	265	276	2	9	12.73	0.993	1.018	1.252	11.03	11.308	13.908	2.682	2.606	0	29.805	28.959	0	3.437	3.122	3.709	38.192	34.687	41.206
PI3Kd_WT_idelalisib	CLHSGLTPHLTMVHSSSIL	265	283	3	16	14.19	0.664	0.624	0.619	4.149	3.901	3.866	0.649	0.611	0	4.056	3.82	0	0.691	0.796	0.734	4.318	4.975	4.586
PI3Kd_WT_idelalisib	HSGLTPHL	267	274	2	5	8.4	0.868	0.846	0	17.354	16.921	0	1.061	1.062	0	21.223	21.233	0	1.318	1.401	1.396	26.365	28.026	27.923
PI3Kd_WT_idelalisib	HSGLTPHLTMVHSSSIL	267	283	3	14	13.26	0.576	0.598	0.563	4.111	4.272	4.022	0.694	0.704	0	4.954	5.028	0	1.341	0.813	0.799	9.578	5.805	5.71
PI3Kd_WT_idelalisib	HSGLTPHLTMVHSSSILA	267	284	3	15	12.55	0.51	0.624	0.598	3.401	4.158	3.985	0.675	0.741	0	4.502	4.937	0	0.932	1.097	1.022	6.216	7.316	6.811
PI3Kd_WT_idelalisib	TMVHSSSIL	275	283	2	7	11.22	0.083	0.02	-0.009	1.193	0.284	-0.128	0.111	0.079	0	1.581	1.126	0	0.197	0.334	0.303	2.815	4.766	4.333
PI3Kd_WT_idelalisib	VHSSSIL	277	283	1	5	8.93	0.116	0.132	0.136	2.316	2.631	2.72	0.262	0.259	0	5.236	5.177	0	0.333	0.419	0.456	6.664	8.374	9.122
PI3Kd_WT_idelalisib	RDEQSNPAPQVQKPRAKPPPIPAKKPSSVSL	286	316	5	21	6.6	13.984	13.924	13.725	66.591	66.304	65.355	14.392	14.621	0	68.535	69.622	0	13.59	13.82	14.386	64.716	65.81	68.504
PI3Kd_WT_idelalisib	PQVQKPRAKPPPIPAKKPSSVSL	294	316	4	15	6.83	12.046	11.277	11.18	80.308	75.179	74.535	12.034	12.09	0	80.226	80.598	0	11.545	11.556	11.826	76.967	77.039	78.841
PI3Kd_WT_idelalisib	WSLEQPFRIEL	317	327	2	8	21.01	0.745	0.763	0.787	9.311	9.541	9.841	1.221	1.171	0	15.268	14.634	0	2.105	1.841	1.866	26.308	23.008	23.32
PI3Kd_WT_idelalisib	IQGSKVNADE	328	337	2	8	2.02	0.848	0.809	0.747	10.604	10.117	9.336	2.257	2.302	0	28.218	28.778	0	0	3.268	3.751	0	40.855	46.885
PI3Kd_WT_idelalisib	FDYKDQLKTGERCL	426	439	3	12	12.94	1.821	2.108	2.051	15.172	17.566	17.089	3.102	3.159	0	25.847	26.328	0	3.832	4.113	3.969	31.934	34.276	33.078
PI3Kd_WT_idelalisib	YKDQLKTGERC	428	438	3	9	3.77	3.251	3.183	3.226	36.122	35.361	35.84	4.313	3.984	0	47.92	44.265	0	4.471	4.571	4.797	49.683	50.789	53.304
PI3Kd_WT_idelalisib	LNPTGTVRSNPNTDSAAAL	453	471	2	15	9.32	4.168	3.852	3.895	27.785	25.682	25.968	6.432	6.327	0	42.881	42.177	0	7.505	7.734	7.968	50.032	51.563	53.118
PI3Kd_WT_idelalisib	ICLPEVAPHPVYY	473	485	2	8	17.07	2.935	3.184	3.339	36.689	39.796	41.735	4.407	4.236	0	55.091	52.95	0	5.344	5.765	6.024	66.797	72.06	75.306
PI3Kd_WT_idelalisib	ICLPEVAPHPVYYPAL	473	488	2	10	18.9	2.892	2.727	2.741	28.915	27.272	27.406	3.937	3.722	0	39.372	37.217	0	5.04	5.406	5.271	50.401	54.059	52.71
PI3Kd_WT_idelalisib	PEVAPHPVYYPAL	476	488	2	8	15.6	0	0.942	0.805	0	11.781	10.058	2.099	0	0	26.232	0	0	0	2.366	2.305	0	29.573	28.811
PI3Kd_WT_idelalisib	EKILEL	489	494	1	4	14.67	0.041	0.045	-0.031	1.029	1.119	-0.779	0.098	0.057	0	2.453	1.437	0	0.175	0.687	0.612	4.376	17.163	15.29
PI3Kd_WT_idelalisib	EKILELGRHSE	489	499	3	9	7.81	0.32	0.274	0.151	3.56	3.043	1.678	0.724	0.713	0	8.043	7.92	0	1.531	1.493	1.512	17.011	16.592	16.795
PI3Kd_WT_idelalisib	EKILELGRHSEC	489	500	2	10	8.68	0.81	0.743	0.758	8.1	7.431	7.583	1.209	1.074	0	12.09	10.744	0	1.871	1.966	2.056	18.711	19.661	20.562
PI3Kd_WT_idelalisib	EKILELGRHSECVHVTE	489	505	2	15	9.61	2.47	2.677	2.516	16.465	17.847	16.775	3.112	3.087	0	20.75	20.581	0	0	4.245	4.4	0	28.301	29.333
PI3Kd_WT_idelalisib	EKILELGRHSECVHVTEE	489	506	2	16	9.66	2.937	2.833	2.717	18.358	17.707	16.982	3.459	3.355	0	21.617	20.972	0	0	4.366	4.712	0	27.29	29.451
PI3Kd_WT_idelalisib	EKILELGRHSECVHVTEEEQ	489	508	3	18	9.56	3.039	2.943	2.831	16.884	16.348	15.728	3.684	3.424	0	20.469	19.021	0	4.58	5.08	5.296	25.445	28.223	29.425
PI3Kd_WT_idelalisib	KILELGRHSEC	490	500	2	9	7.53	1	0.466	0.938	11.112	5.179	10.427	0.822	0.868	0	9.13	9.646	0	1.413	1.586	1.7	15.697	17.627	18.894
PI3Kd_WT_idelalisib	LGRHSECVHVTE	494	505	3	10	4.19	2.825	2.91	2.669	28.255	29.097	26.692	3.048	2.964	0	30.479	29.639	0	3.325	3.453	3.546	33.253	34.533	35.464
PI3Kd_WT_idelalisib	LGRHSECVHVTEE	494	506	3	11	4.35	3.106	3.05	2.942	28.234	27.727	26.746	3.448	3.328	0	31.344	30.25	0	3.558	3.713	3.931	32.348	33.756	35.733
PI3Kd_WT_idelalisib	LGRHSECVHVTEEEQ	494	508	3	13	4.52	3.054	3.017	2.874	23.494	23.209	22.111	3.567	3.384	0	27.438	26.032	0	4.23	4.471	4.537	32.542	34.393	34.896
PI3Kd_WT_idelalisib	GRHSECVHVTEE	495	506	3	10	3.31	3.269	3.085	3.358	32.69	30.852	33.578	3.78	3.712	0	37.796	37.122	0	3.725	3.994	4.193	37.25	39.943	41.925
PI3Kd_WT_idelalisib	CVHVTEEEQ	500	508	2	7	3.78	2.218	2.22	2.005	31.683	31.712	28.648	2.683	2.632	0	38.335	37.602	0	0	3.738	3.767	0	53.394	53.81
PI3Kd_WT_idelalisib	VHVTEE	501	506	1	4	2.22	1.899	1.968	1.763	47.473	49.211	44.087	2.242	2.324	0	56.058	58.096	0	2.656	2.715	2.761	66.393	67.864	69.028
PI3Kd_WT_idelalisib	VHVTEEEQ	501	508	1	6	2.54	1.932	1.948	1.765	32.206	32.47	29.421	2.378	2.345	0	39.632	39.083	0	3.313	3.48	3.433	55.224	58	57.215
PI3Kd_WT_idelalisib	VHVTEEEQLQL	501	511	2	9	13.45	1.249	1.23	1.022	13.878	13.662	11.351	1.732	1.614	0	19.249	17.937	0	3.805	4.119	4.242	42.279	45.771	47.135
PI3Kd_WT_idelalisib	REILERRGSGEL	512	523	2	10	7.32	2.799	2.727	2.621	27.993	27.272	26.21	3.217	3.055	0	32.175	30.546	0	2.896	3.094	3.262	28.964	30.941	32.618
PI3Kd_WT_idelalisib	YEHEKDLVWKLRHEVQEHFPEALARL	524	549	4	23	18.97	1.404	1.113	0.593	6.105	4.839	2.577	1.472	1.382	0	6.399	6.01	0	2.144	2.653	2.414	9.322	11.537	10.496
PI3Kd_WT_idelalisib	HEKDLVWKLRHEVQEHFPEAL	526	546	4	18	17.61	0.47	0.463	0.473	2.611	2.572	2.626	1.379	1.392	0	7.661	7.736	0	1.867	2.336	2.078	10.373	12.977	11.546
PI3Kd_WT_idelalisib	LLVTKWNKHEDVAQM	550	564	2	13	11.35	0.118	0.117	0.023	0.904	0.899	0.174	0.463	0.943	0	3.56	7.256	0	0	0.657	0.67	0	5.055	5.154
PI3Kd_WT_idelalisib	LLVTKWNKHEDVAQML	550	565	3	14	15.35	0.126	0.176	-0.006	0.898	1.258	-0.042	0.319	0.172	0	2.278	1.23	0	0	0.335	0.447	0	2.396	3.192
PI3Kd_WT_idelalisib	CSWPEL	569	574	1	3	19.09	-0.003	0.042	0.03	-0.085	1.411	1.014	0.484	0.495	0	16.119	16.506	0	1.005	1.159	1.179	33.494	38.624	39.283
PI3Kd_WT_idelalisib	LDFSFPDCHVGSF	583	595	2	10	20.72	0.697	0.62	0.615	6.971	6.199	6.147	1.722	1.66	0	17.224	16.603	0	3.202	2.658	3.201	32.02	26.577	32.014
PI3Kd_WT_idelalisib	FSFPDCHVGSF	585	595	2	8	19.41	0.439	0.476	0.269	5.49	5.954	3.364	0.765	0.776	0	9.568	9.701	0	1.853	2.013	1.97	23.158	25.162	24.62
PI3Kd_WT_idelalisib	AIKSLRKLTDDEL	596	608	2	11	11.26	0.827	0.837	0.839	7.515	7.608	7.623	1.361	1.309	0	12.373	11.896	0	1.898	1.715	1.836	17.252	15.588	16.695
PI3Kd_WT_idelalisib	FQYLLQ	609	614	1	4	16.86	0.035	0.054	-0.028	0.866	1.356	-0.702	-0.001	0.035	0	-0.013	0.882	0	0	0.076	0.062	0	1.895	1.539
PI3Kd_WT_idelalisib	LVQVLKYESYL	615	625	2	9	18.4	1.127	1.137	1.024	12.524	12.629	11.376	1.918	1.904	0	21.313	21.158	0	2.27	2.525	2.492	25.218	28.059	27.692
PI3Kd_WT_idelalisib	VQVLKYESY	616	624	2	7	11.98	1.134	1.029	0.997	16.204	14.706	14.238	1.682	1.756	0	24.024	25.084	0	0	1.744	1.734	0	24.913	24.77
PI3Kd_WT_idelalisib	VQVLKYESYL	616	625	2	8	16.62	1.068	1.1	0.946	13.348	13.746	11.828	1.836	1.819	0	22.945	22.738	0	2.377	2.492	2.457	29.718	31.146	30.717
PI3Kd_WT_idelalisib	VQVLKYESYLDC	616	627	2	10	16.74	0.836	0	0.908	8.364	0	9.084	1.788	1.737	0	17.884	17.372	0	0	3.022	3.009	0	30.22	30.089
PI3Kd_WT_idelalisib	ELTKFLL	628	634	2	5	18.5	0	0	0	0	0	0	0	0	0	0	0	0	0	0	0	0	0	0
PI3Kd_WT_idelalisib	ELTKFLLDRALANRKIGHFL	628	647	3	18	16.98	0.208	0.203	0.14	1.155	1.125	0.776	0.129	0.2	0	0.714	1.112	0	0.225	0.154	0.224	1.25	0.854	1.243
PI3Kd_WT_idelalisib	LTKFLLDRALANRKIGHF	629	646	3	16	13.71	0.252	0.25	0.114	1.573	1.562	0.71	0.121	0.104	0	0.753	0.652	0	0.467	0.277	0.205	2.919	1.732	1.282
PI3Kd_WT_idelalisib	TKFLLD	630	635	1	4	13.76	0.066	0.008	-0.017	1.641	0.191	-0.424	0.034	0.024	0	0.847	0.601	0	-0.039	0.002	-0.035	-0.969	0.051	-0.881
PI3Kd_WT_idelalisib	TKFLLDRALANRKIGHF	630	646	3	15	13.14	0.165	0.08	0.099	1.103	0.535	0.659	0.245	0.274	0	1.636	1.826	0	0.345	0	0.39	2.301	0	2.599
PI3Kd_WT_idelalisib	TKFLLDRALANRKIGHFL	630	647	3	16	15.42	0.54	0	0.105	3.373	0	0.657	0.112	0.064	0	0.7	0.399	0	0.115	0.367	0.486	0.717	2.294	3.036
PI3Kd_WT_idelalisib	LLDRALANRKIGHF	633	646	3	12	10.44	0.175	0.044	0.076	1.462	0.363	0.63	0.206	0.203	0	1.715	1.693	0	0.415	0	0.451	3.462	0	3.76
PI3Kd_WT_idelalisib	LLDRALANRKIGHFL	633	647	2	13	13.01	0.089	0.019	0.092	0.683	0.148	0.704	0.086	0.086	0	0.662	0.663	0	0.167	0.175	0.241	1.288	1.343	1.851
PI3Kd_WT_idelalisib	LLDRALANRKIGHFLFWHL	633	651	4	17	18.75	0.058	0.07	0.073	0.343	0.413	0.428	0	0.07	0	0	0.413	0	0.085	0	0	0.501	0	0
PI3Kd_WT_idelalisib	DRALANRKIGHF	635	646	3	10	7.15	0.096	-0.114	-0.059	0.955	-1.135	-0.593	0.339	0.209	0	3.393	2.092	0	0.377	0.514	0.472	3.767	5.14	4.721
PI3Kd_WT_idelalisib	RALANRKIGHF	636	646	2	9	5.67	0.086	0.015	0.105	0.958	0.168	1.164	0.07	0.235	0	0.778	2.616	0	0.38	0.098	0.165	4.22	1.084	1.832
PI3Kd_WT_idelalisib	LFWHLRSEM	647	655	2	7	17.01	0.217	0	0.025	3.097	0	0.357	0	0.006	0	0	0.093	0	0.039	0.149	0.076	0.556	2.123	1.091
PI3Kd_WT_idelalisib	FWHLRSEM	648	655	2	6	14.83	-0.151	-0.158	-0.222	-2.512	-2.64	-3.697	-0.13	-0.188	0	-2.17	-3.136	0	0.1	-0.175	-0.126	1.667	-2.924	-2.097
PI3Kd_WT_idelalisib	RSEMHVPSVA	652	661	2	7	8.26	1.146	1.099	1.024	16.365	15.697	14.625	1.138	1.051	0	16.254	15.012	0	1.153	1.315	1.708	16.469	18.787	24.401
PI3Kd_WT_idelalisib	HVPSVA	656	661	1	3	3.15	0.791	0.82	0.847	26.382	27.328	28.238	0.825	0.87	0	27.486	29.01	0	1.072	1.127	1.101	35.719	37.567	36.712
PI3Kd_WT_idelalisib	LRFGLIL	662	668	2	5	20.81	0.033	-0.07	-0.057	0.655	-1.405	-1.144	0.034	0.021	0	0.675	0.418	0	0.005	0	0.004	0.104	0	0.08
PI3Kd_WT_idelalisib	LRFGLILE	662	669	2	6	19.96	0.057	0.008	-0.005	0.956	0.134	-0.083	0.025	-0.058	0	0.411	-0.975	0	-0.039	0.063	0.013	-0.655	1.054	0.209
PI3Kd_WT_idelalisib	LRFGLILEA	662	670	2	7	20.34	0.073	0.055	-0.015	1.047	0.791	-0.213	0.029	0.04	0	0.411	0.565	0	0.026	0.112	0.034	0.37	1.593	0.484
PI3Kd_WT_idelalisib	RFGLIL	663	668	1	4	19.79	0.02	0.04	-0.031	0.502	0.993	-0.776	-0.018	-0.009	0	-0.453	-0.236	0	0.13	-0.011	-0.028	3.247	-0.28	-0.698
PI3Kd_WT_idelalisib	EAYCRGSTHHMKVL	669	682	3	12	6.03	0.033	0	0.189	0.274	0	1.573	0	0.349	0	0	2.911	0	0.855	0.898	0.978	7.121	7.485	8.152
PI3Kd_WT_idelalisib	YCRGSTHHMKVLM	671	683	3	11	6.5	0.268	0.199	0.121	2.435	1.806	1.103	0.428	0.378	0	3.888	3.433	0	0.87	1.113	0.921	7.912	10.12	8.368
PI3Kd_WT_idelalisib	MKQGEALSKL	683	692	2	8	9.19	0.278	0.118	0.804	3.472	1.478	10.054	0.433	0.233	0	5.409	2.907	0	0.302	0.529	0.549	3.779	6.614	6.868
PI3Kd_WT_idelalisib	KQGEALSKL	684	692	2	7	7.58	0.091	0.024	-0.025	1.307	0.347	-0.357	0.065	0.102	0	0.931	1.458	0	0.275	0.34	0.246	3.929	4.862	3.516
PI3Kd_WT_idelalisib	KQGEALSKLKALND	684	697	3	12	8.77	0.227	0.146	0.271	1.893	1.221	2.261	0.09	0.136	0	0.751	1.135	0	0.357	0.407	0.246	2.975	3.389	2.047
PI3Kd_WT_idelalisib	LSKLKALND	689	697	2	7	6.54	0.177	0.123	0.186	2.534	1.757	2.651	0.117	0.117	0	1.667	1.668	0	0.133	0.2	0.101	1.894	2.857	1.448
PI3Kd_WT_idelalisib	SKLKALND	690	697	2	6	3.65	0.147	0.092	0.046	2.456	1.537	0.761	0.098	0.098	0	1.636	1.634	0	0.093	0.144	0.094	1.555	2.396	1.559
PI3Kd_WT_idelalisib	SKLKALNDF	690	698	2	7	11.81	0.172	-0.013	0.147	2.463	-0.191	2.106	0.085	0.078	0	1.214	1.113	0	0.053	0.149	0.071	0.761	2.126	1.018
PI3Kd_WT_idelalisib	FVKLSSQKTPKPQTKE	698	713	2	12	4.11	3.283	3.214	3.129	27.36	26.78	26.078	5.28	5.342	0	44.004	44.519	0	5.837	5.867	6.091	48.64	48.889	50.756
PI3Kd_WT_idelalisib	FVKLSSQKTPKPQTKE	698	713	3	12	4.11	3.191	3.229	3.142	26.594	26.908	26.184	5.466	5.285	0	45.549	44.042	0	5.756	5.844	6.156	47.969	48.701	51.298
PI3Kd_WT_idelalisib	FVKLSSQKTPKPQTKELMHL	698	717	4	16	9.92	2.03	1.943	1.92	12.687	12.144	11.999	3.066	3.252	0	19.16	20.325	0	3.71	3.677	3.812	23.185	22.981	23.823
PI3Kd_WT_idelalisib	FVKLSSQKTPKPQTKELMHLCM	698	719	3	18	12.79	1.78	1.628	1.592	9.89	9.042	8.844	2.556	2.555	0	14.198	14.193	0	2.975	3.346	3.426	16.527	18.588	19.032
PI3Kd_WT_idelalisib	VKLSSQKTPKPQTKE	699	713	3	11	1.8	3.482	3.647	3.262	31.652	33.156	29.658	5.797	5.672	0	52.701	51.566	0	6.226	6.382	6.562	56.597	58.022	59.651
PI3Kd_WT_idelalisib	VKLSSQKTPKPQTKE	699	713	4	11	1.8	3.529	3.604	3.44	32.081	32.767	31.273	5.732	5.722	0	52.111	52.018	0	0	6.408	6.38	0	58.253	57.998
PI3Kd_WT_idelalisib	RQEAYL	720	725	1	4	9.21	1.401	1.398	1.349	35.015	34.955	33.717	1.571	1.53	0	39.283	38.239	0	2.348	2.436	2.401	58.71	60.905	60.036
PI3Kd_WT_idelalisib	RQEAYLEA	720	727	2	6	8.96	1.516	1.53	1.326	25.263	25.501	22.105	2.705	2.692	0	45.087	44.862	0	0	3.738	3.81	0	62.306	63.503
PI3Kd_WT_idelalisib	EALSHLQSPLDPSTL	726	740	2	11	15.63	0.307	0.252	0.213	2.789	2.292	1.933	0.93	0.912	0	8.452	8.289	0	2.434	2.53	2.502	22.131	23.002	22.744
PI3Kd_WT_idelalisib	EALSHLQSPLDPSTLL	726	741	2	12	18.61	0.258	0.219	0.218	2.148	1.827	1.815	0.884	0.846	0	7.363	7.046	0	2.418	2.538	2.459	20.146	21.151	20.496
PI3Kd_WT_idelalisib	LSHLQSPLDPSTL	728	740	2	9	14.61	0.285	0.242	0.209	3.165	2.684	2.327	0.936	0.949	0	10.395	10.544	0	2.456	2.533	2.519	27.294	28.148	27.988
PI3Kd_WT_idelalisib	LSHLQSPLDPSTLL	728	741	2	10	18.16	0.266	0.22	0.198	2.657	2.205	1.983	0.915	1.041	0	9.146	10.412	0	2.446	2.53	2.514	24.457	25.301	25.136
PI3Kd_WT_idelalisib	LAEVCVE	741	747	1	5	9.97	1.109	1.151	1.065	22.187	23.014	21.301	1.765	1.762	0	35.297	35.237	0	1.874	2.012	1.848	37.479	40.231	36.969
PI3Kd_WT_idelalisib	VCVEQCTF	744	751	1	6	15.13	1.249	1.38	1.104	20.809	23.003	18.403	2.427	2.273	0	40.443	37.88	0	2.86	2.983	3.085	47.667	49.711	51.42
PI3Kd_WT_idelalisib	MDSKMKPLW	752	760	2	6	15.04	1.06	1.05	0.949	17.661	17.502	15.822	1.077	0.978	0	17.956	16.308	0	1.098	1.292	1.23	18.296	21.536	20.505
PI3Kd_WT_idelalisib	MDSKMKPLWIM	752	762	2	8	19.31	0.832	0.778	0.731	10.398	9.73	9.132	0.849	0.862	0	10.615	10.772	0	0.908	0.994	0.983	11.35	12.429	12.283
PI3Kd_WT_idelalisib	DSKMKPLW	753	760	2	5	14.85	0.909	0.87	0.786	18.177	17.394	15.726	0.888	0.818	0	17.759	16.355	0	0	1.101	1.107	0	22.012	22.132
PI3Kd_WT_idelalisib	DSKMKPLWIM	753	762	3	7	19.37	0.703	0.738	0	10.037	10.542	0	0.787	0.717	0	11.241	10.242	0	0.88	0.894	0.865	12.572	12.765	12.355
PI3Kd_WT_idelalisib	IMYSNE	761	766	1	4	6.46	1.391	1.428	1.43	34.765	35.699	35.753	1.496	1.515	0	37.408	37.869	0	1.973	2.038	2.116	49.319	50.945	52.903
PI3Kd_WT_idelalisib	YSNEEAGSGGSVGIIFKNGDDLRQDM	763	788	3	24	16.81	4.094	4.622	4.007	17.06	19.259	16.696	5.868	6.214	0	24.448	25.893	0	7.956	7.828	7.57	33.15	32.615	31.54
PI3Kd_WT_idelalisib	EAGSGGSVGIIFKNGDDL	767	784	2	16	16.49	2.165	2.024	0	13.534	12.652	0	2.886	2.755	0	18.035	17.217	0	3.274	3.538	3.576	20.465	22.11	22.35
PI3Kd_WT_idelalisib	EAGSGGSVGIIFKNGDDLRQDM	767	788	2	20	16.38	2.232	1.87	0	11.158	9.352	0	4.056	4.1	0	20.28	20.499	0	5.837	6.003	6.674	29.187	30.013	33.37
PI3Kd_WT_idelalisib	EAGSGGSVGIIFKNGDDLRQDMLT	767	790	3	22	17.66	2.248	3.181	1.992	10.219	14.459	9.055	3.857	3.912	0	17.533	17.78	0	5.629	5.755	6.092	25.585	26.159	27.689
PI3Kd_WT_idelalisib	MDVLWKQEGLD	797	807	2	9	16.19	0.094	0	0.094	1.049	0	1.048	0	0.368	0	0	4.092	0	0.915	0	0.856	10.162	0	9.508
PI3Kd_WT_idelalisib	MDVLWKQEGLDL	797	808	2	10	19.55	0.093	0.075	0.048	0.931	0.746	0.478	0.237	0.273	0	2.368	2.733	0	0.771	0.74	0.678	7.708	7.403	6.778
PI3Kd_WT_idelalisib	DVLWKQEGLDL	798	808	2	9	18.63	0.073	0.017	0.133	0.814	0.189	1.481	0.226	0	0	2.508	0	0	0.738	0.806	0.854	8.2	8.956	9.49
PI3Kd_WT_idelalisib	VLWKQEGLDL	799	808	2	8	17.63	0.114	0.084	0.165	1.419	1.054	2.058	0.322	0.264	0	4.025	3.306	0	0.773	0.831	0.867	9.66	10.386	10.84
PI3Kd_WT_idelalisib	WKQEGLD	801	807	2	5	8.15	0.104	0.08	0.057	2.086	1.604	1.131	0.3	0.351	0	5.997	7.014	0	1.158	1.174	1.216	23.154	23.489	24.32
PI3Kd_WT_idelalisib	WKQEGLDL	801	808	2	6	14.9	0.043	0.036	-0.009	0.719	0.594	-0.143	0.264	0.243	0	4.404	4.048	0	0	0.834	0.833	0	13.903	13.883
PI3Kd_WT_idelalisib	LRMTPYGCLPTGDRTGL	808	824	3	13	15.28	0.637	0.489	0.434	4.897	3.76	3.341	0.609	0.622	0	4.682	4.785	0	0.899	1.037	1.134	6.913	7.981	8.722
PI3Kd_WT_idelalisib	LRMTPYGCLPTGDRTGLIE	808	826	3	15	16	0.629	0.483	0.471	4.192	3.221	3.143	0.767	0.617	0	5.113	4.112	0	0.892	1.073	1.098	5.947	7.155	7.319
PI3Kd_WT_idelalisib	RMTPYGCLPTGDRTGL	809	824	3	12	13.91	0.67	0	0.439	5.584	0	3.656	0.724	0.512	0	6.034	4.266	0	0.857	1.065	1.017	7.141	8.873	8.476
PI3Kd_WT_idelalisib	RMTPYGCLPTGDRTGLIE	809	826	3	14	14.7	0.629	0.498	0.473	4.49	3.555	3.382	0.655	0.667	0	4.678	4.763	0	0.958	1.066	1.007	6.845	7.612	7.194
PI3Kd_WT_idelalisib	TPYGCLPTGDRTGLIE	811	826	2	13	14.73	0.733	0.559	0.858	5.642	4.302	6.604	0.617	0	0	4.75	0	0	0	1.201	1.176	0	9.238	9.05
PI3Kd_WT_idelalisib	VVLRSDTIA	827	835	1	7	8.22	0.992	1.017	0.957	14.169	14.531	13.666	1.543	1.517	0	22.042	21.676	0	0	2.084	2.076	0	29.777	29.651
PI3Kd_WT_idelalisib	VVLRSDTIA	827	835	2	7	8.22	1.042	0.998	0.899	14.884	14.264	12.842	1.61	1.596	0	23.004	22.806	0	1.991	2.077	2.027	28.44	29.672	28.955
PI3Kd_WT_idelalisib	VVLRSDTIAN	827	836	1	8	6.94	1.09	1.077	0.987	13.631	13.464	12.333	1.64	1.602	0	20.503	20.02	0	2.096	2.196	2.209	26.195	27.456	27.606
PI3Kd_WT_idelalisib	VVLRSDTIAN	827	836	2	8	6.94	1.055	1.043	0.952	13.193	13.034	11.906	1.626	1.584	0	20.328	19.795	0	2.099	2.209	2.163	26.237	27.609	27.033
PI3Kd_WT_idelalisib	VVLRSDTIANIQL	827	839	2	11	16.8	0.983	0.95	0.875	8.941	8.641	7.951	1.745	1.698	0	15.863	15.439	0	2.962	3.104	3.055	26.928	28.222	27.773
PI3Kd_WT_idelalisib	VLRSDTIANIQL	828	839	2	10	16.35	0.091	0.099	0.318	0.911	0.987	3.177	0.348	0.621	0	3.482	6.213	0	1.542	1.489	1.431	15.418	14.894	14.309
PI3Kd_WT_idelalisib	RSDTIANIQL	830	839	2	8	15.21	0.138	0.118	0.077	1.726	1.473	0.964	0.389	0.365	0	4.868	4.562	0	1.308	1.388	1.318	16.35	17.35	16.478
PI3Kd_WT_idelalisib	IANIQL	834	839	1	4	14.45	0.044	0.047	0.049	1.107	1.185	1.213	0.349	0.246	0	8.721	6.16	0	1.184	1.272	1.176	29.612	31.789	29.392
PI3Kd_WT_idelalisib	AATAAFNKDAL	845	855	2	9	10.88	5.767	5.952	5.676	64.075	66.132	63.07	7.142	7.316	0	79.351	81.292	0	7.041	7.03	7.121	78.235	78.11	79.119
PI3Kd_WT_idelalisib	AATAAFNKDALL	845	856	2	10	14.33	5.433	5.445	5.023	54.333	54.45	50.226	6.763	6.369	0	67.626	63.691	0	6.33	6.762	6.974	63.296	67.622	69.743
PI3Kd_WT_idelalisib	AATAAFNKDALLNWLKSKNPGEAL	845	868	4	21	19.18	6.562	6.399	6.215	31.25	30.473	29.594	9.618	9.359	0	45.802	44.567	0	0	10.784	10.971	0	51.353	52.244
PI3Kd_WT_idelalisib	FNKDALL	850	856	2	5	12.91	1.465	1.657	1.37	29.304	33.145	27.401	2.664	2.524	0	53.288	50.489	0	2.488	2.694	2.723	49.759	53.886	54.46
PI3Kd_WT_idelalisib	FNKDALLNWLKSKNPGEAL	850	868	3	16	18.94	3.643	3.679	3.472	22.769	22.995	21.698	6.487	6.31	0	40.545	39.439	0	7.703	7.966	8.033	48.142	49.79	50.206
PI3Kd_WT_idelalisib	FNKDALLNWLKSKNPGEALDRAIEE	850	874	4	22	19.72	3.751	3.99	3.559	17.049	18.138	16.175	7.85	7.11	0	35.68	32.318	0	9.162	9.47	9.624	41.647	43.043	43.747
PI3Kd_WT_idelalisib	NKDALL	851	856	1	4	9.27	0.653	0.703	0.614	16.325	17.582	15.347	1.726	1.768	0	43.157	44.19	0	1.866	1.901	1.999	46.638	47.529	49.982
PI3Kd_WT_idelalisib	NKDALLNWLKSKNPGEAL	851	868	3	15	17.73	2.878	2.929	2.809	19.184	19.524	18.729	5.536	5.212	0	36.906	34.747	0	6.571	6.824	6.852	43.804	45.496	45.682
PI3Kd_WT_idelalisib	NKDALLNWLKSKNPGEALDRAIEE	851	874	4	21	18.6	3.127	3.299	3.114	14.893	15.712	14.829	6.988	6.743	0	33.279	32.111	0	8.395	7.864	8.419	39.977	37.448	40.092
PI3Kd_WT_idelalisib	LNWLKSKNPGEAL	856	868	3	10	14.14	2.104	2.286	2.154	21.037	22.859	21.542	3.564	3.534	0	35.641	35.342	0	3.839	4.064	4.088	38.391	40.642	40.882
PI3Kd_WT_idelalisib	LNWLKSKNPGEALDRAIEE	856	874	3	16	15.5	2.691	2.629	2.269	16.819	16.431	14.181	4.856	4.925	0	30.348	30.78	0	4.97	4.877	5.107	31.064	30.482	31.917
PI3Kd_WT_idelalisib	NWLKSKNPGEAL	857	868	2	9	12.34	2.277	2.397	2.188	25.301	26.633	24.311	3.666	3.496	0	40.73	38.842	0	0	3.94	4.101	0	43.773	45.566
PI3Kd_WT_idelalisib	NWLKSKNPGEALDRA	857	871	3	12	10.8	2.586	2.582	2.522	21.552	21.52	21.018	4.877	4.532	0	40.641	37.768	0	5.15	5.171	5.549	42.921	43.093	46.238
PI3Kd_WT_idelalisib	NWLKSKNPGEALDRAIEE	857	874	3	15	14.28	2.161	0	2.261	14.405	0	15.071	4.689	4.841	0	31.258	32.274	0	5.235	5.297	0	34.903	35.312	0
PI3Kd_WT_idelalisib	DRAIEE	869	874	1	4	2.61	0.009	0.002	0.017	0.218	0.045	0.414	0.016	-0.031	0	0.395	-0.784	0	-0.002	0.016	0.016	-0.046	0.411	0.399
PI3Kd_WT_idelalisib	DRAIEEF	869	875	2	5	11.84	-0.016	0.002	0.002	-0.327	0.031	0.04	0.017	0.036	0	0.35	0.717	0	0.01	-0.001	-0.033	0.191	-0.017	-0.665
PI3Kd_WT_idelalisib	FTLSCAG	875	881	1	5	13.22	0.034	0.004	0.009	0.688	0.073	0.172	0.016	0.025	0	0.322	0.492	0	0.015	0.032	0.011	0.304	0.639	0.229
PI3Kd_WT_idelalisib	FTLSCAGY	875	882	1	6	17.1	0.009	-0.031	-0.009	0.15	-0.51	-0.158	-0.013	-0.026	0	-0.214	-0.434	0	-0.031	-0.028	-0.046	-0.521	-0.46	-0.76
PI3Kd_WT_idelalisib	TLSCAG	876	881	1	4	4.44	0.181	0.164	-0.028	4.521	4.111	-0.706	0.068	0.008	0	1.69	0.194	0	0.006	0.107	0.092	0.144	2.668	2.304
PI3Kd_WT_idelalisib	TYVLGIGDRHSDN	886	898	2	11	10.73	0.597	0.574	0.324	5.429	5.217	2.95	0.947	0.878	0	8.613	7.982	0	1.444	1.285	1.386	13.128	11.686	12.598
PI3Kd_WT_idelalisib	YVLGIGDRHSDN	887	898	3	10	9.91	0.413	0.364	0.329	4.134	3.642	3.293	0.866	0.802	0	8.657	8.015	0	1.154	1.233	1.39	11.538	12.325	13.9
PI3Kd_WT_idelalisib	YVLGIGDRHSDNIM	887	900	3	12	14.35	0.223	0.154	0.095	1.861	1.281	0.791	0.545	0.506	0	4.542	4.218	0	0.782	0.85	0.823	6.519	7.086	6.86
PI3Kd_WT_idelalisib	IRESGQL	901	907	2	5	5.43	0.185	0.11	0.044	3.708	2.195	0.888	0.318	0.37	0	6.359	7.408	0	0.759	0.842	0.822	15.189	16.838	16.446
PI3Kd_WT_idelalisib	IRESGQLFHIDF	901	912	3	10	19.1	0.135	0.07	0.071	1.348	0.701	0.712	0.162	0.13	0	1.618	1.303	0	0.119	0.243	0.225	1.192	2.433	2.251
PI3Kd_WT_idelalisib	IRESGQLFHIDFGHF	901	915	3	13	19.25	0.342	0.329	0.267	2.627	2.531	2.055	1.025	0	0	7.888	0	0	0	1.157	1.207	0	8.899	9.288
PI3Kd_WT_idelalisib	IRESGQLFHIDFGHFLGNF	901	919	4	17	20.78	1.601	1.508	1.406	9.416	8.869	8.271	3.27	3.098	0	19.233	18.224	0	4.05	3.845	4.223	23.823	22.619	24.84
PI3Kd_WT_idelalisib	FHIDFGHF	908	915	1	6	18.5	0.199	0.256	0.255	3.31	4.261	4.244	1.122	1.054	0	18.693	17.562	0	0.84	1.12	1.137	13.999	18.675	18.955
PI3Kd_WT_idelalisib	FHIDFGHFLGNF	908	919	3	10	20.9	1.181	1.466	1.276	11.807	14.66	12.762	3.116	2.999	0	31.159	29.988	0	3.777	3.815	4.026	37.772	38.152	40.264
PI3Kd_WT_idelalisib	HIDFGHF	909	915	2	5	14.46	0.261	0.25	0.19	5.224	4.997	3.796	1.126	1.069	0	22.519	21.375	0	1.218	1.274	1.321	24.355	25.487	26.423
PI3Kd_WT_idelalisib	HIDFGHFLGNF	909	919	2	9	20.35	1.541	1.357	1.752	17.127	15.076	19.467	3.313	3.314	0	36.81	36.822	0	3.848	3.882	4.036	42.755	43.139	44.842
PI3Kd_WT_idelalisib	LGNFKTKFGINRERVPFIL	916	934	4	16	16.87	3.476	3.375	0	21.723	21.095	0	4.068	4.067	0	25.428	25.42	0	4.491	4.814	4.916	28.07	30.09	30.728
PI3Kd_WT_idelalisib	RERVPFIL	927	934	2	5	16.95	0.551	0.539	0	11.011	10.788	0	1.191	1.18	0	23.819	23.596	0	1.818	2.012	1.793	36.365	40.243	35.861
PI3Kd_WT_idelalisib	YDFVHVIQQGKTNNSEKF	936	953	3	16	13.94	4.451	4.321	3.804	27.817	27.007	23.775	5.327	4.463	0	33.291	27.897	0	5.046	5.236	5.662	31.54	32.726	35.385
PI3Kd_WT_idelalisib	YDFVHVIQQGKTNNSEKFERFRG	936	958	3	21	12.98	3.038	2.939	2.633	14.467	13.994	12.539	3.909	3.978	0	18.613	18.945	0	4.946	5.201	5.407	23.551	24.765	25.748
PI3Kd_WT_idelalisib	FVHVIQQGKTNNSEKFERF	938	956	4	17	10.35	2.127	2.086	1.743	12.51	12.268	10.255	3.142	3.04	0	18.483	17.88	0	3.657	3.785	4.098	21.513	22.265	24.104
PI3Kd_WT_idelalisib	FVHVIQQGKTNNSEKFERFRG	938	958	4	19	8.53	2.051	1.755	1.714	10.794	9.237	9.024	2.845	2.796	0	14.974	14.716	0	3.438	3.565	3.755	18.095	18.761	19.764
PI3Kd_WT_idelalisib	VHVIQQGKTNNSEKFERFRG	939	958	3	18	6.86	2.141	2.135	1.809	11.896	11.861	10.05	3.172	3.002	0	17.621	16.68	0	3.694	3.889	4.304	20.522	21.606	23.913
PI3Kd_WT_idelalisib	HVIQQGKTNNSEKFERFRG	940	958	4	17	6.09	2.498	2.479	2.153	14.693	14.585	12.666	3.405	3.031	0	20.031	17.829	0	3.9	4.064	4.334	22.939	23.908	25.494
PI3Kd_WT_idelalisib	RGYCERA	957	963	2	5	2.45	0.022	0.011	0.301	0.436	0.227	6.024	0.147	0.126	0	2.946	2.511	0	0.119	0.128	0.048	2.383	2.56	0.969
PI3Kd_WT_idelalisib	RAYTIL	962	967	1	4	13.16	0.047	0.008	-0.032	1.166	0.198	-0.811	0.047	0.04	0	1.166	1.009	0	-0.036	0.002	-0.052	-0.906	0.055	-1.296
PI3Kd_WT_idelalisib	YTILRRHGLLF	964	974	2	9	15.8	0.395	0.409	0.316	4.384	4.542	3.507	0.737	0.65	0	8.185	7.227	0	1.044	1.118	1.115	11.595	12.417	12.393
PI3Kd_WT_idelalisib	ILRRHGLL	966	973	2	6	7.22	0.427	0.234	0.279	7.113	3.893	4.643	0.722	0.676	0	12.037	11.273	0	0.992	1.085	1.075	16.539	18.089	17.914
PI3Kd_WT_idelalisib	ILRRHGLLF	966	974	2	7	13.57	0.372	0	0.356	5.31	0	5.084	0.614	0.557	0	8.771	7.951	0	0.879	0	0.986	12.552	0	14.09
PI3Kd_WT_idelalisib	FALMRAAGL	978	986	2	7	17.04	0.592	0.52	0.426	8.454	7.429	6.091	2.218	2.251	0	31.687	32.16	0	3.848	3.756	3.707	54.969	53.662	52.951
PI3Kd_WT_idelalisib	FALMRAAGLPEL	978	989	2	9	19.8	0.713	0.603	0.592	7.922	6.698	6.573	2.723	2.616	0	30.254	29.068	0	4.997	5.249	5.165	55.523	58.318	57.389
PI3Kd_WT_idelalisib	RAAGLPEL	982	989	2	5	13.32	0.411	0.326	0.378	8.228	6.51	7.561	1.818	1.736	0	36.361	34.722	0	3.492	3.639	3.481	69.842	72.782	69.619
PI3Kd_WT_idelalisib	RAAGLPELSC	982	991	2	7	13.04	1.477	1.473	1.412	21.102	21.037	20.177	3.43	3.351	0	49.003	47.871	0	5.102	5.27	5.366	72.879	75.283	76.659
PI3Kd_WT_idelalisib	PELSCSKDIQY	987	997	2	9	12.18	2.307	2.282	2.301	25.639	25.352	25.567	4.666	4.247	0	51.842	47.185	0	4.96	5.222	5.306	55.109	58.024	58.957
PI3Kd_WT_idelalisib	PELSCSKDIQYLKD	987	1000	3	12	12.53	1.884	1.877	1.531	15.702	15.641	12.758	4.118	3.914	0	34.316	32.616	0	5.153	5.373	5.405	42.942	44.771	45.04
PI3Kd_WT_idelalisib	SCSKDIQY	990	997	2	6	7.04	1.75	0	1.292	29.172	0	21.535	3.728	3.632	0	62.134	60.537	0	3.767	3.843	4.128	62.781	64.051	68.801
PI3Kd_WT_idelalisib	SCSKDIQYLKD	990	1000	3	9	8.41	1.425	1.589	1.274	15.837	17.654	14.157	3.289	3.511	0	36.55	39.014	0	4.439	4.435	4.671	49.324	49.282	51.901
PI3Kd_WT_idelalisib	SCSKDIQYLKDSL	990	1002	3	11	15.43	1.175	1.295	0.903	10.681	11.77	8.207	3.809	3.274	0	34.63	29.764	0	4.434	4.592	4.445	40.314	41.744	40.408
PI3Kd_WT_idelalisib	SKDIQYLKDSL	992	1002	2	9	12.78	0.984	0.973	1.13	10.938	10.811	12.556	2.454	2.577	0	27.266	28.637	0	3.575	2.958	3.315	39.717	32.869	36.833
PI3Kd_WT_idelalisib	IQYLKDSL	995	1002	2	6	13.15	0.466	0.513	0.452	7.768	8.545	7.534	0.873	0.87	0	14.551	14.508	0	1.307	1.419	1.365	21.783	23.657	22.758
PI3Kd_WT_idelalisib	LKDSLALGKTEEEALKHFRVKF	998	1019	5	20	16.51	2.785	2.666	2.434	13.927	13.329	12.172	3.276	3.477	0	16.382	17.384	0	5.272	5.132	5.757	26.361	25.662	28.784
PI3Kd_WT_idelalisib	SLALGKTEE	1001	1009	2	7	7.18	2.777	2.724	2.634	39.669	38.912	37.636	3.449	3.402	0	49.268	48.603	0	3.894	4.274	4.278	55.628	61.062	61.109
PI3Kd_WT_idelalisib	SLALGKTEEE	1001	1010	2	8	7.45	2.649	2.618	2.662	33.109	32.723	33.271	3.582	3.497	0	44.778	43.715	0	4.464	0	4.69	55.8	0	58.62
PI3Kd_WT_idelalisib	SLALGKTEEEALKHFRVKF	1001	1019	4	17	16.61	2.31	2.281	2.182	13.585	13.42	12.835	3.15	3.101	0	18.529	18.242	0	4.37	4.512	4.549	25.703	26.541	26.757
PI3Kd_WT_idelalisib	SLALGKTEEEALKHFRVKFNE	1001	1021	4	19	16.01	2.405	2.226	2.163	12.659	11.714	11.385	3.123	3.185	0	16.435	16.763	0	4.724	4.604	4.387	24.865	24.231	23.09
PI3Kd_WT_idelalisib	SLALGKTEEEALKHFRVKFNEA	1001	1022	3	20	16.1	2.38	3.71	2.334	11.9	18.552	11.67	3.021	3.452	0	15.103	17.258	0	4.565	4.468	4.553	22.826	22.342	22.763
PI3Kd_WT_idelalisib	SLALGKTEEEALKHFRVKFNEAL	1001	1023	4	21	17.9	2.187	2.236	2.22	10.415	10.649	10.57	3.133	0	0	14.917	0	0	0	4.618	4.594	0	21.993	21.875
PI3Kd_WT_idelalisib	ALGKTEEEALKHFRVKF	1003	1019	4	15	14.69	1.615	1.839	1.642	10.764	12.263	10.948	2.247	2.491	0	14.978	16.606	0	3.316	3.537	3.276	22.103	23.578	21.839
PI3Kd_WT_idelalisib	ALGKTEEEALKHFRVKFNE	1003	1021	4	17	14.42	1.921	1.627	1.682	11.301	9.57	9.893	2.494	2.552	0	14.669	15.014	0	3.652	3.77	3.725	21.484	22.177	21.911
PI3Kd_WT_idelalisib	ALGKTEEEALKHFRVKFNEA	1003	1022	4	18	14.16	1.824	1.813	1.777	10.133	10.072	9.872	2.608	2.519	0	14.487	13.995	0	3.68	3.536	3.957	20.446	19.642	21.983
PI3Kd_WT_idelalisib	ALGKTEEEALKHFRVKFNEAL	1003	1023	3	19	16.31	1.755	2.396	1.713	9.237	12.611	9.016	2.427	2.381	0	12.775	12.534	0	3.422	3.589	3.592	18.009	18.891	18.905
PI3Kd_WT_idelalisib	EALKHFRVKF	1010	1019	3	8	10.54	0.013	-0.003	0	0.162	-0.041	0	0.018	0.022	0	0.219	0.269	0	0.186	0.183	0.134	2.33	2.287	1.679
PI3Kd_WT_idelalisib	EALKHFRVKFNE	1010	1021	3	10	9.46	0.032	0.023	0.022	0.317	0.228	0.222	0.05	0.057	0	0.503	0.571	0	0.215	0.249	0.205	2.153	2.489	2.053
PI3Kd_WT_idelalisib	EALKHFRVKFNEA	1010	1022	2	11	9.53	1.242	1.1	0.802	11.294	10.003	7.29	0	2.305	0	0	20.95	0	0	3.029	3.079	0	27.537	27.995
PI3Kd_WT_idelalisib	EALKHFRVKFNEAL	1010	1023	3	12	12.38	0.069	0.048	0.045	0.577	0.402	0.374	0.07	0.056	0	0.58	0.469	0	0	0.259	0.21	0	2.158	1.75
PI3Kd_WT_idelalisib	ALKHFRVKFNE	1011	1021	3	9	8.82	0.036	0.044	0.012	0.405	0.493	0.133	0.048	0.025	0	0.528	0.281	0	0.081	0.116	0.084	0.895	1.291	0.932
PI3Kd_WT_idelalisib	ALKHFRVKFNEAL	1011	1023	3	11	11.52	0.311	0.185	0.086	2.828	1.685	0.782	0.056	0.037	0	0.505	0.337	0	0.035	0.055	0.22	0.323	0.497	1.999
PI3Kd_WT_idelalisib	ALRESWKTKVNWLAHNVSKDNRQ	1022	1044	5	21	12	9.382	9.064	8.538	44.674	43.16	40.655	11.975	11.772	0	57.022	56.057	0	11.281	11.886	12.327	53.718	56.601	58.699
PI3Kd_WT_idelalisib	LRESWKTKVNW	1023	1033	3	9	12.25	2.725	2.734	2.397	30.272	30.38	26.635	4.587	4.349	0	50.97	48.322	0	4.178	4.486	4.664	46.424	49.847	51.819
PI3Kd_WT_idelalisib	LRESWKTKVNWLAHNVSKDNRQ	1023	1044	5	20	11.48	8.114	8.104	7.999	40.57	40.522	39.993	11.216	11.089	0	56.079	55.444	0	10.592	10.714	11.199	52.961	53.572	55.997
PI3Kd_WT_idelalisib	RESWKTKVNW	1024	1033	3	8	11.85	2.575	2.607	2.519	32.192	32.586	31.485	4.57	4.477	0	57.129	55.967	0	4.288	4.426	4.612	53.605	55.325	57.655
PI3Kd_WT_idelalisib	RESWKTKVNWLAHNVSKDNRQ	1024	1044	4	19	10.98	8.46	8.363	7.778	44.526	44.016	40.936	11.539	11.235	0	60.732	59.13	0	11.127	11.123	11.7	58.561	58.543	61.577
PI3Kd_WT_idelalisib	RESWKTKVNWLAHNVSKDNRQ	1024	1044	5	19	10.98	8.401	8.365	8.238	44.215	44.025	43.355	11.498	11.234	0	60.514	59.126	0	11.166	11.171	11.91	58.77	58.792	62.685
PI3Kd_WT_idelalisib	SWKTKVNWLAHNVSKDNRQ	1026	1044	4	17	11.8	8.037	7.979	8.249	47.278	46.933	48.521	10.866	10.685	0	63.916	62.853	0	10.548	10.838	11.178	62.045	63.754	65.752
PI3Kd_WT_idelalisib	SWKTKVNWLAHNVSKDNRQ	1026	1044	5	17	11.8	8.775	8.459	8.442	51.615	49.762	49.659	11.568	11.804	0	68.044	69.434	0	10.668	11.092	11.38	62.754	65.245	66.944
PI3Kd_WT_idelalisib	KTKVNWLAHNVSKDNRQ	1028	1044	4	15	6	5.316	5.332	5.07	35.438	35.548	33.801	7.163	6.853	0	47.752	45.685	0	7.029	6.894	7.3	46.863	45.96	48.665
PI3Kd_Y685A_idelalisib	FWTKEENQS	11	19	2	7	7.92	4.531	4.468	4.488	64.724	63.828	64.108	4.787	4.737	4.397	68.383	67.671	62.812	4.239	4.524	4.689	60.556	64.632	66.983
PI3Kd_Y685A_idelalisib	WTKEENQS	12	19	2	6	1.85	0	4.235	4.066	0	70.576	67.774	4.319	4.055	4.012	71.984	67.591	66.869	4.047	4.205	4.523	67.45	70.09	75.384
PI3Kd_Y685A_idelalisib	WTKEENQSV	12	20	1	7	5.85	4.187	0	4.043	59.809	0	57.757	4.455	4.269	4.219	63.64	60.983	60.27	4.492	5	4.973	64.175	71.429	71.04
PI3Kd_Y685A_idelalisib	WTKEENQSVV	12	21	2	8	8.05	3.685	4.039	3.805	46.069	50.487	47.565	4.633	4.75	4.315	57.909	59.369	53.933	4.728	5.406	5.448	59.104	67.575	68.102
PI3Kd_Y685A_idelalisib	WTKEENQSVVVD	12	23	2	10	8.33	3.906	3.858	3.845	39.057	38.575	38.45	4.736	4.471	4.421	47.362	44.713	44.206	5.068	5.588	5.646	50.679	55.883	56.461
PI3Kd_Y685A_idelalisib	VVDFLLPTGVY	21	31	1	8	21.11	0.277	-0.116	0	3.46	-1.453	0	0.246	0.42	0.545	3.08	5.247	6.816	0	1.194	1.049	0	14.924	13.107
PI3Kd_Y685A_idelalisib	FLLPTGV	24	30	1	4	18.18	0.074	0.064	0.08	1.843	1.611	2.005	0.491	0.398	0.416	12.271	9.96	10.397	0	1.109	1.085	0	27.735	27.134
PI3Kd_Y685A_idelalisib	FLLPTGVY	24	31	1	5	19.59	0.07	0.05	0.066	1.402	1.008	1.324	0.462	0.421	0.423	9.242	8.425	8.458	0	1.097	1.061	0	21.941	21.224
PI3Kd_Y685A_idelalisib	YLNFPVSRNANL	31	42	2	9	15.63	2.012	1.837	1.921	22.361	20.408	21.345	3.148	3.026	2.908	34.974	33.625	32.308	3.021	3.359	3.412	33.565	37.322	37.913
PI3Kd_Y685A_idelalisib	LNFPVSRNANL	32	42	2	8	13.59	1.464	1.305	1.309	18.299	16.312	16.369	2.583	2.423	2.389	32.288	30.285	29.861	2.578	2.768	2.834	32.219	34.599	35.428
PI3Kd_Y685A_idelalisib	LNFPVSRNANLST	32	44	2	10	12.39	1.308	1.208	1.261	13.081	12.083	12.61	2.719	2.547	2.466	27.187	25.466	24.657	3.511	3.914	3.934	35.112	39.141	39.34
PI3Kd_Y685A_idelalisib	PVSRNANL	35	42	2	6	4.51	1.663	1.516	1.585	27.716	25.266	26.421	3.059	2.835	2.862	50.978	47.246	47.701	0	2.672	3.286	0	44.536	54.769
PI3Kd_Y685A_idelalisib	STIKQLL	43	49	2	5	13.27	0.078	0.025	-0.041	1.561	0.496	-0.812	0.017	-0.011	-0.01	0.332	-0.224	-0.207	0	0.021	0.022	0	0.421	0.435
PI3Kd_Y685A_idelalisib	STIKQLLWHRAQYEPLF	43	59	3	14	18.36	0.643	0.547	0.581	4.592	3.908	4.15	1.457	1.426	1.393	10.41	10.189	9.951	0	2.819	2.795	0	20.135	19.965
PI3Kd_Y685A_idelalisib	STIKQLLWHRAQYEPLFHMLSGPEA	43	67	3	21	19.44	2.756	2.608	2.816	13.122	12.417	13.409	5.195	4.936	5.289	24.74	23.507	25.187	4.461	7.167	7.053	21.244	34.131	33.585
PI3Kd_Y685A_idelalisib	LLWHRAQYEPLF	48	59	2	9	18.7	0.519	0.519	0	5.765	5.762	0	1.289	1.441	1.28	14.318	16.016	14.223	0	2.35	2.556	0	26.115	28.396
PI3Kd_Y685A_idelalisib	HMLSGPEA	60	67	2	5	6.4	1.495	1.369	1.774	29.909	27.374	35.488	2.452	2.368	2.22	49.044	47.354	44.398	2.76	0	2.692	55.197	0	53.836
PI3Kd_Y685A_idelalisib	TCINQTAEQQEL	71	82	2	10	10.21	1.294	2.539	1.339	12.944	25.392	13.386	2.785	2.652	2.683	27.854	26.522	26.828	0	3.557	3.564	0	35.57	35.64
PI3Kd_Y685A_idelalisib	TCINQTAEQQELEDEQRRLCDVQPFL	71	96	3	23	20.05	4.08	3.766	3.997	17.738	16.374	17.379	8.027	7.829	7.933	34.899	34.04	34.49	10.388	10.581	10.561	45.164	46.006	45.917
PI3Kd_Y685A_idelalisib	EDEQRRLCDVQPFL	83	96	2	11	17.2	0.749	0.566	0.97	6.806	5.143	8.818	2.214	2.173	2.144	20.131	19.756	19.49	3.575	3.58	3.692	32.496	32.548	33.565
PI3Kd_Y685A_idelalisib	EQRRLCDVQPFL	85	96	2	9	16.52	0.501	0.442	0.516	5.565	4.916	5.729	1.536	1.593	1.439	17.07	17.7	15.987	0	2.704	2.635	0	30.05	29.279
PI3Kd_Y685A_idelalisib	QRRLCDVQPFLPVLRLV	86	102	3	13	9.83	0.302	0.18	0.347	2.32	1.388	2.672	1.058	0.969	1.278	8.141	7.452	9.828	1.899	2.423	2.308	14.605	18.641	17.755
PI3Kd_Y685A_idelalisib	RRLCDVQPFLPVLRL	87	101	3	11	20.63	0.027	0.061	0.627	0.248	0.55	5.704	1.281	1.352	1.189	11.649	12.292	10.812	2.049	2.84	1.873	18.63	25.819	17.024
PI3Kd_Y685A_idelalisib	VQPFLPVLRL	92	101	2	6	20.96	-0.03	0.065	-0.225	-0.506	1.075	-3.753	0.15	0.046	0.046	2.504	0.768	0.763	0.811	0.839	0.692	13.521	13.982	11.536
PI3Kd_Y685A_idelalisib	RLVAREGDRVKKLINSQISLL	100	120	3	19	15.26	7.886	7.301	7.077	41.507	38.426	37.247	8.628	8.737	8.117	45.409	45.984	42.721	8.467	8.757	8.04	44.564	46.092	42.314
PI3Kd_Y685A_idelalisib	VAREGDRVKKLINS	102	115	2	12	6.04	7.331	6.47	6.798	61.088	53.913	56.652	7.016	7.68	6.739	58.465	64.002	56.16	0	7.102	7.271	0	59.184	60.589
PI3Kd_Y685A_idelalisib	VAREGDRVKKLINSQ	102	116	2	13	6.59	6.886	7.097	7.022	52.966	54.59	54.018	7.616	7.591	8.319	58.582	58.392	63.996	7.899	7.962	8	60.763	61.243	61.54
PI3Kd_Y685A_idelalisib	VAREGDRVKKLINSQISL	102	119	3	16	12.72	6.504	6.163	6.678	40.647	38.517	41.735	7.254	7.203	7.378	45.334	45.019	46.11	8.056	7.909	7.686	50.347	49.434	48.035
PI3Kd_Y685A_idelalisib	VAREGDRVKKLINSQISLL	102	120	2	17	15.69	6.692	6.218	6.653	39.362	36.575	39.133	7.17	6.946	6.656	42.178	40.857	39.151	8.278	8.15	8.053	48.694	47.938	47.372
PI3Kd_Y685A_idelalisib	LIGKGLHE	120	127	2	6	5.27	0.678	0.539	0.536	11.308	8.98	8.933	1.282	1.122	1.087	21.36	18.693	18.122	0	2.542	2.405	0	42.375	40.081
PI3Kd_Y685A_idelalisib	LIGKGLHEFDSL	120	131	2	10	15.17	0.904	0.778	0.82	9.036	7.779	8.202	2.548	2.467	2.3	25.485	24.669	22.996	0	3.229	3.355	0	32.29	33.553
PI3Kd_Y685A_idelalisib	LIGKGLHEFDSLCDPEVND	120	138	3	16	17	1.909	1.8	1.845	11.929	11.25	11.529	3.987	3.688	3.365	24.916	23.053	21.03	0	5.252	5.329	0	32.827	33.307
PI3Kd_Y685A_idelalisib	LIGKGLHEFDSLCDPEVNDF	120	139	3	17	19.29	1.978	1.761	1.937	11.637	10.36	11.397	3.573	3.518	3.259	21.018	20.692	19.171	4.648	5.014	5.117	27.341	29.494	30.103
PI3Kd_Y685A_idelalisib	IGKGLHE	121	127	1	5	2.42	0.584	0.536	0.49	11.676	10.711	9.809	1.389	1.062	0.971	27.772	21.247	19.419	2.118	2.371	2.627	42.365	47.412	52.531
PI3Kd_Y685A_idelalisib	IGKGLHEF	121	128	2	6	9.35	0.207	0.099	0.208	3.444	1.647	3.468	0.862	0.723	0.715	14.372	12.053	11.916	0	1.451	1.524	0	24.183	25.406
PI3Kd_Y685A_idelalisib	IGKGLHEFDSL	121	131	2	9	13.9	0.789	0.673	0.766	8.766	7.477	8.507	2.543	2.218	2.314	28.25	24.643	25.714	1.883	2.778	3.022	20.923	30.866	33.577
PI3Kd_Y685A_idelalisib	IGKGLHEFDSLCDPEVND	121	138	3	15	16.05	1.963	1.803	1.995	13.085	12.022	13.299	3.619	3.545	3.675	24.129	23.635	24.502	4.528	4.919	4.652	30.19	32.793	31.014
PI3Kd_Y685A_idelalisib	GKGLHE	122	127	1	4	2.43	0.469	0.456	0.205	11.721	11.403	5.118	1.141	0.897	0.782	28.522	22.415	19.558	1.725	2.049	2.101	43.119	51.221	52.523
PI3Kd_Y685A_idelalisib	FDSLCDPEVNDF	128	139	1	9	18.84	0.888	0.814	0.758	9.861	9.048	8.427	1.579	1.542	1.569	17.544	17.129	17.436	0	2.548	2.475	0	28.313	27.505
PI3Kd_Y685A_idelalisib	CDPEVND	132	138	1	4	3.32	0.147	0.136	0.054	3.673	3.398	1.35	0.328	0.293	0.283	8.192	7.321	7.08	1.506	1.307	1.317	37.643	32.663	32.936
PI3Kd_Y685A_idelalisib	CDPEVNDF	132	139	1	5	12.52	0.155	0.108	0.151	3.108	2.16	3.021	0.34	0.274	0.264	6.806	5.481	5.284	0	1.186	1.116	0	23.714	22.31
PI3Kd_Y685A_idelalisib	PEVNDF	134	139	1	4	11.67	0.065	0.12	0.112	1.632	3.012	2.795	0.137	0.036	0.101	3.416	0.902	2.534	0.454	0.578	0.596	11.34	14.44	14.891
PI3Kd_Y685A_idelalisib	FRAKMCQF	139	146	2	6	12.21	0.093	0.064	0.07	1.542	1.061	1.168	0.672	0.598	0.591	11.2	9.973	9.849	1.582	1.733	1.687	26.372	28.881	28.11
PI3Kd_Y685A_idelalisib	FCEEAAARRQQLGWEAW	146	162	3	15	18.19	1.532	1.307	1.42	10.21	8.715	9.47	3.551	3.414	3.379	23.671	22.76	22.529	0	7.063	6.89	0	47.084	45.932
PI3Kd_Y685A_idelalisib	CEEAAARRQQLGWEAW	147	162	3	14	17.4	1.468	1.259	1.329	10.483	8.991	9.49	3.433	3.282	3.143	24.519	23.444	22.453	5.942	6.596	6.515	42.444	47.118	46.535
PI3Kd_Y685A_idelalisib	AAARRQQLGWEA	150	161	2	10	10.2	1.493	1.311	1.393	14.927	13.111	13.928	3.416	3.2	3.195	34.162	31.998	31.954	6.382	5.787	6.049	63.82	57.872	60.486
PI3Kd_Y685A_idelalisib	AAARRQQLGWEAW	150	162	2	11	17.58	1.351	1.162	1.24	12.284	10.562	11.276	3.051	2.894	2.765	27.741	26.313	25.136	4.767	5.371	5.361	43.332	48.827	48.74
PI3Kd_Y685A_idelalisib	AARRQQLGWEAW	151	162	2	10	17.67	1.241	1.122	1.436	12.412	11.219	14.363	2.842	2.601	2.655	28.425	26.013	26.545	4.863	4.809	4.726	48.629	48.094	47.259
PI3Kd_Y685A_idelalisib	ARRQQLGWEAW	152	162	2	9	17.68	1.165	1.068	1.436	12.949	11.864	15.959	0	2.516	2.492	0	27.95	27.694	0	4.384	4.852	0	48.713	53.91
PI3Kd_Y685A_idelalisib	WLQYSFPLQLEPSAQTWGPGTLRLPNRALL	162	191	3	24	20.95	9.216	9.562	9.964	38.402	39.841	41.516	11.94	11.136	11.363	49.752	46.4	47.347	13.618	14.122	13.399	56.742	58.842	55.83
PI3Kd_Y685A_idelalisib	LQYSFPLQLEPSAQTWGPGTLRLPNRALL	163	191	3	23	20.63	10.186	9.987	10.578	44.289	43.421	45.992	12.318	11.712	11.851	53.558	50.92	51.526	14.139	14.572	14.504	61.472	63.357	63.061
PI3Kd_Y685A_idelalisib	QYSFPLQLEPSAQTWGPGTLRLPNRALL	164	191	3	22	20.56	10.102	10.078	10.63	45.918	45.81	48.32	12.426	11.806	11.849	56.483	53.664	53.861	14.304	14.681	14.423	65.019	66.73	65.557
PI3Kd_Y685A_idelalisib	PLQLEPSAQTWGPGTLRLPNRALL	168	191	3	19	19.42	10.629	10.448	10.428	55.943	54.988	54.887	12.233	11.833	11.761	64.385	62.278	61.901	0	13.39	13.864	0	70.474	72.968
PI3Kd_Y685A_idelalisib	QTWGPGTLRLPNRALL	176	191	3	12	17.82	7.421	7.275	7.325	61.839	60.625	61.045	8.392	8.084	7.473	69.935	67.366	62.278	9.059	9.247	9.46	75.488	77.06	78.831
PI3Kd_Y685A_idelalisib	WGPGTLRLPNRALL	178	191	3	10	17.91	5.399	5.263	5.469	53.994	52.632	54.685	0	6.096	6.015	0	60.962	60.148	0	7.37	7.33	0	73.698	73.305
PI3Kd_Y685A_idelalisib	LRLPNRALL	183	191	2	6	13.54	3.273	2.822	2.923	54.546	47.034	48.716	3.818	3.905	3.455	63.632	65.087	57.576	4.257	4.856	0	70.954	80.937	0
PI3Kd_Y685A_idelalisib	VNVKFEGSE	192	200	2	7	7.94	1.868	1.847	1.867	26.693	26.391	26.675	2.519	2.379	2.333	35.99	33.987	33.333	0	3.002	3.083	0	42.882	44.045
PI3Kd_Y685A_idelalisib	VNVKFEGSEE	192	201	2	8	8.28	2.188	2.101	2.226	27.346	26.262	27.823	2.875	2.947	2.825	35.943	36.839	35.311	3.161	3.565	3.619	39.514	44.564	45.238
PI3Kd_Y685A_idelalisib	VNVKFEGSEES	192	202	2	9	7.77	2.947	2.858	2.89	32.74	31.752	32.111	3.919	3.753	3.61	43.542	41.704	40.11	0	4.442	4.568	0	49.353	50.753
PI3Kd_Y685A_idelalisib	VNVKFEGSEESF	192	203	2	10	13.52	3.177	2.999	3.155	31.774	29.986	31.553	4.017	0	3.687	40.171	0	36.87	3.977	0	4.621	39.774	0	46.207
PI3Kd_Y685A_idelalisib	VNVKFEGSEESFT	192	204	2	11	12.71	3.629	3.472	3.598	32.989	31.561	32.707	2.819	4.356	4.249	25.631	39.603	38.626	0	5.274	5.288	0	47.948	48.069
PI3Kd_Y685A_idelalisib	ESFTFQVSTKDVPLAL	201	216	2	13	19.84	2.201	2	2.127	16.929	15.381	16.364	3.957	3.736	3.691	30.439	28.737	28.39	5.139	4.893	4.744	39.534	37.637	36.489
PI3Kd_Y685A_idelalisib	FTFQVSTKDVPLAL	203	216	2	11	19.61	1.42	1.266	1.329	12.909	11.513	12.083	3.088	2.939	2.814	28.073	26.721	25.582	0	3.785	3.803	0	34.409	34.575
PI3Kd_Y685A_idelalisib	TFQVSTKDVPLAL	204	216	2	10	17.14	1.265	1.126	1.223	12.648	11.261	12.228	3.006	2.803	2.76	30.062	28.035	27.602	0	3.749	3.723	0	37.486	37.228
PI3Kd_Y685A_idelalisib	FQVSTKDVPLAL	205	216	2	9	16.83	0.526	0.477	0.518	5.848	5.301	5.755	2.237	1.796	2.023	24.852	19.952	22.478	2.385	2.938	2.94	26.495	32.643	32.662
PI3Kd_Y685A_idelalisib	FQVSTKDVPLALM	205	217	2	10	18.58	0.455	0.584	0	4.55	5.835	0	2.174	1.873	1.945	21.736	18.731	19.447	3.74	2.887	2.904	37.4	28.875	29.038
PI3Kd_Y685A_idelalisib	QVSTKDVPLAL	206	216	2	8	14.06	0.59	0.472	0.634	7.373	5.902	7.921	2.276	2.139	1.971	28.456	26.743	24.633	0	0	3.163	0	0	39.533
PI3Kd_Y685A_idelalisib	VSTKDVPLAL	207	216	2	7	13.9	0.319	0.307	0	4.556	4.382	0	1.704	1.501	1.375	24.347	21.436	19.644	0	1.983	2.194	0	28.328	31.336
PI3Kd_Y685A_idelalisib	ACALRKKATV	218	227	2	8	1.75	1.522	1.333	0.979	19.028	16.66	12.242	3.163	3.29	3.026	39.536	41.131	37.822	4.148	3.897	4.51	51.844	48.718	56.37
PI3Kd_Y685A_idelalisib	CALRKKATV	219	227	2	7	0.88	1.957	1.651	2.069	27.954	23.584	29.557	3.285	3.027	3.149	46.933	43.242	44.989	3.731	0	3.93	53.306	0	56.146
PI3Kd_Y685A_idelalisib	CALRKKATVFRQPLVEQPED	219	238	3	16	8.43	6.59	6.726	6.435	41.186	42.035	40.217	8.133	8.174	8.028	50.829	51.087	50.173	8.741	9.477	9.459	54.631	59.232	59.121
PI3Kd_Y685A_idelalisib	ALRKKATVFRQPLVEQPED	220	238	3	15	8.09	6.572	6.231	6.424	43.811	41.542	42.826	8.312	7.943	7.837	55.414	52.952	52.246	8.309	9.284	9.319	55.396	61.893	62.127
PI3Kd_Y685A_idelalisib	LRKKATVFRQPLVEQPED	221	238	3	14	8.26	6.226	5.766	6.21	44.47	41.186	44.358	7.612	7.409	6.987	54.372	52.921	49.908	8.072	8.487	8.563	57.655	60.621	61.167
PI3Kd_Y685A_idelalisib	RKKATVFRQPLVEQPED	222	238	3	13	7.68	6.224	5.987	6.159	47.876	46.057	47.374	7.855	7.51	7.239	60.424	57.772	55.682	7.858	8.538	8.512	60.444	65.676	65.476
PI3Kd_Y685A_idelalisib	FRQPLVEQPED	228	238	2	7	9.34	3.726	3.709	3.777	53.222	52.984	53.956	4.71	4.575	4.68	67.284	65.364	66.861	5.062	5.522	5.365	72.32	78.889	76.648
PI3Kd_Y685A_idelalisib	YTLQVNGRHEYL	239	250	2	10	12.58	0.316	0.282	0.294	3.159	2.82	2.938	0.378	0.328	0.278	3.784	3.278	2.783	0	0.462	0.463	0	4.622	4.63
PI3Kd_Y685A_idelalisib	YTLQVNGRHEYLYGSY	239	254	3	14	14.1	0.963	0.861	0.987	6.882	6.151	7.047	1.203	1.028	0.991	8.594	7.341	7.08	0	1.75	1.715	0	12.5	12.251
PI3Kd_Y685A_idelalisib	YTLQVNGRHEYLYGSYPLCQ	239	258	3	17	16.2	1.047	0.958	1.035	6.157	5.636	6.088	1.214	1.099	1.089	7.14	6.463	6.406	1.608	1.794	1.769	9.457	10.55	10.407
PI3Kd_Y685A_idelalisib	YTLQVNGRHEYLYGSYPLCQF	239	259	2	18	19.94	0.976	0.89	1.032	5.421	4.947	5.735	1.152	1.043	1.079	6.398	5.794	5.995	2.064	1.738	1.611	11.468	9.654	8.952
PI3Kd_Y685A_idelalisib	LQVNGRHEYL	241	250	2	8	12.69	0.523	0.64	0.402	6.543	8	5.024	0.444	0.441	0.24	5.556	5.508	2.994	0.716	0.713	0.766	8.946	8.908	9.579
PI3Kd_Y685A_idelalisib	QVNGRHEYL	242	250	2	7	7.34	0.21	0.253	0.806	3.002	3.612	11.515	0	0.4	0	0	5.719	0	0.474	0.49	0.566	6.776	7	8.09
PI3Kd_Y685A_idelalisib	QVNGRHEYLYGSYPLCQF	242	259	3	15	19.07	0.904	0.761	0.823	6.025	5.074	5.486	1.01	0.847	0.887	6.737	5.648	5.91	0	1.568	1.456	0	10.456	9.707
PI3Kd_Y685A_idelalisib	YGSYPLCQ	251	258	1	5	13.44	0.521	0.496	0.472	10.42	9.914	9.448	0.524	0.564	0.467	10.476	11.286	9.345	0.434	0.52	0.537	8.671	10.391	10.737
PI3Kd_Y685A_idelalisib	YGSYPLCQF	251	259	2	6	20.27	0.249	0.24	0	4.155	3.998	0	0.287	0.285	0.209	4.777	4.756	3.49	0	0.396	0.452	0	6.594	7.535
PI3Kd_Y685A_idelalisib	FQYICS	259	264	1	4	13.32	0.726	0.632	0.725	18.14	15.809	18.137	0.913	0.876	0.902	22.818	21.894	22.542	0	1.003	1.001	0	25.081	25.033
PI3Kd_Y685A_idelalisib	FQYICSCL	259	266	1	6	20.69	0.066	0.28	0	1.104	4.666	0	0.656	0.126	0	10.941	2.101	0	0	0.538	0	0	8.964	0
PI3Kd_Y685A_idelalisib	QYICSCL	260	266	1	5	17.41	0.018	0.016	0.052	0.362	0.328	1.049	0	0.032	0.023	0	0.631	0.453	0	0.119	0.1	0	2.39	2.004
PI3Kd_Y685A_idelalisib	CLHSGLTPHL	265	274	2	7	10.56	0.954	0.935	0.897	13.625	13.364	12.81	1.184	1.13	1.11	16.914	16.147	15.859	1.714	1.522	1.527	24.491	21.738	21.816
PI3Kd_Y685A_idelalisib	CLHSGLTPHLTM	265	276	2	9	12.73	1.102	1.013	1.172	12.241	11.255	13.02	2.463	2.463	2.734	27.37	27.363	30.379	3.475	3.207	3.596	38.611	35.635	39.951
PI3Kd_Y685A_idelalisib	CLHSGLTPHLTMVHSSSIL	265	283	3	16	14.19	0.654	0.658	0.586	4.09	4.11	3.661	0.719	0.576	0.612	4.495	3.603	3.826	0.674	0.945	0.797	4.215	5.905	4.984
PI3Kd_Y685A_idelalisib	HSGLTPHL	267	274	2	5	8.4	0.878	0.843	0.846	17.551	16.857	16.915	1.103	1.022	1.029	22.058	20.437	20.58	0	0	1.432	0	0	28.633
PI3Kd_Y685A_idelalisib	HSGLTPHLTMVHSSSIL	267	283	3	14	13.26	0.604	0.561	0.684	4.318	4.005	4.885	0.719	0.654	0.623	5.137	4.674	4.452	0.76	0.858	0.891	5.428	6.13	6.363
PI3Kd_Y685A_idelalisib	HSGLTPHLTMVHSSSILA	267	284	3	15	12.55	0.704	0.588	0.645	4.694	3.921	4.298	0.768	0.721	0.686	5.118	4.807	4.571	0.951	1.148	1.078	6.339	7.652	7.186
PI3Kd_Y685A_idelalisib	TMVHSSSIL	275	283	2	7	11.22	0.028	-0.008	0.04	0.403	-0.115	0.57	0.119	0.079	0.048	1.701	1.135	0.69	0	0.459	0.401	0	6.559	5.723
PI3Kd_Y685A_idelalisib	VHSSSIL	277	283	1	5	8.93	0.157	0.249	0.154	3.138	4.984	3.073	0.227	0.233	0.107	4.539	4.658	2.145	0.297	0.489	0.517	5.93	9.785	10.331
PI3Kd_Y685A_idelalisib	RDEQSNPAPQVQKPRAKPPPIPAKKPSSVSL	286	316	5	21	6.6	13.791	13.622	14.235	65.67	64.866	67.785	14.393	13.824	14.139	68.538	65.827	67.331	13.609	14.305	14.403	64.806	68.117	68.585
PI3Kd_Y685A_idelalisib	PQVQKPRAKPPPIPAKKPSSVSL	294	316	4	15	6.83	11.022	11.439	11.719	73.482	76.262	78.125	11.506	11.432	11.222	76.707	76.213	74.814	10.449	12.123	11.937	69.661	80.818	79.58
PI3Kd_Y685A_idelalisib	WSLEQPFRIEL	317	327	2	8	21.01	0.771	0.725	1.037	9.642	9.065	12.961	1.264	1.171	1.195	15.804	14.639	14.939	2.045	1.942	1.889	25.56	24.278	23.615
PI3Kd_Y685A_idelalisib	IQGSKVNADE	328	337	2	8	2.02	0.933	0.665	0.852	11.659	8.313	10.655	2.662	2.342	2.384	33.271	29.274	29.805	3.537	3.87	3.859	44.208	48.377	48.234
PI3Kd_Y685A_idelalisib	FDYKDQLKTGERCL	426	439	3	12	12.94	1.866	1.981	1.988	15.547	16.508	16.563	3.317	3.14	3.274	27.645	26.168	27.283	3.689	3.758	3.886	30.746	31.319	32.38
PI3Kd_Y685A_idelalisib	YKDQLKTGERC	428	438	3	9	3.77	3.237	3.109	0	35.966	34.545	0	4.573	4.21	4.067	50.807	46.78	45.191	4.593	5.242	5.31	51.031	58.248	59.005
PI3Kd_Y685A_idelalisib	LNPTGTVRSNPNTDSAAAL	453	471	2	15	9.32	4.056	3.711	3.861	27.042	24.74	25.739	6.661	5.979	5.897	44.404	39.858	39.315	7.607	8.03	8.323	50.717	53.535	55.486
PI3Kd_Y685A_idelalisib	ICLPEVAPHPVYY	473	485	2	8	17.07	3.305	3.386	3.857	41.317	42.319	48.217	4.353	4.343	4.25	54.412	54.286	53.13	5.39	5.286	5.295	67.375	66.077	66.19
PI3Kd_Y685A_idelalisib	ICLPEVAPHPVYYPAL	473	488	2	10	18.9	2.789	2.521	2.836	27.892	25.208	28.36	3.79	3.863	3.708	37.895	38.629	37.082	5.116	5.337	5.364	51.164	53.37	53.642
PI3Kd_Y685A_idelalisib	PEVAPHPVYYPAL	476	488	2	8	15.6	1.096	0.582	1.04	13.696	7.28	12.998	2.073	2.088	2.518	25.911	26.097	31.476	0	2.183	2.293	0	27.286	28.668
PI3Kd_Y685A_idelalisib	EKILEL	489	494	1	4	14.67	0.033	0.084	-0.033	0.814	2.095	-0.821	0.125	0.143	0.054	3.122	3.563	1.357	0.096	0.781	0.712	2.392	19.535	17.794
PI3Kd_Y685A_idelalisib	EKILELGRHSE	489	499	3	9	7.81	0.306	0.257	0.298	3.4	2.851	3.308	0.778	0.687	0.668	8.645	7.631	7.424	0	1.689	1.766	0	18.765	19.625
PI3Kd_Y685A_idelalisib	EKILELGRHSEC	489	500	2	10	8.68	0.749	0.742	0.886	7.491	7.421	8.863	1.257	1.125	1.064	12.573	11.247	10.64	1.835	2.134	2.16	18.353	21.34	21.597
PI3Kd_Y685A_idelalisib	EKILELGRHSECVHVTE	489	505	2	15	9.61	2.599	2.473	2.629	17.324	16.484	17.528	3.185	3.029	2.942	21.233	20.191	19.616	4.044	4.367	4.278	26.963	29.112	28.521
PI3Kd_Y685A_idelalisib	EKILELGRHSECVHVTEE	489	506	2	16	9.66	2.797	2.6	2.829	17.482	16.251	17.679	3.479	3.029	3.208	21.743	18.932	20.051	0	4.705	4.803	0	29.404	30.016
PI3Kd_Y685A_idelalisib	EKILELGRHSECVHVTEEEQ	489	508	3	18	9.56	2.966	2.722	2.945	16.478	15.123	16.361	3.699	3.487	3.382	20.551	19.371	18.788	4.934	5.593	5.401	27.413	31.072	30.007
PI3Kd_Y685A_idelalisib	KILELGRHSEC	490	500	2	9	7.53	0.604	0.462	0.756	6.711	5.133	8.404	0.837	0.782	0.876	9.302	8.686	9.73	1.303	1.869	1.776	14.478	20.763	19.728
PI3Kd_Y685A_idelalisib	LGRHSECVHVTE	494	505	3	10	4.19	2.763	2.738	2.846	27.625	27.378	28.462	3.181	2.94	2.909	31.812	29.405	29.088	0	3.433	3.812	0	34.332	38.119
PI3Kd_Y685A_idelalisib	LGRHSECVHVTEE	494	506	3	11	4.35	3.028	2.894	2.956	27.523	26.309	26.869	3.572	3.307	3.295	32.468	30.062	29.957	3.44	3.844	4.07	31.277	34.949	37.003
PI3Kd_Y685A_idelalisib	LGRHSECVHVTEEEQ	494	508	3	13	4.52	2.986	2.903	3.118	22.968	22.328	23.982	3.653	3.377	3.249	28.096	25.974	24.989	4.123	4.684	4.788	31.718	36.03	36.829
PI3Kd_Y685A_idelalisib	GRHSECVHVTEE	495	506	3	10	3.31	3.112	3.219	4.115	31.123	32.19	41.153	3.761	3.349	3.495	37.608	33.49	34.953	3.754	4.694	4.084	37.54	46.941	40.836
PI3Kd_Y685A_idelalisib	CVHVTEEEQ	500	508	2	7	3.78	2.206	2.07	2.145	31.511	29.573	30.645	2.842	2.588	2.558	40.595	36.968	36.538	3.493	3.883	4.122	49.902	55.471	58.889
PI3Kd_Y685A_idelalisib	VHVTEE	501	506	1	4	2.22	1.929	1.884	1.842	48.224	47.093	46.059	2.333	2.153	1.986	58.32	53.826	49.659	2.554	2.849	2.848	63.849	71.219	71.206
PI3Kd_Y685A_idelalisib	VHVTEEEQ	501	508	1	6	2.54	1.914	1.796	1.786	31.898	29.938	29.767	2.46	2.278	0	41.001	37.969	0	3.354	3.616	3.674	55.901	60.272	61.229
PI3Kd_Y685A_idelalisib	VHVTEEEQLQL	501	511	2	9	13.45	1.19	1.094	1.121	13.221	12.151	12.461	1.856	1.62	1.566	20.623	18.005	17.399	0	4.205	4.387	0	46.724	48.741
PI3Kd_Y685A_idelalisib	REILERRGSGEL	512	523	2	10	7.32	2.68	2.578	2.76	26.8	25.785	27.603	3.264	3.027	2.878	32.638	30.275	28.783	2.742	3.277	3.436	27.423	32.772	34.362
PI3Kd_Y685A_idelalisib	YEHEKDLVWKLRHEVQEHFPEALARL	524	549	4	23	18.97	0.779	0.566	0.558	3.388	2.46	2.424	1.556	1.538	1.253	6.764	6.688	5.447	2.514	2.889	2.501	10.932	12.559	10.873
PI3Kd_Y685A_idelalisib	HEKDLVWKLRHEVQEHFPEAL	526	546	4	18	17.61	0.527	0.366	0.498	2.929	2.032	2.769	1.919	1.268	1.262	10.661	7.044	7.013	0	2.211	2.106	0	12.283	11.698
PI3Kd_Y685A_idelalisib	LLVTKWNKHEDVAQM	550	564	2	13	11.35	0	0.23	0	0	1.766	0	0.601	0	1.007	4.626	0	7.75	0	0.852	0.756	0	6.557	5.816
PI3Kd_Y685A_idelalisib	LLVTKWNKHEDVAQML	550	565	3	14	15.35	0.02	0.007	0.007	0.146	0.05	0.053	0.285	0.165	0.135	2.039	1.181	0.964	0	0.654	0.349	0	4.674	2.491
PI3Kd_Y685A_idelalisib	CSWPEL	569	574	1	3	19.09	0.029	-0.022	0.039	0.961	-0.736	1.294	0.559	0.487	0.596	18.637	16.228	19.881	0	1.311	1.241	0	43.688	41.38
PI3Kd_Y685A_idelalisib	LDFSFPDCHVGSF	583	595	2	10	20.72	0.714	0.508	0.792	7.139	5.075	7.916	1.755	1.603	1.727	17.551	16.028	17.267	3.095	3.347	3.35	30.95	33.469	33.499
PI3Kd_Y685A_idelalisib	FSFPDCHVGSF	585	595	2	8	19.41	0.407	0.613	0.297	5.092	7.666	3.718	0.889	0.888	0.706	11.116	11.097	8.824	0	2.124	2.067	0	26.547	25.835
PI3Kd_Y685A_idelalisib	AIKSLRKLTDDEL	596	608	2	11	11.26	0.755	0.601	0.881	6.862	5.463	8.007	1.233	1.153	0.867	11.206	10.485	7.878	2.222	2.002	1.683	20.199	18.197	15.3
PI3Kd_Y685A_idelalisib	FQYLLQ	609	614	1	4	16.86	0.093	0.131	0.053	2.336	3.275	1.334	0.031	0.025	0.019	0.769	0.633	0.486	0	0.069	0.13	0	1.732	3.259
PI3Kd_Y685A_idelalisib	LVQVLKYESYL	615	625	2	9	18.4	1.093	0.892	1.089	12.146	9.906	12.094	1.896	1.91	1.869	21.072	21.218	20.764	2.251	2.658	2.647	25.006	29.535	29.414
PI3Kd_Y685A_idelalisib	VQVLKYESY	616	624	2	7	11.98	1.087	0.937	0.974	15.522	13.382	13.911	1.83	1.664	1.613	26.143	23.777	23.048	0	1.851	1.879	0	26.436	26.842
PI3Kd_Y685A_idelalisib	VQVLKYESYL	616	625	2	8	16.62	1.075	0.974	1.033	13.437	12.17	12.91	1.881	1.837	1.824	23.512	22.966	22.806	2.377	2.562	2.45	29.716	32.027	30.626
PI3Kd_Y685A_idelalisib	VQVLKYESYLDC	616	627	2	10	16.74	1.887	1.278	1.095	18.872	12.777	10.954	1.886	1.716	1.733	18.862	17.156	17.327	2.927	3.353	3.159	29.272	33.533	31.588
PI3Kd_Y685A_idelalisib	ELTKFLL	628	634	2	5	18.5	0	0	0	0	0	0	0	0	0	0	0	0	0	0	0	0	0	0
PI3Kd_Y685A_idelalisib	ELTKFLLDRALANRKIGHFL	628	647	3	18	16.98	0.062	0.107	0.029	0.342	0.593	0.162	0.2	0.139	0.11	1.109	0.771	0.609	0.198	0.345	0.27	1.1	1.916	1.502
PI3Kd_Y685A_idelalisib	LTKFLLDRALANRKIGHF	629	646	3	16	13.71	0.276	0.176	0.103	1.724	1.102	0.643	0.23	0.279	0.148	1.44	1.746	0.927	0.383	0.307	0.253	2.395	1.919	1.583
PI3Kd_Y685A_idelalisib	TKFLLD	630	635	1	4	13.76	0.008	0.001	0.025	0.204	0.031	0.634	-0.004	-0.01	-0.004	-0.104	-0.238	-0.092	-0.008	-0.047	0.008	-0.21	-1.179	0.191
PI3Kd_Y685A_idelalisib	TKFLLDRALANRKIGHF	630	646	3	15	13.14	0.058	0.067	0.117	0.389	0.448	0.779	0.318	0.251	0.217	2.12	1.672	1.445	0.39	0.52	0.549	2.601	3.468	3.66
PI3Kd_Y685A_idelalisib	TKFLLDRALANRKIGHFL	630	647	3	16	15.42	0	0.168	0.549	0	1.047	3.429	0.648	0.271	0.12	4.048	1.693	0.751	0.3	0.384	0.245	1.872	2.402	1.53
PI3Kd_Y685A_idelalisib	LLDRALANRKIGHF	633	646	3	12	10.44	0.109	0.097	0.157	0.908	0.812	1.312	0.302	0.246	0.228	2.514	2.049	1.903	0.407	0.585	0.575	3.392	4.871	4.791
PI3Kd_Y685A_idelalisib	LLDRALANRKIGHFL	633	647	2	13	13.01	0.083	0.08	0.053	0.637	0.614	0.404	0.147	0.09	0.109	1.128	0.692	0.836	0.172	0.248	0.196	1.319	1.908	1.51
PI3Kd_Y685A_idelalisib	LLDRALANRKIGHFLFWHL	633	651	4	17	18.75	0.211	0.057	0	1.244	0.334	0	0.121	0	0.09	0.711	0	0.528	0	0.157	0.2	0	0.921	1.178
PI3Kd_Y685A_idelalisib	DRALANRKIGHF	635	646	3	10	7.15	0	0.062	0.085	-0.004	0.623	0.855	0.339	0.227	0.118	3.389	2.273	1.183	0.43	0.603	0.509	4.305	6.034	5.087
PI3Kd_Y685A_idelalisib	RALANRKIGHF	636	646	2	9	5.67	0.191	0.015	0.028	2.121	0.169	0.316	0.319	0.212	0.164	3.54	2.353	1.825	0.272	0.225	0.308	3.018	2.496	3.423
PI3Kd_Y685A_idelalisib	LFWHLRSEM	647	655	2	7	17.01	0.151	0.11	0.029	2.156	1.575	0.413	0.059	0.105	0.046	0.846	1.494	0.656	0	0	0.126	0	0	1.795
PI3Kd_Y685A_idelalisib	FWHLRSEM	648	655	2	6	14.83	-0.182	-0.11	-0.109	-3.04	-1.827	-1.817	0	-0.158	-0.217	0	-2.642	-3.615	-0.183	-0.105	-0.122	-3.056	-1.743	-2.032
PI3Kd_Y685A_idelalisib	RSEMHVPSVA	652	661	2	7	8.26	0.963	0.95	1.713	13.751	13.57	24.469	1.037	1.065	0.942	14.82	15.211	13.462	0	1.671	1.644	0	23.874	23.483
PI3Kd_Y685A_idelalisib	HVPSVA	656	661	1	3	3.15	0.791	0.797	0.816	26.379	26.557	27.195	0.889	0.823	0.93	29.625	27.446	30.999	1.105	1.154	1.169	36.832	38.475	38.96
PI3Kd_Y685A_idelalisib	LRFGLIL	662	668	2	5	20.81	-0.024	0	-0.163	-0.489	0	-3.267	0	0.015	-0.001	0	0.295	-0.018	0.013	-0.027	-0.007	0.264	-0.533	-0.132
PI3Kd_Y685A_idelalisib	LRFGLILE	662	669	2	6	19.96	0.041	0.005	-0.02	0.688	0.076	-0.338	0.04	0.017	-0.027	0.673	0.291	-0.447	0	0.038	0.006	0	0.629	0.102
PI3Kd_Y685A_idelalisib	LRFGLILEA	662	670	2	7	20.34	-0.092	-0.097	0.027	-1.314	-1.382	0.382	0.06	0.035	0.04	0.858	0.505	0.578	0.049	0.093	0.027	0.706	1.334	0.392
PI3Kd_Y685A_idelalisib	RFGLIL	663	668	1	4	19.79	0.022	-0.022	-0.008	0.538	-0.558	-0.2	0	0.027	0.018	0	0.677	0.451	0	0	-0.014	0	0	-0.339
PI3Kd_Y685A_idelalisib	EAYCRGSTHHMKVL	669	682	3	12	6.03	0.18	0.052	0.276	1.502	0.434	2.299	0.379	0	0.473	3.16	0	3.944	0	0	1.357	0	0	11.309
PI3Kd_Y685A_idelalisib	YCRGSTHHMKVLM	671	683	3	11	6.5	0.145	-0.161	0.298	1.318	-1.466	2.71	0.482	0.322	0.347	4.386	2.927	3.159	0.829	0	0	7.537	0	0
PI3Kd_Y685A_idelalisib	MKQGEALSKL	683	692	2	8	9.19	0.333	0.285	0.325	4.157	3.557	4.067	0.295	0.165	0.204	3.682	2.063	2.545	0	0	0.641	0	0	8.012
PI3Kd_Y685A_idelalisib	KQGEALSKL	684	692	2	7	7.58	0.068	0.024	0.04	0.971	0.348	0.566	0.104	0.072	0.107	1.486	1.034	1.535	0.313	0.342	0.326	4.47	4.886	4.661
PI3Kd_Y685A_idelalisib	KQGEALSKLKALND	684	697	3	12	8.77	0.238	0.137	0.187	1.983	1.14	1.556	0.235	0.2	0.171	1.96	1.666	1.428	0.451	0.535	0.46	3.758	4.462	3.834
PI3Kd_Y685A_idelalisib	LSKLKALND	689	697	2	7	6.54	0.226	0.129	0.142	3.233	1.842	2.028	0.215	0.183	0.145	3.064	2.616	2.073	0.411	0.157	0.192	5.866	2.237	2.746
PI3Kd_Y685A_idelalisib	SKLKALND	690	697	2	6	3.65	0.135	0.072	0.071	2.243	1.205	1.182	0.137	0.125	0.088	2.277	2.081	1.473	0.106	0.085	0.09	1.763	1.414	1.507
PI3Kd_Y685A_idelalisib	SKLKALNDF	690	698	2	7	11.81	0.1	0.092	0.079	1.43	1.315	1.13	0.086	0.082	0.068	1.227	1.168	0.968	0.035	0.208	0.075	0.494	2.967	1.072
PI3Kd_Y685A_idelalisib	FVKLSSQKTPKPQTKE	698	713	2	12	4.11	3.247	3.097	3.237	27.057	25.81	26.977	5.409	5.075	5.2	45.074	42.291	43.332	5.712	6.172	6.173	47.602	51.432	51.445
PI3Kd_Y685A_idelalisib	FVKLSSQKTPKPQTKE	698	713	3	12	4.11	3.162	2.97	3.345	26.348	24.753	27.872	5.525	5.078	5.142	46.038	42.313	42.852	5.616	6.177	6.23	46.804	51.476	51.919
PI3Kd_Y685A_idelalisib	FVKLSSQKTPKPQTKELMHL	698	717	4	16	9.92	1.998	1.76	2.061	12.485	10.998	12.881	3.143	2.898	2.891	19.646	18.112	18.069	3.637	3.911	4.173	22.73	24.446	26.082
PI3Kd_Y685A_idelalisib	FVKLSSQKTPKPQTKELMHLCM	698	719	3	18	12.79	1.753	1.61	1.729	9.74	8.944	9.607	2.733	2.475	2.428	15.185	13.748	13.49	3.06	0	3.592	17.002	0	19.953
PI3Kd_Y685A_idelalisib	VKLSSQKTPKPQTKE	699	713	3	11	1.8	3.588	3.26	3.471	32.619	29.636	31.557	5.868	5.518	5.5	53.349	50.164	49.997	6.147	6.201	6.814	55.878	56.377	61.946
PI3Kd_Y685A_idelalisib	VKLSSQKTPKPQTKE	699	713	4	11	1.8	3.482	3.345	3.738	31.652	30.408	33.979	5.936	5.6	5.638	53.962	50.91	51.253	6.226	6.628	6.559	56.601	60.253	59.631
PI3Kd_Y685A_idelalisib	RQEAYL	720	725	1	4	9.21	1.362	1.356	1.377	34.038	33.911	34.421	1.632	1.54	1.538	40.809	38.505	38.443	2.436	2.644	2.633	60.908	66.089	65.823
PI3Kd_Y685A_idelalisib	RQEAYLEA	720	727	2	6	8.96	1.509	1.433	1.468	25.157	23.881	24.463	2.872	2.706	2.685	47.862	45.096	44.746	0	4.058	4.115	0	67.642	68.583
PI3Kd_Y685A_idelalisib	EALSHLQSPLDPSTL	726	740	2	11	15.63	0.297	0.23	0.25	2.703	2.09	2.273	1.027	0.95	0.934	9.333	8.632	8.487	2.55	2.571	2.553	23.185	23.37	23.205
PI3Kd_Y685A_idelalisib	EALSHLQSPLDPSTLL	726	741	2	12	18.61	0.27	0.196	0.248	2.248	1.633	2.068	1.044	0.913	0.957	8.697	7.605	7.972	2.429	2.554	2.538	20.24	21.286	21.15
PI3Kd_Y685A_idelalisib	LSHLQSPLDPSTL	728	740	2	9	14.61	0.303	0.231	0.231	3.363	2.567	2.562	1.106	0.964	0.933	12.288	10.71	10.37	2.479	2.584	2.585	27.541	28.707	28.724
PI3Kd_Y685A_idelalisib	LSHLQSPLDPSTLL	728	741	2	10	18.16	0.278	0.22	0.219	2.78	2.197	2.186	1.007	0.917	0.872	10.073	9.167	8.717	2.502	2.578	2.575	25.021	25.777	25.75
PI3Kd_Y685A_idelalisib	LAEVCVE	741	747	1	5	9.97	1.154	1.118	1.166	23.083	22.365	23.327	1.746	1.722	1.727	34.912	34.445	34.531	2.079	1.986	1.942	41.587	39.711	38.843
PI3Kd_Y685A_idelalisib	VCVEQCTF	744	751	1	6	15.13	1.32	1.227	1.17	21.993	20.447	19.503	2.64	2.517	2.29	44.001	41.955	38.167	2.761	3.298	3.206	46.021	54.964	53.43
PI3Kd_Y685A_idelalisib	MDSKMKPLW	752	760	2	6	15.04	1.025	0.978	0.981	17.084	16.294	16.347	1.063	1.016	0.952	17.718	16.927	15.86	1.152	1.532	1.436	19.207	25.531	23.927
PI3Kd_Y685A_idelalisib	MDSKMKPLWIM	752	762	2	8	19.31	0.786	0.764	0.884	9.831	9.55	11.049	0.884	0.814	0.764	11.049	10.179	9.554	0	1.035	1.073	0	12.936	13.411
PI3Kd_Y685A_idelalisib	DSKMKPLW	753	760	2	5	14.85	0.861	0.808	0.828	17.227	16.167	16.567	0.92	0.863	0.799	18.391	17.263	15.974	0	1.308	1.202	0	26.164	24.046
PI3Kd_Y685A_idelalisib	DSKMKPLWIM	753	762	3	7	19.37	0.714	0.728	0.641	10.196	10.4	9.158	0.803	0.737	0.671	11.474	10.535	9.593	0.731	1.047	1.031	10.441	14.958	14.736
PI3Kd_Y685A_idelalisib	IMYSNE	761	766	1	4	6.46	1.373	1.332	1.437	34.316	33.292	35.925	1.627	1.479	1.527	40.686	36.972	38.184	0	0	2.239	0	0	55.969
PI3Kd_Y685A_idelalisib	YSNEEAGSGGSVGIIFKNGDDLRQDM	763	788	3	24	16.81	4.332	3.957	4.065	18.048	16.487	16.938	6.36	5.889	5.628	26.5	24.539	23.45	7.428	8.006	7.689	30.951	33.359	32.036
PI3Kd_Y685A_idelalisib	EAGSGGSVGIIFKNGDDL	767	784	2	16	16.49	2.018	1.85	0	12.612	11.563	0	2.647	2.477	2.393	16.547	15.482	14.957	3.109	3.664	3.635	19.434	22.903	22.72
PI3Kd_Y685A_idelalisib	EAGSGGSVGIIFKNGDDLRQDM	767	788	2	20	16.38	2.252	2.016	2.354	11.26	10.08	11.771	4.358	4.144	4.068	21.79	20.72	20.338	0	6.441	6.248	0	32.203	31.242
PI3Kd_Y685A_idelalisib	EAGSGGSVGIIFKNGDDLRQDMLT	767	790	3	22	17.66	1.973	1.928	1.888	8.967	8.764	8.581	4.055	3.758	3.419	18.431	17.082	15.543	5.676	5.651	5.829	25.798	25.688	26.494
PI3Kd_Y685A_idelalisib	MDVLWKQEGLD	797	807	2	9	16.19	0.126	0.103	0.091	1.404	1.144	1.011	0	0.353	0.352	0	3.923	3.906	0	0	0.94	0	0	10.442
PI3Kd_Y685A_idelalisib	MDVLWKQEGLDL	797	808	2	10	19.55	0.106	0.071	0.086	1.062	0.711	0.861	0.297	0.269	0.297	2.967	2.69	2.97	0	0	0.753	0	0	7.529
PI3Kd_Y685A_idelalisib	DVLWKQEGLDL	798	808	2	9	18.63	0.046	0.003	0.167	0.514	0.033	1.851	0.309	0.221	0.236	3.431	2.46	2.62	0.766	0.933	0.852	8.516	10.372	9.466
PI3Kd_Y685A_idelalisib	VLWKQEGLDL	799	808	2	8	17.63	0.101	0.072	0.192	1.258	0.894	2.397	0.341	0.296	0.252	4.268	3.699	3.156	0	0.91	0.898	0	11.374	11.219
PI3Kd_Y685A_idelalisib	WKQEGLD	801	807	2	5	8.15	0.107	0.062	0.071	2.134	1.23	1.425	0.46	0.358	0.379	9.207	7.162	7.577	0	1.183	1.272	0	23.664	25.449
PI3Kd_Y685A_idelalisib	WKQEGLDL	801	808	2	6	14.9	0.063	-0.007	0.14	1.058	-0.118	2.34	0.412	0.25	0.213	6.869	4.171	3.55	0	0.881	0.884	0	14.689	14.733
PI3Kd_Y685A_idelalisib	LRMTPYGCLPTGDRTGL	808	824	3	13	15.28	0.583	0.415	0.472	4.485	3.189	3.632	0.652	0.569	0.513	5.019	4.374	3.95	0	1.211	1.107	0	9.316	8.515
PI3Kd_Y685A_idelalisib	LRMTPYGCLPTGDRTGLIE	808	826	3	15	16	0.527	0.419	0.474	3.512	2.793	3.16	0	0.543	0.515	0	3.618	3.433	0	1.183	1.08	0	7.884	7.2
PI3Kd_Y685A_idelalisib	RMTPYGCLPTGDRTGL	809	824	3	12	13.91	0.549	0.432	0.529	4.576	3.603	4.411	0.687	0.587	0.584	5.725	4.89	4.866	0	0.611	0.945	0	5.088	7.874
PI3Kd_Y685A_idelalisib	RMTPYGCLPTGDRTGLIE	809	826	3	14	14.7	0.606	0.426	0.543	4.331	3.045	3.879	0.706	0.617	0.605	5.042	4.41	4.321	0	1.111	1.062	0	7.935	7.588
PI3Kd_Y685A_idelalisib	TPYGCLPTGDRTGLIE	811	826	2	13	14.73	0.688	0.589	0.774	5.291	4.534	5.954	0.996	0.689	0.63	7.661	5.298	4.849	0.785	1.285	1.119	6.04	9.881	8.609
PI3Kd_Y685A_idelalisib	VVLRSDTIA	827	835	1	7	8.22	1.012	0.983	0.954	14.462	14.039	13.628	1.676	1.593	1.572	23.94	22.761	22.455	0	2.103	2.074	0	30.044	29.635
PI3Kd_Y685A_idelalisib	VVLRSDTIA	827	835	2	7	8.22	1.017	0.947	0.969	14.533	13.531	13.847	1.687	1.563	1.573	24.104	22.329	22.473	2.009	2.077	2.063	28.706	29.67	29.467
PI3Kd_Y685A_idelalisib	VVLRSDTIAN	827	836	1	8	6.94	1.089	1.03	1.007	13.609	12.881	12.593	1.505	1.692	1.644	18.813	21.15	20.556	2.083	2.287	2.241	26.039	28.582	28.018
PI3Kd_Y685A_idelalisib	VVLRSDTIAN	827	836	2	8	6.94	1.07	1.007	0.961	13.369	12.584	12.015	1.736	1.653	1.637	21.698	20.66	20.458	2.087	2.215	2.231	26.094	27.684	27.888
PI3Kd_Y685A_idelalisib	VVLRSDTIANIQL	827	839	2	11	16.8	0.996	0.915	0.941	9.056	8.32	8.551	1.941	1.808	1.798	17.648	16.439	16.341	2.965	3.294	3.172	26.959	29.946	28.836
PI3Kd_Y685A_idelalisib	VLRSDTIANIQL	828	839	2	10	16.35	0.084	0.001	0.232	0.841	0.008	2.318	0.632	0.552	0.787	6.318	5.518	7.87	1.255	1.709	1.569	12.548	17.094	15.688
PI3Kd_Y685A_idelalisib	RSDTIANIQL	830	839	2	8	15.21	0.141	0.103	0.085	1.763	1.286	1.065	0.476	0.449	0.436	5.952	5.615	5.447	1.36	1.453	1.393	17	18.164	17.41
PI3Kd_Y685A_idelalisib	IANIQL	834	839	1	4	14.45	0.072	0.068	-0.01	1.789	1.688	-0.246	0.333	0.364	0.319	8.315	9.11	7.965	1.262	1.303	1.254	31.539	32.579	31.357
PI3Kd_Y685A_idelalisib	AATAAFNKDAL	845	855	2	9	10.88	6.063	6.003	5.913	67.364	66.7	65.702	7.201	7.032	6.847	80.015	78.136	76.078	6.684	7.247	7.203	74.266	80.518	80.033
PI3Kd_Y685A_idelalisib	AATAAFNKDALL	845	856	2	10	14.33	5.652	5.494	5.289	56.517	54.937	52.891	6.754	6.598	6.056	67.544	65.976	60.556	6.509	6.991	7.186	65.095	69.91	71.865
PI3Kd_Y685A_idelalisib	AATAAFNKDALLNWLKSKNPGEAL	845	868	4	21	19.18	6.74	6.605	6.977	32.093	31.451	33.224	9.706	9.344	9.486	46.217	44.497	45.169	0	11.326	11.368	0	53.932	54.132
PI3Kd_Y685A_idelalisib	FNKDALL	850	856	2	5	12.91	1.778	1.606	1.779	35.551	32.125	35.581	2.712	2.616	2.534	54.235	52.323	50.672	2.61	2.879	2.878	52.21	57.574	57.56
PI3Kd_Y685A_idelalisib	FNKDALLNWLKSKNPGEAL	850	868	3	16	18.94	4.065	3.835	4.161	25.405	23.971	26.004	6.666	6.652	6.483	41.661	41.577	40.519	0	8.367	8.332	0	52.291	52.076
PI3Kd_Y685A_idelalisib	FNKDALLNWLKSKNPGEALDRAIEE	850	874	4	22	19.72	4.292	4.077	4.036	19.508	18.531	18.343	7.926	7.812	7.672	36.029	35.511	34.872	0	9.72	9.714	0	44.18	44.154
PI3Kd_Y685A_idelalisib	NKDALL	851	856	1	4	9.27	0.998	0.883	0.948	24.941	22.076	23.694	1.338	1.732	1.867	33.456	43.301	46.664	0	2.06	2.052	0	51.49	51.312
PI3Kd_Y685A_idelalisib	NKDALLNWLKSKNPGEAL	851	868	3	15	17.73	3.137	3.021	3.121	20.91	20.139	20.808	5.646	5.517	5.453	37.64	36.78	36.352	6.885	7.242	7.242	45.898	48.277	48.278
PI3Kd_Y685A_idelalisib	NKDALLNWLKSKNPGEALDRAIEE	851	874	4	21	18.6	3.479	3.31	3.315	16.568	15.764	15.787	0	6.32	6.608	0	30.093	31.469	0	8.756	8.88	0	41.697	42.285
PI3Kd_Y685A_idelalisib	LNWLKSKNPGEAL	856	868	3	10	14.14	2.343	2.289	2.225	23.426	22.888	22.254	3.715	3.688	3.5	37.146	36.881	35.004	3.898	4.218	4.233	38.982	42.184	42.333
PI3Kd_Y685A_idelalisib	LNWLKSKNPGEALDRAIEE	856	874	3	16	15.5	2.817	2.543	2.442	17.606	15.894	15.262	4.877	4.759	4.539	30.481	29.742	28.368	5.691	5.028	4.888	35.568	31.423	30.552
PI3Kd_Y685A_idelalisib	NWLKSKNPGEAL	857	868	2	9	12.34	2.399	2.241	2.336	26.654	24.904	25.957	3.737	3.598	3.537	41.518	39.976	39.301	0	4.071	4.205	0	45.229	46.725
PI3Kd_Y685A_idelalisib	NWLKSKNPGEALDRA	857	871	3	12	10.8	2.776	2.605	2.714	23.134	21.709	22.618	4.927	4.886	4.701	41.059	40.72	39.179	5.243	5.486	5.433	43.689	45.719	45.276
PI3Kd_Y685A_idelalisib	NWLKSKNPGEALDRAIEE	857	874	3	15	14.28	2.771	2.346	2.493	18.474	15.642	16.622	4.724	4.228	3.782	31.492	28.189	25.214	5.735	5.923	5.579	38.23	39.486	37.193
PI3Kd_Y685A_idelalisib	DRAIEE	869	874	1	4	2.61	0.003	-0.005	0.004	0.066	-0.116	0.107	0.069	-0.017	-0.021	1.724	-0.422	-0.516	-0.009	0.034	0.036	-0.213	0.846	0.892
PI3Kd_Y685A_idelalisib	DRAIEEF	869	875	2	5	11.84	0.03	0.024	-0.01	0.591	0.478	-0.206	-0.002	-0.01	-0.043	-0.044	-0.208	-0.855	-0.05	-0.038	0.053	-1.009	-0.77	1.065
PI3Kd_Y685A_idelalisib	FTLSCAG	875	881	1	5	13.22	0.031	0.016	-0.004	0.623	0.318	-0.09	0.019	0.017	0.012	0.379	0.342	0.239	0	0.03	0.015	0	0.594	0.304
PI3Kd_Y685A_idelalisib	FTLSCAGY	875	882	1	6	17.1	-0.046	0.012	0.006	-0.763	0.201	0.097	-0.047	0.026	-0.045	-0.791	0.436	-0.751	0	0.01	-0.031	0	0.162	-0.512
PI3Kd_Y685A_idelalisib	TLSCAG	876	881	1	4	4.44	0.23	0.17	0.005	5.74	4.239	0.119	0.049	0.173	0.001	1.22	4.337	0.018	-0.012	0.094	0.204	-0.298	2.346	5.106
PI3Kd_Y685A_idelalisib	TYVLGIGDRHSDN	886	898	2	11	10.73	0.432	0.39	0.47	3.93	3.549	4.27	1.106	0.851	1.278	10.055	7.736	11.616	1.232	1.355	1.506	11.202	12.323	13.689
PI3Kd_Y685A_idelalisib	YVLGIGDRHSDN	887	898	3	10	9.91	0.383	0.326	0.41	3.827	3.259	4.099	1.08	0.956	0.86	10.8	9.564	8.597	0	1.332	1.382	0	13.319	13.824
PI3Kd_Y685A_idelalisib	YVLGIGDRHSDNIM	887	900	3	12	14.35	0.223	0.16	0.151	1.858	1.337	1.258	0.69	0.599	0.571	5.747	4.991	4.756	0	0.86	0.945	0	7.17	7.872
PI3Kd_Y685A_idelalisib	IRESGQL	901	907	2	5	5.43	0.16	0.102	0.098	3.2	2.041	1.959	0.471	0.387	0.386	9.427	7.741	7.727	0.77	0.879	0.9	15.397	17.578	17.999
PI3Kd_Y685A_idelalisib	IRESGQLFHIDF	901	912	3	10	19.1	0.112	0.096	0.089	1.121	0.96	0.885	0.153	0.108	0.13	1.526	1.078	1.299	0	0.336	0.28	0	3.364	2.804
PI3Kd_Y685A_idelalisib	IRESGQLFHIDFGHF	901	915	3	13	19.25	0.359	0.304	0.345	2.763	2.335	2.655	1.111	1.023	0.947	8.547	7.866	7.283	0	1.28	1.288	0	9.848	9.909
PI3Kd_Y685A_idelalisib	IRESGQLFHIDFGHFLGNF	901	919	4	17	20.78	1.618	1.33	1.569	9.518	7.825	9.232	3.443	3.369	3.275	20.255	19.82	19.265	3.981	4.213	4.188	23.42	24.784	24.636
PI3Kd_Y685A_idelalisib	FHIDFGHF	908	915	1	6	18.5	0.324	0.244	0.325	5.398	4.061	5.417	1.086	1.014	0.976	18.102	16.899	16.274	0	1.21	1.209	0	20.17	20.144
PI3Kd_Y685A_idelalisib	FHIDFGHFLGNF	908	919	3	10	20.9	1.488	1.264	1.264	14.884	12.639	12.637	3.305	2.931	2.995	33.054	29.307	29.955	3.682	3.938	3.939	36.815	39.383	39.389
PI3Kd_Y685A_idelalisib	HIDFGHF	909	915	2	5	14.46	0.325	0.282	0.146	6.493	5.64	2.919	1.188	1.062	1.079	23.756	21.238	21.578	1.066	1.393	1.337	21.329	27.868	26.74
PI3Kd_Y685A_idelalisib	HIDFGHFLGNF	909	919	2	9	20.35	1.721	1.229	2.146	19.125	13.652	23.845	3.442	3.589	3.089	38.247	39.882	34.323	3.789	4.206	4.034	42.102	46.732	44.824
PI3Kd_Y685A_idelalisib	LGNFKTKFGINRERVPFIL	916	934	4	16	16.87	3.292	2.889	3.536	20.577	18.057	22.099	4.618	3.872	3.638	28.863	24.202	22.736	5.182	5.993	5.249	32.387	37.458	32.807
PI3Kd_Y685A_idelalisib	RERVPFIL	927	934	2	5	16.95	0.598	0.46	0.468	11.954	9.208	9.356	1.478	1.428	1.322	29.551	28.552	26.444	2.377	2.669	2.555	47.541	53.379	51.106
PI3Kd_Y685A_idelalisib	YDFVHVIQQGKTNNSEKF	936	953	3	16	13.94	4.158	3.939	3.722	25.99	24.62	23.264	4.88	4.817	4.298	30.5	30.103	26.861	0	5.965	5.93	0	37.284	37.06
PI3Kd_Y685A_idelalisib	YDFVHVIQQGKTNNSEKFERFRG	936	958	3	21	12.98	3.039	2.677	3.018	14.471	12.746	14.37	4.573	4.284	4.106	21.777	20.401	19.554	5.138	6.065	6.037	24.467	28.883	28.746
PI3Kd_Y685A_idelalisib	FVHVIQQGKTNNSEKFERF	938	956	4	17	10.35	2.378	1.959	2.324	13.986	11.526	13.673	3.679	3.508	3.125	21.64	20.637	18.384	4.477	0	4.384	26.338	0	25.789
PI3Kd_Y685A_idelalisib	FVHVIQQGKTNNSEKFERFRG	938	958	4	19	8.53	2.029	1.676	2.07	10.68	8.82	10.895	3.414	3.04	3.015	17.969	15.999	15.87	3.61	4.387	4.246	18.999	23.092	22.347
PI3Kd_Y685A_idelalisib	VHVIQQGKTNNSEKFERFRG	939	958	3	18	6.86	2.215	1.949	2.209	12.303	10.83	12.273	3.749	3.222	3.334	20.826	17.899	18.522	3.966	4.642	4.772	22.033	25.79	26.511
PI3Kd_Y685A_idelalisib	HVIQQGKTNNSEKFERFRG	940	958	4	17	6.09	2.569	2.153	2.657	15.109	12.665	15.631	3.799	3.535	3.283	22.345	20.792	19.309	4.119	5.46	5.011	24.23	32.116	29.478
PI3Kd_Y685A_idelalisib	RGYCERA	957	963	2	5	2.45	0.135	0.027	0	2.709	0.542	0	0.101	0.078	-0.054	2.018	1.561	-1.084	0.079	0	0.108	1.587	0	2.163
PI3Kd_Y685A_idelalisib	RAYTIL	962	967	1	4	13.16	0.003	0.004	-0.041	0.063	0.097	-1.028	0.023	0.058	0.01	0.579	1.445	0.248	0.033	-0.048	-0.018	0.82	-1.206	-0.452
PI3Kd_Y685A_idelalisib	YTILRRHGLLF	964	974	2	9	15.8	0.412	0.333	0.35	4.579	3.696	3.89	0.753	0.695	0.659	8.364	7.718	7.319	0	1.172	1.167	0	13.019	12.963
PI3Kd_Y685A_idelalisib	ILRRHGLL	966	973	2	6	7.22	0.37	0.185	0.334	6.165	3.083	5.564	0.951	0.697	0.647	15.846	11.619	10.775	0.984	0.942	1.314	16.396	15.707	21.903
PI3Kd_Y685A_idelalisib	ILRRHGLLF	966	974	2	7	13.57	0.287	0.229	0.335	4.101	3.266	4.791	0	0	0.622	0	0	8.891	0	0	1.086	0	0	15.518
PI3Kd_Y685A_idelalisib	FALMRAAGL	978	986	2	7	17.04	0.629	0.422	0.65	8.979	6.028	9.29	2.25	2.227	2.082	32.14	31.819	29.749	3.894	3.897	4.368	55.633	55.674	62.405
PI3Kd_Y685A_idelalisib	FALMRAAGLPEL	978	989	2	9	19.8	0.743	0.541	0.649	8.261	6.008	7.213	3.6	2.721	2.77	40.002	30.238	30.777	0	5.345	5.307	0	59.385	58.967
PI3Kd_Y685A_idelalisib	RAAGLPEL	982	989	2	5	13.32	0.524	0.359	0.412	10.48	7.186	8.238	1.994	1.795	1.86	39.885	35.893	37.192	0	3.775	3.802	0	75.493	76.037
PI3Kd_Y685A_idelalisib	RAAGLPELSC	982	991	2	7	13.04	1.6	1.372	1.471	22.852	19.607	21.017	3.692	3.398	3.464	52.739	48.545	49.483	5.296	5.417	5.566	75.663	77.391	79.517
PI3Kd_Y685A_idelalisib	PELSCSKDIQY	987	997	2	9	12.18	2.352	2.367	2.474	26.131	26.302	27.49	4.865	4.517	4.226	54.058	50.193	46.959	5.091	5.516	5.649	56.572	61.291	62.769
PI3Kd_Y685A_idelalisib	PELSCSKDIQYLKD	987	1000	3	12	12.53	1.977	1.898	1.735	16.471	15.813	14.46	4.301	4.01	3.894	35.838	33.413	32.454	0	5.513	5.752	0	45.944	47.936
PI3Kd_Y685A_idelalisib	SCSKDIQY	990	997	2	6	7.04	1.743	1.554	1.683	29.046	25.892	28.058	3.833	3.607	3.662	63.886	60.12	61.039	3.801	4.403	4.307	63.349	73.386	71.779
PI3Kd_Y685A_idelalisib	SCSKDIQYLKD	990	1000	3	9	8.41	1.43	1.459	1.313	15.888	16.217	14.594	3.761	3.541	3.777	41.79	39.348	41.967	4.184	4.66	5.102	46.485	51.774	56.689
PI3Kd_Y685A_idelalisib	SCSKDIQYLKDSL	990	1002	3	11	15.43	1.353	1.239	1.024	12.301	11.262	9.308	3.113	3.447	2.782	28.301	31.335	25.291	4.771	3.943	4.733	43.371	35.843	43.03
PI3Kd_Y685A_idelalisib	SKDIQYLKDSL	992	1002	2	9	12.78	0.982	0.89	1.02	10.912	9.887	11.337	2.539	2.757	2.624	28.217	30.633	29.157	3.294	3.59	3.23	36.6	39.894	35.89
PI3Kd_Y685A_idelalisib	IQYLKDSL	995	1002	2	6	13.15	0.564	0.542	0.464	9.4	9.035	7.734	1.022	0.853	0.858	17.033	14.213	14.297	1.452	1.563	1.576	24.207	26.044	26.263
PI3Kd_Y685A_idelalisib	LKDSLALGKTEEEALKHFRVKF	998	1019	5	20	16.51	3.192	0	2.691	15.962	0	13.457	3.221	3.651	3.603	16.104	18.254	18.015	0	5.372	6.185	0	26.86	30.924
PI3Kd_Y685A_idelalisib	SLALGKTEE	1001	1009	2	7	7.18	2.81	2.681	2.699	40.139	38.303	38.564	3.611	3.457	3.383	51.581	49.392	48.332	0	4.375	4.439	0	62.497	63.42
PI3Kd_Y685A_idelalisib	SLALGKTEEE	1001	1010	2	8	7.45	2.708	2.549	2.653	33.848	31.861	33.166	0	3.541	3.566	0	44.268	44.581	0	4.801	4.907	0	60.01	61.333
PI3Kd_Y685A_idelalisib	SLALGKTEEEALKHFRVKF	1001	1019	4	17	16.61	2.352	2.195	2.311	13.834	12.91	13.596	3.299	3.15	3.102	19.407	18.527	18.247	0	4.942	4.759	0	29.072	27.995
PI3Kd_Y685A_idelalisib	SLALGKTEEEALKHFRVKFNE	1001	1021	4	19	16.01	2.366	2.202	2.441	12.45	11.592	12.849	3.412	3.152	3.254	17.956	16.59	17.124	5.341	5.633	5.633	28.112	29.647	29.648
PI3Kd_Y685A_idelalisib	SLALGKTEEEALKHFRVKFNEA	1001	1022	3	20	16.1	2.564	2.457	2.482	12.819	12.286	12.41	3.453	3.475	3.41	17.267	17.376	17.05	0	5.361	5.25	0	26.804	26.251
PI3Kd_Y685A_idelalisib	SLALGKTEEEALKHFRVKFNEAL	1001	1023	4	21	17.9	2.364	2.188	2.357	11.256	10.42	11.222	3.524	3.181	3.285	16.783	15.148	15.641	0	6.555	5.972	0	31.212	28.436
PI3Kd_Y685A_idelalisib	ALGKTEEEALKHFRVKF	1003	1019	4	15	14.69	1.743	1.597	1.745	11.62	10.646	11.633	2.536	2.465	2.32	16.908	16.437	15.467	3.51	4.164	3.87	23.399	27.761	25.803
PI3Kd_Y685A_idelalisib	ALGKTEEEALKHFRVKFNE	1003	1021	4	17	14.42	1.785	2.319	1.857	10.5	13.643	10.921	2.278	2.626	2.296	13.401	15.446	13.505	2.924	4.435	4.587	17.197	26.088	26.982
PI3Kd_Y685A_idelalisib	ALGKTEEEALKHFRVKFNEA	1003	1022	4	18	14.16	2.062	1.919	1.865	11.453	10.661	10.36	2.803	2.709	2.502	15.572	15.051	13.899	4.171	0	4.416	23.17	0	24.535
PI3Kd_Y685A_idelalisib	ALGKTEEEALKHFRVKFNEAL	1003	1023	3	19	16.31	1.829	1.574	1.809	9.625	8.283	9.521	2.774	2.656	2.525	14.6	13.981	13.292	5.289	5.373	5.418	27.836	28.28	28.517
PI3Kd_Y685A_idelalisib	EALKHFRVKF	1010	1019	3	8	10.54	0.008	0.003	-0.019	0.096	0.031	-0.236	0.057	0.021	0.063	0.714	0.262	0.792	0.217	0.308	0.283	2.716	3.845	3.54
PI3Kd_Y685A_idelalisib	EALKHFRVKFNE	1010	1021	3	10	9.46	0.035	0.033	0.017	0.355	0.329	0.171	0.144	0.058	0.119	1.439	0.585	1.192	0	0.848	0.744	0	8.477	7.439
PI3Kd_Y685A_idelalisib	EALKHFRVKFNEA	1010	1022	2	11	9.53	1.092	1.061	0	9.929	9.648	0	2.439	2.334	2.227	22.172	21.215	20.247	0	0	3.384	0	0	30.767
PI3Kd_Y685A_idelalisib	EALKHFRVKFNEAL	1010	1023	3	12	12.38	0.087	0.061	0.057	0.728	0.505	0.472	0	0.266	0.25	0	2.219	2.08	0	1.579	1.483	0	13.16	12.359
PI3Kd_Y685A_idelalisib	ALKHFRVKFNE	1011	1021	3	9	8.82	0.098	-0.061	0.054	1.088	-0.681	0.595	0.104	0.138	0.087	1.153	1.533	0.961	0.412	0.502	0.334	4.579	5.576	3.708
PI3Kd_Y685A_idelalisib	ALKHFRVKFNEAL	1011	1023	3	11	11.52	0.082	0.056	0.024	0.741	0.51	0.223	0.24	0.155	0.206	2.186	1.408	1.87	1.014	1.31	1.212	9.217	11.908	11.017
PI3Kd_Y685A_idelalisib	ALRESWKTKVNWLAHNVSKDNRQ	1022	1044	5	21	12	10.963	10.703	10.896	52.206	50.968	51.888	12.157	11.44	11.78	57.89	54.478	56.094	10.855	12.553	12.628	51.692	59.775	60.135
PI3Kd_Y685A_idelalisib	LRESWKTKVNW	1023	1033	3	9	12.25	4.184	3.968	4.007	46.492	44.084	44.521	4.748	4.506	4.285	52.759	50.071	47.616	4.084	4.694	4.726	45.376	52.15	52.507
PI3Kd_Y685A_idelalisib	LRESWKTKVNWLAHNVSKDNRQ	1023	1044	5	20	11.48	10.132	9.957	9.891	50.661	49.783	49.456	11.148	10.744	10.723	55.741	53.72	53.616	9.99	11.038	11.46	49.948	55.19	57.3
PI3Kd_Y685A_idelalisib	RESWKTKVNW	1024	1033	3	8	11.85	4.126	3.939	4.151	51.573	49.234	51.891	4.596	4.465	4.305	57.452	55.819	53.816	4.196	4.57	4.687	52.451	57.124	58.589
PI3Kd_Y685A_idelalisib	RESWKTKVNWLAHNVSKDNRQ	1024	1044	4	19	10.98	10.383	9.951	10.233	54.646	52.374	53.857	11.381	11.294	11.16	59.898	59.442	58.737	11.424	11.591	11.878	60.125	61.005	62.515
PI3Kd_Y685A_idelalisib	RESWKTKVNWLAHNVSKDNRQ	1024	1044	5	19	10.98	10.342	9.915	10.549	54.432	52.186	55.52	11.463	11.17	11.463	60.329	58.791	60.33	11.647	11.398	11.649	61.301	59.992	61.309
PI3Kd_Y685A_idelalisib	SWKTKVNWLAHNVSKDNRQ	1026	1044	4	17	11.8	10.103	9.922	10.273	59.428	58.363	60.432	11.093	10.985	10.848	65.25	64.619	63.809	10.626	11.098	11.701	62.504	65.28	68.828
PI3Kd_Y685A_idelalisib	SWKTKVNWLAHNVSKDNRQ	1026	1044	5	17	11.8	10.037	9.675	10.332	59.038	56.911	60.777	11.934	11.789	10.762	70.199	69.345	63.305	10.523	11.325	11.83	61.897	66.617	69.589
PI3Kd_Y685A_idelalisib	KTKVNWLAHNVSKDNRQ	1028	1044	4	15	6	6.63	6.332	6.766	44.198	42.215	45.107	7.476	7.187	7.126	49.839	47.915	47.506	6.72	7.46	7.643	44.803	49.732	50.956

## Sheet: Table S5 HDX average values
	HDX-MS analysis
	Experiment was done using protein stocks
	Reactions were run in 50 ul volume
	Deuterium uptake for each of the conditionsis listed below
	Manual validation of each of the peptides was done
	RESULT TABLE :
	Deuterium incorporation for each of the selected peptides used for HDX-MS analysis are presented.
	Results are shown both as percentage deuteration compared to a theoretical maximal deuteration level and as number of deuterons incorporated into the peptide (#D)
							PI3Kd_WT_apo			PI3Kd_WT_apo				PI3Kd_Y685A_apo							PI3Kd_WT_roginolisib							PI3Kd_Y685A_roginolisib							PI3Kd_WT_idelalisib							PI3Kd_Y685A_idelalisib
						Deuteration Levels			Deuteration Levels				Deuteration Levels			Deuteration Levels				Deuteration Levels			Deuteration Levels				Deuteration Levels			Deuteration Levels				Deuteration Levels			Deuteration Levels				Deuteration Levels			Deuteration Levels
						Percentage (%)			Number of deuterons (#D)				Percentage (%)			Number of deuterons (#D)				Percentage (%)			Number of deuterons (#D)				Percentage (%)			Number of deuterons (#D)				Percentage (%)			Number of deuterons (#D)				Percentage (%)			Number of deuterons (#D)
						3s	30s	300s	3s	30s	300s		3s	30s	300s	3s	30s	300s		3s	30s	300s	3s	30s	300s		3s	30s	300s	3s	30s	300s		3s	30s	300s	3s	30s	300s		3s	30s	300s	3s	30s	300s
Start	End	Charge	Search RT	Sequence		%D	%D	%D	#D	#D	#D		%D	%D	%D	#D	#D	#D		%D	%D	%D	#D	#D	#D		%D	%D	%D	#D	#D	#D		%D	%D	%D	#D	#D	#D		%D	%D	%D	#D	#D	#D
11	19	2	7.92	FWTKEENQS		63.0835	65.416	64.9027	4.416	4.5795	4.54333		64.3073	68.1567	67.6463	4.50133	4.771	4.73533		66.104	66.5647	64.7317	4.6275	4.65967	4.531		63.8243	64.559	66.749	4.593	4.529	4.67233		64.4777	65.6295	63.2737	4.51367	4.594	4.429		64.22	66.2887	64.057	4.49567	4.64033	4.484
12	19	2	1.85	WTKEENQS		66.523	72.293	72.1253	3.991	4.3375	4.32767		69.2963	75.2827	71.616	4.15767	4.517	4.297		71.6765	73.19	72.0443	4.3005	4.39133	4.32267		68.3913	71.2317	71.8357	4.169	3.85	4.31		68.3207	70.6235	69.5007	4.09933	4.2375	4.17033		69.175	68.8147	70.9747	4.1505	4.12867	4.25833
12	20	1	5.85	WTKEENQSV		59.3715	62.2015	68.3233	4.156	4.354	4.78267		58.396	61.9147	69.7313	4.08767	4.334	4.88133		61.4775	62.8347	68.22	4.3035	4.39833	4.77533		57.893	61.344	69.377	0	4.159	4.85633		59.2867	62.029	67.3277	4.15033	4.342	4.71333		58.783	61.631	68.8813	4.115	4.31433	4.82167
12	21	2	8.05	WTKEENQSVV		47.2045	53.6805	64.611	3.776	4.2945	5.169		45.836	56.838	66.021	3.667	4.547	5.28167		47.1415	52.859	65.2677	3.771	4.22867	5.22133		45.4853	52.705	64.5223	3.673	3.828	5.16167		47.4123	56.177	66.034	3.793	4.4945	5.283		48.0403	57.0703	64.927	3.843	4.566	5.194
12	23	2	8.33	WTKEENQSVVVD		39.198	45.939	53.684	3.92	4.594	5.36833		38.498	46.3753	54.447	3.84967	4.63733	5.445		40.562	46.2247	53.627	4.0565	4.62233	5.36233		38.041	44.7483	54.6347	3.958	3.858	5.46367		38.9423	45.543	53.7127	3.89433	4.5545	5.37133		38.694	45.427	54.341	3.86967	4.54267	5.434
21	31	1	21.11	VVDFLLPTGVY		-0.718	6.7235	10.3385	-0.057	0.538	0.827		0.022	4.68967	12.518	0.002	0.375	1.001		0.3775	2.36133	12.2407	0.03	0.188667	0.979		0.558	4.188	12.3745	0.045	0	0.99		0.3095	3.673	13.4245	0.025	0.294	1.074		1.0035	5.04767	14.0155	0.0805	0.403667	1.1215
24	30	1	18.18	FLLPTGV		2.285	11.8185	27.7493	0.091	0.473	1.10967		2.22533	13.269	27.1857	0.089	0.530667	1.08733		3.7105	11.429	27.1223	0.1485	0.457	1.085		5.334	11.413	26.8613	0.108	0.055	1.07467		3.131	10.082	26.803	0.125	0.4035	1.072		1.81967	10.876	27.4345	0.0726667	0.435	1.097
24	31	1	19.59	FLLPTGVY		1.334	8.379	21.3487	0.067	0.419	1.06733		1.4035	9.13967	21.351	0.0705	0.456667	1.06733		3.0205	9.06667	21.0287	0.1515	0.453333	1.05133		2.136	9.277	22.2967	0.086	0.056	1.115		4.13167	8.679	21.6947	0.206667	0.434	1.08467		1.24467	8.70833	21.5825	0.062	0.435333	1.079
31	42	2	15.63	YLNFPVSRNANL		20.5005	34.1365	35.6253	1.845	3.072	3.20633		21.8227	33.6227	35.514	1.96433	3.026	3.19633		21.5005	33.436	35.6783	1.935	3.00933	3.21133		21.7333	32.799	36.4817	2.088	1.884	3.28333		21.7727	34.539	35.7397	1.95967	3.1085	3.21667		21.3713	33.6357	36.2667	1.92333	3.02733	3.264
32	42	2	13.59	LNFPVSRNANL		16.28	31.0055	33.1603	1.3025	2.4805	2.65267		17.5437	30.4473	31.8307	1.40333	2.43567	2.54633		17.6175	30.572	33.2983	1.4095	2.44567	2.66367		17.225	29.5083	33.3533	1.495	1.266	2.66833		17.232	30.881	32.1017	1.37867	2.4705	2.568		16.9933	30.8113	34.082	1.35933	2.465	2.72667
32	44	2	12.39	LNFPVSRNANLST		11.5975	24.7795	36.5057	1.16	2.478	3.65033		12.8077	25.683	37.443	1.281	2.56833	3.74433		13.259	25.6707	38.264	1.326	2.567	3.82633		12.7273	24.875	36.8617	1.351	1.188	3.686		12.6763	25.738	36.3883	1.26767	2.574	3.63867		12.5913	25.77	37.8643	1.259	2.57733	3.78633
35	42	2	4.51	PVSRNANL		24.8595	48.1335	52.167	1.4915	2.888	3.13		26.5873	49.149	53.028	1.59533	2.94867	3.18167		26.931	48.722	52.7023	1.616	2.923	3.162		26.8843	48.4183	52.816	1.716	1.534	3.169		27.021	48.3135	51.4533	1.621	2.8985	3.087		26.4677	48.6417	49.6525	1.588	2.91867	2.979
43	49	2	13.27	STIKQLL		0.579	0.353	0.7275	0.029	0.018	0.0365		0.2145	-0.4535	0.420667	0.011	-0.023	0.021		0.218	-0.0343333	0.734667	0.022	-0.002	0.0366667		0.3295	0.711	0.249	0.044	-0.011	0.0123333		-0.683667	-0.366	0.429	-0.034	-0.0185	0.021		0.415	-0.033	0.428	0.0206667	-0.00133333	0.0215
43	59	3	18.36	STIKQLLWHRAQYEPLF		4.0045	10.4825	18.943	0.5605	1.4675	2.65233		4.312	10.044	19.2497	0.604	1.406	2.695		4.072	9.79967	18.8197	0.57	1.372	2.63467		4.28767	9.915	19.6227	0.654	0.545	2.747		4.20833	9.999	18.9093	0.589333	1.4	2.647		4.21667	10.1833	20.05	0.590333	1.42533	2.807
43	67	3	19.44	STIKQLLWHRAQYEPLFHMLSGPEA		12.493	24.6685	32.7637	2.6235	5.1805	6.88067		13.271	24.0623	33.0523	2.787	5.053	6.941		12.691	23.705	32.615	2.665	4.978	6.84933		12.978	23.5163	32.7227	2.778	2.593	6.872		13.193	24.3025	33.053	2.77067	5.1035	6.941		12.9827	24.478	29.6533	2.72667	5.14	6.227
48	59	2	18.7	LLWHRAQYEPLF		6.1985	17.133	26.4817	0.5575	1.542	2.38333		6.166	15.7757	25.4397	0.555	1.41967	2.28967		6.304	15.9847	25.7903	0.567	1.43867	2.321		7.4825	14.9507	27.3467	0.687	0.66	2.461		5.8175	14.3795	23.831	0.524	1.2945	2.14467		5.7635	14.8523	27.2555	0.519	1.33667	2.453
60	67	2	6.4	HMLSGPEA		27.9185	46.203	57.3033	1.396	2.3105	2.865		28.869	47.5207	59.418	1.44367	2.376	2.971		29.667	46.587	59.067	1.483	2.32933	2.953		30.827	46.4947	58.8643	1.531	1.39	2.94333		29.3127	46.1495	58.211	1.46567	2.3075	2.9105		30.9237	46.932	54.5165	1.546	2.34667	2.726
71	82	2	10.21	TCINQTAEQQEL		10.6955	26.962	34.1607	1.0695	2.6965	3.41567		11.3803	27.3213	34.5497	1.138	2.732	3.455		11.296	26.331	32.9283	1.13	2.633	3.29267		11.924	25.8697	34.3333	1.277	1.224	3.43367		11.3083	26.221	31.4673	1.131	2.622	3.147		17.2407	27.068	35.605	1.724	2.70667	3.5605
71	96	3	20.05	TCINQTAEQQELEDEQRRLCDVQPFL		16.252	34.2905	44.7093	3.738	7.887	10.283		17.3383	34.8043	45.623	3.98767	8.005	10.4933		16.622	33.782	44.4057	3.8235	7.77	10.2133		17.7573	34.366	45.647	4.119	3.857	10.499		16.9857	34.197	44.7323	3.907	7.8655	10.2883		17.1637	34.4763	45.6957	3.94767	7.92967	10.51
83	96	2	17.2	EDEQRRLCDVQPFL		5.231	19.601	31.181	0.575	2.156	3.43033		8.15267	19.3857	32.9907	0.896667	2.13233	3.629		6.031	18.9847	32.0283	0.6635	2.08833	3.52333		7.422	19.732	32.8287	0.674	0.72	3.611		7.18267	19.27	32.2463	0.79	2.12	3.547		6.92233	19.7923	32.8697	0.761667	2.177	3.61567
85	96	2	16.52	EQRRLCDVQPFL		4.361	16.03	27.7643	0.3925	1.4425	2.499		4.61433	16.6387	28.7393	0.415333	1.49733	2.58667		5.532	17.4687	28.7723	0.4975	1.572	2.58933		5.70733	17.346	29.453	0.573	0.504	2.651		5.55467	16.8435	27.9405	0.5	1.516	2.5145		5.40333	16.919	29.6645	0.486333	1.52267	2.6695
86	102	3	9.83	QRRLCDVQPFLPVLRLV		2.0955	8.2495	14.9953	0.272	1.0725	1.94933		1.926	7.38467	14.8243	0.250667	0.960333	1.927		0.896	8.85767	14.0753	0.1165	1.15133	1.82967		2.11067	8.356	16.3227	0.36	0.264	2.122		2.186	8.747	15.9973	0.284	1.137	2.07933		2.12667	8.47367	17.0003	0.276333	1.10167	2.21
87	101	3	20.63	RRLCDVQPFLPVLRL		2.675	10.339	17.3353	0.294	1.1375	1.907		1.99033	12.597	16.984	0.219	1.38567	1.8685		1.939	10.125	17.8955	0.213	1.11367	1.9685		3.492	12.0667	22.7005	0.025	0.429	2.497		2.00733	10.615	16.1107	0.220667	1.1675	1.772		2.16733	11.5843	20.491	0.238333	1.274	2.254
92	101	2	20.96	VQPFLPVLRL		1.4225	2.8085	11.5797	0.0855	0.1685	0.694667		1.20067	3.357	12.4717	0.072	0.201333	0.748667		1.8015	2.09433	12.7783	0.108	0.125667	0.766667		1.321	2.683	13.431	0.057	0.032	0.806		-0.631	-0.9135	8.985	-0.038	-0.055	0.539		-1.06133	1.345	13.013	-0.0633333	0.0806667	0.780667
100	120	3	15.26	RLVAREGDRVKKLINSQISLL		38.3205	45.277	45.8337	7.2805	8.6025	8.70833		37.6173	45.9957	45.1553	7.147	8.73933	8.57933		37.7085	45.1477	47.4187	7.165	8.57833	9.00933		40.5067	43.819	49.5213	7.544	8.051	9.409		38.646	45.9895	48.2677	7.34267	8.738	9.171		39.06	44.7047	44.3233	7.42133	8.494	8.42133
102	115	2	6.04	VAREGDRVKKLINS		57.016	61.1685	60.924	6.842	7.34	7.31067		57.011	60.048	60.5633	6.84133	7.2055	7.26767		59.505	61.7265	59.1187	7.1405	7.407	7.094		57.3163	58.6207	63.419	7.109	6.71	7.6105		58.088	61.995	61.674	6.97033	7.4395	7.401		57.2177	59.5423	59.8865	6.86633	7.145	7.1865
102	116	2	6.59	VAREGDRVKKLINSQ		53.6745	62.492	60.2933	6.978	8.124	7.83833		55.084	61.2477	62.6253	7.161	7.962	8.14167		56.0535	60.4803	63.2407	7.287	7.86267	8.221		54.178	58.6263	63.484	7.492	6.594	8.253		54.1397	60.547	62.265	7.038	7.871	8.09433		53.858	60.3233	61.182	7.00167	7.842	7.95367
102	119	3	12.72	VAREGDRVKKLINSQISL		38.211	46.5815	47.4057	6.1135	7.453	7.58467		39.617	44.7927	48.9817	6.339	7.16667	7.837		39.477	45.3463	48.173	6.316	7.25533	7.70767		39.8187	46.134	50.342	6.145	6.392	8.05467		39.9807	46.026	49.062	6.39667	7.364	7.85		40.2997	45.4877	49.272	6.44833	7.27833	7.88367
102	120	2	15.69	VAREGDRVKKLINSQISLL		38.1045	42.91	44.102	6.478	7.2945	7.49733		38.089	40.422	43.8897	6.47533	6.872	7.461		37.1945	41.5057	46.5027	6.323	7.056	7.90533		38.526	41.3383	47.2897	6.804	6.167	8.03967		38.281	43.3465	46.203	6.50767	7.3685	7.85433		38.3567	40.7287	48.0013	6.521	6.924	8.16033
120	127	2	5.27	LIGKGLHE		9.417	18.1275	39.6117	0.565	1.088	2.377		10.2117	19.234	41.348	0.612667	1.154	2.481		10.7345	18.622	38.369	0.6445	1.11733	2.302		10.365	18.5593	39.369	0.703	0.634	2.3625		10.028	18.003	39.7305	0.601667	1.0805	2.384		9.74033	19.3917	41.228	0.584333	1.16367	2.4735
120	131	2	15.17	LIGKGLHEFDSL		7.668	24.8475	30.029	0.767	2.485	3.003		8.26367	24.4703	30.531	0.826333	2.447	3.053		7.676	23.069	30.7037	0.7675	2.307	3.07033		8.25	23.0663	31.2553	0.928	0.768	3.12567		8.257	24.6655	30.7123	0.825667	2.4665	3.071		8.339	24.3833	32.9215	0.834	2.43833	3.292
120	138	3	17	LIGKGLHEFDSLCDPEVND		11.982	23.491	31.7687	1.917	3.759	5.083		10.6063	24.2063	31.5037	1.69733	3.873	5.04067		11.5045	24.3257	30.3823	1.841	3.89233	4.861		11.9373	22.8083	32.1755	2.121	1.813	5.148		11.8447	22.4575	32.1217	1.89533	3.593	5.13933		11.5693	22.9997	33.067	1.85133	3.68	5.2905
120	139	3	19.29	LIGKGLHEFDSLCDPEVNDF		10.7185	22.531	27.1847	1.8225	3.83	4.62133		11.1577	20.5683	27.685	1.89667	3.49667	4.70633		11.341	20.5027	27.718	1.928	3.48567	4.71167		11.4677	19.545	27.9967	2.047	1.861	4.75933		11.1363	20.5435	27.8397	1.89333	3.4925	4.73267		11.1313	20.2937	28.9793	1.892	3.45	4.92633
121	127	1	2.42	IGKGLHE		11.032	21.593	48.004	0.5515	1.08	2.40033		12.0243	23.2767	48.6403	0.601333	1.16367	2.432		13.573	22.8143	48.2487	0.6785	1.14067	2.41233		10.5903	22.3403	50.9617	0.73	0.519	2.548		12.0503	20.7165	44.6813	0.602333	1.036	2.234		10.732	22.8127	47.436	0.536667	1.14067	2.372
121	128	2	9.35	IGKGLHEF		2.766	11.498	21.109	0.166	0.69	1.26667		3.28267	12.285	22.556	0.197	0.737333	1.35333		3.582	12.027	21.8307	0.215	0.721333	1.30967		2.65767	12.7753	22.2137	0.204	0.142	1.333		2.94533	12.12	21.333	0.176667	0.727	1.28		2.853	12.7803	24.7945	0.171333	0.766667	1.4875
121	131	2	13.9	IGKGLHEFDSL		8.31	24.9815	31.2547	0.748	2.2485	2.813		12.8605	25.9043	29.9253	1.1575	2.33133	2.69333		8.0185	24.0227	30.1295	0.7215	2.162	2.7115		8.417	24.4403	30.91	0.816	0.708	2.7815		8.291	26.015	30.0077	0.746333	2.341	2.70067		8.25	26.2023	28.4553	0.742667	2.35833	2.561
121	138	3	16.05	IGKGLHEFDSLCDPEVND		12.741	23.4175	29.7247	1.9115	3.5125	4.45867		12.9563	23.932	31.368	1.94333	3.59	4.70533		13.132	22.8823	31.0027	1.97	3.43233	4.65067		11.747	22.2177	31.6153	1.939	1.864	4.742		12.723	24.4675	30.371	1.90833	3.67	4.55533		12.802	24.0887	31.3323	1.92033	3.613	4.69967
122	127	1	2.43	GKGLHE		8.198	21.4745	47.6167	0.328	0.859	1.90467		10.5907	23.067	50.293	0.423333	0.922667	2.012		12.5325	23.239	47.5247	0.5015	0.929667	1.901		9.548	20.4227	50.2283	0.565	0.358	2.009		10.4153	19.6485	47.5557	0.416667	0.786	1.90233		9.414	23.4983	48.9543	0.376667	0.94	1.95833
128	139	1	18.84	FDSLCDPEVNDF		9.1715	16.1175	25.134	0.825	1.451	2.262		9.06	18.2807	26.1607	0.815333	1.64533	2.35433		9.1985	16.2117	24.3483	0.828	1.459	2.19167		8.574	17.0727	25.6923	0.848	0.771	2.31233		9.02733	16.5465	24.554	0.812667	1.489	2.21		9.112	17.3697	27.909	0.82	1.56333	2.5115
132	138	1	3.32	CDPEVND		2.378	6.6235	29.8963	0.0955	0.265	1.19567		2.927	7.60767	32.8673	0.117333	0.304333	1.31467		2.825	6.26033	28.9433	0.113	0.250333	1.15767		2.44267	6.42967	31.8793	0.15	0.084	1.27533		2.79667	6.569	30.197	0.111667	0.2625	1.20767		2.807	7.531	34.414	0.112333	0.301333	1.37667
132	139	1	12.52	CDPEVNDF		2.4585	4.9815	20.207	0.123	0.249	1.01033		2.643	5.63267	21.7943	0.132333	0.281667	1.09		2.501	4.891	18.9607	0.125	0.244667	0.948		2.494	5.383	21.2747	0.152	0.106	1.06367		2.8245	4.936	21.034	0.141	0.2465	1.052		2.763	5.857	23.012	0.138	0.292667	1.151
134	139	1	11.67	PEVNDF		2.1965	2.2825	10.75	0.0875	0.0915	0.43		0.919667	2.939	11.3223	0.0366667	0.117667	0.453		1.689	1.56	9.24933	0.0675	0.0623333	0.369667		1.58833	1.38367	11.8263	0.101	0.095	0.473		1.32067	1.937	9.788	0.053	0.0775	0.391667		2.47967	2.284	13.557	0.099	0.0913333	0.542667
139	146	2	12.21	FRAKMCQF		1.1855	9.7845	25.8913	0.071	0.587	1.55333		1.376	10.554	27.0953	0.0825	0.633333	1.62567		1.221	9.208	25.4785	0.073	0.5525	1.5285		1.109	9.5135	26.9345	0.104	0.041	1.616		1.166	9.766	26.22	0.0696667	0.586	1.57333		1.257	10.3407	27.7877	0.0756667	0.620333	1.66733
146	162	3	18.19	FCEEAAARRQQLGWEAW		9.5365	23.334	44.644	1.4305	3.5	6.69667		10.5075	24.082	46.4033	1.5765	3.61233	6.96067		10.2915	23.108	43.937	1.5435	3.46633	6.59067		11.0633	23.075	46.0777	1.732	1.557	6.91167		9.30267	22.6175	43.7533	1.39533	3.3925	6.56267		9.465	22.9867	46.508	1.41967	3.448	6.9765
147	162	3	17.4	CEEAAARRQQLGWEAW		9.7895	23.968	44.94	1.3705	3.3555	6.29167		10.8785	24.2933	46.409	1.5235	3.401	6.49733		10.847	23.613	44.5365	1.5185	3.30567	6.235		11.11	23.374	46.1573	1.664	1.483	6.462		9.561	23.1795	44.5035	1.33867	3.245	6.2305		9.65467	23.472	45.3657	1.352	3.286	6.351
150	161	2	10.2	AAARRQQLGWEA		14.0565	32.7165	59.198	1.4055	3.2715	5.91967		15.3975	33.91	59.895	1.5395	3.39067	5.98933		14.9585	32.5643	57.3613	1.4955	3.25633	5.736		15.7245	33.2383	59.0567	1.653	1.492	5.90567		13.5087	31.7245	59.1853	1.35067	3.1725	5.91867		13.9887	32.7047	60.726	1.399	3.27033	6.07267
150	162	2	17.58	AAARRQQLGWEAW		11.7635	27.042	46.2163	1.294	2.9745	5.08367		12.4547	27.3963	47.299	1.37	3.01333	5.203		12.6435	26.963	45.827	1.391	2.966	5.041		9.85233	26.866	47.6157	1.508	1.394	5.23767		11.381	25.9415	45.0243	1.25167	2.8535	4.953		11.374	26.3967	46.9663	1.251	2.90333	5.16633
151	162	2	17.67	AARRQQLGWEAW		11.9515	28.1215	45.4467	1.195	2.812	4.545		13.4963	28.2503	46.045	1.34967	2.82467	4.60467		12.688	27.936	44.703	1.269	2.79333	4.47033		14.929	27.0237	47.3007	1.483	1.389	4.73		11.8903	27.3435	43.2937	1.189	2.7345	4.32933		12.6647	26.9943	47.994	1.26633	2.69933	4.79933
152	162	2	17.68	ARRQQLGWEAW		12.989	30.1865	46.7997	1.169	2.717	4.212		13.25	29.6625	50.1355	1.193	2.6695	4.512		13.8965	29.74	45.475	1.251	2.6765	4.093		14.848	29.175	48.6063	1.339	1.334	4.37467		13.237	28.789	46.473	1.19133	2.591	4.1825		13.5907	27.822	51.3115	1.223	2.504	4.618
162	191	3	20.95	WLQYSFPLQLEPSAQTWGPGTLRLPNRALL		39.88	47.5845	57.5803	9.5715	11.4205	13.8193		40.4557	47.7937	57.3423	9.70933	11.4703	13.762		40.8875	46.988	58.5377	9.813	11.277	14.049		40.448	46.3523	57.5627	9.717	9.46	13.8153		41.0597	48.363	57.866	9.85433	11.607	13.888		39.9197	47.833	57.138	9.58067	11.4797	13.713
163	191	3	20.63	LQYSFPLQLEPSAQTWGPGTLRLPNRALL		44.417	52.0725	62.4803	10.2155	11.977	14.3707		44.8687	52.557	62.52	10.32	12.088	14.3797		45.417	51.5813	62.41	10.446	11.864	14.3543		44.6857	51.8063	62.9583	10.364	10.176	14.4807		44.901	52.9895	61.9233	10.3273	12.188	14.2427		44.5673	52.0013	62.63	10.2503	11.9603	14.405
164	191	3	20.56	QYSFPLQLEPSAQTWGPGTLRLPNRALL		47.0055	54.623	65.353	10.341	12.017	14.3777		46.9043	54.853	65.346	10.319	12.0677	14.3763		47.1315	53.9013	64.7245	10.369	11.8583	14.2395		46.7457	54.339	66.494	10.332	10.178	14.6287		47.4397	55.395	65.2935	10.437	12.187	14.365		46.6827	54.6693	65.7687	10.27	12.027	14.4693
168	191	3	19.42	PLQLEPSAQTWGPGTLRLPNRALL		55.92	63.966	71.559	10.6245	12.154	13.5963		55.5453	63.2287	71.6863	10.5537	12.0137	13.6207		56.757	63.2657	71.4727	10.784	12.0207	13.5797		54.9277	62.187	72.0833	10.709	10.524	13.6957		56.1133	64.016	71.8545	10.6613	12.163	13.6525		55.2727	62.8547	71.721	10.5017	11.9423	13.627
176	191	3	17.82	QTWGPGTLRLPNRALL		62.0965	68.534	76.7833	7.4515	8.224	9.214		62.0293	68.8457	75.1533	7.44367	8.26133	9.01833		63.3115	68.3923	76.656	7.5975	8.207	9.19867		61.324	68.2757	77.3573	7.482	7.412	9.28267		62.117	68.8845	76.4013	7.454	8.266	9.168		61.1697	66.5263	77.1263	7.34033	7.983	9.25533
178	191	3	17.91	WGPGTLRLPNRALL		53.281	62.1645	71.129	5.328	6.2165	7.113		55.247	62.0285	70.736	5.5245	6.203	7.0735		53.878	61.7647	72.2577	5.388	6.17667	7.226		53.3417	60.7233	72.1567	5.354	5.474	7.21533		54.023	62.2195	71.7545	5.40233	6.222	7.1755		53.7703	60.555	73.5015	5.377	6.0555	7.35
183	191	2	13.54	LRLPNRALL		48.7	64.0195	75.9595	2.922	3.8415	4.5575		47.1877	63.3977	78.9933	2.83133	3.80367	4.73967		48.778	60.9143	75.003	2.927	3.65467	4.50033		48.5147	60.069	80.5963	3.254	2.854	4.83567		48.275	61.447	77.8297	2.89633	3.687	4.66967		50.0987	62.0983	75.9455	3.006	3.726	4.5565
192	200	2	7.94	VNVKFEGSE		26.424	34.5125	41.965	1.85	2.4155	2.93733		26.3767	34.5277	42.7583	1.84633	2.417	2.993		27.4435	34.3397	41.9737	1.921	2.404	2.938		26.6963	33.8413	42.692	1.949	1.894	2.98867		26.7547	34.4325	41.38	1.873	2.4105	2.89667		26.5863	34.4367	43.4635	1.86067	2.41033	3.0425
192	201	2	8.28	VNVKFEGSEE		27.1255	36.933	42.5653	2.17	2.9545	3.405		27.117	36.3213	44.9443	2.16933	2.90567	3.59533		26.868	34.162	42.472	2.1495	2.733	3.398		27.745	35.0697	44.9553	2.382	2.164	3.59633		27.5097	36.7725	42.2953	2.201	2.942	3.38367		27.1437	36.031	43.1053	2.17167	2.88233	3.44833
192	202	2	7.77	VNVKFEGSEES		31.627	42.234	48.351	2.8465	3.801	4.35167		32.007	41.852	48.6407	2.88067	3.76667	4.37733		33.123	42.0577	48.1317	2.9815	3.785	4.33167		32.001	43.4443	48.8657	3.057	2.932	4.39767		32.5163	41.729	47.6523	2.92667	3.7555	4.28867		32.201	41.7853	50.053	2.89833	3.76067	4.505
192	203	2	13.52	VNVKFEGSEESF		30.532	39.0745	43.9235	3.053	3.9075	4.3925		29.9537	38.278	44.87	2.99533	3.828	4.487		30.0295	37.4363	42.364	3.003	3.74367	4.236		30.89	38.275	44.842	3.124	2.977	4.484		31.295	38.296	44.345	3.12967	3.8295	4.43433		31.1043	38.5205	42.9905	3.11033	3.852	4.299
192	204	2	12.71	VNVKFEGSEESFT		31.8575	40.9485	45.0177	3.5045	4.5045	4.952		32.146	39.9427	45.9297	3.536	4.39367	5.05233		33.619	39.997	45.3983	3.698	4.39933	4.994		32.7007	38.6113	46.407	3.745	3.59	5.10467		32.551	40.8085	45.153	3.58067	4.489	4.96667		32.419	34.62	48.0085	3.56633	3.808	5.281
201	216	2	19.84	ESFTFQVSTKDVPLAL		16.1085	28.999	34.2067	2.0945	3.7695	4.447		18.0753	29.4263	35.4633	2.34967	3.82533	4.61		16.1035	28.9407	36.1853	2.0935	3.762	4.70433		16.7173	28.9417	37.2267	2.29	2.106	4.83967		17.9107	29.386	37.0077	2.32833	3.8205	4.811		16.2247	29.1887	37.8867	2.10933	3.79467	4.92533
203	216	2	19.61	FTFQVSTKDVPLAL		11.729	26.7115	33.1287	1.2905	2.938	3.64433		12.9497	27.1093	33.365	1.42467	2.982	3.67033		12.244	26.3297	33.348	1.347	2.896	3.668		12.5097	26.2533	34.1433	1.476	1.324	3.75567		12.0183	26.439	33.3153	1.32233	2.9085	3.66467		12.1683	26.792	34.492	1.33833	2.947	3.794
204	216	2	17.14	TFQVSTKDVPLAL		11.61	28.3095	35.6807	1.161	2.831	3.568		9.347	28.9677	35.8897	0.934667	2.897	3.58867		11.72	28.4427	35.6063	1.172	2.84433	3.56067		12.522	27.9937	36.1007	1.338	1.204	3.61		12.0547	28.3715	35.8133	1.20567	2.8375	3.581		12.0457	28.5663	37.357	1.20467	2.85633	3.736
205	216	2	16.83	FQVSTKDVPLAL		5.677	21.8145	30.8013	0.511	1.9635	2.77233		6.27133	23.867	31.471	0.564333	2.14833	2.83233		6.0435	22.8293	31.2717	0.544	2.05467	2.81433		6.152	23.0117	31.842	0.632	0.528	2.86567		5.08633	22.902	31.14	0.457667	2.0615	2.80267		5.63467	22.4273	30.6	0.507	2.01867	2.75433
205	217	2	18.58	FQVSTKDVPLALM		4.058	20.977	27.0373	0.4055	2.0975	2.70367		5.95467	21.777	27.2127	0.595333	2.17767	2.72133		4.011	19.3873	27.0727	0.401	1.93867	2.70733		4.7785	21.7817	31.8845	0.535	0.421	3.1885		5.557	19.912	27.6985	0.556	1.991	2.7695		5.1925	19.9713	31.771	0.5195	1.99733	3.177
206	216	2	14.06	QVSTKDVPLAL		7.5795	27.14	35.0617	0.6065	2.171	2.805		7.724	27.1323	34.7975	0.618333	2.17067	2.7835		7.426	26.4557	34.887	0.594	2.11633	2.791		9.599	25.9157	37.3297	0.632	0.99	2.98633		7.16633	26.1385	36.4865	0.573667	2.091	2.919		7.06533	26.6107	39.533	0.565333	2.12867	3.163
207	216	2	13.9	VSTKDVPLAL		5.386	21.4945	29.8977	0.377	1.5045	2.09267		5.907	20.1223	30.2605	0.4135	1.40833	2.1185		5.503	19.912	28.42	0.3855	1.39367	1.98967		4.548	20.3347	27.8523	0.38	0.256	1.95		5.00833	20.155	32.673	0.350667	1.4105	2.287		4.469	21.809	29.832	0.313	1.52667	2.0885
218	227	2	1.75	ACALRKKATV		14.2555	40.587	51.53	1.14	3.247	4.12233		22.2145	38.2953	51.6487	1.777	3.06333	4.13167		15.8195	39.8617	50.9553	1.2655	3.18867	4.07633		22.8417	38.3433	53.3153	1.882	2.045	4.26533		17.3443	39.465	50.7797	1.38733	3.1575	4.06233		15.9767	39.4963	52.3107	1.278	3.15967	4.185
219	227	2	0.88	CALRKKATV		20.543	43.033	57.9173	1.438	3.0125	4.054		24.59	45.862	59.7627	1.72133	3.21	4.18333		20.951	44.8357	54.124	1.4665	3.13833	3.78867		19.051	47.7593	57.836	1.641	1.026	4.0485		22.486	43.661	57.1093	1.574	3.056	3.99767		27.0317	45.0547	54.726	1.89233	3.15367	3.8305
219	238	3	8.43	CALRKKATVFRQPLVEQPED		38.744	51.2225	56.1207	6.199	8.196	8.97933		39.6347	51.6243	56.631	6.34167	8.25967	9.061		40.5245	50.949	56.4293	6.484	8.15167	9.02867		40.949	49.874	58.55	6.297	6.299	9.368		39.6897	51.0625	56.6907	6.35033	8.17	9.07033		41.146	50.6963	57.6613	6.58367	8.11167	9.22567
220	238	3	8.09	ALRKKATVFRQPLVEQPED		41.231	53.7985	59.2923	6.185	8.0695	8.89367		41.542	53.9663	59.924	6.2315	8.095	8.98867		42.1185	54.203	58.7143	6.318	8.13033	8.807		43.6523	52.763	60.1267	6.608	6.571	9.019		42.5733	53.764	58.3777	6.386	8.0645	8.75667		42.7263	53.5373	59.8053	6.409	8.03067	8.97067
221	238	3	8.26	LRKKATVFRQPLVEQPED		42.6595	55.5035	60.0847	5.972	7.7705	8.41167		43.3357	55.1023	57.8683	6.067	7.71467	8.10167		43.9065	54.631	58.562	6.147	7.648	8.19867		41.6933	52.5207	59.9693	5.878	5.968	8.396		43.544	55.2505	59.2663	6.09633	7.7355	8.297		43.338	52.4003	59.8143	6.06733	7.336	8.374
222	238	3	7.68	RKKATVFRQPLVEQPED		45.755	59.111	62.6953	5.948	7.6845	8.15067		47.91	59.2053	64.2537	6.2285	7.69667	8.35267		45.9745	57.9707	62.422	5.977	7.53633	8.11467		45.813	57.9423	63.9457	6.23	5.913	8.313		46.439	59.134	62.3633	6.03667	7.6875	8.10733		47.1023	57.9593	63.8653	6.12333	7.53467	8.30267
228	238	2	9.34	FRQPLVEQPED		53.0065	67.2025	74.8897	3.7105	4.7045	5.24233		52.7793	66.0673	75.904	3.69467	4.62467	5.313		52.332	65.749	73.3673	3.663	4.60267	5.13567		52.6733	64.955	75.216	3.82	3.626	5.265		52.737	65.525	74.1627	3.692	4.5865	5.19167		53.3873	66.503	75.9523	3.73733	4.655	5.31633
239	250	2	12.58	YTLQVNGRHEYL		3.037	3.428	4.10767	0.3035	0.343	0.411		3.558	3.42533	4.373	0.3555	0.342667	0.437333		3.3875	3.46467	4.14233	0.3385	0.346667	0.414333		3.07167	3.14833	4.464	0.356	0.332	0.446333		2.92233	3.4745	3.893	0.292333	0.3475	0.389333		2.97233	3.28167	4.626	0.297333	0.328	0.4625
239	254	3	14.1	YTLQVNGRHEYLYGSY		6.932	7.9435	11.1077	0.9705	1.112	1.555		6.63867	7.829	11.5217	0.929333	1.096	1.61333		6.882	9.80633	11.3143	0.9635	1.37267	1.584		6.586	7.049	11.9557	1.008	0.941	1.67367		6.45533	7.791	11.3587	0.903667	1.0905	1.59033		6.69333	7.67167	12.3755	0.937	1.074	1.7325
239	258	3	16.2	YTLQVNGRHEYLYGSYPLCQ		5.981	6.5535	9.29567	1.017	1.1145	1.58033		5.919	6.44333	9.87133	1.00633	1.09533	1.678		5.9835	6.56267	9.666	1.0175	1.11567	1.64333		8.70667	6.421	10.3403	1.074	1.005	1.758		5.99667	6.912	9.79133	1.01933	1.1755	1.66433		5.96033	6.66967	10.138	1.01333	1.134	1.72367
239	259	2	19.94	YTLQVNGRHEYLYGSYPLCQF		5.278	5.535	7.848	0.95	0.996	1.4125		5.346	5.736	8.68033	0.962333	1.03233	1.56233		5.1815	5.777	8.74667	0.9325	1.04	1.57433		5.37333	5.68967	9.35367	1.061	0.948	1.68367		5.379	6.64	8.604	0.968333	1.195	1.54867		5.36767	6.06233	10.0247	0.966	1.09133	1.80433
241	250	2	12.69	LQVNGRHEYL		4.392	5.9205	4.96767	0.3515	0.4735	0.397333		4.41533	6.863	5.015	0.353333	0.549	0.401333		6.769	6.53867	5.77667	0.5415	0.523	0.462333		6.461	4.394	6.95267	0.518	0.516	0.556333		3.22733	4.364	5.03933	0.258	0.349	0.403333		6.52233	4.686	9.14433	0.521667	0.375	0.731667
242	250	2	7.34	QVNGRHEYL		4.683	7.8685	5.949	0.328	0.551	0.4165		6.38433	4.419	4.3275	0.447	0.3095	0.303		3.588	7.63933	5.956	0.251	0.535	0.417		4.50367	6.9035	6.9805	0.319	0.482	0.489		6.20833	8.8405	4.86033	0.434667	0.619	0.340333		6.043	5.719	7.28867	0.423	0.4	0.51
242	259	3	19.07	QVNGRHEYLYGSYPLCQF		4.85	5.81	8.87133	0.7275	0.8715	1.33067		5.03467	6.89067	9.213	0.755333	1.034	1.382		5.3105	5.90267	8.89133	0.7965	0.885333	1.334		5.58767	6.06667	9.38833	0.964	0.782	1.40833		4.698	5.7115	8.949	0.705	0.8565	1.342		5.52833	6.09833	10.0815	0.829333	0.914667	1.512
251	258	1	13.44	YGSYPLCQ		9.4425	10.739	9.76267	0.472	0.537	0.488		7.06067	10.63	10.6283	0.353	0.531333	0.531333		11.671	10.6163	10.0147	0.5835	0.531	0.500667		10.9247	9.143	10.951	0.701	0.541	0.5475		11.353	11.6125	9.61033	0.5675	0.5805	0.480333		9.92733	10.369	9.933	0.496333	0.518333	0.497
251	259	2	20.27	YGSYPLCQF		5.1575	4.802	4.286	0.3095	0.2885	0.257333		6.59733	4.39633	4.69733	0.395667	0.264	0.282		5.815	5.254	3.49333	0.3485	0.315333	0.209667		6.773	5.421	4.18667	0.595	0.301	0.251333		5.92533	5.293	6.427	0.355667	0.3175	0.3855		4.0765	4.341	7.0645	0.2445	0.260333	0.424
259	264	1	13.32	FQYICS		16.7475	23.0265	25.03	0.6695	0.921	1.00133		17.8855	22.8303	24.9127	0.7155	0.913	0.996667		18.3225	22.1217	23.9507	0.7325	0.885	0.958		17.7873	22.1193	24.5983	0.75	0.663	0.983667		18.68	22.4915	24.3843	0.747	0.8995	0.975		17.362	22.418	25.057	0.694333	0.897	1.002
259	266	1	20.69	FQYICSCL		3.079	4.0445	5.225	0.1845	0.2425	0.314		4.5665	7.362	3.76	0.274	0.442	0.226		1.234	2.103	2.7365	0.074	0.126	0.1645		5.3225	8.075	5.034	0.302	0.337	0.302		1.575	4.156	5.104	0.094	0.249	0.3065		2.885	6.521	8.964	0.173	0.391	0.538
260	266	1	17.41	QYICSCL		0.6345	0.602	1.684	0.0315	0.03	0.0843333		0.441333	0.453	1.61733	0.0223333	0.0226667	0.0806667		0.5145	0.578333	1.58433	0.026	0.029	0.0793333		0.353667	0.552333	1.67267	0.022	0.016	0.084		0.737	0.668	1.95333	0.037	0.033	0.0976667		0.579667	0.542	2.197	0.0286667	0.0275	0.1095
265	274	2	10.56	CLHSGLTPHL		13.0785	15.756	21.173	0.9155	1.103	1.482		13.128	16.9023	21.9213	0.919	1.183	1.53433		13.239	16.0647	26.0113	0.927	1.12433	1.821		13.995	16.0493	21.2483	0.988	0.922	1.48733		13.312	16.377	25.0227	0.932	1.1465	1.75167		13.2663	16.3067	22.6817	0.928667	1.14133	1.58767
265	276	2	12.73	CLHSGLTPHLTM		10.308	27.56	39.7147	0.928	2.4805	3.57467		12.0013	26.336	37.597	1.08	2.37033	3.38367		9.786	25.173	35.9043	0.8805	2.26533	3.23133		12.0817	25.8797	40.088	1.035	1.002	3.60767		12.082	29.382	38.0283	1.08767	2.644	3.42267		12.172	28.3707	38.0657	1.09567	2.55333	3.426
265	283	3	14.19	CLHSGLTPHLTMVHSSSIL		4.045	4.377	4.73367	0.647	0.7005	0.757		4.06067	4.28267	4.95833	0.649667	0.685333	0.793333		4.404	4.12333	4.89167	0.705	0.659667	0.782667		3.67267	3.87833	5.07833	0.631	0.643	0.812667		3.972	3.938	4.62633	0.635667	0.63	0.740333		3.95367	3.97467	5.03467	0.632667	0.635667	0.805333
267	274	2	8.4	HSGLTPHL		16.806	20.801	27.273	0.8405	1.04	1.364		17.1867	20.906	28.2263	0.859333	1.04533	1.411		16.9265	21.586	26.5857	0.846	1.07933	1.329		16.7417	20.919	27.6233	0.87	0.819	1.381		17.1375	21.228	27.438	0.857	1.0615	1.37167		17.1077	21.025	28.633	0.855667	1.05133	1.432
267	283	3	13.26	HSGLTPHLTMVHSSSIL		4.0705	5.971	5.67	0.57	0.836	0.793667		4.22833	4.663	5.93933	0.592	0.652667	0.831667		4.3995	4.67467	6.04533	0.616	0.654333	0.846333		4.34167	4.62767	6.35733	0.664	0.62	0.89		4.135	4.991	7.031	0.579	0.699	0.984333		4.40267	4.75433	5.97367	0.616333	0.665333	0.836333
267	284	3	12.55	HSGLTPHLTMVHSSSILA		4.2085	4.275	6.50367	0.6315	0.6415	0.975667		4.81733	4.81733	7.15733	0.722667	0.722333	1.07333		4.4695	4.99033	6.41467	0.6705	0.748667	0.962		4.74267	4.80833	7.44433	0.783	0.699	1.11667		3.848	4.7195	6.781	0.577333	0.708	1.017		4.30433	4.832	7.059	0.645667	0.725	1.059
275	283	2	11.22	TMVHSSSIL		0.3705	1.397	4.43467	0.026	0.0975	0.310667		0.623	1.40533	4.474	0.0436667	0.0983333	0.313333		0.3625	0.922333	3.80967	0.025	0.0646667	0.266667		-0.198667	1.29867	4.39767	0.045	-0.044	0.307667		0.449667	1.3535	3.97133	0.0313333	0.095	0.278		0.286	1.17533	6.141	0.02	0.082	0.43
277	283	1	8.93	VHSSSIL		3.8115	5.419	7.794	0.1905	0.271	0.389667		4.07767	5.28967	11.42	0.203667	0.264333	0.571		2.8765	3.88567	8.34067	0.144	0.194333	0.417333		2.74367	3.182	10.2997	0.151	0.165	0.515		2.55567	5.2065	8.05333	0.128	0.2605	0.402667		3.73167	3.78067	8.682	0.186667	0.189	0.434333
286	316	5	6.6	RDEQSNPAPQVQKPRAKPPPIPAKKPSSVSL		65.732	67.509	67.4457	13.8035	14.1765	14.1637		65.7277	67.365	67.422	13.8027	14.1467	14.159		67.2295	67.907	67.5907	14.118	14.2603	14.194		65.2987	66.6507	67.7793	14.072	13.875	14.2337		66.0833	69.0785	66.3433	13.8777	14.5065	13.932		66.107	67.232	67.1693	13.8827	14.1187	14.1057
294	316	4	6.83	PQVQKPRAKPPPIPAKKPSSVSL		77.7545	77.9525	75.928	11.663	11.693	11.3893		75.8073	76.9847	77.047	11.371	11.5477	11.557		76.0715	78.4243	76.6753	11.411	11.7633	11.5013		75.1763	76.41	76.573	11.324	11.467	11.486		76.674	80.412	77.6157	11.501	12.062	11.6423		75.9563	75.9113	76.6863	11.3933	11.3867	11.503
317	327	2	21.01	WSLEQPFRIEL		9.046	15.0945	26.9213	0.724	1.2075	2.15367		11.0157	16.1427	23.7887	0.881	1.29133	1.90333		9.98	14.653	23.6877	0.7985	1.17233	1.89533		9.16133	14.861	24.3457	0.791	0.756	1.94733		9.56433	14.951	24.212	0.765	1.196	1.93733		10.556	15.1273	24.4843	0.844333	1.21	1.95867
328	337	2	2.02	IQGSKVNADE		9.1985	29.353	46.0037	0.736	2.348	3.68		11.345	30.3223	47.384	0.908	2.42567	3.791		10.391	29.9787	46.7567	0.8315	2.39833	3.74033		10.8863	30.037	47.3237	1.055	0.733	3.786		10.019	28.498	43.87	0.801333	2.2795	3.5095		10.209	30.7833	46.9397	0.816667	2.46267	3.75533
426	439	3	12.94	FDYKDQLKTGERCL		15.1165	26.499	32.2673	1.814	3.18	3.872		15.6937	26.865	31.3727	1.88333	3.22367	3.76467		15.836	28.148	31.662	1.9005	3.37767	3.79967		18.0003	28.9743	33.0937	2.02	1.936	3.971		16.609	26.0875	33.096	1.99333	3.1305	3.97133		16.206	27.032	31.4817	1.945	3.24367	3.77767
428	438	3	3.77	YKDQLKTGERC		34.607	46.053	52.403	3.1145	4.1445	4.716		35.3377	48.101	55.4827	3.18033	4.329	4.99333		36.6205	46.432	53.0677	3.2955	4.179	4.77633		35.941	46.511	55.905	3.354	3.186	5.03133		35.7743	46.0925	51.2587	3.22	4.1485	4.613		35.2555	47.5927	56.0947	3.173	4.28333	5.04833
453	471	2	9.32	LNPTGTVRSNPNTDSAAAL		24.529	40.8495	54.857	3.6795	6.1275	8.22833		24.7733	42.048	54.3123	3.716	6.307	8.14667		25.267	41.2193	51.4145	3.79	6.18267	7.712		24.8527	40.1977	55.2297	4.313	3.66	8.28433		26.4783	42.529	51.571	3.97167	6.3795	7.73567		25.8403	41.1923	53.246	3.876	6.179	7.98667
473	485	2	17.07	ICLPEVAPHPVYY		43.0635	56.127	67.216	3.445	4.4905	5.37733		41.1267	54.7597	67.6453	3.29	4.38067	5.41167		38.5465	53.3123	67.4417	3.084	4.265	5.39533		40.3503	55.2743	67.4697	3.308	3.128	5.39767		39.4067	54.0205	71.3877	3.15267	4.3215	5.711		43.951	53.9427	66.5473	3.516	4.31533	5.32367
473	488	2	18.9	ICLPEVAPHPVYYPAL		25.942	38.384	48.6743	2.5945	3.8385	4.86733		27.2763	38.5427	49.682	2.72767	3.85467	4.96833		26.6505	38.0813	51.0437	2.665	3.808	5.10433		27.853	38.4333	52.286	2.775	2.632	5.229		27.8643	38.2945	52.39	2.78667	3.8295	5.239		27.1533	37.8687	52.7253	2.71533	3.787	5.27233
476	488	2	15.6	PEVAPHPVYYPAL		11.8965	25.9405	28.417	0.952	2.0755	2.27333		12.5875	23.9643	27.2673	1.007	1.917	2.18133		13.228	25.5055	25.9195	1.0585	2.0405	2.0735		14.3895	26.426	29.88	1.235	1.068	2.39033		10.9195	26.232	29.192	0.8735	2.099	2.3355		11.3247	27.828	27.977	0.906	2.22633	2.238
489	494	1	14.67	EKILEL		0.8425	2.645	16.2553	0.0335	0.106	0.650333		1.18233	2.27733	16.8383	0.0473333	0.091	0.673667		0.731	0.75	12.1387	0.0295	0.03	0.485333		-0.94	1.116	9.242	0	-0.063	0.3695		0.456333	1.945	12.2763	0.0183333	0.0775	0.491333		0.696	2.68067	13.2403	0.028	0.107333	0.529667
489	499	3	7.81	EKILELGRHSE		2.931	7.7305	17.5203	0.264	0.6955	1.57667		3.16533	7.78533	18.3713	0.284667	0.700667	1.65333		3.4285	7.88567	18.0573	0.3085	0.71	1.625		3.09933	7.71333	18.4847	0.351	0.261	1.66367		2.76033	7.9815	16.7993	0.248333	0.7185	1.512		3.18633	7.9	19.195	0.287	0.711	1.7275
489	500	2	8.68	EKILELGRHSEC		7.4555	11.6585	19.6957	0.7455	1.166	1.96933		7.39133	11.468	20.2497	0.739	1.147	2.02467		8.118	11.5603	19.8253	0.812	1.156	1.98233		8.25933	11.0907	20.214	0.809	0.779	2.02133		7.70467	11.417	19.6447	0.770333	1.1415	1.96433		7.925	11.4867	20.43	0.792333	1.14867	2.043
489	505	2	9.61	EKILELGRHSECVHVTE		17.2825	20.4175	28.1167	2.5925	3.0625	4.21767		17.0527	20.1803	28.5593	2.558	3.027	4.28367		17.8485	20.1873	28.3453	2.677	3.02833	4.252		18.0363	19.6983	29.397	2.749	2.629	4.40967		17.029	20.6655	28.817	2.55433	3.0995	4.3225		17.112	20.3467	28.1987	2.567	3.052	4.22967
489	506	2	9.66	EKILELGRHSECVHVTEE		16.7645	20.377	27.554	2.682	3.2605	4.40867		18.0115	20.203	27.9533	2.882	3.23267	4.47233		17.536	20.7735	27.9983	2.806	3.3235	4.48		17.2543	18.5665	27.6267	2.915	2.775	4.42033		17.6823	21.2945	28.3705	2.829	3.407	4.539		17.1373	20.242	29.71	2.742	3.23867	4.754
489	508	3	9.56	EKILELGRHSECVHVTEEEQ		16.389	20.273	28.382	2.95	3.649	5.10867		16.0423	19.4623	28.349	2.88767	3.503	5.10267		17.0315	19.786	28.3243	3.0655	3.56133	5.09867		16.177	20.0583	30.07	3.111	2.929	5.41267		16.32	19.745	27.6977	2.93767	3.554	4.98533		15.9873	19.57	29.4973	2.87767	3.52267	5.30933
490	500	2	7.53	KILELGRHSEC		5.9995	8.374	17.9433	0.54	0.754	1.61533		6.72167	8.968	19.0043	0.605	0.807333	1.71067		5.1575	8.955	18.2307	0.4645	0.806	1.64067		6.53533	8.594	19.3693	0.534	0.601	1.74333		8.906	9.388	17.406	0.801333	0.845	1.56633		6.74933	9.23933	18.323	0.607333	0.831667	1.64933
494	505	3	4.19	LGRHSECVHVTE		27.1285	30.284	35.1783	2.713	3.0285	3.51767		27.7453	29.9535	35.8643	2.77467	2.995	3.58633		29.38	29.8585	35.4677	2.938	2.986	3.547		27.4	29.9137	36.4937	2.873	2.79	3.64933		28.0147	30.059	34.4167	2.80133	3.006	3.44133		27.8217	30.1017	36.2255	2.78233	3.01	3.6225
494	506	3	4.35	LGRHSECVHVTEE		26.8565	30.4165	34.679	2.954	3.346	3.81467		26.9537	31.238	35.2707	2.965	3.436	3.87967		29.206	31.5357	35.0347	3.213	3.469	3.85367		28.1023	30.4917	35.4047	3.142	3.004	3.89433		27.569	30.797	33.9457	3.03267	3.388	3.734		26.9003	30.829	34.4097	2.95933	3.39133	3.78467
494	508	3	4.52	LGRHSECVHVTEEEQ		22.7585	26.214	34.0903	2.959	3.4075	4.43167		22.675	26.546	34.7357	2.94767	3.451	4.51533		23.989	27.0767	34.3093	3.1185	3.52	4.46		23.0623	26.8193	35.4157	3.145	3.009	4.604		22.938	26.735	33.9437	2.98167	3.4755	4.41267		23.0927	26.353	34.859	3.00233	3.42633	4.53167
495	506	3	3.31	GRHSECVHVTEE		31.801	34.7185	39.8927	3.18	3.472	3.989		31.1917	35.7173	40.3413	3.11933	3.57167	4.03433		33.1595	35.788	41.4597	3.316	3.579	4.14567		32.551	35.059	42.229	3.346	3.173	4.223		32.3733	37.459	39.706	3.23733	3.746	3.97067		34.822	35.3503	41.7723	3.482	3.535	4.17733
500	508	2	3.78	CVHVTEEEQ		30.0655	37.4785	54.004	2.1045	2.6235	3.78033		31.0237	36.8993	55.4473	2.17167	2.583	3.88133		31.725	38.715	53.8877	2.2205	2.71033	3.772		30.222	38.1887	56.8113	2.297	2.156	3.97667		30.681	37.9685	53.602	2.14767	2.6575	3.7525		30.5763	38.0337	54.754	2.14033	2.66267	3.83267
501	506	1	2.22	VHVTEE		46.4025	55.0035	67.6757	1.8565	2.2	2.707		46.019	56.8067	71.206	1.84067	2.272	2.848		49.114	55.8643	67.0467	1.9645	2.23467	2.682		48.8193	57.0615	69.3167	1.958	1.989	2.77267		46.9237	57.077	67.7617	1.87667	2.283	2.71067		47.1253	53.935	68.758	1.885	2.15733	2.75033
501	508	1	2.54	VHVTEEEQ		29.333	37.861	57.747	1.76	2.2715	3.465		30.783	39.2153	59.2493	1.847	2.35267	3.555		31.8635	39.5063	57.9383	1.9115	2.37	3.47633		30.959	37.0535	59.614	1.961	1.842	3.5765		31.3657	39.3575	56.813	1.88167	2.3615	3.40867		30.5343	39.485	59.134	1.832	2.369	3.548
501	511	2	13.45	VHVTEEEQLQL		12.9365	18.7545	46.253	1.1645	1.688	4.16267		13.0173	18.776	48.6283	1.17167	1.69	4.37667		13.945	19.3697	41.1693	1.255	1.743	3.70533		12.8927	18.5533	45.7057	1.268	1.194	4.11333		12.9637	18.593	45.0617	1.167	1.673	4.05533		12.611	18.6757	47.7325	1.135	1.68067	4.296
512	523	2	7.32	REILERRGSGEL		26.6035	31.0885	31.208	2.66	3.109	3.121		26.2497	30.7363	31.7193	2.62533	3.07367	3.17167		28.4435	31.477	31.7597	2.8445	3.14733	3.176		26.61	30.0213	32.3993	2.799	2.732	3.24		27.1583	31.3605	30.841	2.71567	3.136	3.084		26.7293	30.5653	31.519	2.67267	3.05633	3.15167
524	549	4	18.97	YEHEKDLVWKLRHEVQEHFPEALARL		3.3315	8.3785	9.92567	0.7665	1.927	2.283		2.405	6.45	9.70333	0.553	1.48367	2.23167		3.0505	6.648	10.337	0.7015	1.529	2.37767		3.14167	5.81433	12.9023	0.862	0.628	2.96767		4.507	6.2045	10.4517	1.03667	1.427	2.40367		2.75733	6.29967	11.4547	0.634333	1.449	2.63467
526	546	4	17.61	HEKDLVWKLRHEVQEHFPEAL		2.8445	7.502	11.2747	0.512	1.3505	2.02933		2.68567	7.626	11.3427	0.483	1.37267	2.04167		2.763	7.462	14.088	0.4975	1.34333	2.536		3.659	7.1	11.6443	0.575	0.354	2.096		2.603	7.6985	11.632	0.468667	1.3855	2.09367		2.57667	8.23933	11.9905	0.463667	1.483	2.1585
550	564	2	11.35	LLVTKWNKHEDVAQM		0.724	4.04	5.7405	0.094	0.525	0.7465		1.6575	4.684	5.535	0.2155	0.609	0.7195		1.4095	3.0535	4.74567	0.1835	0.397	0.616667		1.81	3.55	5.29233	0.238	0.232	0.688		0.659	5.408	5.1045	0.086	0.703	0.6635		1.766	6.188	6.1865	0.23	0.804	0.804
550	565	3	15.35	LLVTKWNKHEDVAQML		-0.116	1.303	2.20467	-0.016	0.1825	0.308333		-0.0296667	1.24467	2.55867	-0.00433333	0.174333	0.358		-0.002	1.24467	2.33567		0.174333	0.327333		-0.032	1.224	2.72033	0.051	-0.015	0.380667		0.704667	1.754	2.794	0.0986667	0.2455	0.391		0.083	1.39467	3.5825	0.0113333	0.195	0.5015
569	574	1	19.09	CSWPEL		-0.393	18.709	38.878	-0.0115	0.5615	1.166		0.041	17.5747	41.6503	0.0015	0.527667	1.24933		-0.4825	16.9347	40.7637	-0.0145	0.508	1.22267		-1.08933	16.3547	40.9787	-0.004	-0.056	1.22933		0.78	16.3125	37.1337	0.023	0.4895	1.11433		0.506333	18.2487	42.534	0.0153333	0.547333	1.276
583	595	2	20.72	LDFSFPDCHVGSF		5.8205	16.781	32.7867	0.582	1.678	3.27833		6.6175	17.0827	31.9707	0.6615	1.708	3.197		6.172	17.0777	33.555	0.617	1.708	3.35533		6.60333	16.5713	34.011	0.744	0.555	3.401		6.439	16.9135	30.2037	0.644	1.691	3.02033		6.71	16.9487	32.6393	0.671333	1.695	3.264
585	595	2	19.41	FSFPDCHVGSF		3.968	12.0035	24.926	0.3175	0.96	1.99367		3.99033	10.3717	24.9887	0.319333	0.829667	1.999		4.7	10.8937	25.8447	0.376	0.871333	2.06767		4.54867	10.5793	26.3833	0.442	0.404	2.111		4.936	9.6345	24.3133	0.394667	0.7705	1.94533		5.492	10.3457	26.191	0.439	0.827667	2.0955
596	608	2	11.26	AIKSLRKLTDDEL		8.825	11.1495	15.3063	0.9705	1.2265	1.68367		6.58133	11.6273	16.8143	0.723667	1.279	1.84967		8.4815	12.4213	16.1513	0.933	1.36633	1.77667		7.11233	10.9687	18.2583	0.763	0.791	2.00833		7.582	12.1345	16.5117	0.834333	1.335	1.81633		6.77733	9.85633	17.8987	0.745667	1.08433	1.969
609	614	1	16.86	FQYLLQ		0.4425	1.062	1.21433	0.018	0.0425	0.0483333		1.5415	1.73167	2.095	0.0615	0.0693333	0.0836667		0.559	0.479333	1.009	0.0225	0.019	0.0403333		1.27267	0.859	2.453	0.061	0.045	0.098		0.506667	0.4345	1.717	0.0203333	0.017	0.069		2.315	0.629333	2.4955	0.0923333	0.025	0.0995
615	625	2	18.4	LVQVLKYESYL		11.9135	21.455	28.443	1.072	1.931	2.55967		11.9433	21.1123	28.8077	1.075	1.90033	2.59267		12.441	20.7597	27.8733	1.1195	1.86833	2.50867		12.3627	20.9453	28.4587	1.139	1.078	2.561		12.1763	21.2355	26.9897	1.096	1.911	2.429		11.382	21.018	27.985	1.02467	1.89167	2.51867
616	624	2	11.98	VQVLKYESY		14.118	24.545	24.9733	0.9885	1.7185	1.74833		14.8953	24.25	24.8387	1.04267	1.69733	1.73867		14.2655	24.0537	25.601	0.9985	1.68367	1.79233		13.1713	23.9467	26.856	1.035	0.931	1.87967		15.0493	24.554	24.8415	1.05333	1.719	1.739		14.2717	24.3227	26.639	0.999333	1.70233	1.865
616	625	2	16.62	VQVLKYESYL		12.876	23.1885	30.25	1.03	1.855	2.42		13.5425	23.1507	31.434	1.0835	1.852	2.51467		13.469	23.1007	30.5475	1.0775	1.848	2.4435		14.6327	22.819	31.347	1.139	1.054	2.50767		12.974	22.8415	30.527	1.038	1.8275	2.442		12.839	23.0947	30.7897	1.02733	1.84733	2.463
616	627	2	16.74	VQVLKYESYLDC		8.635	17.7475	30.5067	0.8635	1.7745	3.05067		9.53633	18.39	30.1137	0.953667	1.83933	3.01133		9.479	18.235	30.183	0.948	1.82367	3.018		11.8043	19.4385	30.094	1.13	1.144	3.0095		8.724	17.628	30.1545	0.872	1.7625	3.0155		14.201	17.7817	31.4643	1.42	1.77833	3.14633
628	634	2	18.5	ELTKFLL		-0.799	-0.2915	0.194667	-0.04	-0.0145	0.01		-0.533	0.263667	0.167333	-0.0263333	0.0133333	0.00833333		-1.41	-0.0203333	-0.249	-0.0705	-0.00133333	-0.0123333		-1.15033	-0.396667	-0.497333	-0.093	-0.056	-0.025
628	647	3	16.98	ELTKFLLDRALANRKIGHFL		0.062	1.0175	1.45967	0.011	0.183	0.262667		0.6595	1.288	1.45467	0.119	0.232	0.262		0.3725	1.08433	1.193	0.067	0.195	0.215		0.934333	0.900333	1.54167	0.147	0.15	0.277667		1.01867	0.913	1.11567	0.183667	0.1645	0.201		0.365667	0.829667	1.506	0.066	0.149667	0.271
629	646	3	13.71	LTKFLLDRALANRKIGHF		0.8775	2.1815	1.26	0.1405	0.349	0.201667		0.742	2.63867	1.354	0.119	0.422	0.216667		0.2455	1.119	1.176	0.039	0.179	0.188333		0.051	0.766667	1.873	0	0.054	0.299667		1.28167	0.7025	1.97767	0.205333	0.1125	0.316333		1.15633	1.371	1.96567	0.185	0.219	0.314333
630	635	1	13.76	TKFLLD		-0.034	-1.458	-0.312333	-0.0015	-0.058	-0.0126667		-0.211667	-0.190333	-0.579667	-0.00833333	-0.00733333	-0.0233333		-0.06	0.520667	0.102333	-0.0025	0.021	0.004		2.714	-0.48	0.642333	0.079	-0.044	0.0256667		0.469333	0.724	-0.599667	0.019	0.029	-0.024		0.289667	-0.144667	-0.399333	0.0113333	-0.006	-0.0156667
630	646	3	13.14	TKFLLDRALANRKIGHF		0.9515	1.263	2.61933	0.1425	0.1895	0.393		0.798333	1.937	2.794	0.119667	0.290667	0.419		0.8545	1.52833	2.7	0.1285	0.229333	0.405333		0.837333	1.47767	2.91067	0.192	0.02	0.436333		0.765667	1.731	2.45	0.114667	0.2595	0.3675		0.538667	1.74567	3.243	0.0806667	0.262	0.486333
630	647	3	15.42	TKFLLDRALANRKIGHFL		0.9	1.822	1.21933	0.144	0.2915	0.195333		0.871667	2.33067	1.30033	0.139333	0.373	0.208		0.4285	0.476	0.333	0.0685	0.0763333	0.0533333		-1.18	1.775	2.67733	0	-0.189	0.428333		2.015	0.5495	2.01567	0.3225	0.088	0.322667		2.238	2.164	1.93467	0.3585	0.346333	0.309667
633	646	3	10.44	LLDRALANRKIGHF		0.483	2.206	3.986	0.058	0.265	0.478333		0.651333	2.377	4.322	0.0783333	0.285	0.5185		0.917	2.12167	3.921	0.11	0.254667	0.4705		0.888	1.6505	3.85133	0.156	0.096	0.462		0.818333	1.704	3.611	0.0983333	0.2045	0.433		1.01067	2.15533	4.35133	0.121	0.258667	0.522333
633	647	2	13.01	LLDRALANRKIGHFL		0.6315	1.078	1.35233	0.082	0.14	0.175667		0.562	1.345	1.534	0.073	0.174667	0.199333		0.3265	1.17833	1.35967	0.0425	0.153333	0.176667		0.474667	1.126	1.85833	0.04	0.062	0.241333		0.511667	0.6625	1.494	0.0666667	0.086	0.194333		0.551667	0.885333	1.579	0.072	0.115333	0.205333
633	651	4	18.75	LLDRALANRKIGHFLFWHL		0.812	0.125	0.729667	0.138	0.021	0.124		0.529	0.841	0.771	0.09	0.143	0.131		0.5925	0.999	0.689667	0.101	0.17	0.117333		0.667	0.767	1.1635	0.156	0.071	0.198		0.394667	0.413	0.501	0.067	0.07	0.085		0.789	0.6195	1.0495	0.134	0.1055	0.1785
635	646	3	7.15	DRALANRKIGHF		1.0575	2.333	5.027	0.106	0.233	0.502667		0.182	0.752333	4.177	0.0183333	0.0753333	0.417667		1.399	2.102	4.71433	0.14	0.2105	0.471333		0.751333	2.13633	5.527	0.075	0.081	0.552667		-0.257667	2.7425	4.54267	-0.0256667	0.274	0.454333		0.491333	2.28167	5.142	0.0735	0.228	0.514
636	646	2	5.67	RALANRKIGHF		0.6435	2.3125	4.316	0.0575	0.208	0.388333		1.354	3.20033	4.4845	0.121667	0.288	0.4035		0.335	2.49433	5.112	0.03	0.224333	0.460333		0.524667	2.11	2.50433	0.109	0.037	0.225667		0.763333	1.697	2.37867	0.0686667	0.1525	0.214333		0.868667	2.57267	2.979	0.078	0.231667	0.268333
647	655	2	17.01	LFWHLRSEM		0.826	3.496	0.327667	0.058	0.245	0.0233333		0.417333	2.53433	0.0686667	0.0293333	0.177333	0.00466667		2.4285	0.588	0.4645	0.17	0.0413333	0.0325		0.058	0.226667	1.29233	0.075	-0.04	0.0906667		1.727	0.093	1.25667	0.121	0.006	0.088		1.38133	0.998667	1.795	0.0966667	0.07	0.126
648	655	2	14.83	FWHLRSEM		-2.362	-2.3785	-2.77867	-0.1415	-0.1425	-0.166667		-2.86467	-2.06233	-2.82867	-0.172	-0.123667	-0.169667		-3.2805	-3.577	-3.2385	-0.197	-0.2145	-0.1945		-5.6965	-2.92467	-3.332	0	-0.337	-0.2		-2.94967	-2.653	-1.118	-0.177	-0.159	-0.067		-2.228	-3.1285	-2.277	-0.133667	-0.1875	-0.136667
652	661	2	8.26	RSEMHVPSVA		14.431	15.4125	18.1977	1.01	1.079	1.27367		14.136	14.446	18.968	0.989667	1.01133	1.32767		14.616	14.51	17.2393	1.023	1.01567	1.207		13.014	13.4393	18.4753	0.998	0.893	1.29333		15.5623	15.633	19.8857	1.08967	1.0945	1.392		17.2633	14.4977	23.6785	1.20867	1.01467	1.6575
656	661	1	3.15	HVPSVA		26.787	28.516	37.731	0.8035	0.8555	1.132		25.9363	28.4867	40.584	0.778333	0.854333	1.21767		26.769	28.2247	36.4163	0.803	0.846667	1.09267		27.584	28.9243	36.5557	0.796	0.81	1.09633		27.316	28.248	36.666	0.819333	0.8475	1.1		26.7103	29.3567	38.089	0.801333	0.880667	1.14267
662	668	2	20.81	LRFGLIL		0.9365	0.5295	0.555333	0.047	0.0265	0.0276667		0.186667	0.0176667	0.000333333	0.00933333	0.001	-2.89121e-19		0.6965	0.632	0.647	0.035	0.0316667	0.0323333		0.0326667	0.0293333	0.0906667	0.03	0.003	0.00433333		-0.631333	0.5465	0.092	-0.0313333	0.0275	0.0045		-1.878	0.1385	-0.133667	-0.0935	0.007	-0.007
662	669	2	19.96	LRFGLILE		0.501	0.5475	0.215	0.03	0.033	0.013		0.145333	0.485	0.259	0.00866667	0.029	0.0156667		0.6835	0.670667	0.310333	0.041	0.0403333	0.0186667		0.444333	0.281667	-0.233667	0.066	0.007	-0.014		0.335667	-0.282	0.202667	0.02	-0.0165	0.0123333		0.142	0.172333	0.3655	0.00866667	0.01	0.022
662	670	2	20.34	LRFGLILEA		1.0215	0.588	0.518333	0.0715	0.0415	0.0363333		0.478667	0.375	0.666667	0.0333333	0.0263333	0.0466667		1.0665	0.330333	0.494667	0.075	0.0233333	0.0346667		0.661333	-0.02	0.907667	0.112	0.012	0.0633333		0.541667	0.488	0.815667	0.0376667	0.0345	0.0573333		-0.771333	0.647	0.810667	-0.054	0.045	0.0563333
663	668	1	19.79	RFGLIL		0.2815	-0.0765	-0.262333	0.0115	-0.003	-0.0106667		0.185667	-0.306	-0.211333	0.00766667	-0.012	-0.00833333		-0.7085	-0.218333	-0.22	-0.028	-0.00866667	-0.00866667		-0.207	-0.0535	4.23667	-0.006	-0.059	0.169333		0.239667	-0.3445	0.756333	0.00966667	-0.0135	0.0303333		-0.0733333	0.564	-0.339	-0.00266667	0.0225	-0.014
669	682	3	6.03	EAYCRGSTHHMKVL		0.995	4.899	7.62367	0.119	0.588	0.915		1.65133	3.683	8.422	0.198333	0.442	1.011		5.714	3.4565	7.90567	0.686	0.415	0.948667		1.018	3.5855	8.24233	-0.061	0.331	0.989333		0.9235	2.911	7.586	0.111	0.349	0.910333		1.41167	3.552	11.309	0.169333	0.426	1.357
671	683	3	6.5	YCRGSTHHMKVLM		1.7595	2.6555	8.952	0.1935	0.292	0.985		1.7395	2.265	9.147	0.191	0.249	1.006		2.2175	2.99	8.41867	0.2435	0.328667	0.926		2.32733	3.71233	9.048	0.293	0.037	0.995333		1.78133	3.6605	8.8	0.196	0.403	0.968		0.854	3.49067	7.537	0.094	0.383667	0.829
683	692	2	9.19	MKQGEALSKL		3.704	3.4215	5.55833	0.296	0.2735	0.445		3.23333	2.5425	8.4865	0.258667	0.2035	0.6785		2.2575	2.53333	4.67367	0.181	0.202667	0.374		3.96867	2.296	5.92967	0.13	0.126	0.474333		5.00133	4.158	5.75367	0.4	0.333	0.46		3.927	2.76333	8.012	0.314333	0.221333	0.641
684	692	2	7.58	KQGEALSKL		0.718	0.962	4.77533	0.05	0.0675	0.334333		0.410667	1.339	5.219	0.029	0.0936667	0.365333		0.8905	1.04667	2.55367	0.062	0.073	0.178667		0.422667	1.19433	3.056	0.072	0.02	0.213667		0.432333	1.1945	4.10233	0.03	0.0835	0.287		0.628333	1.35167	4.67233	0.044	0.0943333	0.327
684	697	3	8.77	KQGEALSKLKALND		1.3585	1.7	3.391	0.163	0.204	0.407		1.28167	1.78333	4.13233	0.153667	0.214	0.495667		1.1425	1.23	2.37033	0.137	0.1475	0.284667		1.47167	1.59567	2.797	0.246	0.17	0.335667		1.79167	0.943	2.80367	0.214667	0.113	0.336667		1.55967	1.68467	4.018	0.187333	0.202	0.482
689	697	2	6.54	LSKLKALND		1.946	2.146	1.938	0.136	0.15	0.135667		2.422	2.49167	3.58	0.169333	0.174333	0.250667		1.862	2.13733	1.68433	0.1305	0.149667	0.118		2.02967	2.58067	3.02167	0.191	0.1	0.211667		2.314	1.6675	2.06633	0.162	0.117	0.144667		2.36767	2.58433	3.61633	0.165667	0.181	0.253333
690	697	2	3.65	SKLKALND		1.2285	1.4855	1.76367	0.0735	0.089	0.105667		1.758	2.007	2.013	0.105333	0.120333	0.120667		1.697	1.80167	1.60667	0.102	0.108	0.0963333		1.28933	1.79967	1.76267	0.139	0.066	0.105667		1.58467	1.635	1.83667	0.095	0.098	0.110333		1.54333	1.94367	1.56133	0.0926667	0.116667	0.0936667
690	698	2	11.81	SKLKALNDF		1.5295	1.034	0.703667	0.107	0.0725	0.0493333		0.82	1.479	1.36467	0.0573333	0.103333	0.0953333		1.2135	1.30233	1.38333	0.0845	0.0913333	0.0966667		1.55533	1.325	1.19967	0.145	0.056	0.084		1.45933	1.1635	1.30167	0.102	0.0815	0.091		1.29167	1.121	1.511	0.0903333	0.0786667	0.106
698	713	2	4.11	FVKLSSQKTPKPQTKE		22.6235	38.9975	47.2933	2.7145	4.6795	5.67533		22.9597	39.8313	47.8257	2.75533	4.77967	5.739		26.0595	42.3763	49.3727	3.1275	5.08533	5.92467		25.9433	42.1057	49.5457	3.243	3.055	5.94533		26.7393	44.2615	49.4283	3.20867	5.311	5.93167		26.6147	43.5657	50.1597	3.19367	5.228	6.019
698	713	3	4.11	FVKLSSQKTPKPQTKE		21.7975	38.82	46.649	2.616	4.658	5.5975		22.6037	38.959	48.0043	2.71233	4.67533	5.76067		25.067	42.069	48.889	3.008	5.04833	5.867		25.223	41.8797	49.27	3.211	2.898	5.91233		26.562	44.7955	49.3227	3.18733	5.3755	5.91867		26.3243	43.7343	50.0663	3.159	5.24833	6.00767
698	717	4	9.92	FVKLSSQKTPKPQTKELMHL		10.214	16.8825	21.1277	1.634	2.7015	3.38033		11.0413	17.0613	21.262	1.767	2.72967	3.402		11.703	18.413	23.095	1.8725	2.94633	3.695		11.7937	17.9603	23.514	1.985	1.812	3.76233		12.2767	19.7425	23.3297	1.96433	3.159	3.733		12.1213	18.609	24.4193	1.93967	2.97733	3.907
698	719	3	12.79	FVKLSSQKTPKPQTKELMHLCM		8.482	13.397	16.1967	1.527	2.4115	2.91533		8.36567	13.7637	16.3647	1.506	2.47767	2.94567		9.4145	14.297	18.4347	1.6945	2.57367	3.31833		9.10833	13.739	18.72	1.727	1.632	3.36933		9.25867	14.1955	18.049	1.66667	2.5555	3.249		9.43033	14.141	18.4775	1.69733	2.54533	3.326
699	713	3	1.8	VKLSSQKTPKPQTKE		25.4195	45.5465	56.295	2.7965	5.01	6.19267		26.8193	46.8987	56.1613	2.95033	5.15867	6.17767		29.653	50.2993	58.3797	3.262	5.533	6.422		29.145	49.6153	57.91	3.372	3.064	6.37		31.4887	52.1335	58.09	3.46367	5.7345	6.39		31.2707	51.17	58.067	3.43967	5.62867	6.38733
699	713	4	1.8	VKLSSQKTPKPQTKE		25.058	46.2975	56.5923	2.7565	5.0925	6.225		28.3217	47.3897	57.2463	3.11533	5.213	6.297		31.241	49.9987	57.978	3.4365	5.5	6.37733		31.8355	49.7877	58.4643	3.622	3.381	6.431		32.0403	52.0645	58.1255	3.52433	5.727	6.394		32.013	52.0417	58.8283	3.52167	5.72467	6.471
720	725	1	9.21	RQEAYL		34.008	39.2285	61.2473	1.3605	1.569	2.45		33.802	39.835	65.305	1.352	1.59333	2.61233		35.2635	38.5447	58.907	1.4105	1.54133	2.35633		34.0147	38.3723	63.3433	1.397	1.379	2.53367		34.5623	38.761	59.8837	1.38267	1.5505	2.395		34.1233	39.2523	64.2733	1.365	1.57	2.571
720	727	2	8.96	RQEAYLEA		24.439	45.233	64.2617	1.466	2.714	3.856		25.4873	46.3793	67.0033	1.529	2.78267	4.02		25.1365	43.4203	63.3223	1.508	2.60533	3.79933		23.3907	44.424	65.91	1.371	1.496	3.9545		24.2897	44.9745	62.9045	1.45733	2.6985	3.774		24.5003	45.9013	68.1125	1.47	2.75433	4.0865
726	740	2	15.63	EALSHLQSPLDPSTL		2.4605	9.8645	22.9127	0.271	1.085	2.52		2.584	10.622	23.3483	0.284	1.16833	2.56833		2.5545	9.427	23.2133	0.281	1.037	2.55333		2.44467	9.72567	23.2887	0.319	0.252	2.56167		2.338	8.3705	22.6257	0.257333	0.921	2.48867		2.35533	8.81733	23.2533	0.259	0.970333	2.558
726	741	2	18.61	EALSHLQSPLDPSTLL		2.3745	8.891	21.0037	0.285	1.067	2.52		2.01167	9.51	21.586	0.241	1.141	2.59067		2.0005	9.44833	20.7767	0.24	1.134	2.49333		2.51833	9.56	22.0233	0.268	0.24	2.643		1.93	7.2045	20.5977	0.231667	0.865	2.47167		1.983	8.09133	20.892	0.238	0.971333	2.507
728	740	2	14.61	LSHLQSPLDPSTL		2.8765	12.1325	28.2557	0.259	1.092	2.543		3.16033	13.5063	29.1913	0.284667	1.21567	2.627		2.0855	10.3483	27.2133	0.188	0.931333	2.449		2.50367	11.3327	28.0487	0.271	0.185	2.52433		2.72533	10.4695	27.81	0.245333	0.9425	2.50267		2.83067	11.1227	28.324	0.255	1.001	2.54933
728	741	2	18.16	LSHLQSPLDPSTLL		2.365	10.6775	25.508	0.2365	1.0675	2.55067		2.54467	11.5233	27.0557	0.254333	1.15233	2.70567		2.5035	10.3833	25.3197	0.25	1.03833	2.532		2.64	10.7953	25.6747	0.295	0.233	2.56733		2.28167	9.779	24.9647	0.228	0.978	2.49667		2.38767	9.319	25.516	0.239	0.932	2.55167
741	747	1	9.97	LAEVCVE		21.2325	35.1025	38.3303	1.062	1.755	1.91667		22.289	34.7773	39.4137	1.11433	1.739	1.97067		21.819	33.9415	37.898	1.091	1.6975	1.895		22.9207	33.8293	39.343	1.155	1.12	1.967		22.1673	35.267	38.2263	1.10833	1.7635	1.91133		22.925	34.6293	40.047	1.146	1.73167	2.00233
744	751	1	15.13	VCVEQCTF		19.027	36.7055	48.978	1.142	2.2025	2.93867		19.9433	36.723	51.5257	1.19667	2.20333	3.09167		17.586	41.5267	49.3863	1.055	2.49133	2.963		21.3527	42.5903	47.9823	1.412	1.164	2.87867		20.7383	39.1615	49.5993	1.24433	2.35	2.976		20.6477	41.3743	51.4717	1.239	2.48233	3.08833
752	760	2	15.04	MDSKMKPLW		15.8115	17.7335	19.3953	0.9485	1.064	1.164		18.254	17.3857	19.8973	1.095	1.043	1.19367		17.1255	15.6363	19.28	1.028	0.938333	1.1565		16.2755	14.0695	20.7467	0.875	1.078	1.245		16.995	17.132	20.1123	1.01967	1.0275	1.20667		16.575	16.835	22.8883	0.994667	1.01033	1.37333
752	762	2	19.31	MDSKMKPLWIM		10.198	10.0715	11.86	0.816	0.806	0.948667		10.398	10.2783	11.9717	0.832	0.822333	0.958		10.3025	10.65	13.147	0.824	0.852	1.05167		10.165	10.3093	13.9803	0.808	0.8	1.11833		9.75333	10.6935	12.0207	0.780333	0.8555	0.961667		10.1433	10.2607	13.1735	0.811333	0.820667	1.054
753	760	2	14.85	DSKMKPLW		16.525	17.104	20.314	0.8265	0.855	1.016		15.3913	17.564	21.0043	0.769667	0.878333	1.05033		19.714	17.695	24.3287	0.986	0.884667	1.21633		15.5597	16.872	22.514	1.097	0.864	1.12567		17.099	17.057	22.072	0.855	0.853	1.104		16.6537	17.2093	25.105	0.832333	0.860667	1.255
753	762	3	19.37	DSKMKPLWIM		9.95	9.7145	12.706	0.6965	0.68	0.889333		9.722	10.9967	12.754	0.680667	0.769333	0.892667		10.4965	11.646	13.133	0.7345	0.815333	0.919333		9.82	10.281	15.255	0.735	0.732	1.068		10.2895	10.7415	12.564	0.7205	0.752	0.879667		9.918	10.534	13.3783	0.694333	0.737	0.936333
761	766	1	6.46	IMYSNE		32.91	39.2295	52.6287	1.3165	1.569	2.10533		33.353	39.7477	54.049	1.334	1.58967	2.162		33.6185	39.768	53.2627	1.345	1.59067	2.13033		33.8473	39.2273	53.5957	1.421	1.334	2.14367		35.4057	37.6385	51.0557	1.41633	1.5055	2.04233		34.511	38.614	55.969	1.38067	1.54433	2.239
763	788	3	16.81	YSNEEAGSGGSVGIIFKNGDDLRQDM		16.7405	25.005	30.703	4.0175	6.001	7.36867		18.1035	25.0497	31.867	4.345	6.012	7.64833		16.734	24.0403	31.192	4.016	5.76967	7.486		16.1613	23.9833	33.0503	4.115	3.894	7.932		17.6717	25.1705	32.435	4.241	6.041	7.78467		17.1577	24.8297	32.1153	4.118	5.959	7.70767
767	784	2	16.49	EAGSGGSVGIIFKNGDDL		12.138	16.899	20.3383	1.942	2.704	3.254		12.7087	16.0027	20.3423	2.03367	2.56033	3.25467		11.8415	16.406	18.868	1.8945	2.625	3.019		12.23	15.341	21.5107	2.157	1.757	3.442		13.093	17.626	21.6417	2.0945	2.8205	3.46267		12.0875	15.662	21.6857	1.934	2.50567	3.46933
767	788	2	16.38	EAGSGGSVGIIFKNGDDLRQDM		10.434	21.732	29.3363	2.0865	4.3465	5.86733		11.458	21.019	29.671	2.29167	4.204	5.9345		8.943	20.2667	30.4547	1.789	4.05333	6.091		10.3267	19.9643	31.2103	2.171	1.97	6.242		10.255	20.3895	30.8567	2.051	4.078	6.17133		11.037	20.9493	31.7225	2.20733	4.19	6.3445
767	790	3	17.66	EAGSGGSVGIIFKNGDDLRQDMLT		10.3635	17.7855	25.7203	2.28	3.913	5.65867		9.21233	18.2393	24.0307	2.02667	4.01267	5.287		8.5865	17.0373	24.732	1.889	3.74833	5.44067		7.894	15.7153	26.2843	1.9	1.677	5.78267		11.2443	17.6565	26.4777	2.47367	3.8845	5.82533		8.77067	17.0187	25.9933	1.92967	3.744	5.71867
797	807	2	16.19	MDVLWKQEGLD		1.0455	3.833	9.93	0.094	0.345	0.894		1.362	3.941	9.7055	0.1225	0.355	0.8735		1.0975	3.327	9.6025	0.099	0.2995	0.864		1.09433	3.537	9.933	0.125	0.103	0.894		1.0485	4.092	9.835	0.094	0.368	0.8855		1.18633	3.9145	10.442	0.106667	0.3525	0.94
797	808	2	19.55	MDVLWKQEGLDL		0.632	2.442	7.35133	0.0635	0.244	0.735		0.7325	2.79633	7.61567	0.0735	0.279333	0.761333		0.679	2.33667	7.10767	0.068	0.234	0.710667		0.842667	2.65167	7.507	0.112	0.079	0.751		0.718333	2.5505	7.29633	0.072	0.255	0.729667		0.878	2.87567	7.529	0.0876667	0.287667	0.753
798	808	2	18.63	DVLWKQEGLDL		-0.0615	2.555	8.88267	-0.0055	0.23	0.799333		0.3995	3.56733	9.46233	0.036	0.321333	0.852		0.648	2.715	8.661	0.058	0.244333	0.7795		1.63667	2.97733	9.8155	0.077	0.04	0.8835		0.828	2.508	8.882	0.0743333	0.226	0.799333		0.799333	2.837	9.45133	0.072	0.255333	0.850333
799	808	2	17.63	VLWKQEGLDL		1.188	3.7135	10.3403	0.095	0.297	0.827		1.0965	3.985	10.4997	0.0875	0.318667	0.84		1.263	3.722	10.411	0.101	0.298	0.833		2.07167	3.471	10.7147	0.122	0.08	0.857		1.51033	3.6655	10.2953	0.121	0.293	0.823667		1.51633	3.70767	11.2965	0.121667	0.296333	0.904
801	807	2	8.15	WKQEGLD		1.427	7.228	23.461	0.071	0.3615	1.173		1.62267	7.71933	24.1893	0.0813333	0.386	1.20967		0.9905	7.247	24.3947	0.0495	0.362333	1.21967		1.678	7.382	23.9933	0.118	0.075	1.19967		1.607	6.5055	23.6543	0.0803333	0.3255	1.18267		1.59633	7.982	24.5565	0.08	0.399	1.2275
801	808	2	14.9	WKQEGLDL		0.777	4.4605	13.987	0.047	0.2675	0.839333		3.034	4.74167	14.4677	0.182	0.284333	0.868333		-0.994	2.88267	12.575	-0.0595	0.173	0.7545		-1.35133	2.84667	12.6117	-0.037	-0.113	0.757		0.39	4.226	13.893	0.0233333	0.2535	0.8335		1.09333	4.86333	14.711	0.0653333	0.291667	0.8825
808	824	3	15.28	LRMTPYGCLPTGDRTGL		3.752	4.5045	7.211	0.488	0.5855	0.937667		3.804	4.427	7.699	0.494333	0.5755	1.00067		3.0725	3.873	5.91567	0.3995	0.503667	0.769		3.396	3.80867	7.35933	0.566	0.443	0.956667		3.99933	4.7335	7.872	0.52	0.6155	1.02333		3.76867	4.44767	8.9155	0.49	0.578	1.159
808	826	3	16	LRMTPYGCLPTGDRTGLIE		3.034	3.808	6.22567	0.455	0.5715	0.933667		3.10033	3.51333	6.34467	0.465	0.527333	0.952		3.163	4.09933	5.94	0.4745	0.615	0.890667		2.94667	3.44133	6.235	0.559	0.444	0.935333		3.51867	4.6125	6.807	0.527667	0.692	1.021		3.155	3.5255	7.542	0.473333	0.529	1.1315
809	824	3	13.91	RMTPYGCLPTGDRTGL		3.87	4.977	7.67033	0.4645	0.597	0.920667		4.604	5.02867	8.004	0.552667	0.603333	0.960333		4.671	4.64767	7.184	0.561	0.557667	0.862		3.92533	4.869	7.43467	0.605	0.483	0.892		4.62	5.15	8.16333	0.5545	0.618	0.979667		4.19667	5.16033	6.481	0.503333	0.619333	0.778
809	826	3	14.7	RMTPYGCLPTGDRTGLIE		3.4965	4.4115	7.00167	0.4895	0.6175	0.980333		3.74867	4.48267	7.25567	0.525	0.627667	1.016		3.7785	3.933	5.93	0.529	0.550667	0.83		3.6195	3.75133	6.41967	0.584	0.43	0.899		3.809	4.7205	7.217	0.533333	0.661	1.01033		3.75167	4.591	7.7615	0.525	0.642667	1.0865
811	826	2	14.73	TPYGCLPTGDRTGLIE		5.3025	7.408	8.70467	0.689	0.963	1.13167		5.381	6.748	8.88133	0.6995	0.877	1.15467		3.7545	5.56733	7.0425	0.488	0.723667	0.9155		3.57567	4.414	7.798	0.566	0.316	1.014		5.516	4.75	9.144	0.716667	0.617	1.1885		5.25967	5.936	8.17667	0.683667	0.771667	1.063
827	835	1	8.22	VVLRSDTIA		15.813	27.9905	34.0577	1.107	1.9595	2.384		16.44	28.3837	34.5977	1.151	1.987	2.422		13.7725	18.5467	29.2687	0.964	1.29833	2.049		13.3937	18.5217	29.6783	0.984	0.935	2.07733		14.122	21.859	29.714	0.988667	1.53	2.08		14.043	23.052	29.8395	0.983	1.61367	2.0885
827	835	2	8.22	VVLRSDTIA		16.264	27.51	32.9733	1.138	1.9255	2.308		17.283	28.0253	34.312	1.20967	1.96167	2.40167		13.367	18.3363	29.5273	0.936	1.28367	2.067		13.4233	18.608	29.9717	0.985	0.896	2.098		13.9967	22.905	29.0223	0.979667	1.603	2.03167		13.9703	22.9687	29.281	0.977667	1.60767	2.04967
827	836	1	6.94	VVLRSDTIAN		15.3475	25.7705	32.5103	1.228	2.0615	2.60067		15.5577	26.082	33.4663	1.24433	2.08667	2.67733		12.3315	17.1893	27.428	0.9865	1.375	2.19433		12.2327	17.302	27.9543	1.042	0.953	2.23633		13.1427	20.2615	27.0857	1.05133	1.621	2.167		13.0277	20.173	27.5463	1.042	1.61367	2.20367
827	836	2	6.94	VVLRSDTIAN		14.7935	25.56	32.485	1.1835	2.045	2.59867		15.0563	26.0153	32.8227	1.20433	2.08133	2.626		12.204	16.7533	27.2093	0.976	1.34033	2.17667		12.0753	17.156	27.59	1.008	0.957	2.207		12.711	20.0615	26.9597	1.01667	1.605	2.157		12.656	20.9387	27.222	1.01267	1.67533	2.17767
827	839	2	16.8	VVLRSDTIANIQL		10.3235	19.867	31.4703	1.136	2.1855	3.462		10.5827	21.164	32.8217	1.164	2.328	3.61067		8.281	13.8377	27.6717	0.911	1.522	3.04367		8.18367	14.3123	28.5463	0.956	0.894	3.14033		8.511	15.651	27.641	0.936	1.7215	3.04033		8.64233	16.8093	28.5803	0.950667	1.849	3.14367
828	839	2	16.35	VLRSDTIANIQL		1.173	6.4495	21.4157	0.1175	0.645	2.14133		2.74633	8.70967	22.546	0.274667	0.871	2.25467		1.2075	4.76467	16.0047	0.121	0.476333	1.60067		2.792	8.46767	16.983	0.158	0.235	1.69833		1.69167	4.8475	14.8737	0.169333	0.4845	1.48733		1.05567	6.56867	15.11	0.105667	0.657	1.511
830	839	2	15.21	RSDTIANIQL		1.577	7.123	20.598	0.126	0.57	1.648		1.932	8.43633	21.5827	0.154667	0.675	1.72667		0.47	4.05433	15.9063	0.0375	0.324333	1.27267		0.708	5.16033	16.431	0.075	0.061	1.31433		1.38767	4.715	16.726	0.111	0.377	1.338		1.37133	5.67133	17.5247	0.109667	0.453667	1.402
834	839	1	14.45	IANIQL		2.055	11.6505	37.1487	0.082	0.466	1.486		1.20467	14.0723	40.1723	0.0483333	0.563	1.607		1.539	6.714	31.1437	0.062	0.268667	1.24567		1.5065	5.54767	31.418	0.029	0.091	1.25667		1.16833	7.4405	30.2643	0.0466667	0.2975	1.21067		1.077	8.46333	31.825	0.0433333	0.338667	1.273
845	855	2	10.88	AATAAFNKDAL		64.84	79.9955	79.9667	5.8355	7.1995	7.197		68.1477	79.443	77.6763	6.13333	7.15	6.991		66.262	77.3393	77.789	5.9635	6.96067	7.001		67.3237	78.2553	78.4043	6.158	5.988	7.05633		64.4257	80.3215	78.488	5.79833	7.229	7.064		66.5887	78.0763	78.2723	5.993	7.02667	7.04467
845	856	2	14.33	AATAAFNKDALL		54.1905	67.7295	66.7573	5.419	6.773	6.67567		56.6703	66.725	67.7037	5.667	6.67233	6.77		55.249	67.557	68.0947	5.5245	6.75567	6.80967		56.5367	64.289	68.8603	5.808	5.892	6.88633		53.003	65.6585	66.887	5.30033	6.566	6.68867		54.7817	64.692	68.9567	5.47833	6.46933	6.89533
845	868	4	19.18	AATAAFNKDALLNWLKSKNPGEAL		30.3525	46.0965	52.139	6.374	9.68	10.949		33.756	46.0313	53.8967	7.089	9.66667	11.3187		33.022	45.563	53.0513	6.9345	9.568	11.1407		33.8167	45.6807	53.8435	7.192	7.052	11.3075		30.439	45.1845	51.7985	6.392	9.4885	10.8775		32.256	45.2943	54.032	6.774	9.512	11.347
850	856	2	12.91	FNKDALL		29.2185	54.245	53.5773	1.461	2.712	2.67867		36.3393	53.4737	55.8683	1.817	2.674	2.79333		33.6185	53.078	52.881	1.681	2.654	2.644		38.63	51.3977	55.2097	1.975	1.874	2.76067		29.95	51.8885	52.7017	1.49733	2.594	2.635		34.419	52.41	55.7813	1.721	2.62067	2.789
850	868	3	18.94	FNKDALLNWLKSKNPGEAL		22.9935	42.2125	50.1793	3.679	6.754	8.02867		26.2767	42.5377	52.7043	4.204	6.806	8.43267		24.686	41.9157	49.9373	3.9495	6.70633	7.99		27.2037	41.882	52.3603	4.46	4.177	8.37767		22.4873	39.992	49.3793	3.598	6.3985	7.90067		25.1267	41.2523	52.1835	4.02033	6.60033	8.3495
850	874	4	19.72	FNKDALLNWLKSKNPGEALDRAIEE		17.3775	36.251	42.1157	3.823	7.975	9.26533		20.4645	36.1023	43.8873	4.502	7.94233	9.655		19.0515	35.8593	41.53	4.191	7.88933	9.13633		21.1577	37.7615	43.9457	4.423	4.422	9.668		17.1207	33.999	42.8123	3.76667	7.48	9.41867		18.794	35.4707	44.167	4.135	7.80333	9.717
851	856	1	9.27	NKDALL		18.363	45.8665	49.1377	0.7345	1.8345	1.96567		26.4977	45.551	51.1407	1.05967	1.822	2.046		21.271	46.097	49.204	0.8505	1.844	1.968		28.2167	46.1583	50.8273	1.191	1.081	2.03333		16.418	43.6735	48.0497	0.656667	1.747	1.922		23.5703	41.1403	51.401	0.943	1.64567	2.056
851	868	3	17.73	NKDALLNWLKSKNPGEAL		19.6475	37.4875	45.958	2.947	5.6235	6.89367		21.911	38.1537	48.8283	3.28667	5.72267	7.32433		20.8515	37.1757	45.7567	3.1275	5.57633	6.86367		22.979	37.916	48.2647	3.517	3.377	7.23967		19.1457	35.8265	44.994	2.872	5.374	6.749		20.619	36.924	47.4843	3.093	5.53867	7.123
851	874	4	18.6	NKDALLNWLKSKNPGEALDRAIEE		15.3005	33.469	40.4363	3.213	7.0285	8.49167		16.3797	32.1303	41.9837	3.43967	6.74733	8.81667		16.051	30.165	39.989	3.371	6.33467	8.398		12.8583	32.124	41.2263	1.545	2.813	8.65767		15.1447	32.695	39.1723	3.18	6.8655	8.226		16.0397	30.781	41.991	3.368	6.464	8.818
856	868	3	14.14	LNWLKSKNPGEAL		22.195	37.322	40.7847	2.2195	3.732	4.078		23.778	36.753	40.55	2.37767	3.67533	4.055		24.0925	36.9403	41.1303	2.409	3.69367	4.11333		24.1553	36.6127	41.895	2.513	2.39	4.18933		21.8127	35.4915	39.9717	2.18133	3.549	3.997		22.856	36.3437	41.1663	2.28567	3.63433	4.11633
856	874	3	15.5	LNWLKSKNPGEALDRAIEE		15.661	30.9155	32.9687	2.5055	4.9465	5.275		17.4603	30.381	32.3133	2.79367	4.861	5.17033		17.0115	29.256	32.7117	2.722	4.681	5.23367		16.7947	29.068	32.356	2.759	2.728	5.177		15.8103	30.564	31.1543	2.52967	4.8905	4.98467		16.254	29.5303	32.5143	2.60067	4.725	5.20233
857	868	2	12.34	NWLKSKNPGEAL		25.404	41.41	44.4687	2.2865	3.7265	4.002		27.0575	41.301	45.0733	2.435	3.717	4.05667		25.8005	40.8767	44.919	2.322	3.679	4.043		28.1423	41.0167	44.7655	2.551	2.498	4.029		25.415	39.786	44.6695	2.28733	3.581	4.0205		25.8383	40.265	45.977	2.32533	3.624	4.138
857	871	3	10.8	NWLKSKNPGEALDRA		21.36	41.265	45.0617	2.563	4.952	5.40733		22.867	40.4717	44.6767	2.744	4.85667	5.361		24.0155	39.62	45.018	2.882	4.75467	5.40233		24.7517	41.299	46.4313	3.037	2.929	5.572		21.3633	39.2045	44.084	2.56333	4.7045	5.29		22.487	40.3193	44.8947	2.69833	4.838	5.38733
857	874	3	14.28	NWLKSKNPGEALDRAIEE		16.2205	35.2625	35.896	2.433	5.2895	5.38433		19.6973	31.2853	36.6377	2.95467	4.69267	5.49533		15.0635	29.9037	36.018	2.26	4.48533	5.403		17.9903	31.44	35.7233	2.891	2.555	5.35867		14.738	31.766	35.1075	2.211	4.765	5.266		16.9127	28.2983	38.303	2.53667	4.24467	5.74567
869	874	1	2.61	DRAIEE		0.169	0.0825	0.816667	0.0065	0.0035	0.0326667		-0.187333	0.886667	1.08333	-0.00766667	0.0353333	0.0433333		-0.2375	0.675667	0.759667	-0.0095	0.027	0.0306667		-0.091	0.653667	0.016	-0.001	-0.006	0.000666667		0.225667	-0.1945	0.254667	0.00933333	-0.0075	0.01		0.019	0.262	0.508333	0.000666667	0.0103333	0.0203333
869	875	2	11.84	DRAIEEF		-0.1565	-0.007	0.482667	-0.008	-0.0005	0.024		0.257	0.171	0.1145	0.013	0.009	0.006		0.348	0.231	0.234	0.0175	0.0116667	0.0116667		-0.205667	0.00966667	0.0126667	-0.001	-0.029	0.000666667		-0.0853333	0.5335	-0.163667	-0.004	0.0265	-0.008		0.287667	-0.369	-0.238	0.0146667	-0.0183333	-0.0116667
875	881	1	13.22	FTLSCAG		0.417	0.2555	0.355333	0.021	0.0125	0.018		0.279333	0.278333	0.331	0.014	0.014	0.0163333		0.392	0.548333	0.395333	0.0195	0.0273333	0.0196667		0.291	0.430667	0.337333	0.034	0.01	0.017		0.311	0.407	0.390667	0.0156667	0.0205	0.0193333		0.283667	0.32	0.449	0.0143333	0.016	0.0225
875	882	1	17.1	FTLSCAGY		-0.3955	-0.391	-0.585	-0.0235	-0.0235	-0.035		-0.0893333	-0.586	0.219333	-0.00533333	-0.0353333	0.013		-0.449	0.00866667	0.136667	-0.027	0.000666667	0.00833333		-0.747	-0.338667	-0.372	-0.035	-0.054	-0.0223333		-0.172667	-0.324	-0.580333	-0.0103333	-0.0195	-0.035		-0.155	-0.368667	-0.175	-0.00933333	-0.022	-0.0105
876	881	1	4.44	TLSCAG		2.8365	3.4855	2.26967	0.1135	0.139	0.0906667		2.47733	3.852	3.36333	0.099	0.154	0.134333		4.17	2.09133	1.522	0.1665	0.0836667	0.061		1.039	1.55333	2.55567	0.092	0.101	0.102		2.642	0.942	1.70533	0.105667	0.038	0.0683333		3.366	1.85833	2.38467	0.135	0.0743333	0.0953333
886	898	2	10.73	TYVLGIGDRHSDN		3.631	8.0305	12.212	0.3995	0.8835	1.343		4.107	9.903	12.013	0.452	1.08933	1.32133		4.2505	7.59033	12.9227	0.4675	0.835	1.42167		3.63433	7.49967	14.1387	0.419	0.414	1.55533		4.532	8.2975	12.4707	0.498333	0.9125	1.37167		3.91633	9.80233	12.4047	0.430667	1.07833	1.36433
887	898	3	9.91	YVLGIGDRHSDN		2.9935	8.4675	12.1067	0.2995	0.847	1.211		3.53367	9.73067	12.795	0.353333	0.973	1.27933		3.859	7.99833	11.6243	0.386	0.8	1.16233		3.32433	7.955	12.554	0.401	0.319	1.2555		3.68967	8.336	12.5877	0.368667	0.834	1.259		3.72833	9.65367	13.5715	0.373	0.965333	1.357
887	900	3	14.35	YVLGIGDRHSDNIM		1.3135	4.3505	6.81833	0.1575	0.522	0.818333		1.72267	5.15833	7.11467	0.207	0.618667	0.853667		1.391	3.61167	7.49867	0.167	0.433333	0.9		1.82	4.7805	6.86567	0.261	0.176	0.824		1.311	4.38	6.82167	0.157333	0.5255	0.818333		1.48433	5.16467	7.521	0.178	0.62	0.9025
901	907	2	5.43	IRESGQL		1.7515	7.662	19.0543	0.0875	0.3835	0.952667		2.59867	8.45267	20.8563	0.13	0.422333	1.043		2.505	7.54667	20.187	0.1255	0.377333	1.00933		2.20133	8.007	21.7907	0.175	0.088	1.08967		2.26367	6.8835	16.1577	0.113	0.344	0.807667		2.4	8.29833	16.9913	0.12	0.414667	0.849667
901	912	3	19.1	IRESGQLFHIDF		0.944	1.5785	3.49633	0.0945	0.158	0.349667		0.9145	1.727	4.081	0.0915	0.173	0.408		0.924	1.618	2.155	0.092	0.161667	0.2155		0.565333	1.597	2.83633	0.124	0.078	0.283333		0.920333	1.4605	1.95867	0.092	0.146	0.195667		0.988667	1.301	3.084	0.099	0.130333	0.308
901	915	3	19.25	IRESGQLFHIDFGHF		2.8575	8.1905	9.89467	0.3715	1.0645	1.28633		3.4175	8.45733	10.846	0.4445	1.09933	1.41		2.3235	7.519	9.589	0.302	0.977667	1.2465		2.68333	7.28267	9.69133	0.351	0.291	1.25967		2.40433	7.888	9.0935	0.312667	1.025	1.182		2.58433	7.89867	9.8785	0.336	1.027	1.284
901	919	4	20.78	IRESGQLFHIDFGHFLGNF		8.885	20.1265	24.661	1.5105	3.421	4.19233		9.733	20.833	24.7973	1.65467	3.54133	4.21567		9.6105	19.3193	24.504	1.6335	3.28433	4.16567		9.94467	19.0117	24.4893	1.752	1.623	4.16333		8.852	18.7285	23.7607	1.505	3.184	4.03933		8.85833	19.78	24.28	1.50567	3.36233	4.12733
908	915	1	18.5	FHIDFGHF		5.4155	17.3175	20.617	0.325	1.039	1.23733		5.37967	18.171	23.1877	0.322667	1.09033	1.391		2.1875	16.5337	19.8887	0.1315	0.992	1.193		4.7	14.9573	18.5747	0.332	0.261	1.11467		3.93833	18.1275	17.2097	0.236667	1.088	1.03233		4.95867	17.0917	20.157	0.297667	1.02533	1.2095
908	919	3	20.9	FHIDFGHFLGNF		13.4865	32.4225	39.6847	1.3485	3.242	3.96833		15.1875	33.724	40.1407	1.519	3.37233	4.01433		14.15	31.038	39.3833	1.415	3.10367	3.938		14.9533	31.2827	39.947	1.595	1.413	3.99467		13.0763	30.5735	38.7293	1.30767	3.0575	3.87267		13.3867	30.772	38.529	1.33867	3.077	3.853
909	915	2	14.46	HIDFGHF		5.64	23.4685	27.7373	0.282	1.1735	1.387		7.03333	23.6693	28.774	0.351333	1.18333	1.43867		4.6	20.7953	29.043	0.23	1.04	1.45233		3.89433	19.461	28.1537	0.298	0.106	1.40767		4.67233	21.947	25.4217	0.233667	1.0975	1.271		5.01733	22.1907	25.3123	0.251	1.10967	1.26533
909	919	2	20.35	HIDFGHFLGNF		15.1345	37.5745	44.971	1.362	3.382	4.04767		18.7963	38.467	45.35	1.692	3.462	4.08133		15.9225	35.237	43.977	1.4335	3.17167	3.95767		18.0417	37.404	45.7713	1.668	1.469	4.11933		17.2233	36.816	43.5787	1.55	3.3135	3.922		18.874	37.484	44.5527	1.69867	3.37333	4.00967
916	934	4	16.87	LGNFKTKFGINRERVPFIL		19.0115	25.2495	29.474	3.0415	4.04	4.716		21.0433	25.3367	32.4767	3.36667	4.054	5.19633		20.9845	25.108	29.058	3.3575	4.01733	4.64967		19.618	24.3123	31.3353	3.35	2.928	5.01367		21.409	25.424	29.6293	3.4255	4.0675	4.74033		20.2443	25.267	34.2173	3.239	4.04267	5.47467
927	934	2	16.95	RERVPFIL		8.803	23.066	36.1753	0.4405	1.1535	1.80867		9.38133	25.723	46.6273	0.469333	1.286	2.33133		8.992	21.2633	35.073	0.4495	1.063	1.75367		8.507	24.027	44.2223	0.5	0.397	2.211		10.8995	23.7075	37.4897	0.545	1.1855	1.87433		10.1727	28.1823	50.6753	0.508667	1.40933	2.53367
936	953	3	13.94	YDFVHVIQQGKTNNSEKF		24.56	31.764	32.32	3.9295	5.082	5.17133		26.933	30.3095	32.638	4.3095	4.8495	5.222		25.298	29.437	32.7993	4.048	4.71	5.24767		25.7643	28.241	32.5845	4.324	4.425	5.2135		26.1997	30.594	33.217	4.192	4.895	5.31467		24.6247	29.1547	37.172	3.93967	4.665	5.9475
936	958	3	12.98	YDFVHVIQQGKTNNSEKFERFRG		13.174	18.856	24.7907	2.767	3.9595	5.20633		14.6357	21.084	27.2167	3.07367	4.42733	5.71567		13.6545	18.8513	24.174	2.8675	3.95867	5.07667		14.16	20.239	27.209	3.12	2.946	5.71367		13.6667	18.779	24.688	2.87	3.9435	5.18467		13.8623	20.5773	27.3653	2.91133	4.321	5.74667
938	956	4	10.35	FVHVIQQGKTNNSEKFERF		10.9855	16.7865	23.0253	1.8675	2.8535	3.91433		12.6487	20.4583	25.251	2.15	3.478	4.293		11.9585	17.4503	23.6043	2.033	2.96667	4.01267		11.9277	19.265	25.275	2.311	1.98	4.297		11.6777	18.1815	22.6273	1.98533	3.091	3.84667		13.0617	20.2203	26.0635	2.22033	3.43733	4.4305
938	958	4	8.53	FVHVIQQGKTNNSEKFERFRG		8.7095	14.094	19.0293	1.6545	2.678	3.61567		10.3877	16.8677	20.9703	1.97367	3.205	3.98467		9.851	14.4637	19.1337	1.872	2.74833	3.63567		10.166	15.9623	21.3617	2.152	1.885	4.05833		9.685	14.845	18.8733	1.84	2.8205	3.586		10.1317	16.6127	21.4793	1.925	3.15633	4.081
939	958	3	6.86	VHVIQQGKTNNSEKFERFRG		10.4415	16.4335	21.9153	1.8795	2.9575	3.945		12.47	19.868	25.3113	2.24467	3.57633	4.556		11.5595	16.97	22.5443	2.0805	3.05467	4.058		11.8587	18.5157	25.061	2.441	2.097	4.51067		11.269	17.1505	22.0137	2.02833	3.087	3.96233		11.802	19.0823	24.778	2.12433	3.435	4.46
940	958	4	6.09	HVIQQGKTNNSEKFERFRG		18.4395	16.9945	24.618	3.1345	2.889	4.185		14.268	22.1237	27.3147	2.42567	3.761	4.64333		14.938	19.0317	25.4003	2.5395	3.23533	4.31833		13.624	21.189	27.051	2.396	2.249	4.59867		13.9813	18.93	24.1137	2.37667	3.218	4.09933		14.4683	20.8153	28.608	2.45967	3.539	4.86333
957	963	2	2.45	RGYCERA		2.472	2.031	1.329	0.1235	0.1015	0.0666667		1.35667	1.96467	2.359	0.068	0.0986667	0.118		3.182	3.444	2.26567	0.159	0.172333	0.113333		2.7425	1.068	2.073	0.048	0.226	0.103667		2.229	2.7285	1.97067	0.111333	0.1365	0.0983333		1.6255	0.831667	1.875	0.081	0.0416667	0.0935
962	967	1	13.16	RAYTIL		0.811	0.4215	0.234	0.0325	0.017	0.00933333		0.503	0.0386667	-0.626	0.02	0.00166667	-0.025		0.7275	0.16	-0.154	0.029	0.00633333	-0.00633333		0.908	0.658	-0.652667	0.085	0.049	-0.0263333		0.184333	1.0875	-0.715667	0.00766667	0.0435	-0.0286667		-0.289333	0.757333	-0.279333	-0.0113333	0.0303333	-0.011
964	974	2	15.8	YTILRRHGLLF		4.1225	7.772	11.864	0.371	0.6995	1.06767		4.31267	8.02267	12.1283	0.388	0.722	1.09167		4.427	7.84267	11.361	0.3985	0.705667	1.02233		4.31133	7.58333	11.6543	0.401	0.366	1.049		4.14433	7.706	12.135	0.373333	0.6935	1.09233		4.055	7.80033	12.991	0.365	0.702333	1.1695
966	973	2	7.22	ILRRHGLL		5.463	11.2	17.4467	0.328	0.672	1.04667		6.149	12.958	17.455	0.369333	0.777333	1.047		6.234	10.7197	17.3177	0.374	0.643333	1.03933		6.01733	10.5035	16.5463	0.406	0.342	0.992667		5.21633	11.655	17.514	0.313333	0.699	1.05067		4.93733	12.7467	18.002	0.296333	0.765	1.08
966	974	2	13.57	ILRRHGLLF		5.2205	9.3575	12.6813	0.3655	0.6555	0.887667		4.45467	9.00333	12.873	0.311667	0.63	0.901		5.419	7.64533	11.9727	0.379	0.535333	0.838333		3.71467	7.515	14.7297	0.308	0.337	1.03133		5.197	8.361	13.321	0.364	0.5855	0.9325		4.05267	8.891	15.518	0.283667	0.622	1.086
978	986	2	17.04	FALMRAAGL		9.319	33.09	58.9307	0.6525	2.3165	4.12533		11.607	34.5507	59.6577	0.812333	2.41833	4.17567		8.7205	31.5103	57.6047	0.6105	2.20567	4.03267		10.373	31.6797	60.0487	0.772	0.588	4.203		7.32467	31.9235	53.8607	0.512667	2.2345	3.77033		8.099	31.236	57.904	0.567	2.18633	4.053
978	989	2	19.8	FALMRAAGLPEL		8.166	33.2015	58.4977	0.735	2.9885	5.26467		8.728	34.3343	59.262	0.785333	3.09	5.33367		8.8565	32.2577	58.848	0.797	2.903	5.29633		9.71567	33.2097	58.916	1.007	0.753	5.30233		7.06433	29.661	57.0767	0.636	2.6695	5.137		7.16067	33.6723	59.176	0.644333	3.03033	5.326
982	989	2	13.32	RAAGLPEL		8.6055	40.6535	75.1515	0.4305	2.033	3.7575		10.907	43.9597	77.3907	0.545	2.19767	3.86967		10.9545	40.037	75.4483	0.5475	2.002	3.77233		10.9973	41.7553	76.3737	0.655	0.51	3.81867		7.433	35.5415	70.7477	0.371667	1.777	3.53733		8.63467	37.6567	75.765	0.431667	1.883	3.7885
982	991	2	13.04	RAAGLPELSC		23.0505	54.3515	77.679	1.614	3.805	5.43733		27.6033	55.7913	78.852	1.93233	3.90567	5.51967		26.0355	52.098	78.6063	1.8225	3.647	5.50233		24.4417	53.6567	77.9537	1.827	1.652	5.457		20.772	48.437	74.9403	1.454	3.3905	5.246		21.1587	50.2557	77.5237	1.481	3.518	5.42633
987	997	2	12.18	PELSCSKDIQY		24.7405	51.7285	59.171	2.2265	4.6555	5.32533		28.2077	53.6883	57.697	2.53867	4.832	5.19267		25.9565	50.7247	56.225	2.336	4.565	5.06033		26.261	50.214	58.0677	2.394	2.278	5.226		25.5193	49.5135	57.3633	2.29667	4.4565	5.16267		26.641	50.4033	60.2107	2.39767	4.536	5.41867
987	1000	3	12.53	PELSCSKDIQYLKD		15.3505	35.22	44.4997	1.842	4.226	5.34		15.373	35.349	44.8257	1.84467	4.242	5.379		16.1695	34.8127	43.8067	1.9405	4.17733	5.25667		15.3533	33.4727	47.0553	2.052	1.867	5.64667		14.7003	33.466	44.251	1.764	4.016	5.31033		15.5813	33.9017	46.94	1.87	4.06833	5.6325
990	997	2	7.04	SCSKDIQY		27.738	63.59	66.9243	1.664	3.815	4.01533		29.6487	61.201	65.2617	1.779	3.672	3.91567		26.708	60.117	64.7437	1.6025	3.607	3.88433		27.2687	59.794	66.3823	1.659	1.682	3.983		25.3535	61.3355	65.211	1.521	3.68	3.91267		27.6653	61.6817	69.5047	1.66	3.70067	4.17033
990	1000	3	8.41	SCSKDIQYLKD		14.3585	41.162	51.7203	1.2925	3.7045	4.655		16.0347	39.0547	50.337	1.443	3.51467	4.53033		15.0825	37.124	50.0267	1.3575	3.34133	4.50233		15.5643	37.654	51.1523	1.516	1.38	4.60367		15.8827	37.782	50.169	1.42933	3.4	4.515		15.5663	41.035	51.6493	1.40067	3.693	4.64867
990	1002	3	15.43	SCSKDIQYLKDSL		11.386	31.0215	38.1203	1.2525	3.4125	4.193		15.162	32.375	38.471	1.668	3.56133	4.23167		10.1295	30.9143	43.4547	1.114	3.40067	4.78		12.5357	31.27	39.2183	1.635	1.107	4.314		10.2193	32.197	40.822	1.12433	3.5415	4.49033		10.957	28.309	40.748	1.20533	3.114	4.48233
992	1002	2	12.78	SKDIQYLKDSL		9.971	28.9095	40.2037	0.897	2.602	3.61833		11.3507	27.529	39.8687	1.02167	2.47767	3.588		9.1045	27.3317	40.383	0.8195	2.46	3.63467		11.2607	28.9203	40.177	0.992	0.875	3.616		11.435	27.9515	36.473	1.029	2.5155	3.28267		10.712	29.3357	37.4613	0.964	2.64	3.37133
995	1002	2	13.15	IQYLKDSL		6.8145	14.4255	23.6293	0.409	0.866	1.418		9.06967	15.1293	26.782	0.544	0.908	1.607		7.148	14.59	23.9187	0.429	0.875333	1.435		7.48233	14.606	26.0173	0.465	0.442	1.561		7.949	14.5295	22.7327	0.477	0.8715	1.36367		8.723	15.181	25.5047	0.523333	0.911	1.53033
998	1019	5	16.51	LKDSLALGKTEEEALKHFRVKF		14.891	16.2115	26.6707	2.9785	3.2425	5.334		12.8047	18.8843	27.4703	2.561	3.777	5.494		13.259	18.6933	25.6215	2.652	3.73833	5.1245		13.977	17.9387	28.238	2.737	2.854	5.64767		13.1427	16.883	26.9357	2.62833	3.3765	5.387		14.7095	17.4577	28.892	2.9415	3.49167	5.7785
1001	1009	2	7.18	SLALGKTEE		37.9165	49.3355	60.6003	2.654	3.4535	4.242		39.005	49.611	62.1187	2.73033	3.4725	4.34833		39.21	49.34	60.6863	2.7445	3.454	4.248		38.7933	49.8767	61.096	2.815	2.674	4.27667		38.739	48.9355	59.2663	2.71167	3.4255	4.14867		39.002	49.7683	62.9585	2.73	3.48367	4.407
1001	1010	2	7.45	SLALGKTEEE		31.7305	43.995	58.3697	2.5385	3.5195	4.66933		32.429	45.56	58.4167	2.59433	3.645	4.67333		33.4645	45.0083	56.8947	2.677	3.60067	4.55133		32.4927	44.373	60.5313	2.711	2.574	4.84267		33.0343	44.2465	57.21	2.643	3.5395	4.577		32.9583	44.4245	60.6715	2.63667	3.5535	4.854
1001	1019	4	16.61	SLALGKTEEEALKHFRVKF		11.9855	17.7835	26.1543	2.0375	3.023	4.446		13.1417	18.1713	26.221	2.23433	3.08933	4.45767		13.457	18.3203	26.299	2.2875	3.11433	4.471		13.133	17.5463	28.2847	2.313	2.208	4.80867		13.28	18.3855	26.3337	2.25767	3.1255	4.477		13.4467	18.727	28.5335	2.286	3.18367	4.8505
1001	1021	4	16.01	SLALGKTEEEALKHFRVKFNE		11.204	15.804	23.5287	2.1285	3.0025	4.47067		12.025	17.0207	26.3007	2.28467	3.23367	4.997		12.145	16.8603	24.302	2.3075	3.20333	4.61767		13.5833	16.4167	26.131	2.348	2.368	4.965		11.9193	16.599	24.062	2.26467	3.154	4.57167		12.297	17.2233	29.1357	2.33633	3.27267	5.53567
1001	1022	3	16.1	SLALGKTEEEALKHFRVKFNEA		11.733	15.7525	22.097	2.347	3.1505	4.41933		11.7305	17.4347	27.2483	2.3465	3.487	5.45		11.598	17.4107	25.1557	2.3195	3.482	5.031		15.338	15.8747	25.1053	4.565	2.256	5.02133		14.0407	16.1805	22.6437	2.808	3.2365	4.52867		12.505	17.231	26.5275	2.501	3.446	5.3055
1001	1023	4	17.9	SLALGKTEEEALKHFRVKFNEAL		10.5625	14.817	21.739	2.218	3.1115	4.56533		10.164	15.59	27.4407	2.13433	3.274	5.76233		10.715	14.657	22.99	2.25	3.078	4.82767		10.866	15.347	28.2507	2.355	2.238	5.93267		10.5447	14.917	21.934	2.21433	3.133	4.606		10.966	15.8573	29.824	2.303	3.33	6.2635
1003	1019	4	14.69	ALGKTEEEALKHFRVKF		10.9815	16.4055	22.8527	1.6475	2.4605	3.428		13.3397	16.676	23.219	2.001	2.50133	3.483		11.853	17.1637	23.294	1.7775	2.57433	3.494		12.5023	15.7267	24.4603	1.878	1.935	3.669		11.325	15.792	22.5067	1.69867	2.369	3.37633		11.2997	16.2707	25.6543	1.695	2.44033	3.848
1003	1021	4	14.42	ALGKTEEEALKHFRVKFNE		10.5865	15.045	20.0347	1.7995	2.5575	3.406		10.901	15.4673	23.4963	1.853	2.62933	3.99433		10.3985	14.5387	22.288	1.768	2.47167	3.78867		12.5937	15.397	23.783	1.935	2.715	4.04333		10.2547	14.8415	21.8573	1.74333	2.523	3.71567		11.688	14.1173	23.4223	1.987	2.4	3.982
1003	1022	4	14.16	ALGKTEEEALKHFRVKFNEA		10.154	13.435	20.258	1.8275	2.4185	3.64667		10.0287	14.4977	22.25	1.80533	2.60933	4.005		9.8505	14.2683	21.0545	1.773	2.56833	3.7895		9.99367	14.6233	22.509	1.962	1.639	4.05133		10.0257	14.241	20.6903	1.80467	2.5635	3.72433		10.8247	14.8407	23.8525	1.94867	2.67133	4.2935
1003	1023	3	16.31	ALGKTEEEALKHFRVKFNEAL		8.685	12.647	18.3413	1.6505	2.403	3.485		8.83733	14.0117	23.9917	1.679	2.662	4.55867		9.127	12.6223	19.0323	1.7345	2.398	3.616		9.04733	13.1677	24.361	1.813	1.621	4.62867		10.288	12.6545	18.6017	1.95467	2.404	3.53433		9.143	13.9577	28.211	1.73733	2.65167	5.36
1010	1019	3	10.54	EALKHFRVKF		0.0565	0.1345	2.28433	0.0045	0.011	0.182667		-0.0706667	0.348667	3.07633	-0.00566667	0.0276667	0.246333		-0.0385	0.336667	2.21067	-0.003	0.027	0.177		0.0546667	0.355333	3.017	0.002	0.002	0.241333		0.0605	0.244	2.09867	0.005	0.02	0.167667		-0.0363333	0.589333	3.367	-0.00266667	0.047	0.269333
1010	1021	3	9.46	EALKHFRVKFNE		0.208	0.3295	2.318	0.0205	0.033	0.231667		0.233667	1.12533	5.192	0.0233333	0.112667	0.519		0.241	0.599	2.27267	0.024	0.06	0.227667		0.317	0.893333	4.63833	0.041	0.028	0.464		0.255667	0.537	2.23167	0.0256667	0.0535	0.223		0.285	1.072	7.958	0.0283333	0.107	0.796
1010	1022	2	9.53	EALKHFRVKFNEA		9.094	24.535	26.8537	1.0005	2.699	2.95367		10.3615	19.797	28.8423	1.1395	2.17767	3.17267		9.337	20.9483	27.8717	1.027	2.30433	3.066		9.25133	20.0907	31.2533	1.32	0.726	3.43767		9.529	20.95	27.766	1.048	2.305	3.054		9.7885	21.2113	30.767	1.0765	2.33333	3.384
1010	1023	3	12.38	EALKHFRVKFNEAL		0.484	0.4985	1.86833	0.058	0.0595	0.224333		0.596667	1.93233	9.99767	0.0716667	0.231667	1.2		0.2535	0.455333	1.80267	0.0305	0.0546667	0.216667		0.309	1.351	7.858	0	0	0.943		0.451	0.5245	1.954	0.054	0.063	0.2345		0.568333	2.1495	12.7595	0.0683333	0.258	1.531
1011	1021	3	8.82	ALKHFRVKFNE		-0.467	0.804	0.880667	-0.042	0.0725	0.079		0.618333	0.542333	3.50967	0.0556667	0.049	0.316		0.2505	0.245667	0.655333	0.0225	0.022	0.059		0.0453333	1.067	3.078	0.092	-0.051	0.277		0.343667	0.4045	1.03933	0.0306667	0.0365	0.0936667		0.334	1.21567	4.621	0.0303333	0.109667	0.416
1011	1023	3	11.52	ALKHFRVKFNEAL		0.027	-0.1355	0.635	0.003	-0.015	0.07		0.9795	1.95867	8.84533	0.1075	0.215333	0.972667		0.4865	0.501333	0.570667	0.0535	0.055	0.063		0.461667	1.19767	7.39267	0.08	0.022	0.813333		1.765	0.421	0.939667	0.194	0.0465	0.103333		0.491333	1.82133	10.714	0.054	0.200333	1.17867
1022	1044	5	12	ALRESWKTKVNWLAHNVSKDNRQ		38.812	58.4585	57.177	8.1505	12.2765	12.0073		51.4637	57.826	56.733	10.8073	12.1433	11.914		36.514	53.986	57.876	7.6675	11.337	12.154		49.616	55.7933	56.8347	10.665	10.218	11.9353		42.8297	56.5395	56.3393	8.99467	11.8735	11.8313		51.6873	56.154	57.2007	10.854	11.7923	12.012
1023	1033	3	12.25	LRESWKTKVNW		24.28	49.498	49.5263	2.1855	4.455	4.45733		44.3767	50.9803	50.093	3.994	4.58833	4.50833		19.713	46.9777	50.1487	1.774	4.228	4.51333		41.054	49.9257	50.5307	3.911	3.71	4.54767		29.0957	49.646	49.3633	2.61867	4.468	4.44267		45.0323	50.1487	50.011	4.053	4.513	4.50133
1023	1044	5	11.48	LRESWKTKVNWLAHNVSKDNRQ		36.5745	54.8815	53.9383	7.315	10.976	10.7873		48.3487	54.738	54.3357	9.66967	10.9477	10.867		35.3315	52.3033	55.777	7.066	10.4607	11.1557		47.615	52.4757	55.4143	9.742	9.46	11.0827		40.3617	55.7615	54.1767	8.07233	11.1525	10.835		49.9667	54.359	54.146	9.99333	10.8717	10.8293
1024	1033	3	11.85	RESWKTKVNW		25.7625	54.806	55.7977	2.061	4.3845	4.46367		49.1657	56.2443	56.085	3.933	4.49967	4.487		19.573	51.3403	55.732	1.566	4.10733	4.45833		45.6717	54.93	55.7693	3.81	3.624	4.46133		32.0877	56.548	55.5283	2.567	4.5235	4.442		50.8993	55.6957	56.0547	4.072	4.45533	4.48433
1024	1044	4	10.98	RESWKTKVNWLAHNVSKDNRQ		40.31	59.2395	59.0667	7.659	11.256	11.223		55.5217	59.456	59.116	10.5493	11.2967	11.2323		38.374	57.1117	61.089	7.291	10.8513	11.607		52.426	59.5427	60.7133	10.199	9.922	11.5353		43.1593	59.931	59.5603	8.20033	11.387	11.3167		53.6257	59.359	61.215	10.189	11.2783	11.631
1024	1044	5	10.98	RESWKTKVNWLAHNVSKDNRQ		40.7905	59.652	60.344	7.7505	11.334	11.465		56.5633	59.3463	60.0073	10.7467	11.276	11.4017		39.0695	57.7097	61.3815	7.423	10.965	11.6625		51.827	59.32	60.629	10.024	9.585	11.5193		43.865	59.82	60.0823	8.33467	11.366	11.4157		54.046	59.8167	60.8673	10.2687	11.3653	11.5647
1026	1044	4	11.8	SWKTKVNWLAHNVSKDNRQ		45.0775	65.282	66.2873	7.663	11.098	11.2687		61.6797	64.1383	67.299	10.4857	10.9037	11.441		41.031	60.9603	62.776	6.9755	10.3633	10.672		61.1907	64.6477	69.4467	10.815	10.225	11.806		47.5773	63.3845	63.8503	8.08833	10.7755	10.8547		59.4077	64.5593	65.5373	10.0993	10.9753	11.1417
1026	1044	5	11.8	SWKTKVNWLAHNVSKDNRQ		45.506	68.58	66.196	7.736	11.659	11.2537		62.627	67.634	66.3063	10.6467	11.4977	11.272		42.885	61.443	65.289	7.2905	10.4457	11.0993		62.2747	69.2297	68.6373	10.849	10.967	11.6683		50.3453	68.739	64.981	8.55867	11.686	11.0467		58.9087	67.6163	66.0343	10.0147	11.495	11.226
1028	1044	4	6	KTKVNWLAHNVSKDNRQ		33.1875	48.3115	48.5537	4.978	7.2465	7.283		44.2923	48.4733	48.1837	6.64367	7.271	7.22767		32.2945	45.772	47.8667	4.844	6.86567	7.18033		41.0493	47.2353	48.3267	6.509	5.913	7.249		34.929	46.7185	47.1627	5.23933	7.008	7.07433		43.84	48.42	48.497	6.576	7.263	7.27433
