# Supplementary material for: PI3Kδ is selectively inhibited by roginolisib through stabilizing of the C-terminal helix kα12
Source: Research Square preprint supplement (doi:10.21203/rs.3.rs-8048396/v1), 2026-01-07
Supplement: Supplementary file 3 [file 7ab3e78aec964be60ba6884c.docx]

Supplementary Figure Legends

**Figure S1**

Crystal structure of human PI3Kδ in complex with (a) roginolisib (cyan) solved at 2.75 Å resolution (PDB-ID: 9T07) and (b) IOA-288 (green) solved at 2.97 Å resolution (PDB-ID: 9T1P). The 2Fo -Fc electron density map (blue) contoured at 1.0 σ revealed an unambiguous binding mode identification of roginolisib and IOA-288, respectively.

**Figure S2**

D911 of the DFG kinase motif adopts alternative conformations in roginolisib- and idelalisib-bound PI3Kδ. **a** Representative snapshot depicting D911 (light orange sticks) being sterically pushed by roginolisib into a DFG-in like conformation. **b** D911 (light purple sticks) closer to a DFG-out conformation in the presence of idelalisib.

**Figure S3**

**a** Binding interactions of IOA-288 within the protein active site. IOA-288 forms hydrogen bonds with V828 and K779, a solvent-mediated hydrogen bond with D911, and π-π stacking with W760. **b** Crystal structure of human PI3Kδ in complex with IOA-288 (orange), solved at 2.97 Å resolution (PDB-ID: 9T1P). Key interactions include hydrogen bonds (dashed cyan lines) with V828 (hinge), K779, S754 (via aromatic fluorine), and the backbone NH of D911 (mediated by a water molecule), as well as π-π-interactions with W760.

**Figure S4**

Alignment of the modelled full-length p110δ structure (teal) and the p110β/p85β-icSH2 crystal structure (red). The p110δ C-terminal region unresolved in the crystal structure but modelled with Alphafold predictions and the p85β-icSH2 domains are highlighted in darker colours.

**Figure S5**

Heavy-atom root mean square deviation (RMSD) of bound ligands as function of time. The RMSD was calculated after superimposing the backbone atoms of PI3Kδ. **a** ATP. **b** Roginolisib. **c**. Idelalisib

**Figure S6**

Peptide map of p110δ. Each line represents a high-quality peptide that was analysed to measure its H/D exchange rate. Peptides are coloured according to their dynamics following the legend, with highly dynamic peptides shown in red and protected peptides coloured in blue.

**Figure S7**

C-terminal sequence variation among class I PI3K isoforms. **a** Sequence alignment towards the C-terminus of PI3K isoforms α-δ 27. Key residues of C-terminus (teal) are framed in red. **b** Structures of PI3K isoforms α-δ and their corresponding IC50 ratio relative to PI3Kδ. Residues highlighted in **a** are shown as sticks.

**Figure S8**

Protein-lipid FRET measured from intrinsic tryptophanes to the DANSYL-probe of the DANSYL-containing liposomes of PI3Kδ in the presence and absence of PDGFR pY, idelalisib (idel) and roginolisib (rogi). **a** Protein-lipid FRET signal measured for different PI3Kδ concentrations. **b** Bar-graph of FRET signal for a single PI3Kδ concentration (500 nM). Three independent experiments. Mean +/- SD. Unpaired student t-test was used to calculate p values.

**Figure S9**

PI3K C-terminus adopts slightly bent conformation in available structures of β and γ isoforms, with hinge between helix kα11 and kα12, and is predicted to be in similar conformation for δ isoform. Domains involved in membrane binding highlighted: C2 domain (light orange), kinase domain N-terminal lobe (light purple) and kinase domain C-terminal lobe (light blue). Crystal structures of β (left) and γ (middle) isoform with respective PDB ID 4BFR 46 and 1E7U 34 have resolved C-terminus (light teal). Crystal structure of ATP⋅Mg2+ (pink) bound δ isoform (right) with Alphafold2 27 predicted and modelled kα12 helix (dark teal) shows C-terminus in similar orientation to β and γ isoform.
