# Supplementary material for: PI3Kδ is selectively inhibited by roginolisib through stabilizing of the C-terminal helix kα12
Source: Research Square preprint supplement (doi:10.21203/rs.3.rs-8048396/v1), 2026-01-07
Supplement: Supplementary file 4 [file ba7b2cda19ba6f3506568ed1.docx]

**Supplementary Table S1. Summary of crystallographic information for PI3Kδ∙roginolisib.**

| PDB-ID | **9T07** |
| --- | --- |
| Data collection and processing |  |
| X-ray source | PXI/X06SA (SLS1) |
| Wavelength (Å) | 0.9999 |
| Detector | PILATUS 6M |
| Temperature [K] | 100 |
| Space group | P212121 |
| Unit cell parameters |  |
| *a, b, c* (Å) | 93.03, 113.39, 144.51 |
| *α, β, γ* (°) | 90.0, 90.0, 90.0 |
| Resolution (Å) | 2.75 (3.00-2.75)2 |
| Unique reflections | 39,134 (8,981)2 |
| *Rsym* (%)3 | 3.5 (44.4)2 |
| *Rmeas* (%)4 | 4.0 (49.3)2 |
| Completeness (%) | 96.7 (97.9)2 |
| Redundancy | 4.8 (4.9)2 |
| Mean I/σ(I)5 | 24.06 (3.23)2 |
| Refinement |  |
| Resolution range (Å) | 46.52 – 2.75 |
| Reflections used in refinement  (work / free) | 39,134 / 746 |
| Final R values for all reflections  (work6 / free7) (%) | 23.2 / 27.2 |
| No. Atoms  Proteins  Ligand  Water | 8,749  37  28 |
| RMSZ |  |
| Bonds (Å) | 0.66 |
| Angles (°) | 1.06 |
| Ramachandran parameters (%)8 |  |
| Preferred regions | 94.4 |
| Allowed regions | 4.9 |
| Outliers | 0.7 |
| 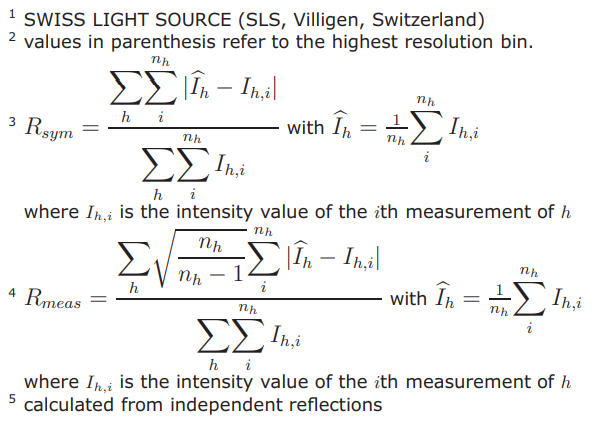  6*Rwork* = (∑⎟(F*obs* – F*calc*)⎥ / ∑⎟F*obs*⎥)  7*Rfree* = *Rwork* based on ~1000 (at least 5%) of reflections excluded from refinement  8Calculated using COOT | | |

**Supplementary Table S2. Summary of crystallographic information for PI3Kδ∙IOA-288.**

| PDB-ID | **9T1P** |
| --- | --- |
| Data collection and processing |  |
| X-ray source | PXI/X06SA (SLS1) |
| Wavelength (Å) | 0.9999 |
| Detector | PILATUS 6M |
| Temperature [K] | 100 |
| Space group | P212121 |
| Unit cell parameters |  |
| *a, b, c* (Å) | 93.23, 113.34, 144.59 |
| *α, β, γ* (°) | 90.0, 90.0, 90.0 |
| Resolution (Å) | 2.97 (3.20-2.97)2 |
| Unique reflections | 32,158 (5,053)2 |
| *Rsym* (%)3 | 10.6 (43.5)2 |
| *Rmeas* (%)4 | 14.1 (65.4)2 |
| Completeness (%) | 99.2 (98.1)2 |
| Redundancy | 3.7 (3.8)2 |
| Mean I/σ(I)5 | 6.6 (1.6)2 |
| Refinement |  |
| Resolution range (Å) | 48.43 – 2.97 |
| Reflections used in refinement  (work / free) | 32,142 / 871 |
| Final R values for all reflections  (work6 / free7) (%) | 21.9 / 27.6 |
| No. Atoms  Proteins  Ligand  Water | 8,743  38  49 |
| RMSZ |  |
| Bonds (Å) | 0.63 |
| Angles (°) | 1.05 |
| Ramachandran parameters (%)8 |  |
| Preferred regions | 93.7 |
| Allowed regions | 4.9 |
| Outliers | 1.4 |
| 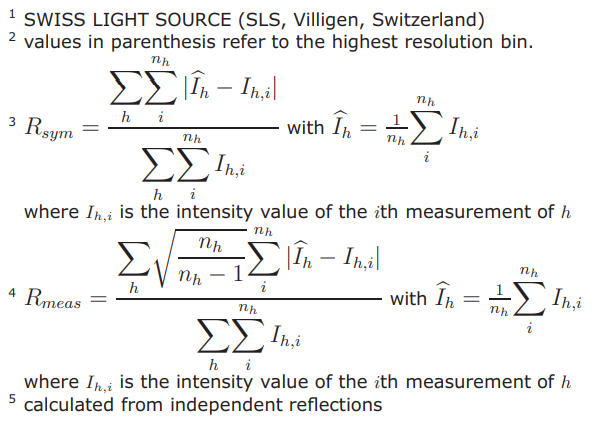  6*Rwork* = (∑⎟(F*obs* – F*calc*)⎥ / ∑⎟F*obs*⎥)  7*Rfree* = *Rwork* based on ~1000 (at least 5%) of reflections excluded from refinement  8Calculated using COOT | |
