# Supplementary material for: PI3Kδ is selectively inhibited by roginolisib through stabilizing of the C-terminal helix kα12
Source: Research Square preprint supplement (doi:10.21203/rs.3.rs-8048396/v1), 2026-01-07
Supplement: Supplementary file 5 [file cdd934729b7ea0ef41122760.docx]

| **Reliability and reproducibility checklist for molecular dynamics simulations**  ***All boxes must be marked YES by acceptance unless “Response not needed if No”.** | | **Yes** | **No** | **Response  (Please state where this information can be found in the text)** |
| --- | --- | --- | --- | --- |
| **1. Convergence of simulations and analysis** | | | | |
| 1a. Is an evaluation presented in the text to show that the property being measured has equilibrated in the simulations (*e.g.* time-course analysis)? | |  |  | Results, line 153 |
| 1b. Then, is it described in the text how simulations are split into equilibration and production runs and how much data were analyzed from production runs? | |  |  | Methods, lines 441–446 and 459–462;  Figure 3, caption line 10 |
| 1c. Are there at least 3 simulations per simulation condition with statistical analysis? | |  |  | Methods, lines 444 and 454 |
| 1d. Is evidence provided in the text that the simulation results presented are independent of initial configuration? | |  |  | Results, lines 156–157, 160, and 183 |
| **2. Connection to experiments** | | | | |
| 2a. Are calculations provided that can connect to experiments (*e.g.* loss or gain in function from mutagenesis, binding assays, NMR chemical shifts, J-couplings, SAXS curves, interaction distances or FRET distances, structure factors, diffusion coefficients, bulk modulus and other mechanical properties, *etc*.)? | |  |  | Molecular interactions quantified using angle and distance measurements (Results, lines 159–164 and 177–179); agreement of membrane contact interface with HDX measurements is described qualitatively (Results, lines 275–277) |
| **3. Method choice** | | | | |
| 3a. Do simulations contain membranes, membrane proteins, intrinsically disordered proteins, glycans, nucleic acids, polymers, or cryptic ligand binding? | |  |  | Response not needed if **No** |
| 3b. Is it described in the text whether the accuracy of the chosen model(s) is sufficient to address the question(s) under investigation (e.g. all-atom vs. coarse-grained models, fixed charge vs. polarizable force fields, implicit vs. explicit solvent or membrane, force field and water model, etc.)? | |  |  | Details of all-atom simulation force fields provided in Methods; chosen force fields are widely used for protein–ligand and membrane systems, respectively; explicit justification of the model and force field choice was not provided |
| 3c. Is the timescale of the event(s) under investigation beyond the brute-force MD simulation timescale in this study that enhanced sampling methods are needed? | |  |  |  |
|  | If **YES**, are the parameters and convergence criteria for the enhanced sampling method clearly stated? |  |  |  |
|  | If **NO,** is the evidence provided in the text? |  |  | Observation of stable ligand binding supported by RMSD analysis (Results, line 153) |
| **4. Code and reproducibility** | | | | |
| 4a. Is a table provided describing the system setup that includes simulation box dimensions, total number of atoms, total number of water molecules, salt concentration, lipid composition (number of molecules and type)? | |  |  | Information provided in text but not tabulated: Methods, lines 438–440 and 449–456 |
| 4b. Is it described in the text what simulation and analysis software and which versions are used? | |  |  | Methods, lines 435 and 468 |
| 4c. Are other parameters for the system setup described in the text, such as protonation state, type of structural restraints if applied, nonbonded cutoff, thermostat and barostat, etc.? | |  |  | Methods, lines 446–448 and 462–467 |
| 4d. Are initial coordinate and simulation input files and a coordinate file of the final output provided as supplementary files or in a public repository? | |  |  | Deposited at Zenodo: 10.5281/zenodo.17911609 |
| 4e. Is there custom code or custom force field parameters? | |  |  | Response not needed if **No** |
|  | If **YES**, are they provided as supplementary files or in a public repository? |  |  |  |
